# Supplementary material for: Identification of gene expression and DNA methylation of SERPINA5 and TIMP1 as novel prognostic markers in lower-grade gliomas
Source: PubMed Central journal article supplement (PMC7275683; doi:10.7717/peerj.9262), 2020-06-03

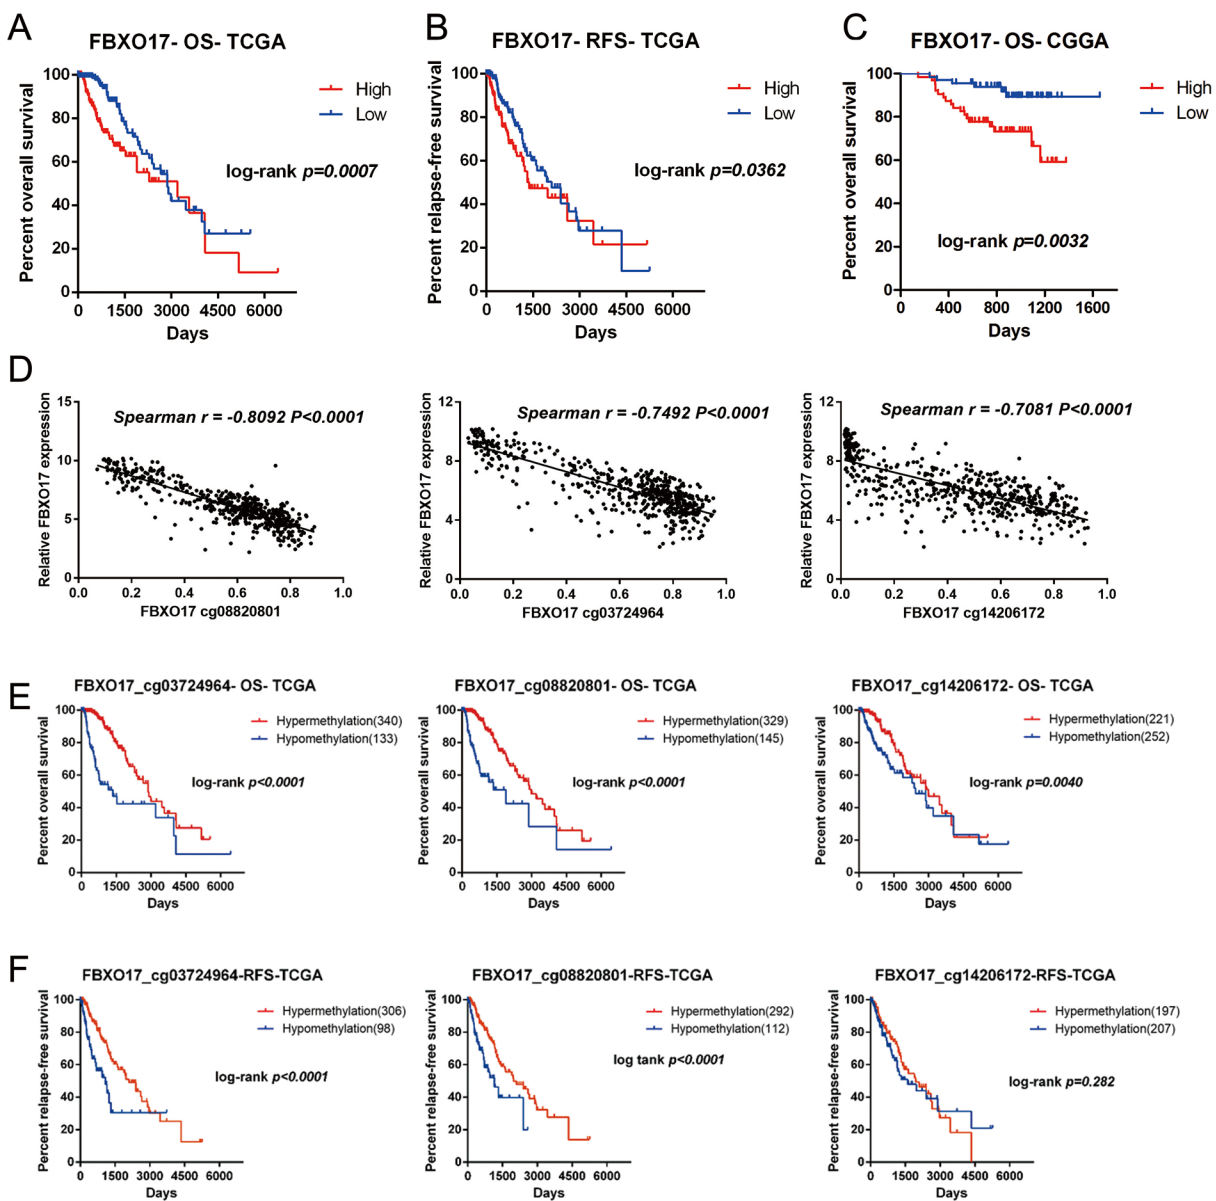

Supplement: peerj-08-9262-s001.pdf [file peerj-08-9262-s001.pdf]
