# Supplementary material for: Identification of gene expression and DNA methylation of SERPINA5 and TIMP1 as novel prognostic markers in lower-grade gliomas
Source: PeerJ. 2020 Jun 3;8:e9262. doi: 10.7717/peerj.9262 (PMC7275683; doi:10.7717/peerj.9262)
Supplement: Table S3 [file peerj-08-9262-s004.xlsx]

## Sheet: TCGA LGG_prognosis_92_sample
Differential expressed genes between short-term survivors (<2 years) and long-term survivors (≥2 years) in the 92 lower-grade gliomas in the TCGA microarray dataset.
	logFC	t	P.Value	adj.P.Val	B
EMP3	2.83965	7.42879	5.74e-11	1.18e-06	14.5807
FBXO17	2.35888	7.11492	2.49e-10	1.57e-06	13.1983
SERPINA5	2.57563	6.68779	1.79e-09	3.56e-06	11.3419
VAV3	2.70041	6.64817	2.15e-09	3.56e-06	11.1714
IGFBP2	2.43297	6.6389	2.24e-09	3.56e-06	11.1315
TIMP1	2.41737	6.60531	2.61e-09	3.83e-06	10.9873
METTL7B	2.58595	6.46887	4.86e-09	5.39e-06	10.4038
CHI3L1	3.94537	6.3835	7.15e-09	6.54e-06	10.0409
GALNT3	2.18187	6.32417	9.34e-09	7.67e-06	9.78969
ABCC3	3.30565	6.25293	1.29e-08	9.1e-06	9.48912
ZDHHC23	2.07999	6.105	2.49e-08	1.6e-05	8.86908
STAC	2.87253	6.09192	2.63e-08	1.64e-05	8.81454
AQP5	3.05635	5.99599	4.03e-08	2.06e-05	8.41593
ADAMTS20	-2.53047	-5.98949	4.14e-08	2.06e-05	8.38901
CMYA5	2.44483	5.98541	4.22e-08	2.06e-05	8.37211
MOXD1	3.5801	5.97534	4.41e-08	2.06e-05	8.33044
CRTAC1	-2.27301	-5.974	4.44e-08	2.06e-05	8.32493
FBLN7	2.09286	5.96532	4.61e-08	2.06e-05	8.28901
HILS1	2.47363	5.88375	6.59e-08	2.76e-05	7.95282
HOXA3	3.00508	5.86805	7.06e-08	2.84e-05	7.88833
VASN	2.04814	5.84051	7.97e-08	3.05e-05	7.77539
HOXA5	2.88931	5.83477	8.17e-08	3.05e-05	7.75191
TMEM100	-2.02718	-5.79831	9.57e-08	3.12e-05	7.60281
DAPL1	-2.44084	-5.78831	1e-07	3.12e-05	7.56196
TOM1L1	2.44476	5.77095	1.08e-07	3.26e-05	7.49118
MAP1LC3C	2.19566	5.69821	1.48e-07	3.99e-05	7.19556
C13orf26	2.36425	5.65938	1.75e-07	4.45e-05	7.03844
HMX1	-2.7359	-5.64542	1.86e-07	4.53e-05	6.98207
EVC2	2.14135	5.6377	1.92e-07	4.58e-05	6.95091
WISP1	2.18659	5.60247	2.23e-07	5.12e-05	6.80906
RARRES2	2.41598	5.53427	2.99e-07	6.03e-05	6.5356
PDLIM4	2.17358	5.50621	3.37e-07	6.58e-05	6.42351
SHROOM3	2.05002	5.49382	3.55e-07	6.81e-05	6.37412
NPNT	2.04976	5.48464	3.69e-07	7.01e-05	6.33759
RBP1	2.14245	5.47416	3.86e-07	7.27e-05	6.29589
NKX2-5	2.54895	5.4478	4.31e-07	7.7e-05	6.19113
GDF15	2.14491	5.43916	4.47e-07	7.84e-05	6.15686
ANXA1	2.14143	5.42409	4.77e-07	8.02e-05	6.09718
IGF2BP3	2.15755	5.39938	5.29e-07	8.42e-05	5.99942
ADAM12	2.10936	5.37809	5.79e-07	8.92e-05	5.9154
TSTD1	2.10489	5.3738	5.9e-07	8.97e-05	5.89848
FABP5	2.14494	5.33128	7.05e-07	9.8e-05	5.73121
TRPM8	2.65724	5.32905	7.12e-07	9.8e-05	5.72246
DSG2	2.54841	5.31123	7.67e-07	9.95e-05	5.65258
WNT7B	-2.34509	-5.31052	7.69e-07	9.95e-05	5.64982
MEOX2	3.4213	5.31003	7.71e-07	9.95e-05	5.64786
MAOB	2.1219	5.29174	8.32e-07	0.000105415	5.57628
NEUROD4	-2.4065	-5.27358	8.97e-07	0.000107451	5.50533
PLA2G5	2.54902	5.22212	1.11e-06	0.000123375	5.30489
C11orf63	2.20048	5.20621	1.19e-06	0.000130384	5.24316
GFRA1	-2.00876	-5.20039	1.22e-06	0.000132156	5.22058
NDST4	-2.31429	-5.18108	1.32e-06	0.000138757	5.14579
FERMT1	-2.25021	-5.14986	1.5e-06	0.000150892	5.02522
PRLHR	-2.91304	-5.13889	1.57e-06	0.00015654	4.98292
DLL3	-2.10105	-5.13859	1.57e-06	0.00015654	4.98176
C5orf38	-2.56428	-5.11152	1.76e-06	0.000167044	4.87763
LPPR3	-2.07592	-5.09449	1.88e-06	0.000173793	4.8123
RYR3	2.25716	5.06423	2.13e-06	0.000191939	4.69647
HOXB3	2.73139	5.04058	2.35e-06	0.000204254	4.60618
HOXA2	2.42745	5.01428	2.61e-06	0.000216369	4.50607
SMOC1	-2.22517	-4.99347	2.84e-06	0.000227234	4.42706
PLA2G2A	2.56878	4.98471	2.95e-06	0.00023275	4.39384
CLEC5A	2.27239	4.97019	3.13e-06	0.000241427	4.33887
LOXL1	2.05084	4.95403	3.34e-06	0.000251948	4.27777
RGS22	2.40149	4.94595	3.45e-06	0.000257509	4.24728
FMOD	2.26791	4.93496	3.61e-06	0.00026548	4.20587
SHOX2	2.7686	4.90958	3.99e-06	0.000284722	4.11037
DMRTA2	2.72523	4.89726	4.2e-06	0.000293358	4.06409
SFRP2	-2.79794	-4.89704	4.2e-06	0.000293358	4.06327
PDPN	2.25224	4.7658	7.1e-06	0.000404715	3.57469
CA3	2.15595	4.76403	7.15e-06	0.000405306	3.56817
POSTN	3.51962	4.71999	8.51e-06	0.000447815	3.40597
SAA1	2.02471	4.70381	9.07e-06	0.000470074	3.34662
WNT16	2.08463	4.66225	1.07e-05	0.00052687	3.19468
LOC154822	-2.74146	-4.64088	1.16e-05	0.000555482	3.11689
KLRC2	-2.59555	-4.62397	1.24e-05	0.00057948	3.05545
CSMD3	-2.1595	-4.59121	1.41e-05	0.000628408	2.93686
CUX2	-2.26761	-4.5884	1.42e-05	0.000631556	2.92671
CNGA3	2.19268	4.57178	1.52e-05	0.000652515	2.86676
LGR6	2.6504	4.556	1.62e-05	0.000679826	2.80998
HOXA4	2.41926	4.49485	2.04e-05	0.000786069	2.59102
GPR1	2.01131	4.48615	2.11e-05	0.000803732	2.56003
LTF	3.22935	4.46442	2.3e-05	0.000853004	2.48277
HOXA7	2.92683	4.45377	2.39e-05	0.000878939	2.44499
PAX1	-2.33701	-4.41949	2.73e-05	0.000957361	2.32374
TCTEX1D1	2.45264	4.41602	2.76e-05	0.000957361	2.31152
C21orf62	2.01228	4.40149	2.92e-05	0.000992762	2.26033
HMGA2	2.03843	4.29369	4.39e-05	0.00134585	1.88398
IRX2	-2.56522	-4.25732	5.02e-05	0.00149118	1.75836
CXCL14	2.0714	4.25167	5.13e-05	0.00150595	1.73891
OTP	2.17654	4.18883	6.48e-05	0.00179252	1.52373
EYA4	2.10176	4.18561	6.55e-05	0.00180355	1.51277
HOXD11	2.04136	4.17164	6.9e-05	0.00186416	1.46524
SLC47A2	2.07735	4.16885	6.97e-05	0.00187078	1.45577
HPSE2	-2.23379	-4.08447	9.49e-05	0.00230362	1.17111
SPHKAP	-2.03909	-4.0559	0.000105284	0.00247027	1.07562
DDIT4L	2.10689	3.87339	0.000202023	0.00398112	0.476566
COL22A1	2.29196	3.83084	0.000234549	0.00434985	0.339694
TSHR	-2.14285	-3.69911	0.000369938	0.00598017	-0.0771996
IL13RA2	2.15382	3.68407	0.000389442	0.00619561	-0.124117
DES	2.0712	3.67948	0.00039559	0.00623769	-0.138418
ALDH1A3	2.00093	3.65884	0.000424381	0.00655079	-0.202531
psiTPTE22	-2.05996	-3.63883	0.000454187	0.0068451	-0.264441
TLX1	-2.24625	-3.61734	0.000488392	0.0071466	-0.330628
C2orf39	2.02163	3.58449	0.000545445	0.00773877	-0.431264
IRX1	-2.18516	-3.33438	0.00123812	0.013449	-1.17469
