# Supplementary material for: Identification of gene expression and DNA methylation of SERPINA5 and TIMP1 as novel prognostic markers in lower-grade gliomas
Source: PeerJ. 2020 Jun 3;8:e9262. doi: 10.7717/peerj.9262 (PMC7275683; doi:10.7717/peerj.9262)
Supplement: Table S4 [file peerj-08-9262-s005.xlsx]

## Sheet: TCGA_LGG_prognosis_473_sampl
Differential expressed genes between short-term survivors (<2 years) and long-term survivors (≥2 years) in the 473 lower-grade gliomas in the TCGA microarray dataset.
GeneID	logFC	t	P.Value	adj.P.Val	B
EEF2	-0.299183	-5.92153	6.14613e-09	0.00012618	9.97845
EIF4B	-0.292454	-5.65885	2.64672e-08	0.000271686	8.63115
PABPC3	-0.42427	-5.49705	6.33206e-08	0.000433324	7.82764
GDNF	-0.637037	-5.39979	1.059e-07	0.000543534	7.35447
CSTF2T	-0.178693	-5.29843	1.79551e-07	0.000563654	6.86919
FCHSD1	0.49737	5.26062	2.18172e-07	0.000563654	6.69025
FAM110B	-0.494793	-5.22396	2.6324e-07	0.000563654	6.51784
DERL3	0.605962	5.22091	2.67372e-07	0.000563654	6.50354
LGR6	1.31915	5.21443	2.7635e-07	0.000563654	6.47322
FAM117B	-0.273927	-5.19929	2.98516e-07	0.000563654	6.40241
EIF3L	-0.308451	-5.197	3.02006e-07	0.000563654	6.39174
TNFRSF14	0.453423	5.15127	3.80754e-07	0.000650822	6.17917
RAP2A	-0.376329	-5.13558	4.12113e-07	0.000650822	6.10658
DDX6	-0.172391	-5.11996	4.45782e-07	0.000653305	6.03457
MEOX2	1.22947	5.10328	4.84687e-07	0.000653305	5.95785
PION	0.579889	5.09236	5.11923e-07	0.000653305	5.90774
FBXO39	0.611383	5.05775	6.08355e-07	0.000653305	5.74958
EMP3	0.973576	5.05406	6.19599e-07	0.000653305	5.7328
FERMT1	-0.873807	-5.05036	6.31098e-07	0.000653305	5.71596
LYSMD1	-0.175488	-5.03605	6.77524e-07	0.000653305	5.65093
TOX3	-0.67261	-5.03523	6.80269e-07	0.000653305	5.64723
SUFU	-0.208424	-5.02944	7.00083e-07	0.000653305	5.62093
CUL7	0.369866	5.01039	7.6918e-07	0.000686577	5.53473
BMP2	-0.737145	-4.98499	8.71629e-07	0.000745606	5.42025
HMX1	-0.916582	-4.96244	9.73523e-07	0.000797971	5.31906
TTC3	-0.263883	-4.9548	1.01058e-06	0.000797971	5.28487
DSCAML1	-0.62399	-4.92718	1.15633e-06	0.00087924	5.16161
RCOR2	-0.672814	-4.90917	1.26206e-06	0.000884833	5.08159
TRIP6	0.490346	4.90265	1.30255e-06	0.000884833	5.05271
H2AFY2	-0.54506	-4.88874	1.39325e-06	0.000884833	4.99116
RDH5	0.489628	4.88771	1.40019e-06	0.000884833	4.98662
CYP4V2	0.263009	4.88331	1.43029e-06	0.000884833	4.96718
TSTD1	0.8814	4.88008	1.45276e-06	0.000884833	4.95293
RARRES2	0.935003	4.87829	1.46538e-06	0.000884833	4.94502
ULK4	0.415855	4.87102	1.51769e-06	0.000890235	4.91295
PPM1M	0.32191	4.86094	1.59315e-06	0.00090854	4.8686
RGMB	-0.426204	-4.83183	1.83193e-06	0.00100781	4.74099
C4orf14	-0.18127	-4.82694	1.87537e-06	0.00100781	4.71958
ECHDC2	0.550589	4.82074	1.93171e-06	0.00100781	4.69255
CUX2	-1.02707	-4.81732	1.96358e-06	0.00100781	4.6776
LPPR3	-0.932542	-4.80772	2.05557e-06	0.00102929	4.63578
NSUN7	0.724452	4.7962	2.17147e-06	0.00106143	4.5857
WDR66	0.557711	4.78336	2.30809e-06	0.00110198	4.52999
RYR3	0.868011	4.76781	2.48466e-06	0.00114112	4.4627
CRTAC1	-0.776045	-4.76641	2.50123e-06	0.00114112	4.45663
ZDHHC22	-0.635659	-4.74373	2.78401e-06	0.00124252	4.35888
SLCO5A1	-0.628804	-4.72416	3.05248e-06	0.00132356	4.27489
RRAGB	-0.197646	-4.72125	3.09453e-06	0.00132356	4.26242
KIF26A	-0.617711	-4.70684	3.31089e-06	0.00134795	4.20078
SLC27A3	0.435148	4.70483	3.34213e-06	0.00134795	4.19222
BCL7A	-0.371511	-4.69828	3.44612e-06	0.00134795	4.16427
NCRNA00188	-0.304512	-4.69795	3.45155e-06	0.00134795	4.16284
NACA2	-0.343415	-4.69146	3.55778e-06	0.00134795	4.1352
MIR155HG	0.529304	4.689	3.5988e-06	0.00134795	4.12475
LOC644538	0.47422	4.68827	3.61116e-06	0.00134795	4.12162
SHD	-0.849269	-4.68334	3.6951e-06	0.00135465	4.10067
ANXA5	0.372244	4.67678	3.80979e-06	0.00137219	4.07281
TAGLN2	0.505046	4.66951	3.9411e-06	0.00137528	4.04192
GALNT3	0.676706	4.66889	3.95233e-06	0.00137528	4.03933
VDAC2	-0.200254	-4.64889	4.33691e-06	0.00147344	3.95471
TFCP2L1	0.890192	4.64397	4.43698e-06	0.00147344	3.93393
NPEPL1	0.40702	4.64335	4.44976e-06	0.00147344	3.93131
PLP2	0.572373	4.63035	4.72555e-06	0.00152226	3.87653
CD58	0.508654	4.62076	4.93942e-06	0.00152226	3.83621
DSG2	0.954078	4.62052	4.94471e-06	0.00152226	3.83524
TTC7A	0.252374	4.61312	5.11627e-06	0.00152226	3.80418
EPHB1	-0.555567	-4.61275	5.12496e-06	0.00152226	3.80263
AQP5	1.02445	4.60829	5.23128e-06	0.00152226	3.78393
NTN4	-0.589712	-4.60823	5.23282e-06	0.00152226	3.78367
MDGA2	-0.664536	-4.60729	5.25543e-06	0.00152226	3.77974
NTNG2	-0.45738	-4.60692	5.26451e-06	0.00152226	3.77817
ZNF492	-0.552854	-4.59684	5.51403e-06	0.00157226	3.73601
ARAP3	0.453715	4.58632	5.78656e-06	0.00157267	3.69209
TMEM100	-0.72999	-4.58504	5.82067e-06	0.00157267	3.68674
CCDC61	0.258978	4.58491	5.82401e-06	0.00157267	3.68622
SLC25A45	0.466144	4.58351	5.86149e-06	0.00157267	3.68038
GAS8	0.241939	4.5815	5.91568e-06	0.00157267	3.672
PODNL1	0.662421	4.57553	6.07951e-06	0.00157267	3.64714
ONECUT2	-0.570753	-4.5747	6.10268e-06	0.00157267	3.64368
KDM4B	-0.232809	-4.57379	6.1283e-06	0.00157267	3.63987
STAC	0.912302	4.5677	6.30114e-06	0.00159707	3.61456
NXN	-0.297014	-4.56068	6.50619e-06	0.00161316	3.58542
GSTA4	-0.201783	-4.55966	6.53673e-06	0.00161316	3.58116
SPAG17	0.738986	4.55753	6.60036e-06	0.00161316	3.57234
XKR8	0.528713	4.5516	6.78106e-06	0.00163462	3.54777
RAB34	0.566139	4.54946	6.8474e-06	0.00163462	3.53891
COX15	-0.155115	-4.5418	7.09014e-06	0.00166166	3.50723
MYST2	-0.190351	-4.5388	7.18756e-06	0.00166166	3.49481
GFRA1	-0.754834	-4.53831	7.20349e-06	0.00166166	3.4928
SULF2	-0.424407	-4.52999	7.48096e-06	0.00170649	3.45843
PLA2G5	0.940329	4.52298	7.72237e-06	0.0017422	3.42954
RBP1	0.760724	4.51858	7.87789e-06	0.00174665	3.41142
AP1S3	0.408343	4.51761	7.91223e-06	0.00174665	3.40746
TOMM20	-0.185171	-4.51514	8.0014e-06	0.00174754	3.39727
TFRC	0.377817	4.50744	8.28481e-06	0.00175873	3.36563
EIF3H	-0.219167	-4.50695	8.30314e-06	0.00175873	3.36362
C7orf46	0.536155	4.50677	8.30965e-06	0.00175873	3.36291
SH2D4A	0.760225	4.49879	8.61425e-06	0.00179262	3.33018
AMOTL2	-0.378219	-4.49335	8.82807e-06	0.00179262	3.3079
OPA3	0.180945	4.49173	8.89289e-06	0.00179262	3.30125
METTL7B	0.853056	4.49012	8.95764e-06	0.00179262	3.29465
PDPN	0.93965	4.48972	8.97369e-06	0.00179262	3.29303
IGBP1	-0.194424	-4.48923	8.99367e-06	0.00179262	3.29101
CABP4	0.464607	4.48152	9.31094e-06	0.00181694	3.2595
ZNF737	-0.276314	-4.47572	9.55678e-06	0.00181694	3.23582
FCHSD2	-0.283117	-4.47378	9.64026e-06	0.00181694	3.22792
C14orf19	-0.3654	-4.47315	9.6674e-06	0.00181694	3.22537
LRRC4	-0.300682	-4.4697	9.81818e-06	0.00181694	3.21131
TMEM61	0.531071	4.46882	9.85725e-06	0.00181694	3.2077
SLC13A3	0.569936	4.46866	9.86417e-06	0.00181694	3.20706
SSH3	0.460706	4.46756	9.91286e-06	0.00181694	3.20259
HIST3H2A	-0.504832	-4.46429	1.00594e-05	0.00181694	3.18926
LOC728643	-0.226123	-4.46402	1.00716e-05	0.00181694	3.18816
DPYSL4	-0.360639	-4.46363	1.00892e-05	0.00181694	3.18657
NKAIN1	-0.583086	-4.46068	1.02232e-05	0.00182269	3.17458
SEMA4G	-0.290717	-4.45904	1.02987e-05	0.00182269	3.1679
S100A13	0.49049	4.45329	1.05668e-05	0.00182499	3.14456
PIPOX	0.528665	4.45037	1.07056e-05	0.00182499	3.1327
NEAT1	0.498221	4.4458	1.09264e-05	0.00182499	3.11417
DPCR1	0.322927	4.44529	1.09517e-05	0.00182499	3.11207
PID1	-0.437512	-4.44523	1.09545e-05	0.00182499	3.11183
SOX6	-0.40758	-4.44467	1.09821e-05	0.00182499	3.10955
RPS25	-0.267311	-4.44418	1.10057e-05	0.00182499	3.1076
MRPL45	-0.168471	-4.44384	1.10228e-05	0.00182499	3.10619
SLC25A21	-0.547748	-4.43931	1.12479e-05	0.00184735	3.08784
CHD8	-0.160994	-4.43261	1.15884e-05	0.00188817	3.06076
MAP1LC3C	0.702865	4.42647	1.19094e-05	0.0019252	3.03595
CNNM2	-0.234322	-4.42222	1.21367e-05	0.00194319	3.01879
ADAMTSL4	0.493619	4.42087	1.221e-05	0.00194319	3.01332
KDM5B	-0.21933	-4.41636	1.24566e-05	0.00196459	2.99517
KLHL9	-0.258918	-4.41289	1.265e-05	0.00196459	2.98119
GSTK1	0.223467	4.40545	1.30744e-05	0.00196459	2.95124
VPS52	-0.113714	-4.40535	1.30805e-05	0.00196459	2.95082
TMEM216	0.340952	4.405	1.31008e-05	0.00196459	2.94941
ZMYND10	0.585885	4.40386	1.31671e-05	0.00196459	2.94483
EFEMP2	0.548573	4.40334	1.31973e-05	0.00196459	2.94275
DIRAS3	0.677636	4.40318	1.32068e-05	0.00196459	2.9421
FAM10A4	-0.206067	-4.40182	1.32864e-05	0.00196459	2.93665
ZC4H2	-0.321185	-4.40101	1.3334e-05	0.00196459	2.93341
CLIC1	0.475714	4.3982	1.35011e-05	0.00196459	2.9221
2020-03-05	-0.147404	-4.39789	1.35197e-05	0.00196459	2.92085
MN1	-0.457237	-4.39326	1.37994e-05	0.00196459	2.90227
SF3A1	-0.165532	-4.39119	1.39263e-05	0.00196459	2.89397
MOXD1	1.1557	4.39074	1.39534e-05	0.00196459	2.8922
CCDC129	0.785926	4.39063	1.39607e-05	0.00196459	2.89173
C1orf110	0.556284	4.39033	1.39792e-05	0.00196459	2.89053
ISG20	0.510985	4.38891	1.40669e-05	0.00196459	2.88485
MIPOL1	-0.495333	-4.38604	1.42461e-05	0.00197616	2.87337
GSDMD	0.418036	4.37913	1.4687e-05	0.00201691	2.84573
CBARA1	-0.190333	-4.37837	1.47363e-05	0.00201691	2.84269
PABPC5	-0.554545	-4.37369	1.50434e-05	0.00204531	2.82398
KIAA0495	0.515699	4.36972	1.53086e-05	0.00206738	2.80813
LGI4	0.638157	4.36826	1.54072e-05	0.00206738	2.80231
TAPT1	-0.169384	-4.36475	1.5647e-05	0.00208054	2.78831
DCX	-0.679864	-4.36387	1.5708e-05	0.00208054	2.78478
CMYA5	0.743871	4.35928	1.60281e-05	0.00210934	2.76648
KIAA0182	-0.298733	-4.35286	1.64861e-05	0.00214145	2.74094
FLRT1	-0.400716	-4.34944	1.6735e-05	0.00214145	2.72736
EFNA2	-0.47749	-4.34916	1.67551e-05	0.00214145	2.72627
EEF1A1	-0.246321	-4.34916	1.67553e-05	0.00214145	2.72626
MT1M	0.625851	4.34864	1.67937e-05	0.00214145	2.72418
OPHN1	-0.414794	-4.34646	1.69548e-05	0.00214866	2.71553
CDHR1	-0.585209	-4.34211	1.72812e-05	0.00216689	2.69824
STEAP3	0.65053	4.34173	1.73098e-05	0.00216689	2.69674
C6orf134	-0.256047	-4.33602	1.77474e-05	0.00220821	2.67412
SATL1	-0.203454	-4.32942	1.82671e-05	0.00225918	2.64796
CHI3L1	1.27874	4.32638	1.85109e-05	0.00227562	2.63594
HOXA1	0.664454	4.32411	1.86953e-05	0.00228238	2.62696
S100A16	0.396495	4.32297	1.87882e-05	0.00228238	2.62247
HNRNPA1L2	-0.183972	-4.31947	1.90771e-05	0.00230384	2.60865
RPL4	-0.268327	-4.31716	1.92702e-05	0.00231355	2.59952
NLGN2	-0.215278	-4.31384	1.95511e-05	0.00231727	2.58641
SEC24C	-0.153676	-4.31321	1.96046e-05	0.00231727	2.58394
FGFRL1	0.492509	4.30961	1.99136e-05	0.00231727	2.56977
KLRC2	-1.04607	-4.30903	1.99644e-05	0.00231727	2.56746
C3orf59	-0.34148	-4.30894	1.99721e-05	0.00231727	2.56711
CALCRL	-0.583069	-4.30887	1.99785e-05	0.00231727	2.56682
SSTR5	-0.549396	-4.30463	2.03501e-05	0.00234712	2.55013
FAM159A	0.466776	4.30312	2.04839e-05	0.00234935	2.54419
SIRT1	-0.21653	-4.29908	2.08459e-05	0.00237759	2.52833
C10orf2	-0.245224	-4.29758	2.09824e-05	0.00237994	2.52242
ACOT12	0.360478	4.29139	2.15533e-05	0.00241626	2.49811
TMCC1	-0.196176	-4.29098	2.15913e-05	0.00241626	2.49651
PRAM1	0.567335	4.2903	2.16557e-05	0.00241626	2.49381
IFRD1	0.197432	4.28601	2.20619e-05	0.00244468	2.47699
RPL3	-0.250305	-4.28443	2.22126e-05	0.00244468	2.47082
TERF2	-0.116407	-4.28353	2.22996e-05	0.00244468	2.46728
KLKB1	0.500414	4.28263	2.23867e-05	0.00244468	2.46375
INHBC	-0.451278	-4.27491	2.31467e-05	0.00251429	2.43353
LPPR1	-0.583314	-4.27267	2.3372e-05	0.0025254	2.42476
TIMP1	0.788513	4.27136	2.35046e-05	0.00252565	2.41964
MICALL2	0.429774	4.27018	2.36243e-05	0.00252565	2.41504
UPP1	0.443191	4.26901	2.37433e-05	0.00252565	2.41049
LAMB4	0.447387	4.26735	2.39142e-05	0.00253071	2.404
CAPG	0.554733	4.26482	2.41773e-05	0.00254511	2.3941
LOC115110	0.343374	4.26123	2.45535e-05	0.00254511	2.38013
DMC1	0.385026	4.26049	2.46326e-05	0.00254511	2.37722
APOBEC3F	0.435612	4.25862	2.48312e-05	0.00254511	2.36995
RAB18	-0.191111	-4.25857	2.48364e-05	0.00254511	2.36976
KLRC3	-0.7084	-4.25716	2.49876e-05	0.00254511	2.36427
SLC8A3	-0.552966	-4.25711	2.4993e-05	0.00254511	2.36407
MYBPH	0.651248	4.25666	2.5042e-05	0.00254511	2.3623
RAB2A	-0.205681	-4.25358	2.53765e-05	0.0025664	2.35029
PCGF2	-0.317874	-4.25124	2.56323e-05	0.00257146	2.34122
CAPS	0.478439	4.25084	2.5677e-05	0.00257146	2.33964
JMJD8	0.187684	4.24809	2.5982e-05	0.00258937	2.32896
HORMAD2	0.403583	4.24658	2.61513e-05	0.00259366	2.32308
ELP3	-0.11446	-4.24414	2.64275e-05	0.00260439	2.31358
DTX2	0.251437	4.24338	2.65133e-05	0.00260439	2.31064
ZNF98	-0.649867	-4.24222	2.66452e-05	0.00260489	2.30615
RPL23	-0.283359	-4.24054	2.68385e-05	0.00261135	2.29961
DACH1	-0.528556	-4.23799	2.71338e-05	0.00262762	2.28972
ARSJ	0.615355	4.23485	2.7501e-05	0.00264189	2.27756
PDLIM4	0.776409	4.23454	2.75384e-05	0.00264189	2.27633
TRUB1	-0.219839	-4.23213	2.78235e-05	0.00264732	2.26701
RASSF1	0.171965	4.23106	2.79512e-05	0.00264732	2.26287
C19orf61	0.206209	4.22902	2.81973e-05	0.00264732	2.25494
VAMP5	0.375461	4.22716	2.84224e-05	0.00264732	2.24775
CTF1	0.471251	4.22482	2.87078e-05	0.00264732	2.23871
SUPT16H	-0.1613	-4.22335	2.88891e-05	0.00264732	2.23302
FBXO17	0.66345	4.22322	2.89052e-05	0.00264732	2.23252
TET1	-0.401533	-4.22269	2.89709e-05	0.00264732	2.23047
GBF1	-0.154185	-4.22245	2.90009e-05	0.00264732	2.22953
FAM109B	0.342658	4.22231	2.90178e-05	0.00264732	2.229
PHB2	-0.185626	-4.22058	2.92334e-05	0.00264732	2.22231
SUPT3H	-0.232236	-4.21947	2.93723e-05	0.00264732	2.21802
UBQLN2	-0.142247	-4.21894	2.94392e-05	0.00264732	2.21597
FAM57B	-0.508808	-4.21856	2.94868e-05	0.00264732	2.2145
SLC43A3	0.526459	4.21796	2.95628e-05	0.00264732	2.21218
GPR157	0.37061	4.21721	2.96582e-05	0.00264732	2.20926
SEZ6L	-0.670771	-4.21511	2.99251e-05	0.00265836	2.20116
ACACB	0.425434	4.2142	3.00409e-05	0.00265836	2.19767
KHNYN	0.345825	4.21206	3.03168e-05	0.00267126	2.1894
CSMD3	-0.811822	-4.20919	3.06909e-05	0.00269189	2.17832
RPL29P2	-0.155445	-4.20783	3.08688e-05	0.00269189	2.17309
B3GNT7	0.580058	4.20726	3.09443e-05	0.00269189	2.17088
GAS2L2	0.583557	4.20439	3.13247e-05	0.00271348	2.15984
ANKRD53	0.488446	4.19593	3.24728e-05	0.00279611	2.1273
GSX2	0.628839	4.19537	3.2551e-05	0.00279611	2.12513
C11orf21	0.452966	4.19391	3.27534e-05	0.00280178	2.11953
C7orf42	0.159769	4.19292	3.2892e-05	0.00280196	2.11571
C14orf50	0.492167	4.19156	3.30821e-05	0.00280651	2.1105
HOXB3	0.878401	4.18606	3.38649e-05	0.00285736	2.08937
OPLAH	0.527942	4.1854	3.39598e-05	0.00285736	2.08684
ZXDB	-0.15875	-4.18351	3.42325e-05	0.00286854	2.07961
DENND2A	0.328906	4.18151	3.45246e-05	0.00288126	2.07193
ZNF321	0.314487	4.18009	3.4733e-05	0.00288692	2.0665
ZNF681	-0.364156	-4.17852	3.49654e-05	0.00289452	2.06047
FAM19A3	0.544611	4.17673	3.52319e-05	0.00290486	2.05361
GUF1	-0.133096	-4.17332	3.57438e-05	0.00293528	2.04058
PABPC1	-0.28026	-4.1719	3.596e-05	0.00294127	2.03513
ADAMTS20	-0.93829	-4.16785	3.65812e-05	0.00298021	2.01966
DMRTA2	0.91518	4.16537	3.6966e-05	0.00299965	2.01021
SH3BGR	0.342304	4.16282	3.73664e-05	0.00301458	2.00048
MBD2	0.170533	4.16233	3.74437e-05	0.00301458	1.99861
COG8	-0.111405	-4.16011	3.77979e-05	0.00303121	1.99011
NCRNA00219	-0.305161	-4.15257	3.90187e-05	0.00310581	1.9614
GAS5	-0.305986	-4.1525	3.90307e-05	0.00310581	1.96113
PATZ1	-0.191442	-4.14859	3.9679e-05	0.00314521	1.94625
C1QL1	-0.637541	-4.14611	4.0095e-05	0.00315404	1.93683
CAPN8	0.32373	4.14534	4.02257e-05	0.00315404	1.9339
CTTNBP2	-0.377156	-4.14519	4.02512e-05	0.00315404	1.93332
EGLN2	0.222761	4.14251	4.07086e-05	0.00317134	1.92312
GDI2	-0.156232	-4.14166	4.08538e-05	0.00317134	1.91991
SOX8	-0.549688	-4.14119	4.09355e-05	0.00317134	1.9181
NUMA1	-0.196353	-4.13693	4.16752e-05	0.00319574	1.90194
GALM	0.364206	4.13674	4.17074e-05	0.00319574	1.90124
NEK8	0.260691	4.13669	4.17175e-05	0.00319574	1.90102
VAV3	0.789555	4.13497	4.20185e-05	0.00320119	1.89453
FAM86B1	0.427099	4.13451	4.21004e-05	0.00320119	1.89277
TTC12	0.629707	4.13318	4.23359e-05	0.00320722	1.88774
SARM1	-0.218741	-4.13136	4.26605e-05	0.00321993	1.88085
TXNDC3	0.346615	4.12938	4.30177e-05	0.003235	1.87332
NOG	-0.586968	-4.12784	4.3297e-05	0.00323695	1.86748
IMP5	-0.351555	-4.12749	4.3359e-05	0.00323695	1.86619
P2RX1	0.505264	4.12572	4.36831e-05	0.00324933	1.85947
PHYHIPL	-0.37333	-4.12417	4.39683e-05	0.00325873	1.85359
PARG	-0.143949	-4.12143	4.4476e-05	0.00328451	1.84323
SORCS3	-0.478502	-4.11685	4.53361e-05	0.00333287	1.82595
CCNI	-0.207842	-4.11606	4.54873e-05	0.00333287	1.82295
RBPMS	0.413629	4.11537	4.5618e-05	0.00333287	1.82036
PLK1S1	-0.240685	-4.11323	4.60288e-05	0.00333948	1.81227
GPR85	-0.291699	-4.1132	4.60338e-05	0.00333948	1.81217
KIF9	0.282846	4.11193	4.62793e-05	0.00334547	1.80737
DAPL1	-0.777241	-4.10946	4.67594e-05	0.00336832	1.79806
CHRNA4	-0.621176	-4.10737	4.71704e-05	0.00338316	1.79017
MARCKS	-0.272813	-4.10625	4.7392e-05	0.00338316	1.78594
PYROXD2	0.526263	4.10591	4.74598e-05	0.00338316	1.78465
HNRNPA1	-0.206226	-4.10367	4.7905e-05	0.00340308	1.77623
EIF3A	-0.167139	-4.09778	4.9097e-05	0.00346136	1.75406
FGFR3	0.667439	4.09733	4.91889e-05	0.00346136	1.75237
LOC100270710	0.450863	4.09596	4.94708e-05	0.00346136	1.74722
ANKK1	0.416097	4.09551	4.95637e-05	0.00346136	1.74553
PAK7	-0.617557	-4.09535	4.95975e-05	0.00346136	1.74491
PSRC1	0.435285	4.09467	4.9737e-05	0.00346136	1.74238
SLC25A20	0.424334	4.09338	5.00051e-05	0.00346826	1.73753
SEMA6B	-0.40467	-4.09209	5.02748e-05	0.0034729	1.73268
ABCC3	1.0162	4.09144	5.04103e-05	0.0034729	1.73025
AP2B1	-0.145309	-4.09025	5.06621e-05	0.00347857	1.72576
NDST4	-0.842761	-4.08509	5.17612e-05	0.00353055	1.7064
SLC1A1	-0.444536	-4.08491	5.18011e-05	0.00353055	1.70571
ATAD1	-0.19101	-4.08428	5.1935e-05	0.00353055	1.70338
RINL	0.383741	4.0783	5.32432e-05	0.00360753	1.68095
CCDC8	0.60354	4.07736	5.34519e-05	0.00360976	1.67743
ALDH18A1	-0.178574	-4.07628	5.36912e-05	0.00361403	1.6734
TCF12	-0.372504	-4.07421	5.41543e-05	0.00363329	1.66566
PRICKLE3	0.422157	4.07181	5.46956e-05	0.00365766	1.65669
STC2	-0.656783	-4.06929	5.52718e-05	0.00368419	1.64724
ACVR2B	-0.270275	-4.06841	5.54739e-05	0.00368569	1.64396
MRPL10	-0.124429	-4.06711	5.57718e-05	0.00369353	1.63913
LOC644936	0.293997	4.06469	5.63345e-05	0.00369565	1.63008
WAC	-0.166426	-4.06322	5.6679e-05	0.00369565	1.62459
ZHX2	-0.25258	-4.06311	5.67052e-05	0.00369565	1.62417
ALPK3	0.371397	4.06308	5.67118e-05	0.00369565	1.62406
MKRN3	-0.440182	-4.06303	5.67223e-05	0.00369565	1.6239
CCDC81	0.415776	4.06235	5.68839e-05	0.00369565	1.62133
LOC283314	0.419478	4.06083	5.72409e-05	0.00370711	1.6157
BET1	0.147829	4.05957	5.75421e-05	0.00371491	1.61097
MMS19	-0.146268	-4.05861	5.77711e-05	0.003718	1.60739
LOC145837	-0.488713	-4.05694	5.81703e-05	0.00373199	1.60118
PDCD11	-0.182478	-4.05482	5.86833e-05	0.00374461	1.59327
MAPT	-0.292051	-4.05462	5.87318e-05	0.00374461	1.59253
COPZ2	0.404349	4.05332	5.9047e-05	0.00375305	1.5877
FAM171A2	-0.29865	-4.05209	5.93485e-05	0.00375529	1.58311
EMR4P	0.579881	4.05168	5.94481e-05	0.00375529	1.5816
RPL13AP6	-0.422911	-4.04989	5.98899e-05	0.00377159	1.57493
C2orf70	0.451149	4.04856	6.02187e-05	0.00378049	1.57
CNOT8	-0.11409	-4.04784	6.03994e-05	0.00378049	1.5673
RAD9B	0.197064	4.04472	6.11812e-05	0.00381778	1.55571
PIK3R2	-0.193234	-4.04293	6.16358e-05	0.00383449	1.54905
RPL21	-0.564046	-4.04213	6.18386e-05	0.00383549	1.54609
C10orf26	-0.144738	-4.03936	6.25473e-05	0.00386776	1.53582
SWAP70	0.351566	4.03736	6.30648e-05	0.00388805	1.5284
APCDD1L	0.703331	4.03382	6.39905e-05	0.00392029	1.51528
FAM22D	-0.275965	-4.03343	6.40956e-05	0.00392029	1.5138
SCN3A	-0.490049	-4.03318	6.41606e-05	0.00392029	1.51289
CRB2	0.645653	4.03227	6.43998e-05	0.00392323	1.50953
NPHP1	0.280152	4.0313	6.46592e-05	0.00392738	1.50591
APOB48R	0.415197	4.02577	6.61446e-05	0.00398847	1.48546
INA	-0.825967	-4.02514	6.63166e-05	0.00398847	1.48312
EPS8L2	0.437348	4.0248	6.64098e-05	0.00398847	1.48186
AFF2	-0.666996	-4.02468	6.64421e-05	0.00398847	1.48142
HVCN1	0.439409	4.0234	6.67927e-05	0.00398931	1.47668
HEY1	-0.306147	-4.02255	6.70247e-05	0.00398931	1.47356
MTSS1	-0.302127	-4.02212	6.71444e-05	0.00398931	1.47195
FAM190B	-0.215046	-4.02122	6.73916e-05	0.00398931	1.46864
RPL31	-0.231507	-4.02055	6.75787e-05	0.00398931	1.46615
RPL15	-0.186908	-4.02039	6.7622e-05	0.00398931	1.46557
NACA	-0.186587	-4.01941	6.78943e-05	0.0039939	1.46195
SHROOM1	0.371545	4.0179	6.83169e-05	0.00400032	1.45636
LOC254559	-0.517587	-4.01763	6.83931e-05	0.00400032	1.45536
GALNT4	0.305985	4.01491	6.91609e-05	0.00403373	1.44531
LGALS1	0.410323	4.01254	6.98345e-05	0.00406148	1.43659
ACCS	0.519018	4.00828	7.1065e-05	0.00410965	1.42086
USP43	-0.568681	-4.00819	7.10915e-05	0.00410965	1.42053
KLRC4	-0.717747	-4.0076	7.12633e-05	0.00410965	1.41836
C11orf95	-0.195278	-4.00637	7.16204e-05	0.00411288	1.41386
HOXA5	0.805612	4.00603	7.17199e-05	0.00411288	1.41261
WIPI1	0.261984	4.00432	7.2226e-05	0.00413036	1.40628
ZNF74	-0.219917	-4.0033	7.25274e-05	0.00413608	1.40253
MEX3B	-0.40121	-4.0017	7.30038e-05	0.00415171	1.39664
NBEAL2	0.292838	3.99804	7.41011e-05	0.00419221	1.38321
MINPP1	-0.164013	-3.99797	7.41243e-05	0.00419221	1.38293
HOXA3	0.820171	3.9964	7.46016e-05	0.00420761	1.37715
FAM188B	0.490903	3.99385	7.53802e-05	0.00423988	1.36781
FLJ35776	0.337228	3.99218	7.58979e-05	0.004251	1.36165
SNHG11	0.451924	3.99187	7.59921e-05	0.004251	1.36054
ANGPTL2	-0.443393	-3.98898	7.68921e-05	0.00428966	1.34994
SLC17A9	0.424212	3.98827	7.71157e-05	0.00429047	1.34733
C14orf86	0.60253	3.98742	7.73841e-05	0.00429377	1.34421
TMBIM1	0.362641	3.98594	7.78516e-05	0.00429838	1.33879
PKNOX2	-0.253415	-3.98583	7.78858e-05	0.00429838	1.33839
SVOPL	0.480455	3.98194	7.91306e-05	0.00435536	1.32413
C17orf96	-0.374274	-3.98037	7.96379e-05	0.00437157	1.31838
RRN3P2	0.379411	3.97889	8.01183e-05	0.00437503	1.31297
SATB1	-0.290905	-3.97838	8.0286e-05	0.00437503	1.31109
MEGF11	-0.553512	-3.97821	8.03402e-05	0.00437503	1.31048
DCLRE1A	-0.160367	-3.97681	8.08006e-05	0.00437595	1.30534
TUBA1C	0.441387	3.97642	8.09297e-05	0.00437595	1.30391
C6orf15	0.694405	3.97591	8.10957e-05	0.00437595	1.30207
RPS23	-0.216564	-3.97556	8.12118e-05	0.00437595	1.30078
ZNF250	-0.175154	-3.97468	8.15036e-05	0.00437595	1.29755
DGCR2	-0.202664	-3.97428	8.16362e-05	0.00437595	1.29609
FBXO18	-0.142306	-3.97173	8.24864e-05	0.00441001	1.28677
LRRTM3	-0.407097	-3.96964	8.31901e-05	0.00443609	1.27913
FRY	-0.287037	-3.96807	8.3722e-05	0.00445288	1.2734
COL9A3	0.728351	3.96548	8.46065e-05	0.00448288	1.26395
TNFAIP2	0.408522	3.96514	8.47226e-05	0.00448288	1.26272
DLL3	-0.749238	-3.96285	8.5514e-05	0.00451088	1.25436
C11orf63	0.67817	3.96209	8.57759e-05	0.00451088	1.25161
ALCAM	-0.27694	-3.9617	8.5911e-05	0.00451088	1.25019
ADAM12	0.643232	3.95959	8.66482e-05	0.0045271	1.24251
MT1L	0.463331	3.95956	8.66611e-05	0.0045271	1.24238
NFE2L3	0.340269	3.95759	8.73543e-05	0.00455173	1.23522
FCRL6	0.352707	3.95656	8.77193e-05	0.00455918	1.23147
NPNT	0.706642	3.95567	8.80347e-05	0.00456402	1.22824
RMND1	-0.138411	-3.95195	8.93709e-05	0.00462162	1.2147
CCDC19	0.67412	3.94652	9.13548e-05	0.00469622	1.19497
PTRF	0.414408	3.94621	9.14707e-05	0.00469622	1.19383
HOPX	0.532976	3.94613	9.14998e-05	0.00469622	1.19354
FAM86B2	0.540229	3.94325	9.257e-05	0.0047393	1.18309
EVC2	0.64025	3.94228	9.29326e-05	0.00474604	1.17958
TLX1	-1.08393	-3.94085	9.34715e-05	0.00476171	1.17438
SOX4	-0.475807	-3.93933	9.40482e-05	0.00477523	1.16885
EIF3E	-0.229331	-3.93855	9.43429e-05	0.00477523	1.16604
GOLGA2B	0.425804	3.93794	9.4576e-05	0.00477523	1.16382
FAM155A	-0.512056	-3.9377	9.46673e-05	0.00477523	1.16296
UBB	0.32271	3.93691	9.49676e-05	0.00477864	1.16011
COL16A1	0.434513	3.93428	9.59807e-05	0.00481781	1.15058
BIVM	-0.205808	-3.93283	9.65454e-05	0.00482645	1.14531
C20orf11	-0.10469	-3.9326	9.66337e-05	0.00482645	1.14448
ACADS	0.377777	3.93202	9.68581e-05	0.00482645	1.1424
SERPINA5	0.833321	3.92848	9.82506e-05	0.00488398	1.12958
PTPN7	0.629435	3.92668	9.8962e-05	0.00490747	1.12309
FBXL20	-0.177689	-3.92422	9.99477e-05	0.00493786	1.11419
LGALS3	0.467629	3.92243	0.000100671	0.00493786	1.10771
APOBEC3G	0.443967	3.92238	0.00010069	0.00493786	1.10754
ZNF600	0.298892	3.92236	0.000100697	0.00493786	1.10748
ITIH4	0.436893	3.92216	0.000100777	0.00493786	1.10676
FAM181A	0.780314	3.92098	0.000101258	0.00494959	1.10249
SHOX2	0.964939	3.92032	0.000101528	0.00495001	1.1001
SLITRK5	-0.408215	-3.91978	0.000101749	0.00495001	1.09815
RGN	0.58045	3.91912	0.00010202	0.00495145	1.09576
LOC100132707	0.357023	3.91842	0.000102306	0.00495365	1.09324
AMT	0.40974	3.91581	0.000103382	0.00499266	1.08385
ABI1	-0.193746	-3.91521	0.000103631	0.00499266	1.08168
TCEA3	0.5886	3.91471	0.000103842	0.00499266	1.07986
ANKRD46	-0.204677	-3.91412	0.000104086	0.00499272	1.07775
CA3	0.729269	3.91317	0.000104483	0.0050001	1.07433
RPRD2	-0.148197	-3.91158	0.000105155	0.00502052	1.06858
CDON	-0.44349	-3.91092	0.000105432	0.00502208	1.06622
RPS3A	-0.235378	-3.90592	0.000107566	0.00510896	1.04822
TAF5L	-0.151813	-3.90548	0.000107754	0.00510896	1.04666
RAB36	0.618775	3.89994	0.000110174	0.00519309	1.02672
SSFA2	0.218207	3.89971	0.000110271	0.00519309	1.02592
LPHN3	-0.301419	-3.89968	0.000110287	0.00519309	1.02579
NCOA4	-0.164746	-3.89807	0.000110998	0.00521462	1.02002
TRAPPC9	-0.137499	-3.89446	0.000112612	0.0052536	1.00707
BANK1	0.570342	3.89417	0.000112741	0.0052536	1.00604
MAST1	-0.456613	-3.89394	0.000112847	0.0052536	1.00519
TCIRG1	0.367516	3.89393	0.000112851	0.0052536	1.00516
LRGUK	0.518032	3.89199	0.000113728	0.0052773	0.998216
HILS1	0.705592	3.89139	0.000114	0.0052773	0.996068
AFAP1	-0.25192	-3.8911	0.000114132	0.0052773	0.995035
MRC2	0.459012	3.89047	0.000114421	0.00527879	0.992762
CCDC46	0.404403	3.88934	0.000114938	0.00528093	0.988714
SLC9A11	0.394068	3.88925	0.000114982	0.00528093	0.988375
C9orf44	0.710322	3.88852	0.000115314	0.00528436	0.985785
GGT8P	0.517886	3.88536	0.00011678	0.00533963	0.974447
C10orf4	-0.214388	-3.88164	0.000118521	0.0054072	0.961166
GALNS	0.163496	3.87773	0.000120383	0.00546799	0.947178
KBTBD6	-0.190997	-3.87772	0.000120386	0.00546799	0.947155
KIAA1279	-0.145374	-3.87541	0.000121501	0.00550646	0.938884
HDHD3	0.46781	3.87436	0.000122011	0.00551736	0.935131
TMEM165	0.228898	3.87177	0.000123272	0.00556095	0.925906
CD97	0.401145	3.87127	0.000123516	0.00556095	0.924128
SYNC	0.49902	3.87049	0.0001239	0.00556311	0.921347
DOK7	0.439553	3.87007	0.000124106	0.00556311	0.919854
NOD1	0.262647	3.86431	0.000126979	0.00567947	0.899329
TOM1L1	0.753423	3.8628	0.000127742	0.00570119	0.893953
RPL7	-0.229983	-3.85745	0.000130485	0.00580566	0.874901
RPUSD4	-0.145892	-3.85615	0.000131159	0.00580566	0.870284
NFIX	-0.20308	-3.85606	0.000131206	0.00580566	0.86996
GGCT	0.162307	3.85604	0.000131214	0.00580566	0.869905
C6orf48	-0.227887	-3.85125	0.000133727	0.00590412	0.852895
CAST	0.215695	3.85022	0.000134276	0.00591562	0.849224
KCNK5	0.611854	3.84386	0.000137696	0.00605331	0.826674
SAA1	0.634794	3.8404	0.000139588	0.0061234	0.814437
PRR3	-0.204129	-3.839	0.000140362	0.006142	0.809483
C3orf64	0.220437	3.83856	0.000140611	0.006142	0.807896
PRSS35	-0.615957	-3.8379	0.000140977	0.00614492	0.805565
ZEB1	-0.262613	-3.83514	0.00014252	0.00619899	0.795812
C20orf123	0.227044	3.83328	0.000143571	0.00622525	0.789226
CLGN	-0.502771	-3.833	0.00014373	0.00622525	0.788235
MTA3	-0.153936	-3.82825	0.000146446	0.00632393	0.771455
GPR1	0.610326	3.82767	0.000146778	0.00632393	0.769427
CC2D1A	0.194707	3.82694	0.000147199	0.00632393	0.766861
DNAH11	0.615741	3.82685	0.000147252	0.00632393	0.766541
C8orf83	-0.188169	-3.82634	0.000147548	0.00632393	0.764739
CD109	0.43987	3.8258	0.000147865	0.00632432	0.762815
TMEM220	0.335348	3.82405	0.000148886	0.00633884	0.756652
TMEM8B	-0.15254	-3.82322	0.000149371	0.00633884	0.753739
DIP2C	-0.190588	-3.8232	0.000149386	0.00633884	0.753645
NFKBIB	0.248099	3.8228	0.000149617	0.00633884	0.752265
PTCD3	-0.119033	-3.82229	0.000149919	0.00633884	0.750454
TRPM8	0.830236	3.82206	0.000150057	0.00633884	0.749629
TLE3	-0.208498	-3.81992	0.000151326	0.00637169	0.742089
KLHL28	-0.220499	-3.8197	0.000151456	0.00637169	0.74132
FGF12	-0.400762	-3.81779	0.000152595	0.00639451	0.734603
PGAM4	-0.209925	-3.81741	0.000152823	0.00639451	0.733267
ALS2CR12	0.414949	3.81723	0.000152933	0.00639451	0.732626
MLLT11	-0.290667	-3.81592	0.000153723	0.00641449	0.728009
LOC407835	-0.163512	-3.81431	0.000154695	0.00644197	0.722362
LRRTM4	-0.530064	-3.81368	0.000155082	0.006445	0.720125
P2RY2	0.479544	3.81201	0.000156098	0.00647411	0.714277
CLCF1	0.563032	3.80977	0.000157481	0.00651831	0.706375
NKX2-5	0.698303	3.80831	0.000158382	0.00654241	0.701266
CYP27A1	0.467795	3.80769	0.000158766	0.00654512	0.699096
CA5B	0.266348	3.80487	0.000160533	0.00660469	0.689185
C20orf199	-0.253359	-3.80371	0.000161262	0.00662143	0.685125
MAPKAPK5	0.0913794	3.80267	0.000161925	0.00662582	0.681453
PSMC2	0.12083	3.80253	0.000162015	0.00662582	0.680957
HCN3	-0.287429	-3.80176	0.000162503	0.0066326	0.678259
INTS4	-0.142216	-3.80073	0.000163161	0.0066462	0.674646
P2RY6	0.44157	3.79801	0.000164904	0.00668759	0.665127
ITGB7	0.455175	3.79766	0.000165131	0.00668759	0.663896
GNE	-0.164746	-3.79717	0.000165448	0.00668759	0.662182
FEZF1	0.547011	3.79669	0.00016576	0.00668759	0.660495
MYL12A	0.303982	3.79579	0.000166342	0.00668759	0.657357
RHOQ	0.190682	3.79567	0.000166424	0.00668759	0.656916
GRID2	-0.615236	-3.79561	0.000166457	0.00668759	0.656738
CCDC152	0.449617	3.79454	0.000167156	0.00670255	0.652987
SMC3	-0.194216	-3.79333	0.000167951	0.00670998	0.648737
SFRS13B	-0.218712	-3.79326	0.000167995	0.00670998	0.648504
CLEC18A	0.465064	3.78889	0.000170886	0.00679925	0.633229
PAG1	-0.218687	-3.78889	0.000170892	0.00679925	0.633197
CLCN2	0.239319	3.7876	0.000171753	0.0068203	0.628698
CBLN1	-0.658273	-3.7871	0.000172087	0.00682036	0.62696
ARMC10	0.119618	3.78644	0.00017253	0.00682475	0.624658
RFX7	-0.228168	-3.78523	0.000173346	0.00684385	0.620433
ACAA2	0.337373	3.78249	0.000175212	0.00690422	0.610854
RILP	0.264496	3.78167	0.00017577	0.00691295	0.608006
HMGA2	0.642756	3.77986	0.000177015	0.00694136	0.601689
ZNF804A	-0.488346	-3.77964	0.000177169	0.00694136	0.600914
CCDC109B	0.490179	3.77876	0.000177776	0.00695189	0.597852
WHAMML2	0.32249	3.77527	0.000180212	0.00703375	0.585673
KCNK3	-0.671332	-3.77423	0.000180939	0.00704872	0.582071
ERMAP	0.231347	3.77309	0.000181746	0.00706676	0.578088
TXNL4B	0.161857	3.77225	0.000182344	0.00707204	0.57515
SOX1	-0.449012	-3.77193	0.000182571	0.00707204	0.574037
FGF1	0.459152	3.77117	0.000183107	0.00707317	0.571415
INSL5	0.262435	3.77092	0.000183289	0.00707317	0.570524
DOK1	0.258815	3.76843	0.000185068	0.00712841	0.561884
FAM65C	0.492824	3.76678	0.000186262	0.00715827	0.556132
FAM175B	-0.119709	-3.76639	0.00018654	0.00715827	0.554794
FABP5	0.683179	3.76525	0.000187373	0.00717682	0.550809
PHF11	0.342032	3.7632	0.000188867	0.00722057	0.543705
STAM	-0.167208	-3.76141	0.000190185	0.00723725	0.537488
CAMLG	-0.169478	-3.76138	0.000190212	0.00723725	0.53736
2020-03-08	-0.393962	-3.76117	0.000190361	0.00723725	0.536658
STARD10	-0.254555	-3.75882	0.000192106	0.00728665	0.528498
ATCAY	-0.586954	-3.75847	0.00019237	0.00728665	0.527267
DDIT4L	0.847204	3.75764	0.000192988	0.00729287	0.524399
GDAP1L1	-0.530364	-3.75695	0.000193504	0.00729287	0.52201
LRIT2	-0.517311	-3.75616	0.000194099	0.00729287	0.519268
LOC113230	0.286791	3.75599	0.000194229	0.00729287	0.518666
YIPF1	0.179275	3.75543	0.000194649	0.00729287	0.516735
GALNT13	-0.588953	-3.75504	0.000194941	0.00729287	0.515393
CBR1	0.526184	3.75494	0.000195021	0.00729287	0.515027
PVRL1	-0.316283	-3.75288	0.000196585	0.007338	0.507883
R3HDM2	-0.137069	-3.75226	0.000197059	0.00734233	0.505731
ZNF195	-0.186107	-3.75158	0.000197576	0.00734826	0.503387
LECT1	0.701039	3.75026	0.000198587	0.00737248	0.498826
SLC2A10	0.50004	3.7477	0.00020057	0.00743266	0.489942
VASN	0.600726	3.74721	0.000200945	0.00743314	0.488272
MAP3K14	0.226563	3.74383	0.000203589	0.00748748	0.476584
EEF1G	-0.249898	-3.74343	0.000203908	0.00748748	0.475183
SHROOM3	0.624938	3.74341	0.000203925	0.00748748	0.475108
C13orf18	0.478879	3.74317	0.000204114	0.00748748	0.47428
TRIM6	0.419106	3.74301	0.000204237	0.00748748	0.473741
COL22A1	0.956249	3.74141	0.000205504	0.00751392	0.468215
C21orf63	0.407219	3.74118	0.00020569	0.00751392	0.467403
C9orf89	0.382784	3.73948	0.000207043	0.00754947	0.461544
MXI1	-0.22303	-3.73903	0.000207399	0.00754947	0.460008
LASS1	0.274894	3.73751	0.000208625	0.00757112	0.454738
GABRA3	-0.642482	-3.73706	0.000208984	0.00757112	0.453202
MATR3	-0.102617	-3.73692	0.0002091	0.00757112	0.452707
SPAST	-0.124754	-3.73528	0.000210429	0.00760582	0.447044
TMEM150A	0.169749	3.73301	0.000212279	0.0076592	0.439221
ADAMTS5	-0.393783	-3.73209	0.000213031	0.00767286	0.436059
ARMCX1	-0.141446	-3.72984	0.000214888	0.00772207	0.428302
TCF7L2	-0.184281	-3.72952	0.00021515	0.00772207	0.427216
ACBD6	-0.133454	-3.72863	0.000215889	0.00773508	0.424151
MTAP	-0.245449	-3.72729	0.00021701	0.00775487	0.419523
CEP170L	-0.312966	-3.7269	0.000217337	0.00775487	0.418175
TUBB2C	0.22252	3.72635	0.000217795	0.00775487	0.416296
HSD3B7	0.316146	3.72617	0.000217952	0.00775487	0.41565
EIF4EBP2	-0.144034	-3.72493	0.000218994	0.00775632	0.411391
KIF13A	-0.266257	-3.72485	0.000219061	0.00775632	0.411117
SNTG1	-0.533383	-3.72477	0.000219127	0.00775632	0.41085
FKBP9	0.365998	3.72348	0.000220213	0.00778138	0.406428
FOXJ2	-0.134192	-3.72265	0.000220919	0.0077929	0.40357
TAX1BP3	0.213229	3.72099	0.000222337	0.0078207	0.397855
HRASLS2	0.257839	3.7203	0.000222932	0.0078207	0.395468
DEDD2	0.27859	3.7202	0.00022301	0.0078207	0.395152
PLEKHA4	0.570354	3.71995	0.000223231	0.0078207	0.394269
MORF4	-0.199138	-3.71938	0.000223718	0.0078244	0.392323
TRIP10	0.317619	3.71838	0.000224578	0.00784112	0.388896
ITGAX	0.462113	3.717	0.000225775	0.00786955	0.384145
C14orf142	0.1655	3.71629	0.000226393	0.00787772	0.381702
?|653553	0.419714	3.7152	0.000227338	0.00789722	0.37798
MRPL44	-0.0889615	-3.71412	0.000228291	0.00790799	0.374247
LRRC69	0.20884	3.71392	0.000228462	0.00790799	0.373578
SSBP2	0.26686	3.71353	0.000228804	0.00790799	0.372241
ANXA1	0.690658	3.71122	0.000230845	0.00795516	0.364307
SUSD4	-0.336321	-3.71111	0.000230944	0.00795516	0.363926
SLC2A4RG	0.251725	3.70887	0.000232937	0.00801039	0.356249
DPP4	0.516509	3.70748	0.000234183	0.00803976	0.351486
TBPL1	-0.177487	-3.70694	0.000234663	0.00804279	0.349657
SHISA7	-0.476822	-3.70518	0.000236252	0.00808375	0.34363
PSENEN	0.224617	3.70394	0.000237379	0.00810882	0.339379
SQRDL	0.349181	3.70276	0.000238455	0.00813201	0.335343
DSCAM	-0.426601	-3.70221	0.000238959	0.00813571	0.333456
LSP1	0.574926	3.70085	0.000240207	0.00816102	0.328804
CAPN12	0.331102	3.70053	0.000240498	0.00816102	0.327725
ZNF687	-0.113862	-3.70007	0.000240923	0.00816195	0.326149
PDGFA	0.402404	3.69863	0.000242259	0.00819371	0.321208
LGALS9C	0.405529	3.69679	0.000243971	0.00823457	0.314921
ATE1	-0.322364	-3.69642	0.000244314	0.00823457	0.313666
DUSP26	-0.387938	-3.69604	0.000244671	0.00823457	0.312366
KHDRBS3	-0.223258	-3.69551	0.000245166	0.00823775	0.310558
TLK2	-0.0892115	-3.69479	0.000245839	0.00824686	0.308112
HNRNPA0	-0.113911	-3.69353	0.000247032	0.00827336	0.30379
SLC35A2	0.111721	3.69238	0.000248117	0.00829616	0.299879
HNRNPUL2	-0.107955	-3.68571	0.000254517	0.00849632	0.277146
IFT57	0.167136	3.68429	0.000255902	0.00852869	0.272301
ASCC1	-0.171497	-3.68325	0.000256922	0.0085429	0.268753
ZRANB1	-0.165521	-3.683	0.000257161	0.0085429	0.267923
HPS1	0.326703	3.68199	0.000258152	0.00856196	0.264491
NUDT16	0.314207	3.67944	0.000260674	0.00863166	0.255815
GLRA3	-0.788932	-3.67826	0.000261848	0.00865657	0.251806
PLAT	0.532578	3.67781	0.000262304	0.00865773	0.25025
CEACAM1	0.363018	3.67733	0.00026278	0.00865951	0.248633
RAB9B	-0.357553	-3.67644	0.000263673	0.008675	0.245608
CXXC4	-0.433747	-3.67498	0.000265143	0.00870943	0.240645
GPR173	-0.290077	-3.67422	0.000265909	0.0087101	0.238072
KLHDC7A	0.514765	3.67412	0.000266012	0.0087101	0.237725
CSRP2BP	-0.0929709	-3.67227	0.00026789	0.00874866	0.23145
ARL3	-0.191038	-3.67212	0.000268042	0.00874866	0.230943
AFF3	-0.310205	-3.67107	0.000269114	0.00876971	0.227382
ARL9	0.51908	3.66983	0.000270391	0.00879733	0.223161
LOC729234	0.439922	3.66863	0.00027163	0.00882367	0.219082
CDR1	-0.545262	-3.66805	0.00027223	0.00882919	0.217114
COL9A2	0.45554	3.6676	0.000272692	0.00883023	0.2156
PSMD9	0.136137	3.66678	0.000273544	0.00884388	0.212817
DGKB	-0.475952	-3.66585	0.000274509	0.00885885	0.209678
MAGEH1	-0.242513	-3.66551	0.00027487	0.00885885	0.208503
RLN2	0.267611	3.66431	0.000276123	0.00888529	0.204445
FAH	0.3148	3.66084	0.000279781	0.00898889	0.192709
FAM180B	0.522412	3.65941	0.000281311	0.00901259	0.187845
EYA4	0.75156	3.65873	0.000282031	0.00901259	0.185564
KDM4D	-0.149554	-3.65873	0.000282037	0.00901259	0.185546
RIN1	0.504584	3.6585	0.000282275	0.00901259	0.184795
FLJ36777	0.28834	3.65769	0.000283152	0.00902658	0.182027
S100A11	0.448154	3.65723	0.000283638	0.00902805	0.180497
EIF3F	-0.19351	-3.65616	0.000284798	0.00905093	0.176859
C13orf26	0.678253	3.65479	0.000286277	0.00907763	0.17224
MED10	0.132538	3.65456	0.000286522	0.00907763	0.171476
C22orf40	0.147439	3.65301	0.000288218	0.00911729	0.166214
CXorf40A	0.209982	3.65143	0.000289942	0.0091577	0.160898
GALNT5	0.608135	3.6501	0.00029141	0.00918549	0.156394
PLCB1	-0.362086	-3.64982	0.000291717	0.00918549	0.155456
PLK3	0.281813	3.64845	0.000293234	0.00921912	0.150832
EEPD1	-0.408836	-3.64713	0.000294704	0.0092479	0.146371
PTCH1	-0.364942	-3.64671	0.000295165	0.0092479	0.144979
RPL6	-0.197403	-3.64641	0.0002955	0.0092479	0.143967
TFAM	-0.129179	-3.64579	0.000296199	0.00925564	0.141863
TRMU	0.172288	3.64524	0.000296818	0.00926091	0.14
OTOS	0.648878	3.64426	0.000297923	0.00928127	0.136688
WASF1	-0.317471	-3.64354	0.000298728	0.00929226	0.134282
HP	0.646994	3.64213	0.000300322	0.0093277	0.129539
SERPING1	0.500478	3.64139	0.000301169	0.00933987	0.127029
ZAK	0.30837	3.64041	0.00030228	0.00936019	0.123747
CDK5R1	-0.380005	-3.63437	0.000309256	0.009527	0.103412
LINGO1	-0.390467	-3.63423	0.000309417	0.009527	0.102948
FBXO10	-0.143411	-3.63409	0.000309577	0.009527	0.102487
LMO2	0.309453	3.63357	0.000310187	0.009527	0.100735
ARMC1	-0.154619	-3.63334	0.000310456	0.009527	0.0999599
USP11	-0.164008	-3.63305	0.000310796	0.009527	0.0989842
SAP130	-0.101919	-3.63258	0.000311355	0.009527	0.097384
CEP57	-0.14529	-3.63237	0.000311591	0.009527	0.096708
PQLC2	0.177736	3.63216	0.000311843	0.009527	0.0959881
CECR6	-0.276279	-3.62977	0.000314669	0.00959904	0.0879504
DDB2	0.301214	3.62889	0.000315715	0.00961665	0.0849942
HOXA4	0.760983	3.62829	0.000316418	0.00962381	0.08301
RGS22	0.705677	3.62763	0.000317215	0.00963376	0.0807696
LOC729156	0.385146	3.6272	0.00031773	0.00963514	0.0793256
SBK1	-0.271152	-3.62561	0.000319637	0.00965801	0.0739925
ASB13	-0.205672	-3.62513	0.000320211	0.00965801	0.0723938
PLS3	0.277946	3.62496	0.000320413	0.00965801	0.0718319
SNX9	0.252639	3.62496	0.000320414	0.00965801	0.0718302
DDX42	-0.088694	-3.62384	0.000321767	0.00965801	0.0680765
LRRN1	-0.351413	-3.6238	0.000321819	0.00965801	0.0679328
UNG	0.147558	3.62333	0.000322389	0.00965801	0.0663561
GRIK2	-0.416919	-3.62316	0.000322598	0.00965801	0.0657777
FAM183A	0.613901	3.62306	0.000322718	0.00965801	0.0654475
UQCRC2	-0.128319	-3.62219	0.000323771	0.00966842	0.0625444
LDB1	-0.186435	-3.622	0.000324007	0.00966842	0.0618946
ZBP1	0.49689	3.62134	0.00032481	0.0096783	0.0596907
TLX1NB	-0.824107	-3.62053	0.000325806	0.00969392	0.056962
BCAR1	-0.209901	-3.61875	0.000327994	0.00974488	0.0510018
SLC16A11	0.455783	3.61806	0.000328835	0.00975577	0.0487193
MSN	0.401524	3.61759	0.000329424	0.00975911	0.0471276
PRMT5	-0.150281	-3.60938	0.000339727	0.0100499	0.0196981
CRMP1	-0.249823	-3.60891	0.000340331	0.0100532	0.0181165
VSIG8	0.273933	3.60799	0.000341502	0.0100584	0.0150595
MOBKL2C	0.218112	3.6076	0.000342003	0.0100584	0.0137521
EEF1A1P9	-0.200678	-3.6073	0.000342396	0.0100584	0.0127301
OCIAD2	0.557079	3.60724	0.000342471	0.0100584	0.0125368
WIT1	0.387839	3.60659	0.000343303	0.0100584	0.0103754
NOLC1	-0.111386	-3.60648	0.000343445	0.0100584	0.010007
NALCN	-0.315969	-3.60453	0.000345964	0.0101111	0.00350093
TTC38	0.272172	3.60398	0.000346672	0.0101111	0.00167932
MYOD1	-0.703791	-3.60394	0.000346724	0.0101111	0.00154717
LILRA4	0.674993	3.60064	0.000351047	0.0101968	-0.00948531
SEMA3B	0.351673	3.60019	0.000351628	0.0101968	-0.0109578
NRXN2	-0.25823	-3.59937	0.000352708	0.0101968	-0.0136867
BMP4	-0.355762	-3.59922	0.000352914	0.0101968	-0.0142058
FAM178B	0.561432	3.59899	0.000353221	0.0101968	-0.0149801
TREML1	0.43878	3.59881	0.000353452	0.0101968	-0.0155619
CS	-0.109254	-3.59845	0.000353929	0.0101968	-0.0167639
TXLNB	0.579484	3.59824	0.000354213	0.0101968	-0.0174782
MGC2752	0.159701	3.59795	0.000354594	0.0101968	-0.0184346
CD101	0.445865	3.59783	0.000354748	0.0101968	-0.0188215
SMPD3	-0.377156	-3.59742	0.00035529	0.0101968	-0.0201794
TP53INP2	0.292814	3.59717	0.000355622	0.0101968	-0.0210103
B3GALNT2	0.18206	3.59665	0.000356325	0.0102027	-0.022769
C9orf64	0.440431	3.59595	0.000357249	0.0102149	-0.0250745
C16orf55	0.173453	3.59552	0.000357833	0.0102174	-0.0265272
LNP1	-0.200553	-3.59237	0.000362065	0.0103101	-0.0369935
ASL	0.19232	3.59236	0.000362083	0.0103101	-0.0370367
C6orf174	-0.309795	-3.59143	0.000363336	0.0103303	-0.0401109
PMP22	0.312769	3.59109	0.000363798	0.0103303	-0.0412426
DCAF7	-0.143405	-3.5895	0.000365966	0.0103775	-0.0465299
ELAVL2	-0.562937	-3.58891	0.000366774	0.010386	-0.048493
PLA2G16	0.381465	3.58757	0.00036861	0.0104237	-0.0529379
TRMT61A	0.155986	3.58652	0.000370056	0.0104432	-0.0564213
IGFBP2	0.665491	3.58633	0.000370318	0.0104432	-0.0570503
LOC100129534	0.26636	3.58501	0.000372155	0.0104652	-0.0614545
LOC642852	-0.231139	-3.58496	0.000372226	0.0104652	-0.0616241
XKR7	-0.753869	-3.58467	0.000372628	0.0104652	-0.0625846
RPS3	-0.246964	-3.58326	0.000374592	0.010506	-0.0672619
C20orf134	0.310747	3.58279	0.000375241	0.0105098	-0.0688004
PRKG2	-0.712573	-3.58216	0.000376125	0.0105175	-0.0708943
CAMSAP1L1	-0.182934	-3.58186	0.000376541	0.0105175	-0.0718795
TAS2R13	-0.140353	-3.58084	0.000377986	0.0105323	-0.0752865
C9orf125	-0.414379	-3.58076	0.000378094	0.0105323	-0.0755413
ZKSCAN4	-0.135912	-3.58	0.000379167	0.0105371	-0.0780626
NAALADL1	0.267114	3.57991	0.000379293	0.0105371	-0.0783575
ELMO1	-0.278777	-3.57871	0.000380988	0.0105592	-0.0823248
COL8A1	0.737139	3.57832	0.000381551	0.0105592	-0.0836377
LOC100132831	-0.183915	-3.57826	0.000381634	0.0105592	-0.0838322
VRK2	0.366844	3.57714	0.000383226	0.010589	-0.0875336
PARP10	0.300678	3.57567	0.000385332	0.0106329	-0.0924093
PEX5	-0.121885	-3.57501	0.000386273	0.0106381	-0.0945782
CCT3	-0.136045	-3.57473	0.000386671	0.0106381	-0.0954952
HSPB1	0.389807	3.57412	0.000387557	0.0106381	-0.097532
GNAI1	-0.289975	-3.57409	0.000387595	0.0106381	-0.0976178
EIF2A	-0.165813	-3.57304	0.000389111	0.0106521	-0.101091
MAPK8	-0.305072	-3.57302	0.000389143	0.0106521	-0.101164
ACSS3	0.547663	3.57195	0.000390691	0.0106689	-0.104694
RPS24	-0.232167	-3.57173	0.00039102	0.0106689	-0.105443
HOXA2	0.645255	3.57152	0.000391316	0.0106689	-0.106117
C2orf39	0.780326	3.57074	0.000392453	0.0106795	-0.108697
IGSF21	-0.351573	-3.57054	0.000392742	0.0106795	-0.109353
YEATS2	-0.140728	-3.56989	0.000393704	0.0106836	-0.111529
HSPC072	-0.36426	-3.56973	0.000393936	0.0106836	-0.112051
MGC57346	-0.158826	-3.56922	0.000394674	0.0106855	-0.113716
CDC42BPG	0.348669	3.56897	0.000395044	0.0106855	-0.11455
ASAH2B	-0.453345	-3.56674	0.000398333	0.0107602	-0.121922
TTLL12	-0.195129	-3.56624	0.000399075	0.010763	-0.123578
TRIM13	-0.143622	-3.56596	0.000399484	0.010763	-0.124489
ZFP37	-0.202705	-3.56453	0.000401612	0.0107948	-0.129214
ABL2	-0.137914	-3.56433	0.000401914	0.0107948	-0.129881
SPATA18	0.578037	3.56411	0.000402243	0.0107948	-0.130609
FXYD1	0.695615	3.56301	0.000403892	0.0108249	-0.134248
OTP	0.661641	3.56199	0.000405425	0.0108519	-0.137615
ROBLD3	0.178039	3.56009	0.000408283	0.0108666	-0.143861
C15orf56	0.313778	3.56006	0.000408328	0.0108666	-0.143959
ASF1A	-0.156444	-3.55952	0.000409144	0.0108666	-0.145735
CCDC153	0.381534	3.55951	0.00040916	0.0108666	-0.145768
RAB3C	-0.598852	-3.55948	0.000409203	0.0108666	-0.145862
OSBPL8	-0.196532	-3.55915	0.00040971	0.0108666	-0.146964
AGR3	0.405151	3.55914	0.000409718	0.0108666	-0.14698
ALDH3A1	0.528187	3.55862	0.000410518	0.0108666	-0.148716
MYO5C	0.407325	3.55847	0.00041074	0.0108666	-0.149196
GRIK4	-0.247708	-3.55791	0.0004116	0.0108753	-0.151055
HIST2H3C	-0.386734	-3.55703	0.000412945	0.0108855	-0.153955
PNKP	0.18958	3.55675	0.000413371	0.0108855	-0.154873
ITGA7	0.344777	3.55662	0.000413574	0.0108855	-0.15531
SPATS2	-0.196632	-3.55309	0.000419007	0.0110144	-0.166911
MEX3A	-0.387348	-3.55188	0.000420895	0.0110498	-0.170907
TUSC3	-0.345866	-3.54992	0.000423952	0.0111072	-0.17734
EIF4E	0.115714	3.54979	0.000424161	0.0111072	-0.177777
LBXCOR1	-0.287992	-3.54744	0.000427865	0.0111899	-0.185506
JPH3	-0.575226	-3.54679	0.00042889	0.0112024	-0.187632
HPDL	0.330546	3.54522	0.000431379	0.0112531	-0.192775
B9D2	0.257216	3.54377	0.000433703	0.0112979	-0.197548
AFP	0.370275	3.54335	0.000434368	0.0112979	-0.19891
EEF1B2	-0.184805	-3.54312	0.000434745	0.0112979	-0.19968
HSF2BP	-0.355774	-3.54194	0.000436646	0.0113254	-0.203558
GNG4	-0.354265	-3.54178	0.000436909	0.0113254	-0.204093
CD274	0.453231	3.54087	0.000438367	0.0113489	-0.207053
CRB1	-0.337132	-3.5399	0.000439949	0.0113677	-0.210254
NCOR2	-0.184999	-3.53974	0.000440202	0.0113677	-0.210765
POSTN	1.06136	3.53857	0.00044211	0.0114027	-0.214608
HPD	0.681807	3.53694	0.00044477	0.0114386	-0.219938
GPR114	0.490662	3.53676	0.000445066	0.0114386	-0.220528
RAB27A	0.272079	3.5367	0.000445174	0.0114386	-0.220744
TACR1	-0.639802	-3.53598	0.000446349	0.0114486	-0.223085
SKIV2L2	-0.105844	-3.53556	0.000447042	0.0114486	-0.224463
ZMIZ1	-0.203679	-3.53544	0.000447236	0.0114486	-0.224849
ZNF695	-0.3917	-3.53415	0.000449369	0.0114884	-0.229076
OSBPL3	0.324107	3.53383	0.00044991	0.0114884	-0.230144
SH3GL2	-0.541669	-3.53344	0.000450554	0.0114905	-0.231415
GDPD1	-0.250659	-3.53149	0.000453795	0.0115254	-0.237782
FAM123C	-0.782945	-3.53116	0.000454356	0.0115254	-0.238881
ABCB8	0.145377	3.53096	0.000454678	0.0115254	-0.239509
LRRTM2	-0.337412	-3.5305	0.000455459	0.0115254	-0.241034
CHMP7	-0.0806952	-3.53048	0.000455495	0.0115254	-0.241104
IPO7	-0.175508	-3.53043	0.000455573	0.0115254	-0.241255
RCOR3	-0.10955	-3.53027	0.000455849	0.0115254	-0.241795
RPL30	-0.220216	-3.52898	0.000458006	0.0115656	-0.245987
IRAK2	0.359922	3.52788	0.000459874	0.0115853	-0.249601
TEAD3	0.421131	3.52774	0.000460112	0.0115853	-0.250061
CPEB3	-0.273021	-3.52726	0.000460915	0.0115853	-0.25161
NFKBIZ	0.348134	3.52719	0.000461044	0.0115853	-0.251859
SUGT1P1	-0.261151	-3.52547	0.00046396	0.0116378	-0.257458
RPL26	-0.202167	-3.5253	0.000464263	0.0116378	-0.258038
MTPAP	-0.1552	-3.52373	0.000466935	0.0116803	-0.263135
G0S2	0.65557	3.52347	0.000467386	0.0116803	-0.263992
HIST3H2BB	-0.311801	-3.52313	0.000467979	0.0116803	-0.265118
PIWIL4	0.482192	3.52298	0.000468235	0.0116803	-0.265604
FMR1NB	-0.0983722	-3.52061	0.00047233	0.0117543	-0.273335
NARS2	-0.117301	-3.5206	0.000472346	0.0117543	-0.273366
TC2N	0.592097	3.51875	0.000475559	0.0118092	-0.279386
GAB3	0.295604	3.51867	0.000475705	0.0118092	-0.279658
CLASP2	-0.183829	-3.51761	0.000477566	0.0118411	-0.283124
C22orf15	0.277812	3.51634	0.000479799	0.0118612	-0.287266
XAF1	0.389603	3.5163	0.000479858	0.0118612	-0.287376
B3GNT8	0.333385	3.51616	0.000480112	0.0118612	-0.287845
MAB21L2	0.453643	3.51525	0.000481711	0.0118775	-0.290797
LOC283761	-0.516342	-3.51513	0.000481926	0.0118775	-0.291194
CCDC125	0.280482	3.5148	0.000482507	0.0118775	-0.292263
LRRC61	0.537422	3.51289	0.000485905	0.0119469	-0.298494
MSL2	-0.110416	-3.51237	0.000486821	0.0119551	-0.300166
SAMD9L	0.408728	3.51173	0.000487973	0.0119559	-0.302264
PARP12	0.317586	3.51145	0.000488475	0.0119559	-0.303176
ANXA2	0.46474	3.51138	0.000488603	0.0119559	-0.303409
MFF	-0.115472	-3.51082	0.000489605	0.0119662	-0.305227
KIDINS220	-0.14837	-3.50802	0.000494649	0.0120607	-0.314326
BCAN	-0.426482	-3.5073	0.000495962	0.0120607	-0.316679
CLEC18B	0.542794	3.50687	0.000496733	0.0120607	-0.318056
SNAPC3	-0.142747	-3.50683	0.000496819	0.0120607	-0.31821
SLC27A1	0.221554	3.50673	0.000496995	0.0120607	-0.318524
C1orf25	-0.115657	-3.50673	0.000496999	0.0120607	-0.318531
WISP1	0.60126	3.50533	0.000499548	0.0121083	-0.323073
PPCDC	0.178218	3.50351	0.000502893	0.0121498	-0.328994
EDDM3A	0.153753	3.5035	0.00050291	0.0121498	-0.329025
GPR108	0.129377	3.5031	0.000503636	0.0121498	-0.330305
LOC442454	-0.222649	-3.50309	0.000503659	0.0121498	-0.330346
PTCRA	0.477912	3.50279	0.000504221	0.0121498	-0.331335
CLEC7A	0.470325	3.49969	0.000509961	0.0122737	-0.34138
F3	0.472709	3.49874	0.000511735	0.012302	-0.344462
DNAJC25	0.150898	3.49828	0.000512598	0.0123083	-0.345956
PPP1R1C	0.473409	3.4956	0.000517648	0.0124081	-0.354655
COL8A2	0.495889	3.49543	0.000517959	0.0124081	-0.355188
SCRT1	-0.723384	-3.49185	0.000524765	0.0125564	-0.36677
FXYD6	-0.336138	-3.49058	0.000527202	0.0125862	-0.37088
ZNF253	-0.191151	-3.49057	0.000527235	0.0125862	-0.370934
KCTD14	0.315745	3.48961	0.000529086	0.0126052	-0.374044
EXOC2	-0.101855	-3.48952	0.000529257	0.0126052	-0.374331
HSF2	-0.137435	-3.4889	0.000530456	0.0126191	-0.376338
PARVB	0.254237	3.48851	0.000531201	0.0126222	-0.377582
PCCA	-0.148054	-3.48741	0.000533335	0.0126474	-0.381138
ORAI2	0.167823	3.48733	0.000533496	0.0126474	-0.381406
RNF139	-0.121904	-3.4865	0.000535112	0.0126711	-0.384089
MAML2	-0.373621	-3.48553	0.000537007	0.0126975	-0.387225
PODXL2	-0.25359	-3.4853	0.000537462	0.0126975	-0.387976
LTBR	0.294161	3.48428	0.000539452	0.0127187	-0.391254
TNFSF14	0.346527	3.48365	0.0005407	0.0127187	-0.393303
DLGAP1	-0.426841	-3.48347	0.000541051	0.0127187	-0.393879
S100A6	0.383607	3.48339	0.000541213	0.0127187	-0.394143
DNPEP	0.1138	3.48298	0.000542007	0.0127187	-0.395443
SPRY2	0.286292	3.48295	0.000542079	0.0127187	-0.395561
PLA2G2A	0.716	3.4821	0.000543747	0.0127433	-0.398286
CYB5R2	0.657976	3.48137	0.000545204	0.0127569	-0.400658
POLR2F	-0.276944	-3.48118	0.000545571	0.0127569	-0.401256
TNFRSF21	-0.269965	-3.48022	0.000547493	0.0127873	-0.404375
ZNF510	-0.158455	-3.47923	0.000549473	0.012819	-0.407575
ARHGEF1	0.236822	3.47719	0.000553551	0.0128994	-0.414132
ASGR1	-0.294912	-3.47624	0.000555475	0.012926	-0.417208
ZNF711	-0.228528	-3.476	0.000555952	0.012926	-0.417969
COX6A2	0.336195	3.47502	0.000557947	0.0129578	-0.421146
MUTYH	0.17664	3.47464	0.000558705	0.0129604	-0.422349
ACAP1	0.39693	3.47434	0.000559322	0.0129604	-0.423328
CRELD2	0.165509	3.47213	0.00056382	0.0130381	-0.430429
EDC3	-0.115592	-3.47204	0.00056402	0.0130381	-0.430742
UBAP2	-0.152417	-3.47176	0.000564581	0.0130381	-0.431625
SH3BGRL3	0.207593	3.47023	0.000567731	0.0130823	-0.436556
MAGEL2	-0.366507	-3.47021	0.000567769	0.0130823	-0.436616
JPH4	-0.440666	-3.46986	0.000568498	0.0130844	-0.437753
MT3	0.470478	3.46942	0.000569396	0.0130904	-0.439153
LOC100128977	-0.420231	-3.46832	0.000571675	0.0131264	-0.442693
MTHFS	0.216833	3.46805	0.000572241	0.0131264	-0.44357
C16orf62	-0.0849622	-3.46583	0.00057686	0.0131954	-0.450696
NEK6	0.285547	3.46582	0.000576892	0.0131954	-0.450746
ZNF470	0.162673	3.46568	0.000577176	0.0131954	-0.451182
MPL	0.393805	3.465	0.000578599	0.0132132	-0.453363
TICAM2	0.368175	3.46438	0.000579913	0.0132285	-0.455374
DPY19L1	0.255521	3.46381	0.000581114	0.0132307	-0.457207
RPL23A	-0.177372	-3.46372	0.000581298	0.0132307	-0.457488
KIAA1024	-0.277335	-3.46175	0.00058547	0.0133108	-0.463826
SEC61G	0.373875	3.4608	0.00058748	0.0133145	-0.466863
SIAH1	-0.113772	-3.46077	0.000587535	0.0133145	-0.466946
C19orf35	0.372353	3.46075	0.000587574	0.0133145	-0.467005
PELI1	-0.185724	-3.45993	0.000589323	0.0133394	-0.469639
GPAT2	0.441621	3.45941	0.000590435	0.0133498	-0.47131
P2RX4	0.20426	3.45857	0.000592246	0.013376	-0.474023
NOL4	-0.276082	-3.45775	0.000593996	0.0134008	-0.476637
LRRC4C	-0.283443	-3.45708	0.000595438	0.0134186	-0.478786
RPL22	-0.190372	-3.4554	0.000599067	0.0134856	-0.48417
NOMO1	-0.123322	-3.45464	0.00060072	0.013508	-0.486612
SS18	0.116902	3.45327	0.000603703	0.0135602	-0.491
CHD3	-0.193858	-3.45261	0.000605154	0.0135779	-0.493127
DUSP19	-0.180818	-3.45167	0.000607207	0.0136091	-0.496126
E2F4	0.0998543	3.44943	0.000612135	0.0136782	-0.503287
APPBP2	-0.112229	-3.44942	0.000612164	0.0136782	-0.503329
SERINC5	-0.478869	-3.44935	0.00061232	0.0136782	-0.503555
MYL12B	0.13969	3.44906	0.000612955	0.0136782	-0.504473
FBP1	0.42791	3.44867	0.000613819	0.0136826	-0.50572
SMG5	0.101893	3.44793	0.000615464	0.013693	-0.508091
PROC	0.411178	3.44786	0.000615619	0.013693	-0.508315
LOC100130264	-0.145406	-3.44726	0.000616967	0.0137081	-0.510251
AOX1	0.539306	3.4469	0.000617765	0.0137111	-0.511397
FRMD4A	-0.178758	-3.44507	0.000621857	0.013767	-0.517245
CISH	0.40163	3.44479	0.000622488	0.013767	-0.518142
RTN4RL2	-0.438474	-3.44439	0.000623376	0.013767	-0.519405
FAM188A	-0.152024	-3.44418	0.00062386	0.013767	-0.520092
LOC728819	0.429797	3.44413	0.000623972	0.013767	-0.520251
CACNG2	-0.78988	-3.44398	0.000624308	0.013767	-0.520728
ELF5	0.296735	3.44325	0.000625947	0.0137883	-0.52305
MED24	-0.100234	-3.44284	0.00062688	0.0137941	-0.52437
CA2	0.393743	3.44222	0.000628275	0.0138099	-0.526338
UPK2	-0.383072	-3.44188	0.000629048	0.0138121	-0.527427
NAPA	0.16284	3.44092	0.000631227	0.0138452	-0.530489
ARHGAP12	-0.189367	-3.44034	0.000632545	0.0138593	-0.532337
RANBP17	-0.522647	-3.43976	0.000633874	0.0138736	-0.534195
METTL12	-0.208893	-3.43905	0.000635507	0.0138864	-0.536473
RAB42	0.401989	3.43891	0.000635813	0.0138864	-0.5369
FAM45A	-0.119589	-3.43835	0.000637104	0.0138998	-0.538695
ATP5L2	-0.174506	-3.43693	0.000640366	0.0139562	-0.543217
BCAT2	0.221433	3.43495	0.000644941	0.014041	-0.54952
FZD6	0.344736	3.43437	0.000646297	0.0140556	-0.55138
FAM20C	0.273297	3.43307	0.000649333	0.0141067	-0.55553
WNT7B	-0.649385	-3.4323	0.000651118	0.0141305	-0.557959
CASP8	0.332435	3.43153	0.000652945	0.0141552	-0.56044
NLGN1	-0.210466	-3.43022	0.000656008	0.0142066	-0.564583
HDAC4	-0.236576	-3.42859	0.000659881	0.014253	-0.569793
POP4	0.144163	3.42846	0.000660186	0.014253	-0.570203
BCL7B	0.107448	3.42813	0.000660968	0.014253	-0.57125
ADCK4	0.186252	3.42803	0.000661205	0.014253	-0.571568
NCRNA00181	0.297819	3.4276	0.000662221	0.014253	-0.572928
FASN	-0.213037	-3.42756	0.000662315	0.014253	-0.573053
NF1	-0.191099	-3.42638	0.000665142	0.0142988	-0.576823
DCAF16	-0.181405	-3.42566	0.000666862	0.0143208	-0.579109
PPP1R10	-0.11392	-3.42386	0.000671175	0.0143984	-0.584814
CAPN10	0.157593	3.42195	0.000675788	0.0144691	-0.590877
C2orf66	0.364012	3.42164	0.000676553	0.0144691	-0.591878
HSBP1L1	0.299563	3.42162	0.000676589	0.0144691	-0.591924
PLOD2	0.30476	3.42017	0.000680112	0.0145293	-0.59652
TMEM132C	-0.375165	-3.41967	0.000681343	0.014533	-0.59812
EMILIN2	0.49624	3.41951	0.000681745	0.014533	-0.598642
GFPT1	-0.136557	-3.41924	0.000682407	0.014533	-0.599501
SYNRG	-0.11702	-3.41857	0.00068404	0.0145527	-0.601617
VPS33A	-0.0818366	-3.41805	0.000685317	0.0145648	-0.603266
APOBEC3D	0.351728	3.41713	0.000687584	0.0145978	-0.606189
OR4K2	-0.207289	-3.4154	0.000691862	0.0146499	-0.611677
TCF7	0.350055	3.4153	0.000692107	0.0146499	-0.611989
COL5A3	0.365138	3.41515	0.000692467	0.0146499	-0.61245
NCRNA00171	-0.192299	-3.41485	0.000693208	0.0146499	-0.613397
KEL	0.384238	3.41469	0.000693606	0.0146499	-0.613904
KIAA1409	-0.479366	-3.41387	0.000695666	0.0146783	-0.616528
PLCXD2	-0.390999	-3.41356	0.000696419	0.0146791	-0.617484
H2AFJ	0.277593	3.4123	0.000699571	0.014725	-0.62148
ARHGAP18	0.326992	3.41212	0.000700031	0.014725	-0.622061
MORN3	0.506052	3.41105	0.000702722	0.0147365	-0.625455
RICTOR	-0.229466	-3.41049	0.000704119	0.0147365	-0.627213
CC2D1B	0.166163	3.41045	0.000704234	0.0147365	-0.627357
VIPAR	-0.125833	-3.41034	0.000704498	0.0147365	-0.627689
CCDC114	0.392863	3.41033	0.000704517	0.0147365	-0.627713
C7orf52	-0.518476	-3.41019	0.000704882	0.0147365	-0.62817
ZNF25	-0.202701	-3.4081	0.000710174	0.014832	-0.634786
C1RL	0.406728	3.40754	0.000711586	0.014833	-0.636544
TNRC6C	-0.145425	-3.40751	0.000711667	0.014833	-0.636644
TTC39A	0.488498	3.40659	0.000714023	0.0148444	-0.639567
UST	-0.293881	-3.40655	0.000714126	0.0148444	-0.639695
RPL27	-0.216472	-3.40644	0.000714383	0.0148444	-0.640013
OSBP	-0.0996459	-3.40426	0.000719984	0.014936	-0.64692
ELAVL4	-0.5543	-3.40392	0.000720862	0.014936	-0.647999
GATAD1	0.164294	3.40388	0.000720973	0.014936	-0.648134
C5orf39	0.318084	3.40314	0.000722863	0.0149423	-0.65045
GCLM	0.230134	3.40298	0.000723287	0.0149423	-0.650968
SPATS2L	0.237032	3.40291	0.00072346	0.0149423	-0.65118
EHD1	-0.189767	-3.40211	0.000725526	0.0149531	-0.653702
METTL10	-0.152302	-3.40174	0.000726482	0.0149531	-0.654866
HTATIP2	0.326903	3.40164	0.000726744	0.0149531	-0.655185
FZD1	0.250915	3.40158	0.000726897	0.0149531	-0.655371
SLC16A5	0.308728	3.40109	0.000728187	0.0149561	-0.656939
HMP19	-0.635119	-3.40097	0.000728499	0.0149561	-0.657318
IL17RC	0.315598	3.39934	0.000732741	0.0150281	-0.662452
CD63	0.216396	3.39874	0.000734312	0.0150453	-0.664346
FAM110A	-0.298296	-3.39724	0.000738249	0.0151109	-0.669073
CYB5R1	0.227002	3.39667	0.000739762	0.0151268	-0.670884
EAPP	-0.10395	-3.39463	0.000745156	0.0152148	-0.677307
FBLL1	-0.419654	-3.39448	0.000745546	0.0152148	-0.67777
PHF16	-0.277426	-3.39401	0.000746814	0.0152205	-0.679272
TSHZ1	-0.186017	-3.39356	0.000747992	0.0152205	-0.680666
TMEM154	0.384284	3.39354	0.000748053	0.0152205	-0.680738
OR51Q1	-0.0505939	-3.39299	0.000749518	0.0152297	-0.682468
TPRG1	0.349995	3.39282	0.000749987	0.0152297	-0.68302
CD6	0.444156	3.39188	0.000752497	0.0152569	-0.685974
PAX3	0.587551	3.39168	0.000753024	0.0152569	-0.686593
TCTEX1D2	0.180666	3.39118	0.000754368	0.0152569	-0.68817
UBQLN4	-0.126833	-3.39075	0.000755519	0.0152569	-0.689517
ACVR2A	-0.139721	-3.39066	0.00075577	0.0152569	-0.689811
GATAD2B	-0.110784	-3.39065	0.000755787	0.0152569	-0.689831
RELB	0.276803	3.38962	0.00075858	0.0152983	-0.693091
CAPRIN1	-0.117238	-3.38868	0.00076112	0.0153344	-0.696045
LRCH2	-0.18377	-3.38818	0.000762465	0.0153451	-0.697606
LCTL	0.508621	3.38793	0.000763145	0.0153451	-0.698395
CCDC42B	0.53801	3.38729	0.000764896	0.01535	-0.700421
PSIMCT-1	-0.258108	-3.38651	0.000767013	0.01535	-0.702863
ERBB2	0.22537	3.3865	0.000767038	0.01535	-0.702891
DGCR9	-0.417741	-3.3863	0.000767586	0.01535	-0.703523
BHLHE40	0.352528	3.38627	0.000767661	0.01535	-0.703609
FLJ26850	0.350754	3.38613	0.000768047	0.01535	-0.704053
BUB3	-0.126464	-3.38592	0.00076862	0.01535	-0.704713
RPL17	-0.20052	-3.38482	0.000771627	0.0153878	-0.708164
HOXB4	0.59288	3.38437	0.00077288	0.0153878	-0.709598
TRIM23	-0.160892	-3.38421	0.000773327	0.0153878	-0.710108
KLF17	0.369975	3.3837	0.000774708	0.0153878	-0.711685
TNFRSF12A	0.580674	3.38366	0.00077482	0.0153878	-0.711813
CLASP1	-0.133699	-3.38355	0.000775133	0.0153878	-0.71217
RRN3	-0.139665	-3.38289	0.000776944	0.0153878	-0.714232
CXorf40B	0.0842283	3.38267	0.000777549	0.0153878	-0.714921
LEPREL1	0.435352	3.38243	0.000778231	0.0153878	-0.715695
ZNF346	-0.090718	-3.38241	0.000778282	0.0153878	-0.715753
TMEM35	-0.317078	-3.38218	0.000778927	0.0153878	-0.716485
SLC16A14	-0.209805	-3.38197	0.000779507	0.0153878	-0.717143
OSCAR	0.348491	3.38155	0.000780652	0.0153956	-0.71844
VPS26A	-0.102521	-3.38043	0.000783769	0.0154352	-0.721962
SLC10A3	0.15025	3.38029	0.000784167	0.0154352	-0.722409
GPR45	-0.424131	-3.37846	0.000789273	0.0155082	-0.728144
C1orf85	0.26805	3.37761	0.000791657	0.0155082	-0.730809
SHANK2	-0.525253	-3.37743	0.00079217	0.0155082	-0.731382
SAA2	0.398639	3.37738	0.000792307	0.0155082	-0.731535
SCRT2	-0.686855	-3.37734	0.000792409	0.0155082	-0.731648
GLUD2	-0.311288	-3.37719	0.000792839	0.0155082	-0.732128
TGM5	0.460718	3.37708	0.000793163	0.0155082	-0.732488
RAC3	-0.28074	-3.37677	0.000794023	0.0155103	-0.733446
CYP2S1	0.329373	3.3753	0.000798173	0.0155742	-0.738051
LYPD6	0.461833	3.37507	0.000798815	0.0155742	-0.738762
ARHGEF7	-0.181892	-3.37411	0.000801547	0.0156127	-0.741778
TBC1D10C	0.373117	3.37343	0.00080349	0.0156316	-0.743917
ANXA2P2	0.503008	3.37323	0.000804044	0.0156316	-0.744526
KCNH1	-0.470064	-3.37257	0.000805927	0.0156385	-0.746592
ALG1	0.158534	3.37219	0.000807038	0.0156385	-0.747809
ZDHHC23	0.582056	3.37199	0.000807588	0.0156385	-0.748411
MT1DP	0.243805	3.3718	0.000808146	0.0156385	-0.749021
PLBD1	0.439252	3.37178	0.000808205	0.0156385	-0.749086
ST13	-0.138104	-3.37138	0.000809357	0.015646	-0.750344
KATNAL2	0.263764	3.36926	0.000815455	0.0157491	-0.756975
RXRB	-0.0981959	-3.36872	0.000817001	0.0157593	-0.758647
TPPP3	0.534588	3.36845	0.000817784	0.0157593	-0.759493
SLC25A35	0.183264	3.36819	0.000818547	0.0157593	-0.760317
PDE2A	-0.453483	-3.36801	0.000819053	0.0157593	-0.760862
UNC5A	-0.475381	-3.36747	0.00082063	0.0157706	-0.762561
ENOSF1	0.362159	3.36728	0.000821176	0.0157706	-0.76315
VSTM1	0.35288	3.36674	0.000822747	0.015786	-0.764838
SYTL1	0.417481	3.36628	0.000824103	0.0157972	-0.766292
IQCG	0.249409	3.36567	0.000825869	0.015804	-0.768182
BCL9L	-0.165088	-3.36563	0.000825995	0.015804	-0.768317
FOXD4	-0.273438	-3.36493	0.000828045	0.0158285	-0.770506
RPS6	-0.219399	-3.36409	0.000830506	0.0158607	-0.773126
CDHR4	0.282398	3.36376	0.000831487	0.0158647	-0.774169
C1orf159	0.224679	3.36325	0.000832986	0.0158786	-0.77576
SGMS2	0.36936	3.36259	0.00083492	0.0158858	-0.777808
CTBP2	-0.138137	-3.36248	0.000835244	0.0158858	-0.778151
TM9SF3	-0.114622	-3.36233	0.000835686	0.0158858	-0.778618
C2orf34	0.215046	3.36186	0.000837081	0.0158976	-0.780091
CTCF	-0.0975711	-3.36124	0.000838917	0.0159117	-0.782026
ARSD	0.357846	3.36109	0.000839373	0.0159117	-0.782505
PLDN	-0.112922	-3.36075	0.00084039	0.0159145	-0.783574
FAM13C	-0.293864	-3.36038	0.000841484	0.0159145	-0.784723
AASDHPPT	-0.128584	-3.35975	0.000843343	0.0159145	-0.786672
A1BG	0.354265	3.35974	0.000843386	0.0159145	-0.786717
ADAMTS3	0.536946	3.35965	0.000843642	0.0159145	-0.786985
SLC1A6	-0.630145	-3.35947	0.000844174	0.0159145	-0.787541
POLDIP3	-0.136062	-3.35903	0.000845495	0.0159248	-0.788921
UBL4A	0.166058	3.3566	0.000852804	0.0160477	-0.796521
NCRNA00085	0.305212	3.35535	0.000856567	0.0161038	-0.800408
FGD1	-0.163043	-3.35443	0.000859344	0.0161412	-0.803265
SPN	0.390376	3.35375	0.000861417	0.0161536	-0.805393
TWF2	0.164433	3.35355	0.000862017	0.0161536	-0.806007
TBC1D1	0.24947	3.35344	0.000862363	0.0161536	-0.806361
BBS10	-0.155536	-3.35286	0.000864136	0.016172	-0.808174
TAF5	-0.144765	-3.35239	0.000865543	0.0161836	-0.809611
FAM160B1	-0.130307	-3.34984	0.000873375	0.0163146	-0.817561
CHD4	-0.120816	-3.34959	0.000874138	0.0163146	-0.818332
KCNQ2	-0.380126	-3.34863	0.00087711	0.0163436	-0.821328
CWF19L1	-0.115422	-3.34857	0.000877283	0.0163436	-0.821502
RGR	-0.610781	-3.34771	0.000879957	0.0163785	-0.824189
NCRNA00152	0.481982	3.34697	0.000882262	0.0164066	-0.826497
CCNB1IP1	-0.220333	-3.34573	0.000886102	0.0164631	-0.83033
EFHC2	0.57139	3.34525	0.000887609	0.0164761	-0.83183
C11orf2	-0.179815	-3.34365	0.00089264	0.0165546	-0.836817
SULT1A1	0.328154	3.34248	0.000896306	0.0166075	-0.840433
PLCB2	0.363304	3.34175	0.000898627	0.0166295	-0.842715
LOC442421	-0.239144	-3.34159	0.000899112	0.0166295	-0.843192
HIST1H2BH	0.26297	3.34099	0.00090104	0.0166332	-0.845082
GLUD1	-0.246916	-3.34077	0.000901726	0.0166332	-0.845753
ZAP70	0.41485	3.34076	0.000901743	0.0166332	-0.84577
VAX2	-0.425141	-3.34022	0.000903483	0.0166504	-0.847471
STRA6	0.532936	3.33712	0.000913358	0.0168081	-0.857061
HSDL1	-0.111432	-3.33671	0.000914677	0.0168081	-0.858334
SERTAD3	0.284243	3.33631	0.000915982	0.0168081	-0.859593
USP13	-0.135436	-3.336	0.00091697	0.0168081	-0.860543
LOC84989	-0.347741	-3.33595	0.000917128	0.0168081	-0.860696
ZNF675	-0.18161	-3.33577	0.000917705	0.0168081	-0.86125
CLYBL	0.238161	3.33575	0.000917775	0.0168081	-0.861317
KCNE1	0.338785	3.33542	0.000918837	0.0168126	-0.862338
ITGA3	0.326818	3.33473	0.000921072	0.0168385	-0.864481
DCTN4	-0.111082	-3.33365	0.00092456	0.0168872	-0.867816
PTPRT	-0.585092	-3.33201	0.000929907	0.0169245	-0.872902
DNAJC21	0.10719	3.33194	0.000930144	0.0169245	-0.873126
TGFB2	0.539964	3.33172	0.000930847	0.0169245	-0.873793
ERCC5	-0.121727	-3.33172	0.000930866	0.0169245	-0.873811
TBC1D14	-0.13598	-3.33158	0.000931314	0.0169245	-0.874236
ACBD5	-0.160318	-3.33151	0.000931549	0.0169245	-0.874457
CCT4	-0.102328	-3.33076	0.000933996	0.016954	-0.876772
TAS1R1	0.435297	3.32933	0.000938705	0.0170244	-0.881207
NCF1	0.447576	3.32847	0.000941547	0.017051	-0.883873
CORO1A	0.272043	3.32838	0.000941833	0.017051	-0.884141
FES	0.273519	3.32808	0.000942817	0.0170538	-0.885063
IQUB	0.364022	3.32771	0.000944043	0.0170609	-0.886208
C9orf110	0.466427	3.32699	0.000946424	0.0170889	-0.88843
HDAC2	-0.145124	-3.32619	0.000949076	0.0171217	-0.890897
CUL2	-0.120298	-3.32534	0.000951932	0.0171582	-0.893547
KIF2A	-0.196712	-3.32408	0.000956131	0.0172187	-0.897428
CHRNB1	0.157878	3.32377	0.000957165	0.0172223	-0.898381
ZDHHC12	0.311013	3.32267	0.000960858	0.0172736	-0.901776
TTLL10	0.230133	3.32205	0.000962956	0.0172868	-0.9037
MRPL36	0.120718	3.32195	0.00096328	0.0172868	-0.903996
C17orf39	-0.0820935	-3.32092	0.000966783	0.0173213	-0.907197
ZNF93	-0.276306	-3.32088	0.000966889	0.0173213	-0.907293
ZNF683	0.353455	3.31815	0.000976172	0.0174641	-0.915718
LOC100130331	-0.330473	-3.3179	0.000977024	0.0174641	-0.916487
CECR1	0.331976	3.31738	0.000978805	0.0174641	-0.918092
PTGS1	0.417324	3.31719	0.000979464	0.0174641	-0.918685
HIVEP3	0.275332	3.31681	0.000980769	0.0174641	-0.919859
SOD3	0.500345	3.31673	0.000981028	0.0174641	-0.920092
RAGE	0.250584	3.3166	0.000981503	0.0174641	-0.920519
KLHL23	-0.314687	-3.31655	0.000981662	0.0174641	-0.920661
FBXO6	0.325064	3.3158	0.000984233	0.0174946	-0.922967
CCDC65	0.436979	3.3151	0.000986661	0.0175226	-0.925139
FRAT1	-0.267394	-3.3147	0.000988025	0.0175317	-0.926356
IGF2BP2	0.632434	3.31415	0.000989935	0.0175504	-0.928059
ANKRD16	-0.168148	-3.31368	0.000991575	0.0175533	-0.929518
DTNA	0.255967	3.31341	0.000992489	0.0175533	-0.93033
SEMA6C	-0.235797	-3.31336	0.000992663	0.0175533	-0.930484
C16orf63	0.0847984	3.31179	0.000998113	0.0176345	-0.93531
PHLDA3	0.34077	3.31116	0.00100032	0.0176529	-0.937255
MX1	0.378661	3.311	0.00100088	0.0176529	-0.937747
CKMT2	0.372796	3.30884	0.00100847	0.0177623	-0.944408
SNURF	-0.39193	-3.30874	0.00100881	0.0177623	-0.944703
SPATA3	0.251482	3.3078	0.00101213	0.0178056	-0.947603
CLCNKB	0.262429	3.30742	0.00101346	0.0178137	-0.948761
TMEM64	0.178181	3.30682	0.00101558	0.0178356	-0.950596
PARVG	0.376051	3.3064	0.00101707	0.0178465	-0.951891
HMG20A	-0.122074	-3.30615	0.00101796	0.0178468	-0.952658
RNF135	0.317503	3.30591	0.00101882	0.0178468	-0.953408
PCGF6	-0.13362	-3.30522	0.00102127	0.0178744	-0.955524
CHGB	-0.558113	-3.30475	0.00102295	0.0178831	-0.956973
SLC2A13	-0.363082	-3.30437	0.0010243	0.0178831	-0.958134
NEU4	-0.48872	-3.30435	0.00102438	0.0178831	-0.958202
IFIT5	-0.136005	-3.30383	0.00102622	0.0178994	-0.959782
ZNF512	-0.117519	-3.3036	0.00102706	0.0178994	-0.960502
AKT2	0.164315	3.30328	0.00102822	0.0179044	-0.961496
ZFYVE20	-0.147386	-3.30261	0.00103061	0.0179295	-0.963543
SOCS2	0.400673	3.30219	0.00103211	0.0179295	-0.964826
WDFY1	-0.107184	-3.30214	0.00103228	0.0179295	-0.96497
C19orf39	0.150071	3.30183	0.00103339	0.0179337	-0.965921
OLIG2	-0.405731	-3.30027	0.00103904	0.0180164	-0.97072
MTMR2	-0.131109	-3.29943	0.0010421	0.0180543	-0.97331
GPX8	0.543971	3.29763	0.00104864	0.0181522	-0.97882
TUB	-0.274977	-3.29735	0.00104965	0.0181545	-0.979672
HPS3	0.179247	3.29655	0.00105257	0.0181896	-0.982118
LLGL2	0.338746	3.29621	0.00105383	0.0181961	-0.983173
TPRA1	0.115736	3.29595	0.00105479	0.0181973	-0.983972
ANXA4	0.199469	3.29509	0.00105794	0.0182363	-0.986597
NKD1	-0.322772	-3.29454	0.00105997	0.0182556	-0.988287
RIPK3	0.337559	3.2943	0.00106084	0.0182556	-0.989008
GPR123	-0.331863	-3.29397	0.00106207	0.0182616	-0.990033
RAD21	-0.12532	-3.29102	0.00107302	0.0184344	-0.999064
SOCS1	0.378647	3.29069	0.00107423	0.0184398	-1.00006
HINT3	-0.11288	-3.29026	0.00107586	0.0184523	-1.00139
PTPRS	-0.174719	-3.28981	0.00107755	0.0184659	-1.00278
ST8SIA2	-0.618879	-3.28864	0.00108193	0.0185017	-1.00634
UBE2R2	-0.0947797	-3.28859	0.0010821	0.0185017	-1.00648
BTBD17	-0.472496	-3.28845	0.00108265	0.0185017	-1.00694
CFDP1	-0.127272	-3.28824	0.00108343	0.0185017	-1.00757
F2RL2	0.579813	3.28805	0.00108415	0.0185017	-1.00815
PPP2R2D	-0.124374	-3.28759	0.00108586	0.0185156	-1.00954
DNAJC12	-0.251078	-3.28706	0.00108787	0.0185221	-1.01117
SLMO1	0.244678	3.28701	0.00108805	0.0185221	-1.01131
LGALS8	0.21789	3.2843	0.00109835	0.0186527	-1.01961
MRAS	0.178284	3.28429	0.00109839	0.0186527	-1.01964
ZNF560	-0.825875	-3.28424	0.00109857	0.0186527	-1.01978
MYST4	-0.208973	-3.28377	0.00110036	0.0186527	-1.02122
ISL2	0.531647	3.28356	0.00110116	0.0186527	-1.02186
KRT8	0.528282	3.28343	0.00110164	0.0186527	-1.02225
SPHKAP	-0.736146	-3.28314	0.00110278	0.0186527	-1.02315
GPR27	-0.478282	-3.28308	0.00110299	0.0186527	-1.02332
ZIC5	0.40623	3.28266	0.00110459	0.0186604	-1.0246
RHOD	0.470093	3.28239	0.00110562	0.0186604	-1.02542
TMEM138	0.134226	3.28225	0.00110617	0.0186604	-1.02586
NTAN1	0.170498	3.28141	0.00110939	0.0186963	-1.02841
AKAP3	-0.242805	-3.28083	0.00111162	0.0186963	-1.03018
ACOT1	0.253873	3.28082	0.00111166	0.0186963	-1.03021
SFRP1	-0.501647	-3.28072	0.00111205	0.0186963	-1.03052
BMPR1A	-0.180544	-3.28015	0.00111426	0.0186963	-1.03227
FXYD5	0.324116	3.28011	0.0011144	0.0186963	-1.03238
NSUN5	0.279343	3.28004	0.00111468	0.0186963	-1.0326
MBOAT1	0.353839	3.27976	0.00111578	0.0186996	-1.03347
IL20RA	0.5844	3.27922	0.00111787	0.0187193	-1.03512
DPH3	0.113447	3.27869	0.00111989	0.0187379	-1.03671
NEUROD4	-0.686111	-3.27828	0.0011215	0.0187495	-1.03797
XPNPEP1	-0.105078	-3.27751	0.00112448	0.018784	-1.04031
HSD17B3	0.497	3.27707	0.00112621	0.0187976	-1.04166
PADI1	0.339001	3.27651	0.00112841	0.018819	-1.04337
VIPR2	-0.677797	-3.27624	0.00112946	0.0188213	-1.04419
RUFY3	-0.156196	-3.275	0.00113429	0.0188841	-1.04795
FBXL7	0.217745	3.27479	0.00113513	0.0188841	-1.04861
ZNF627	-0.145935	-3.27457	0.00113599	0.0188841	-1.04927
MACC1	0.456552	3.27278	0.00114304	0.0189859	-1.05471
CCDC9	0.171249	3.27204	0.00114597	0.0190171	-1.05696
PRPF6	-0.143943	-3.27184	0.00114677	0.0190171	-1.05758
ASNSD1	-0.0766651	-3.27143	0.0011484	0.0190197	-1.05883
PGCP	0.338254	3.27111	0.00114966	0.0190197	-1.0598
ZCCHC7	-0.12268	-3.27095	0.00115033	0.0190197	-1.06031
C19orf66	0.262357	3.27079	0.00115095	0.0190197	-1.06079
NBR1	-0.101285	-3.27059	0.00115174	0.0190197	-1.06139
INTS5	-0.104183	-3.2704	0.00115249	0.0190197	-1.06196
RABL3	0.131242	3.2694	0.00115647	0.0190702	-1.065
AGPAT1	-0.0768765	-3.26887	0.00115859	0.0190897	-1.0666
SUPV3L1	-0.115412	-3.26824	0.00116111	0.019116	-1.06852
ZYX	0.228446	3.26738	0.0011646	0.0191316	-1.07115
CLCNKA	0.301588	3.26719	0.00116536	0.0191316	-1.07173
LOC100130776	0.437003	3.26714	0.00116556	0.0191316	-1.07188
PUS3	-0.142342	-3.26708	0.00116579	0.0191316	-1.07206
NUFIP1	-0.139594	-3.26626	0.0011691	0.0191706	-1.07455
FADS3	0.20649	3.26603	0.00117003	0.0191706	-1.07525
TATDN1	-0.136607	-3.26567	0.00117148	0.019179	-1.07634
RPS4X	-0.185946	-3.26537	0.00117269	0.0191836	-1.07725
CCDC24	0.25049	3.26421	0.00117739	0.0192451	-1.08077
TULP1	0.219807	3.26325	0.00118133	0.0192941	-1.0837
ISOC2	0.200929	3.26243	0.00118464	0.019324	-1.08617
KLHDC5	-0.131016	-3.26233	0.00118504	0.019324	-1.08646
RAB4B	0.18032	3.26155	0.00118825	0.0193547	-1.08884
PELI2	-0.207965	-3.26141	0.00118881	0.0193547	-1.08926
NPC2	0.262986	3.26012	0.00119412	0.019409	-1.09318
AP3M1	-0.124171	-3.25992	0.00119495	0.019409	-1.09379
MINA	0.291639	3.25967	0.001196	0.019409	-1.09456
KRT18	0.520262	3.25961	0.00119622	0.019409	-1.09472
RPL7A	-0.193492	-3.25945	0.00119688	0.019409	-1.0952
VWC2	-0.472347	-3.25718	0.00120627	0.0195342	-1.10208
AGXT2L2	0.17479	3.25709	0.00120665	0.0195342	-1.10236
ADIG	0.35595	3.2569	0.00120745	0.0195342	-1.10294
LOC440905	0.457696	3.25637	0.00120965	0.0195464	-1.10454
DNM3	-0.287213	-3.25621	0.00121031	0.0195464	-1.10502
C18orf8	0.0806278	3.25603	0.00121106	0.0195464	-1.10557
MYT1	-0.532153	-3.25461	0.00121702	0.0196163	-1.10989
HSPB7	0.401679	3.25454	0.0012173	0.0196163	-1.11009
LOXL1	0.540709	3.25372	0.00122076	0.0196567	-1.11258
LOC100128164	-0.260781	-3.25313	0.00122324	0.0196656	-1.11437
ATOH8	-0.428496	-3.2531	0.00122336	0.0196656	-1.11445
BCAT1	0.446126	3.2529	0.00122421	0.0196656	-1.11506
TNKS	-0.175308	-3.25267	0.00122515	0.0196656	-1.11574
CRCP	0.0925509	3.25132	0.00123085	0.0197114	-1.11982
PIK3R1	-0.227366	-3.25127	0.00123106	0.0197114	-1.11997
RPL39L	0.404287	3.25121	0.00123134	0.0197114	-1.12017
ADPRH	0.282654	3.25109	0.00123184	0.0197114	-1.12053
PKD2	0.196763	3.25081	0.00123301	0.0197147	-1.12136
HFE	0.362345	3.24996	0.00123664	0.0197425	-1.12394
MREG	0.268613	3.24978	0.0012374	0.0197425	-1.12449
TRPC6	-0.373412	-3.2497	0.00123776	0.0197425	-1.12474
C6orf26	0.307693	3.24934	0.00123927	0.0197425	-1.12582
AZIN1	-0.121596	-3.24907	0.00124044	0.0197425	-1.12664
USP49	-0.361021	-3.24905	0.00124052	0.0197425	-1.1267
PODN	-0.382985	-3.24847	0.00124301	0.0197668	-1.12846
PDZK1	0.209952	3.24675	0.00125037	0.0198684	-1.13365
RAP1B	0.137093	3.24615	0.00125292	0.0198849	-1.13544
TEX264	0.139594	3.24606	0.00125334	0.0198849	-1.13574
RNF146	-0.107624	-3.24561	0.00125527	0.0199002	-1.13709
ELL3	0.221417	3.24478	0.00125883	0.0199412	-1.13958
FAM21B	-0.151467	-3.24445	0.00126028	0.0199435	-1.14059
IRX5	0.62511	3.2443	0.00126092	0.0199435	-1.14104
POLR3A	-0.169005	-3.24389	0.00126272	0.0199545	-1.14229
MBD4	0.0838981	3.24353	0.00126428	0.0199545	-1.14337
CA13	0.278728	3.24334	0.00126508	0.0199545	-1.14393
CATSPER1	0.255367	3.24324	0.0012655	0.0199545	-1.14423
TCTA	0.14829	3.2416	0.00127265	0.0200488	-1.14918
KDM2B	-0.120027	-3.24142	0.00127344	0.0200488	-1.14972
PCK2	0.246757	3.24069	0.00127663	0.0200774	-1.15192
LOXL4	0.472217	3.24017	0.00127892	0.0200774	-1.1535
CGNL1	0.286373	3.23997	0.00127982	0.0200774	-1.15412
PAX1	-0.748495	-3.23995	0.0012799	0.0200774	-1.15417
GDF15	0.595598	3.23971	0.00128096	0.0200774	-1.1549
MRPL30	-0.100921	-3.23926	0.00128291	0.0200774	-1.15624
C15orf26	0.430866	3.23925	0.00128298	0.0200774	-1.15628
TTC33	-0.146301	-3.23922	0.00128308	0.0200774	-1.15635
TRMT5	-0.179112	-3.23894	0.00128433	0.0200818	-1.15721
PBX3	0.263177	3.23849	0.00128631	0.0200964	-1.15856
TMEFF2	-0.48129	-3.23828	0.00128723	0.0200964	-1.15919
H1F0	-0.192866	-3.23775	0.00128956	0.0201014	-1.16078
PMS2L11	0.254072	3.23765	0.00129003	0.0201014	-1.1611
NMNAT2	-0.438674	-3.23755	0.00129048	0.0201014	-1.16141
PDZD8	-0.269098	-3.23659	0.00129474	0.0201523	-1.1643
FSTL1	0.344482	3.23544	0.00129982	0.0202059	-1.16774
WDR86	-0.402328	-3.23537	0.00130014	0.0202059	-1.16796
CACNG4	-0.419867	-3.23485	0.00130247	0.0202267	-1.16953
TAC4	-0.461837	-3.23426	0.00130509	0.0202521	-1.1713
C1S	0.425974	3.23353	0.00130838	0.0202752	-1.17351
TOX	-0.361175	-3.23349	0.00130855	0.0202752	-1.17363
PDRG1	0.125065	3.23322	0.00130973	0.0202781	-1.17442
IL9R	0.175651	3.23239	0.00131348	0.0203126	-1.17692
CCDC69	0.270328	3.23229	0.00131394	0.0203126	-1.17723
LPIN3	0.375658	3.23174	0.00131639	0.0203352	-1.17887
ZNF423	-0.234299	-3.23077	0.00132079	0.0203754	-1.1818
BTRC	-0.159442	-3.23073	0.00132097	0.0203754	-1.18193
GTPBP4	-0.128968	-3.22949	0.00132658	0.0204453	-1.18565
TIAL1	-0.122714	-3.2292	0.00132791	0.0204453	-1.18653
PDGFRA	-0.449962	-3.22907	0.0013285	0.0204453	-1.18691
SEPHS1	-0.140036	-3.22856	0.00133079	0.020452	-1.18843
TLCD1	0.311841	3.22816	0.00133263	0.020452	-1.18964
PPP1R11	-0.0854173	-3.22802	0.00133325	0.020452	-1.19005
DNAJC18	-0.14398	-3.22788	0.00133391	0.020452	-1.19048
RHEB	0.127762	3.22788	0.00133392	0.020452	-1.19049
2020-03-01	-0.284897	-3.22742	0.00133602	0.020469	-1.19187
CCDC120	-0.224218	-3.22672	0.00133922	0.0205027	-1.19397
GBAS	0.142349	3.22561	0.00134431	0.0205654	-1.19731
C21orf62	0.590349	3.22492	0.00134744	0.0205979	-1.19935
GNAL	-0.449938	-3.22469	0.00134852	0.0205991	-1.20006
SMAGP	0.273885	3.22353	0.00135388	0.0206655	-1.20354
TNFAIP6	0.549931	3.22302	0.00135623	0.0206861	-1.20506
UBXN11	0.270696	3.22221	0.00135998	0.0207278	-1.20749
FLJ10661	0.352455	3.22108	0.00136525	0.0207692	-1.21088
RABGAP1	-0.121416	-3.22064	0.00136731	0.0207692	-1.2122
IQGAP1	0.301419	3.22063	0.00136737	0.0207692	-1.21224
FDX1L	0.171746	3.22057	0.00136765	0.0207692	-1.21243
MCF2L2	-0.423862	-3.22054	0.00136775	0.0207692	-1.21249
HADHA	-0.118137	-3.22011	0.00136976	0.0207844	-1.21378
ANP32C	-0.226386	-3.21881	0.00137587	0.0208615	-1.21768
RABL5	0.159909	3.2173	0.00138297	0.0209538	-1.22221
ALG12	0.118131	3.21698	0.00138446	0.0209609	-1.22315
CLEC5A	0.705283	3.21597	0.00138924	0.0210178	-1.22618
ICK	-0.179256	-3.21534	0.00139223	0.021044	-1.22807
FAM171B	-0.230387	-3.21518	0.00139303	0.021044	-1.22857
SPRY1	0.368638	3.21448	0.00139631	0.0210633	-1.23064
C19orf73	0.195338	3.21448	0.00139636	0.0210633	-1.23066
MRPS27	-0.0811084	-3.21365	0.0014003	0.0210926	-1.23314
SKAP2	0.376584	3.21364	0.00140035	0.0210926	-1.23317
FOXJ1	0.503185	3.21275	0.0014046	0.0211239	-1.23583
DLG5	-0.201814	-3.21264	0.0014051	0.0211239	-1.23615
RASEF	0.465626	3.21204	0.00140797	0.0211239	-1.23793
CD300LF	0.407538	3.21202	0.00140808	0.0211239	-1.238
AMIGO2	0.457568	3.21187	0.0014088	0.0211239	-1.23845
ITGB4	0.526458	3.21178	0.00140923	0.0211239	-1.23872
CNPY1	0.413853	3.2117	0.00140963	0.0211239	-1.23897
SLC15A3	0.326527	3.20969	0.00141931	0.0212533	-1.24497
NUDT22	0.152496	3.20895	0.00142286	0.021291	-1.24717
ZNF821	-0.163121	-3.20837	0.0014257	0.0213179	-1.24892
DRG1	-0.107566	-3.20808	0.00142709	0.0213232	-1.24977
FAM82A1	0.158175	3.207	0.00143235	0.0213662	-1.253
DBN1	-0.149718	-3.20699	0.00143242	0.0213662	-1.25305
TMEM71	0.473851	3.20684	0.00143311	0.0213662	-1.25347
NDUFA3	0.201353	3.20663	0.00143413	0.0213662	-1.25409
KDM6B	-0.181564	-3.20584	0.00143802	0.0213981	-1.25647
C2orf77	0.303776	3.20576	0.00143842	0.0213981	-1.25672
C6orf208	-0.367598	-3.20556	0.00143939	0.0213981	-1.25731
UPF3B	0.101313	3.20498	0.00144224	0.0214249	-1.25904
SNX27	-0.0834131	-3.20409	0.00144661	0.0214743	-1.2617
ZSWIM3	-0.108884	-3.20349	0.00144956	0.0214873	-1.26349
CDC40	-0.113288	-3.20348	0.00144958	0.0214873	-1.2635
SMS	0.197972	3.20314	0.00145127	0.0214968	-1.26452
WT1	0.469143	3.20157	0.00145904	0.0215706	-1.2692
OR4N2	-0.71307	-3.20152	0.00145926	0.0215706	-1.26934
WDYHV1	-0.128223	-3.20149	0.0014594	0.0215706	-1.26942
OLIG1	-0.41371	-3.20053	0.00146419	0.0216133	-1.2723
HERC5	0.410467	3.2004	0.00146484	0.0216133	-1.27269
CACNA1A	-0.349415	-3.20028	0.00146545	0.0216133	-1.27305
BCAP29	0.132726	3.1998	0.00146783	0.0216329	-1.27448
LIX1L	-0.147054	-3.19905	0.00147158	0.0216725	-1.27671
ACTR1A	-0.11097	-3.19765	0.00147855	0.0217597	-1.28086
NBAS	-0.0863782	-3.19636	0.00148507	0.0218312	-1.28472
AGTRAP	0.268856	3.19612	0.00148628	0.0218312	-1.28543
IRF3	0.202675	3.1958	0.00148788	0.0218312	-1.28638
DUSP10	0.323114	3.19564	0.00148871	0.0218312	-1.28687
GPR139	0.300613	3.19563	0.00148873	0.0218312	-1.28688
MLXIPL	0.459675	3.19504	0.00149171	0.0218587	-1.28864
GNG2	-0.256588	-3.19484	0.00149274	0.0218587	-1.28924
NAP1L3	-0.251403	-3.19443	0.00149482	0.0218665	-1.29046
BTF3	-0.132146	-3.19421	0.00149594	0.0218665	-1.29111
RBP3	-0.46183	-3.1941	0.00149647	0.0218665	-1.29143
VPS53	-0.0923448	-3.1936	0.00149903	0.0218883	-1.29293
BCOR	-0.186767	-3.19237	0.0015053	0.0219524	-1.29659
FHOD1	0.249689	3.19203	0.00150701	0.0219524	-1.29758
GRID1	-0.265169	-3.1919	0.00150768	0.0219524	-1.29798
DGKI	-0.346005	-3.1919	0.00150769	0.0219524	-1.29798
DLEC1	0.528042	3.19106	0.00151196	0.0219989	-1.30046
BOLA3	0.147687	3.19007	0.00151708	0.0220578	-1.30342
FLNC	0.572809	3.18976	0.00151866	0.0220651	-1.30434
PRDX6	0.242595	3.18886	0.00152327	0.0221067	-1.307
CD24	-0.472752	-3.18879	0.00152367	0.0221067	-1.30723
INSM2	-0.633704	-3.18832	0.00152608	0.022126	-1.30861
MRI1	0.219956	3.18768	0.00152941	0.0221584	-1.31052
DNAJC2	0.128779	3.18747	0.00153048	0.0221584	-1.31113
MYC	-0.331453	-3.18499	0.00154337	0.0223293	-1.31849
FAM86C	0.23478	3.18411	0.00154795	0.0223799	-1.32109
DHX58	0.278743	3.18388	0.00154914	0.0223814	-1.32177
ITGB8	0.286109	3.18278	0.00155497	0.0224497	-1.32505
CCDC89	0.386078	3.18205	0.00155878	0.0224786	-1.3272
ARHGAP28	-0.378401	-3.18198	0.00155916	0.0224786	-1.32742
PCDH20	-0.523574	-3.18169	0.00156066	0.0224845	-1.32826
BEND7	-0.194381	-3.18064	0.00156625	0.0225492	-1.33139
PTX3	0.476884	3.18033	0.00156789	0.022557	-1.33231
AKR7A3	0.312878	3.17971	0.00157115	0.0225704	-1.33413
FTL	0.259541	3.17956	0.00157196	0.0225704	-1.33458
GTPBP1	-0.110247	-3.17953	0.00157213	0.0225704	-1.33468
LARP7	0.108402	3.17783	0.00158116	0.0226842	-1.3397
DCAF4L1	0.229655	3.17744	0.00158322	0.0226891	-1.34084
ZNF669	-0.159553	-3.1773	0.001584	0.0226891	-1.34127
TCTEX1D1	0.680463	3.17702	0.00158547	0.0226891	-1.34209
SNX24	0.111629	3.17678	0.0015868	0.0226891	-1.34282
PICK1	0.32534	3.17671	0.00158714	0.0226891	-1.34301
LDHB	-0.148303	-3.17653	0.00158812	0.0226891	-1.34355
NDN	-0.309214	-3.17538	0.00159427	0.0227373	-1.34694
FAM35B	-0.135303	-3.17534	0.00159451	0.0227373	-1.34707
COX10	-0.0974658	-3.17528	0.00159483	0.0227373	-1.34724
KLF12	-0.200301	-3.17441	0.00159949	0.0227881	-1.3498
DPYD	0.385631	3.1735	0.00160445	0.0228429	-1.35252
TNKS2	-0.151358	-3.17322	0.00160596	0.0228484	-1.35334
FKRP	0.173362	3.17283	0.00160804	0.0228623	-1.35448
MAGIX	0.221082	3.17228	0.00161105	0.0228891	-1.35611
SLC12A7	0.244246	3.17176	0.00161385	0.0229131	-1.35764
FXYD3	0.459271	3.17131	0.00161633	0.0229324	-1.35898
CCNYL1	0.151297	3.17088	0.00161869	0.0229431	-1.36026
NETO1	-0.486942	-3.17058	0.00162031	0.0229431	-1.36114
DHX34	0.174608	3.17035	0.00162154	0.0229431	-1.3618
GRID2IP	-0.308552	-3.17035	0.00162155	0.0229431	-1.36181
KDELC2	0.310379	3.16927	0.00162749	0.0230112	-1.36501
HSPA13	-0.151789	-3.16851	0.00163161	0.0230536	-1.36723
RPA3	0.167984	3.16821	0.00163331	0.023055	-1.36814
TRIM67	-0.82159	-3.16809	0.00163395	0.023055	-1.36848
TPP2	-0.161567	-3.16759	0.00163669	0.0230778	-1.36995
SRY	0.267351	3.1667	0.00164163	0.0231315	-1.37259
KIAA1429	-0.107963	-3.16641	0.00164323	0.0231382	-1.37344
MYCBPAP	0.416775	3.16619	0.00164443	0.0231392	-1.37408
GALNT6	0.448967	3.16595	0.00164573	0.0231417	-1.37478
RPSAP52	0.265049	3.16535	0.0016491	0.0231731	-1.37657
TRIM38	0.278542	3.16436	0.00165456	0.023234	-1.37946
EPC1	-0.246977	-3.16356	0.00165907	0.0232791	-1.38185
LOC100131434	0.315449	3.16338	0.00166004	0.0232791	-1.38236
PNPLA4	0.432748	3.16207	0.00166738	0.023366	-1.38622
INSM1	-0.46176	-3.16162	0.00166992	0.0233775	-1.38756
PA2G4P4	-0.140508	-3.16152	0.00167047	0.0233775	-1.38785
NONO	-0.132522	-3.16101	0.00167334	0.0234017	-1.38935
ETV2	0.362992	3.16047	0.00167638	0.0234283	-1.39094
ZNF85	-0.196512	-3.15927	0.00168314	0.0235068	-1.39447
RASAL3	0.369138	3.15798	0.00169046	0.0235823	-1.39827
KRT7	0.486621	3.15791	0.00169085	0.0235823	-1.39847
PGPEP1	0.142357	3.15661	0.00169826	0.0236696	-1.4023
C9orf109	0.43806	3.15596	0.00170198	0.0237053	-1.40421
NAALADL2	0.235025	3.15468	0.00170931	0.0237813	-1.40798
AP4M1	0.136565	3.1546	0.00170975	0.0237813	-1.4082
TMEM54	0.222885	3.15351	0.00171601	0.0238361	-1.4114
ALDH7A1	0.330899	3.15351	0.00171602	0.0238361	-1.41141
KCND2	-0.424546	-3.15229	0.00172303	0.0239174	-1.41498
SERPINB6	0.222711	3.15154	0.00172739	0.0239617	-1.41719
ZSCAN2	-0.122152	-3.15031	0.00173454	0.0240385	-1.42081
KIAA0415	0.138311	3.14996	0.00173657	0.0240385	-1.42183
SAMD11	-0.497623	-3.14982	0.00173734	0.0240385	-1.42222
DENND1C	0.336103	3.14971	0.00173802	0.0240385	-1.42256
FAM3B	0.420733	3.14958	0.00173878	0.0240385	-1.42294
C6orf168	-0.262458	-3.14918	0.00174111	0.0240458	-1.42412
XKR6	-0.195656	-3.14909	0.00174165	0.0240458	-1.42439
DMPK	0.222988	3.14884	0.00174307	0.0240492	-1.4251
HS3ST3B1	0.483351	3.14821	0.00174676	0.024084	-1.42696
NUP62CL	0.388986	3.14779	0.00174924	0.0241019	-1.4282
C2orf65	0.327875	3.14711	0.0017532	0.0241403	-1.43018
CSNK1E	-0.168017	-3.14662	0.0017561	0.024164	-1.43162
HOXD11	0.578359	3.14602	0.00175964	0.0241965	-1.43338
SH2D2A	0.3617	3.14544	0.00176306	0.0242273	-1.43508
ZNF578	-0.279452	-3.14468	0.00176752	0.0242572	-1.4373
C4orf47	0.383518	3.14467	0.0017676	0.0242572	-1.43733
SLC6A9	0.359508	3.14383	0.00177257	0.0243093	-1.4398
CHMP2A	0.151805	3.14316	0.00177658	0.024332	-1.44177
DLL1	-0.362135	-3.14315	0.0017766	0.024332	-1.44178
C14orf45	0.185231	3.14294	0.00177784	0.0243327	-1.44239
RDH10	0.321977	3.14209	0.00178291	0.0243859	-1.44489
PSD4	0.29812	3.14183	0.00178445	0.0243906	-1.44564
ZNF572	-0.182191	-3.1416	0.00178583	0.0243933	-1.44632
CBLN3	0.368775	3.1406	0.0017918	0.0244582	-1.44924
SMOC1	-0.546089	-3.14041	0.00179299	0.0244582	-1.44982
DES	0.717465	3.14021	0.00179416	0.0244582	-1.45039
IL2RG	0.402862	3.13806	0.00180709	0.0246181	-1.45667
PKD1L1	0.327529	3.1374	0.00181107	0.0246561	-1.4586
FBXW11	-0.107637	-3.13674	0.00181512	0.0246948	-1.46055
NNMT	0.580209	3.13646	0.00181676	0.0247008	-1.46134
CSNK2A1	-0.107279	-3.13622	0.00181822	0.0247043	-1.46205
TSNAXIP1	0.252407	3.1349	0.0018263	0.0247976	-1.46593
STK40	0.212992	3.13439	0.00182938	0.024823	-1.4674
GPR55	0.375316	3.13379	0.00183305	0.0248563	-1.46915
LHFPL3	-0.454927	-3.13355	0.0018345	0.0248597	-1.46985
RNF165	-0.366242	-3.13291	0.00183848	0.024897	-1.47174
HPX	0.307459	3.13263	0.00184016	0.0249034	-1.47254
CASP6	0.241692	3.13212	0.00184331	0.0249296	-1.47404
ZNF454	-0.200474	-3.13186	0.00184487	0.0249343	-1.47478
ABCG1	-0.227657	-3.13118	0.00184907	0.0249747	-1.47677
FAM192A	-0.0956414	-3.13089	0.00185086	0.024975	-1.47761
KIAA1586	-0.165372	-3.13078	0.00185153	0.024975	-1.47793
TGIF1	0.332099	3.13004	0.00185611	0.0250016	-1.48009
RPL31P11	-0.269982	-3.12972	0.00185813	0.0250016	-1.48104
MT1F	0.389275	3.12959	0.00185893	0.0250016	-1.48142
ELFN2	-0.469896	-3.12945	0.00185976	0.0250016	-1.48181
TXN	0.159397	3.12916	0.0018616	0.0250016	-1.48267
MICAL3	-0.153758	-3.129	0.00186255	0.0250016	-1.48312
ZNF286A	-0.16046	-3.1287	0.00186444	0.0250016	-1.484
GRAMD1C	0.354927	3.12831	0.00186688	0.0250016	-1.48515
ZC3H12B	-0.349513	-3.128	0.00186879	0.0250016	-1.48605
MCPH1	-0.0894403	-3.1278	0.00187002	0.0250016	-1.48662
IGF2BP3	0.548622	3.12764	0.00187101	0.0250016	-1.48708
C12orf34	-0.317655	-3.12761	0.00187121	0.0250016	-1.48717
SAMD14	-0.197124	-3.12748	0.00187204	0.0250016	-1.48756
NACAP1	-0.167784	-3.12726	0.00187343	0.0250016	-1.48821
IL3RA	0.212664	3.12725	0.00187348	0.0250016	-1.48824
HDAC5	-0.1297	-3.12717	0.00187396	0.0250016	-1.48846
TSPYL4	-0.186416	-3.12713	0.00187421	0.0250016	-1.48858
TMSL3	0.233547	3.12661	0.00187746	0.0250288	-1.49009
FAM84B	-0.337347	-3.12629	0.00187946	0.0250391	-1.49102
ST6GALNAC2	0.449263	3.12598	0.00188138	0.0250402	-1.49192
ETHE1	0.170092	3.12589	0.00188198	0.0250402	-1.4922
ETS1	-0.274319	-3.12515	0.00188663	0.0250858	-1.49435
SUSD5	-0.593009	-3.12459	0.00189014	0.0251163	-1.49598
ISCU	0.121144	3.12408	0.00189333	0.0251275	-1.49745
TEAD2	0.320941	3.1239	0.00189451	0.0251275	-1.498
NF2	-0.0927436	-3.12387	0.00189466	0.0251275	-1.49807
MAPK4	0.323823	3.12329	0.00189837	0.0251604	-1.49978
ZNF217	0.255932	3.1226	0.0019027	0.0252016	-1.50177
OLR1	0.527029	3.12135	0.00191064	0.0252761	-1.50541
CPPED1	0.298088	3.12133	0.00191079	0.0252761	-1.50548
EIF4ENIF1	-0.093017	-3.12094	0.00191322	0.025292	-1.50659
LOC541471	0.431009	3.11836	0.00192972	0.0254715	-1.5141
MYO1E	0.266164	3.11811	0.00193132	0.0254715	-1.51483
APOL4	0.611689	3.11806	0.00193164	0.0254715	-1.51497
BMS1	-0.0854324	-3.11804	0.00193176	0.0254715	-1.51503
C16orf87	-0.148397	-3.11654	0.00194143	0.0255825	-1.51939
FIGF	0.322233	3.11575	0.00194653	0.0256177	-1.52168
NEUROD1	-0.520237	-3.11571	0.00194677	0.0256177	-1.52179
FUCA2	0.298604	3.11555	0.00194784	0.0256177	-1.52227
CBX4	-0.135083	-3.11507	0.00195095	0.0256421	-1.52366
LOC723972	-0.185764	-3.11481	0.00195264	0.0256463	-1.52442
SLC12A6	-0.155565	-3.11463	0.00195377	0.0256463	-1.52493
MAP3K6	0.247079	3.11444	0.00195503	0.0256465	-1.52549
CDKN1B	-0.121146	-3.11379	0.00195923	0.0256851	-1.52737
LOC100129034	0.217746	3.11312	0.00196362	0.0257263	-1.52933
TMEM176B	0.395601	3.1118	0.00197225	0.0258228	-1.53316
C5orf49	0.576545	3.11143	0.00197466	0.0258293	-1.53422
FSD1	-0.290994	-3.11118	0.00197628	0.0258293	-1.53494
C10orf105	0.556861	3.11081	0.00197872	0.0258293	-1.53602
SFXN1	-0.119209	-3.11081	0.00197874	0.0258293	-1.53603
TRPV5	0.245477	3.11076	0.00197903	0.0258293	-1.53616
TCP1	-0.104571	-3.11053	0.00198055	0.0258327	-1.53683
CCDC40	0.318327	3.1103	0.00198204	0.0258357	-1.53748
CD164	0.165633	3.10997	0.00198423	0.0258479	-1.53845
KBTBD7	-0.26977	-3.10884	0.00199172	0.0259289	-1.54174
TEX10	-0.128575	-3.10799	0.00199732	0.0259781	-1.5442
PLEKHG1	0.277991	3.10783	0.00199834	0.0259781	-1.54464
TMEM30A	-0.118398	-3.10769	0.00199929	0.0259781	-1.54506
ECD	-0.123591	-3.10683	0.00200498	0.0260059	-1.54754
SEMA3A	0.561174	3.10682	0.00200506	0.0260059	-1.54758
ACTL6B	-0.614328	-3.1068	0.00200523	0.0260059	-1.54765
EHMT2	-0.128085	-3.10656	0.00200678	0.0260096	-1.54832
RCAN3	0.356823	3.10609	0.00200994	0.0260341	-1.5497
MFSD7	0.286092	3.10542	0.00201442	0.0260757	-1.55164
C3orf66	0.412393	3.10512	0.00201641	0.026085	-1.55251
NUAK2	0.330974	3.10412	0.0020231	0.0261453	-1.5554
RPL37A	-0.193018	-3.10377	0.00202544	0.0261453	-1.55641
B3GNT5	0.382842	3.1037	0.00202593	0.0261453	-1.55662
ADO	-0.113213	-3.10354	0.00202697	0.0261453	-1.55707
TSPYL3	-0.243202	-3.10347	0.00202744	0.0261453	-1.55727
C1orf88	0.423773	3.10305	0.00203029	0.0261657	-1.5585
ZDHHC16	-0.103642	-3.10282	0.00203182	0.026169	-1.55916
MGC21881	-0.211379	-3.10199	0.00203741	0.0262245	-1.56156
ITGB5	0.280031	3.10131	0.002042	0.0262671	-1.56353
MYO15B	0.360029	3.10091	0.00204468	0.0262768	-1.56467
SF3B2	-0.0996225	-3.10082	0.00204532	0.0262768	-1.56494
TCF4	-0.171777	-3.0988	0.00205903	0.0264232	-1.57078
PPIC	0.311761	3.09844	0.00206144	0.0264232	-1.5718
ARHGAP31	-0.221181	-3.09834	0.00206213	0.0264232	-1.5721
CCDC37	0.478046	3.09824	0.00206281	0.0264232	-1.57238
CDK8	-0.218658	-3.09819	0.00206314	0.0264232	-1.57252
CNDP2	0.129115	3.09731	0.00206917	0.0264603	-1.57507
HES6	-0.354981	-3.09722	0.00206977	0.0264603	-1.57533
EFCAB5	-0.279668	-3.0972	0.00206991	0.0264603	-1.57538
CARD11	0.329894	3.09648	0.0020749	0.0265076	-1.57749
GSPT2	-0.110237	-3.09619	0.00207685	0.0265161	-1.57831
FBXO21	-0.124617	-3.09582	0.00207941	0.0265321	-1.57938
NCRNA00092	0.495156	3.09509	0.00208441	0.0265688	-1.58148
ABHD11	0.16133	3.0946	0.0020878	0.0265688	-1.5829
MGEA5	-0.119905	-3.0946	0.00208783	0.0265688	-1.58291
GALNT14	-0.444307	-3.0945	0.00208848	0.0265688	-1.58319
IGFBPL1	-0.611168	-3.09443	0.00208899	0.0265688	-1.5834
ZNF319	-0.103036	-3.09427	0.00209004	0.0265688	-1.58384
RSF1	-0.176153	-3.09389	0.00209273	0.0265797	-1.58496
GMPR	0.438148	3.09377	0.00209356	0.0265797	-1.58531
SERTAD2	0.181791	3.09332	0.00209661	0.0265797	-1.58658
USP29	0.19644	3.09313	0.00209795	0.0265797	-1.58714
AQP1	0.614983	3.09305	0.00209848	0.0265797	-1.58736
C2orf27A	-0.385318	-3.09293	0.00209936	0.0265797	-1.58772
ETV7	0.41817	3.09276	0.00210051	0.0265797	-1.5882
GMPPB	0.13333	3.09265	0.00210126	0.0265797	-1.58851
IRGM	0.149085	3.09219	0.00210446	0.0266037	-1.58984
DDB1	-0.0853465	-3.09182	0.00210708	0.0266205	-1.59093
DPP10	-0.409504	-3.09136	0.00211029	0.0266446	-1.59226
KIF3C	-0.260254	-3.09047	0.00211645	0.0267061	-1.5948
IFITM3	0.326781	3.08993	0.00212021	0.0267228	-1.59635
SLA2	0.271268	3.08984	0.00212088	0.0267228	-1.59663
CHCHD7	0.171894	3.08972	0.00212168	0.0267228	-1.59696
ZNF18	0.097601	3.08934	0.00212439	0.0267405	-1.59807
HN1	-0.206184	-3.08903	0.00212652	0.0267509	-1.59895
SLC35D3	-0.373804	-3.08869	0.00212892	0.0267646	-1.59993
TTC9C	-0.0841873	-3.08668	0.00214306	0.0269182	-1.60571
SLC7A11	0.306144	3.08659	0.00214375	0.0269182	-1.60599
RABL2B	0.131284	3.08621	0.0021464	0.026935	-1.60707
CELF5	-0.437385	-3.08585	0.00214897	0.0269508	-1.60812
ZNF843	-0.217114	-3.08541	0.00215208	0.0269733	-1.60938
CSRP1	0.385634	3.08508	0.00215439	0.0269857	-1.61031
VAT1L	-0.461373	-3.08413	0.00216118	0.0270543	-1.61306
BAHCC1	-0.181118	-3.0836	0.00216494	0.0270848	-1.61458
HMSD	0.431625	3.08312	0.00216839	0.0271115	-1.61597
RGS3	0.246928	3.08284	0.00217037	0.0271197	-1.61677
HNRNPH3	-0.111088	-3.08055	0.0021868	0.0273084	-1.62335
COL5A2	0.415567	3.07959	0.00219372	0.0273734	-1.62611
TRIM8	-0.140476	-3.07946	0.00219467	0.0273734	-1.62648
TTC25	0.241805	3.07918	0.0021967	0.0273821	-1.62729
RPS18	-0.18441	-3.07885	0.00219907	0.0273949	-1.62823
SLC35C2	0.0905397	3.07689	0.00221328	0.0275123	-1.63385
FAM138F	0.298911	3.07674	0.00221437	0.0275123	-1.63428
VTA1	-0.108586	-3.07672	0.00221453	0.0275123	-1.63434
PHC1	-0.158988	-3.07654	0.0022158	0.0275123	-1.63484
LMLN	0.166258	3.07651	0.00221605	0.0275123	-1.63494
C19orf47	0.121509	3.07632	0.00221741	0.0275123	-1.63548
ATP1A3	-0.386079	-3.07626	0.00221787	0.0275123	-1.63566
SMARCA4	-0.117623	-3.07575	0.00222161	0.027542	-1.63713
WDR34	0.193034	3.07414	0.00223336	0.0276584	-1.64173
TMEM129	0.123159	3.0741	0.00223369	0.0276584	-1.64186
TTC36	-0.254055	-3.07362	0.00223723	0.0276821	-1.64324
BCL2L1	0.130037	3.07332	0.00223943	0.0276821	-1.6441
GRIN2D	-0.267335	-3.07296	0.00224204	0.0276821	-1.64512
PGAM2	0.417318	3.07292	0.00224231	0.0276821	-1.64522
OR10H2	0.0827856	3.07292	0.00224234	0.0276821	-1.64524
CXorf1	-0.319315	-3.0724	0.00224617	0.0277126	-1.64672
LYSMD4	0.22052	3.0716	0.00225205	0.0277685	-1.649
C9orf3	0.209007	3.07129	0.00225435	0.0277802	-1.64989
HPS6	-0.104942	-3.07106	0.00225609	0.027785	-1.65057
WDR1	0.136421	3.07083	0.00225775	0.0277887	-1.65121
LOC100240735	0.27635	3.07024	0.00226218	0.0278243	-1.65292
GBP1	0.457789	3.06992	0.00226452	0.0278243	-1.65382
TWSG1	0.209487	3.0699	0.0022647	0.0278243	-1.65389
FAM35A	-0.12556	-3.06961	0.00226681	0.0278335	-1.6547
HSPE1	0.115945	3.06931	0.0022691	0.027845	-1.65558
MT1A	0.440723	3.06878	0.00227305	0.0278768	-1.6571
PDGFRL	0.352859	3.06825	0.00227698	0.0278862	-1.65861
TRERF1	-0.170785	-3.06816	0.00227767	0.0278862	-1.65887
C6orf132	0.208714	3.06813	0.00227789	0.0278862	-1.65896
GZMH	0.430621	3.0679	0.00227961	0.0278906	-1.65961
PHF6	-0.156912	-3.06763	0.0022816	0.0278982	-1.66037
TUBGCP4	-0.17496	-3.06744	0.00228307	0.0278996	-1.66094
CCDC117	-0.111231	-3.06621	0.00229226	0.0279953	-1.66444
ZCCHC9	0.114258	3.06596	0.00229414	0.0280016	-1.66516
SP100	0.308926	3.06507	0.00230084	0.0280405	-1.6677
PNMA1	-0.146357	-3.06503	0.00230114	0.0280405	-1.66781
BEND4	-0.50784	-3.06499	0.00230144	0.0280405	-1.66793
CPA1	0.2516	3.06481	0.00230279	0.0280405	-1.66844
RIN2	-0.187921	-3.06443	0.00230568	0.0280414	-1.66953
POLL	-0.13276	-3.06435	0.00230626	0.0280414	-1.66975
GRIA4	-0.356685	-3.06426	0.00230696	0.0280414	-1.67002
TMEM57	-0.0997278	-3.064	0.0023089	0.0280483	-1.67075
PPM1J	0.387383	3.06322	0.00231486	0.0281041	-1.673
KIAA0040	0.39338	3.0625	0.00232031	0.0281389	-1.67505
PJA1	-0.11553	-3.06235	0.00232144	0.0281389	-1.67547
BRE	-0.0878751	-3.06212	0.00232316	0.0281389	-1.67612
PRPSAP2	-0.100498	-3.06196	0.00232443	0.0281389	-1.6766
PKD1L2	0.387841	3.06165	0.00232676	0.0281389	-1.67747
C17orf69	-0.174899	-3.06155	0.00232753	0.0281389	-1.67776
CHD7	-0.257197	-3.06153	0.0023277	0.0281389	-1.67782
EPHA1	0.298079	3.06139	0.00232875	0.0281389	-1.67821
SPP1	0.504674	3.06113	0.00233076	0.0281389	-1.67897
TCTN1	0.175771	3.0608	0.00233323	0.0281389	-1.67989
NFIB	-0.18608	-3.0607	0.00233405	0.0281389	-1.6802
SPEF1	0.439084	3.06068	0.00233417	0.0281389	-1.68024
ADAM29	-0.392881	-3.06043	0.00233608	0.0281454	-1.68096
WDR78	0.413423	3.05954	0.0023429	0.028211	-1.6835
DUSP6	0.326137	3.05885	0.00234817	0.0282578	-1.68545
ASCL2	0.318659	3.05775	0.0023567	0.0283439	-1.68862
C10orf18	-0.158976	-3.05751	0.00235852	0.0283491	-1.68929
CDH26	0.246511	3.05678	0.00236413	0.0283953	-1.69136
ALDH1A3	0.688684	3.05656	0.00236589	0.0283953	-1.69201
ZNF446	0.150701	3.05648	0.0023665	0.0283953	-1.69224
CEP68	-0.12511	-3.0561	0.0023694	0.0284134	-1.6933
SIPA1L1	0.261588	3.05592	0.00237078	0.0284134	-1.69381
LATS2	0.299639	3.05572	0.00237238	0.028416	-1.6944
PIH1D2	0.239885	3.05519	0.00237645	0.0284481	-1.69589
IPMK	-0.377842	-3.05453	0.0023816	0.0284931	-1.69778
LAT2	0.350591	3.05412	0.00238483	0.0285145	-1.69896
CD180	0.382456	3.05395	0.00238616	0.0285145	-1.69945
FHL3	0.245743	3.0536	0.00238889	0.0285305	-1.70044
PRKD2	0.194574	3.05305	0.00239314	0.0285646	-1.70199
CBS	-0.262536	-3.05237	0.00239845	0.0286114	-1.70392
LOC100132215	0.276371	3.05201	0.00240132	0.028629	-1.70497
RPS15A	-0.194471	-3.05183	0.00240274	0.0286293	-1.70548
THNSL1	-0.157053	-3.0501	0.0024163	0.0287742	-1.71039
BRSK2	-0.304061	-3.04923	0.00242317	0.0288389	-1.71286
RPS12	-0.200074	-3.04906	0.00242454	0.0288389	-1.71336
PQLC3	0.200668	3.04844	0.00242946	0.0288806	-1.71512
EID3	0.399104	3.04736	0.00243803	0.0289552	-1.71819
HDAC7	0.14689	3.04729	0.00243855	0.0289552	-1.71838
VPS11	-0.0868654	-3.04671	0.00244316	0.0289931	-1.72002
DCDC2	0.401438	3.04606	0.00244838	0.0290326	-1.72188
NKX2-2	-0.295409	-3.04594	0.00244932	0.0290326	-1.72222
CLDN4	0.279705	3.04363	0.00246789	0.0292359	-1.7288
TNFSF13	0.223303	3.04306	0.00247247	0.0292733	-1.73041
QRSL1	-0.112707	-3.04287	0.00247394	0.0292738	-1.73093
IFI44	0.300914	3.0417	0.00248342	0.029369	-1.73426
NCAM1	-0.21014	-3.04076	0.00249104	0.0294422	-1.73693
C3orf15	0.406924	3.04039	0.00249404	0.0294607	-1.73798
VPS33B	-0.0853037	-3.03988	0.00249818	0.0294811	-1.73942
PHF21A	-0.120678	-3.03982	0.00249864	0.0294811	-1.73958
CCDC96	0.234372	3.03931	0.00250281	0.0294996	-1.74104
PCOTH	0.29622	3.03928	0.00250308	0.0294996	-1.74113
LOC144571	0.244146	3.03846	0.00250979	0.0295616	-1.74346
2020-03-10	0.324427	3.0374	0.00251841	0.0296303	-1.74645
ABHD6	-0.176786	-3.03739	0.00251851	0.0296303	-1.74648
ZNF506	-0.112715	-3.03634	0.00252712	0.0297032	-1.74946
LOC221710	-0.145425	-3.03628	0.0025276	0.0297032	-1.74962
REPS2	-0.377419	-3.03536	0.00253518	0.0297753	-1.75223
C21orf125	-0.411509	-3.03494	0.00253868	0.0297993	-1.75343
PTPN2	0.135886	3.03435	0.00254352	0.0298392	-1.75509
BMPR2	-0.136046	-3.03403	0.00254617	0.0298449	-1.756
RUNX1T1	-0.37377	-3.03394	0.00254692	0.0298449	-1.75625
FAM53A	0.291324	3.03348	0.0025507	0.0298449	-1.75754
F7	-0.439892	-3.03347	0.00255078	0.0298449	-1.75757
S100A2	0.388421	3.03341	0.00255128	0.0298449	-1.75774
SHISA3	-0.346671	-3.03236	0.00256005	0.0299305	-1.76073
CPA2	0.321107	3.03143	0.00256775	0.0300033	-1.76335
GAPT	0.483936	3.03076	0.00257335	0.0300452	-1.76524
ZBTB12	-0.195081	-3.03053	0.00257533	0.0300452	-1.76591
EBF4	-0.226688	-3.03048	0.00257572	0.0300452	-1.76605
PARP11	-0.15277	-3.03008	0.00257903	0.0300667	-1.76716
SRP19	0.0670282	3.02901	0.00258803	0.0301376	-1.7702
MAP2	-0.274447	-3.02901	0.00258805	0.0301376	-1.7702
MYCN	-0.320412	-3.02867	0.00259088	0.0301535	-1.77116
EIF3D	-0.124661	-3.02776	0.00259858	0.0302259	-1.77374
CTSZ	0.274694	3.02748	0.00260092	0.0302361	-1.77452
LENG9	0.28253	3.02717	0.0026035	0.030249	-1.77538
ANKRD35	0.502748	3.02661	0.00260831	0.0302876	-1.77699
UBE2O	-0.118845	-3.02623	0.00261153	0.0303079	-1.77806
GABRB3	-0.478853	-3.02512	0.00262092	0.0303997	-1.78119
GNB2L1	-0.183854	-3.02427	0.00262816	0.0304647	-1.78359
TXLNA	0.170153	3.02411	0.00262949	0.0304647	-1.78403
SERTAD1	0.260455	3.02371	0.00263293	0.0304752	-1.78517
PDLIM3	0.331674	3.02366	0.00263337	0.0304752	-1.78531
MBTPS2	-0.144609	-3.02332	0.00263628	0.0304852	-1.78627
SDC4	0.526251	3.02321	0.0026372	0.0304852	-1.78658
HABP2	0.389438	3.02288	0.00264001	0.0305005	-1.78751
MAP2K3	0.195025	3.02234	0.00264465	0.0305369	-1.78903
ADCY5	-0.287654	-3.02178	0.00264942	0.0305748	-1.7906
DLC1	0.259645	3.02104	0.00265583	0.0306315	-1.79271
ZNF248	-0.17431	-3.02029	0.00266227	0.0306886	-1.79481
METTL2A	-0.0967348	-3.01975	0.00266691	0.0307134	-1.79633
LPAR6	0.28732	3.01959	0.00266833	0.0307134	-1.79679
PUSL1	0.18363	3.01949	0.00266912	0.0307134	-1.79705
C1R	0.432628	3.01935	0.00267041	0.0307134	-1.79747
RAB3D	0.264194	3.01845	0.00267816	0.0307544	-1.79999
ARSF	0.648577	3.0184	0.00267861	0.0307544	-1.80014
BLVRB	0.26568	3.01813	0.00268097	0.0307544	-1.80091
DNAJC10	0.131911	3.018	0.00268209	0.0307544	-1.80127
PCDH15	-0.608314	-3.01797	0.00268229	0.0307544	-1.80133
DUSP23	0.2567	3.01788	0.00268306	0.0307544	-1.80158
PLEK2	0.40394	3.01756	0.00268585	0.0307544	-1.80249
C4orf49	0.290762	3.01755	0.00268595	0.0307544	-1.80252
VPS72	-0.115015	-3.01721	0.00268893	0.0307713	-1.80348
COMMD7	0.0850463	3.0166	0.00269421	0.0308145	-1.80519
SLC27A5	0.178938	3.01628	0.00269703	0.0308297	-1.8061
RANBP6	-0.128	-3.01428	0.00271453	0.0310124	-1.81173
HSPB11	0.16822	3.01395	0.00271745	0.0310131	-1.81267
HGD	0.321078	3.01393	0.00271761	0.0310131	-1.81272
NRXN1	-0.338872	-3.01336	0.00272261	0.0310529	-1.81432
CXCL14	0.657273	3.01315	0.00272443	0.0310564	-1.8149
TMEM170B	-0.155376	-3.01235	0.00273155	0.031111	-1.81717
TFAP4	-0.184947	-3.01227	0.00273225	0.031111	-1.81739
KRBA1	0.111829	3.01202	0.00273447	0.0311117	-1.8181
RIPPLY2	-0.318896	-3.01183	0.00273614	0.0311117	-1.81863
NOVA1	-0.215478	-3.01175	0.00273686	0.0311117	-1.81886
CTSA	0.148691	3.01124	0.00274136	0.0311456	-1.82029
FYCO1	0.188934	3.01049	0.00274803	0.0311718	-1.8224
KIF13B	0.174836	3.0104	0.00274881	0.0311718	-1.82265
SH2D1A	0.342427	3.01024	0.00275018	0.0311718	-1.82308
C20orf20	0.12326	3.01022	0.00275037	0.0311718	-1.82314
GEMIN7	0.139764	3.01001	0.00275221	0.0311718	-1.82372
SHF	-0.194483	-3.00987	0.00275345	0.0311718	-1.82411
PCBP3	-0.376259	-3.00978	0.00275432	0.0311718	-1.82439
QPCTL	0.158856	3.00942	0.00275747	0.0311718	-1.82538
LOC653113	0.20439	3.00911	0.00276024	0.0311718	-1.82626
SRRM3	-0.440538	-3.0091	0.00276033	0.0311718	-1.82628
TCTN2	0.199342	3.00907	0.00276063	0.0311718	-1.82638
FAM113B	0.322051	3.0088	0.00276299	0.0311718	-1.82712
LOC400759	0.414425	3.00875	0.0027635	0.0311718	-1.82728
NAMPT	0.271889	3.00859	0.00276492	0.0311718	-1.82773
PLSCR1	0.310613	3.00749	0.00277474	0.0312592	-1.83081
SNTA1	0.349723	3.00738	0.00277572	0.0312592	-1.83112
AKAP1	-0.130189	-3.00702	0.00277891	0.031278	-1.83212
TRPC2	0.273244	3.00655	0.00278312	0.0313082	-1.83344
LOC650368	0.209952	3.0058	0.00278992	0.0313675	-1.83556
BBS5	0.123789	3.00496	0.00279746	0.0314351	-1.83791
MYO1A	0.27957	3.00292	0.00281597	0.0316065	-1.84364
BCO2	0.290717	3.0029	0.00281615	0.0316065	-1.84369
ZBTB22	-0.083324	-3.00277	0.00281733	0.0316065	-1.84406
RSPH10B2	0.29612	3.00237	0.00282097	0.03163	-1.84518
CDH18	-0.580272	-3.00204	0.00282394	0.031646	-1.8461
ST8SIA3	-0.559889	-3.00077	0.00283552	0.0317585	-1.84966
C14orf181	0.315736	3.00052	0.00283783	0.0317669	-1.85036
TAF7L	0.268852	3.00008	0.00284187	0.0317948	-1.8516
LOC441666	-0.461344	-2.99938	0.0028482	0.0318483	-1.85354
TMCC2	-0.244612	-2.9992	0.00284986	0.0318495	-1.85404
WDR37	-0.146884	-2.99893	0.00285233	0.0318599	-1.8548
CSNK1A1P	0.18252	2.99827	0.00285848	0.0319111	-1.85667
RPRM	-0.438225	-2.99762	0.00286446	0.0319605	-1.85848
C15orf40	0.0884119	2.99618	0.00287773	0.0320726	-1.8625
MMP16	-0.355942	-2.99613	0.0028782	0.0320726	-1.86264
ASTN2	-0.209405	-2.99602	0.00287919	0.0320726	-1.86294
BATF3	0.358765	2.99506	0.00288811	0.0321545	-1.86563
INMT	0.5283	2.9948	0.00289054	0.0321641	-1.86636
SAR1B	0.123368	2.99459	0.00289251	0.0321686	-1.86695
BDKRB2	0.484114	2.99391	0.00289884	0.0322135	-1.86885
SP140	0.291182	2.99382	0.00289969	0.0322135	-1.86911
RNF150	-0.302992	-2.99184	0.00291815	0.0324011	-1.87462
GSTM5	0.587033	2.99053	0.00293046	0.0325047	-1.87828
STX6	-0.102802	-2.99051	0.00293065	0.0325047	-1.87834
ELOVL2	0.489988	2.98973	0.00293806	0.0325628	-1.88053
RPL38	-0.173761	-2.98962	0.00293906	0.0325628	-1.88083
ITK	0.490223	2.98908	0.00294419	0.0326021	-1.88235
EN2	0.496269	2.98866	0.00294818	0.0326286	-1.88352
C8orf41	-0.105549	-2.98751	0.002959	0.0327308	-1.88671
ESPNL	0.400768	2.98726	0.00296144	0.0327401	-1.88742
USH2A	0.236941	2.98674	0.00296634	0.0327766	-1.88886
PRPF18	-0.105127	-2.9864	0.00296964	0.0327954	-1.88982
LOXL3	0.273626	2.98581	0.00297524	0.0328242	-1.89146
PRPF8	-0.10285	-2.98579	0.00297544	0.0328242	-1.89152
ADAM22	-0.336597	-2.98507	0.00298229	0.0328793	-1.89352
HRASLS5	0.482557	2.98493	0.00298364	0.0328793	-1.89391
CHRNA9	0.501323	2.98425	0.00299012	0.032933	-1.89579
RAB32	0.301845	2.98406	0.00299201	0.0329361	-1.89634
HOXB2	0.520719	2.98358	0.00299657	0.032938	-1.89767
DTD1	-0.120147	-2.98353	0.00299708	0.032938	-1.89781
SEPW1	0.184257	2.98346	0.00299772	0.032938	-1.898
EBNA1BP2	0.116832	2.98337	0.00299859	0.032938	-1.89825
HIST1H2BJ	0.313307	2.98263	0.00300575	0.032968	-1.90032
SLC24A3	-0.250841	-2.98263	0.00300575	0.032968	-1.90032
PMS2L2	0.19126	2.98248	0.00300713	0.032968	-1.90072
MAP1LC3A	0.338397	2.98242	0.00300774	0.032968	-1.9009
C3orf42	0.17213	2.98194	0.00301239	0.0330013	-1.90224
C9orf6	0.123449	2.98077	0.0030237	0.0331075	-1.9055
S100A14	0.329423	2.98053	0.00302603	0.0331153	-1.90616
KCNB1	-0.39348	-2.98015	0.0030297	0.0331324	-1.90722
GRINL1A	-0.0944875	-2.98004	0.00303081	0.0331324	-1.90754
MAB21L1	0.435486	2.97926	0.00303837	0.0331973	-1.9097
STAT5A	0.285287	2.97881	0.00304277	0.0332192	-1.91096
C17orf91	0.239735	2.97872	0.00304361	0.0332192	-1.9112
TMEM121	-0.289731	-2.97818	0.00304892	0.033247	-1.91271
ARNTL2	0.357552	2.97813	0.00304939	0.033247	-1.91284
RPL37	-0.174753	-2.97742	0.00305627	0.0333043	-1.9148
CROT	0.212338	2.97717	0.00305878	0.033314	-1.91551
TFEC	0.356748	2.97656	0.00306471	0.0333479	-1.9172
SKAP1	0.329817	2.97647	0.00306562	0.0333479	-1.91745
LRRC26	-0.285939	-2.97635	0.00306677	0.0333479	-1.91778
FBXL19	-0.147499	-2.97616	0.00306869	0.0333511	-1.91832
DDX52	-0.11161	-2.97526	0.00307747	0.0334288	-1.9208
LRP12	-0.15786	-2.97486	0.0030814	0.0334539	-1.92191
ABCA3	-0.125257	-2.97421	0.00308783	0.0335	-1.92372
RPLP0	-0.214574	-2.9741	0.00308892	0.0335	-1.92403
SLIT1	-0.433194	-2.9736	0.00309389	0.0335037	-1.92542
LARP4B	-0.0960884	-2.97349	0.00309494	0.0335037	-1.92572
TMLHE	-0.146318	-2.97345	0.00309535	0.0335037	-1.92583
C8G	0.223068	2.97341	0.00309579	0.0335037	-1.92596
TTC23L	0.305585	2.97269	0.00310295	0.0335568	-1.92796
ZNF239	-0.183971	-2.97249	0.00310489	0.0335568	-1.9285
CST3	0.319474	2.97242	0.0031056	0.0335568	-1.9287
TTC26	0.285766	2.97211	0.00310871	0.0335728	-1.92957
ADD2	-0.247907	-2.97182	0.00311158	0.033586	-1.93037
C12orf53	-0.238767	-2.97111	0.00311863	0.0336445	-1.93234
SCNN1B	0.487605	2.97057	0.00312401	0.0336848	-1.93383
HSN2	-0.40083	-2.97017	0.00312795	0.0337062	-1.93493
GPR3	0.420673	2.97004	0.00312928	0.0337062	-1.9353
TMEM205	0.122404	2.96883	0.00314137	0.0338187	-1.93864
ZNF576	0.112718	2.96842	0.00314553	0.0338457	-1.93979
PRG2	0.249146	2.96803	0.00314943	0.0338699	-1.94087
LOC145845	0.219839	2.96715	0.0031583	0.0339476	-1.94331
2020-03-04	-0.658541	-2.96601	0.00316978	0.0340531	-1.94646
TP53I13	0.220031	2.9656	0.00317402	0.0340809	-1.94762
TNNI2	0.341982	2.96535	0.00317647	0.0340818	-1.94829
HOXD10	0.608063	2.96526	0.00317743	0.0340818	-1.94855
NFYA	-0.133608	-2.96501	0.00317994	0.0340909	-1.94924
MCC	0.242477	2.96408	0.00318939	0.0341744	-1.95181
C10orf46	-0.099063	-2.96388	0.00319147	0.0341789	-1.95238
EN1	0.711816	2.96367	0.00319355	0.0341833	-1.95294
CD207	-0.367171	-2.96312	0.00319914	0.0342219	-1.95446
ALDH1B1	-0.125427	-2.96294	0.00320101	0.0342219	-1.95497
ATAD3B	0.242932	2.96283	0.00320216	0.0342219	-1.95528
ACTN4	0.151014	2.96243	0.00320623	0.0342476	-1.95638
IL15	0.369818	2.96212	0.00320945	0.0342641	-1.95725
HEATR4	0.264115	2.96113	0.00321951	0.0343537	-1.95997
SLC25A24	0.277082	2.96041	0.00322699	0.0344006	-1.96198
TRIM22	0.298594	2.96038	0.00322725	0.0344006	-1.96205
AG2	-0.312668	-2.95993	0.00323187	0.034432	-1.9633
TMEM20	-0.17181	-2.95943	0.00323707	0.0344694	-1.96469
MXD1	-0.129886	-2.95876	0.00324396	0.0345249	-1.96653
C7orf63	0.2684	2.95842	0.00324743	0.0345439	-1.96746
CYP4F2	0.296219	2.95704	0.00326177	0.0346785	-1.97128
FHDC1	-0.403207	-2.95669	0.00326543	0.0346995	-1.97226
ZNF828	-0.138377	-2.95595	0.00327308	0.0347627	-1.97429
MYCL1	-0.319436	-2.95561	0.00327663	0.0347824	-1.97523
KDM3B	-0.122478	-2.95508	0.00328213	0.0348137	-1.97668
USP10	-0.0798477	-2.955	0.00328297	0.0348137	-1.9769
GPR172B	0.288095	2.95458	0.00328738	0.0348233	-1.97807
HOXA9	0.508762	2.9545	0.00328819	0.0348233	-1.97828
DENND1A	0.100178	2.95443	0.00328897	0.0348233	-1.97849
PCDHB9	-0.284291	-2.95358	0.00329791	0.0348713	-1.98084
EPX	-0.212572	-2.95356	0.00329807	0.0348713	-1.98089
LARGE	-0.173425	-2.95351	0.00329859	0.0348713	-1.98102
PHTF1	0.206159	2.95316	0.00330229	0.0348924	-1.98199
PRPF31	0.149881	2.95281	0.00330596	0.0349133	-1.98296
SGPL1	-0.115686	-2.95179	0.00331664	0.035008	-1.98575
ZBTB6	-0.113604	-2.95149	0.00331985	0.0350239	-1.98659
CHST6	0.432641	2.94849	0.00335169	0.0353416	-1.99487
NME5	0.26387	2.94807	0.00335608	0.0353698	-1.99601
SIX4	-0.30668	-2.9475	0.00336225	0.0354167	-1.9976
KIAA1244	-0.402727	-2.94719	0.0033655	0.0354327	-1.99844
DHTKD1	-0.157798	-2.94698	0.00336773	0.035438	-1.99901
LOC283922	-0.241527	-2.94673	0.00337041	0.035448	-1.9997
WBP11P1	-0.188278	-2.94655	0.00337237	0.0354505	-2.00021
PMS2L1	0.118931	2.94552	0.00338335	0.0355477	-2.00302
CAV2	0.287728	2.94534	0.00338533	0.0355503	-2.00353
C14orf79	0.155545	2.94488	0.00339029	0.0355842	-2.0048
RHBDD2	0.149217	2.94456	0.00339375	0.0356022	-2.00568
CARD16	0.426663	2.94418	0.00339783	0.0356269	-2.00672
CDKN2A	-0.480171	-2.94384	0.00340147	0.0356468	-2.00765
CLEC18C	0.411412	2.94337	0.00340655	0.0356819	-2.00895
SFN	0.466448	2.94288	0.00341185	0.0356926	-2.01029
DLX3	-0.39539	-2.94284	0.00341234	0.0356926	-2.01042
CBX1	-0.0915422	-2.94279	0.00341279	0.0356926	-2.01053
LOC144486	-0.221256	-2.94249	0.00341608	0.0356948	-2.01137
GNG5	0.273358	2.94231	0.00341798	0.0356948	-2.01185
MRPS12	0.161212	2.94229	0.00341821	0.0356948	-2.01191
BDH2	0.253758	2.94184	0.00342314	0.0357281	-2.01316
ZNF91	-0.14581	-2.94117	0.00343039	0.0357855	-2.01499
SGMS1	-0.159858	-2.93955	0.00344803	0.0359484	-2.01944
ZSCAN5A	0.168645	2.93928	0.00345097	0.0359484	-2.02018
CHRNA1	0.607442	2.9391	0.00345295	0.0359484	-2.02067
MT1E	0.368852	2.93903	0.0034537	0.0359484	-2.02086
PSEN2	0.134098	2.93856	0.00345892	0.0359484	-2.02217
TMEM22	0.316856	2.93846	0.00345997	0.0359484	-2.02244
POLR2L	0.165213	2.93841	0.00346057	0.0359484	-2.02259
RASSF7	0.240974	2.93839	0.00346073	0.0359484	-2.02263
RPL19P12	-0.287937	-2.9383	0.00346176	0.0359484	-2.02288
CCDC30	0.249334	2.93812	0.00346373	0.0359506	-2.02338
PIRT	0.601369	2.93784	0.00346674	0.0359637	-2.02413
SETDB1	-0.115385	-2.93756	0.00346986	0.0359779	-2.02491
KCNE1L	0.607241	2.93704	0.00347554	0.0360011	-2.02633
PDXDC1	-0.0820269	-2.93704	0.0034756	0.0360011	-2.02634
ZAR1	0.144118	2.93688	0.00347736	0.0360012	-2.02678
F11R	0.255188	2.93626	0.00348417	0.0360535	-2.02848
ZNRF2	0.176035	2.93575	0.00348982	0.036073	-2.02988
RWDD2A	-0.116389	-2.93563	0.00349117	0.036073	-2.03021
PCDHGC4	-0.454055	-2.93561	0.00349133	0.036073	-2.03026
ZCCHC24	-0.185652	-2.93499	0.00349825	0.0361172	-2.03197
NLRC5	0.281676	2.93491	0.00349913	0.0361172	-2.03219
RTCD1	0.136813	2.93441	0.00350464	0.0361559	-2.03355
CNGA3	0.591123	2.93305	0.00351973	0.0362934	-2.03727
SMARCC2	-0.0951229	-2.93258	0.00352494	0.03632	-2.03856
STBD1	0.210214	2.9325	0.00352585	0.03632	-2.03878
MMP11	0.373086	2.93174	0.00353431	0.0363749	-2.04086
POLR3D	-0.163667	-2.93159	0.00353604	0.0363749	-2.04128
STK11IP	0.119577	2.93155	0.0035365	0.0363749	-2.04139
LHX5	-0.768109	-2.93098	0.00354287	0.0364222	-2.04295
KIAA0556	0.141384	2.93028	0.00355063	0.0364765	-2.04485
[truncated: 18,531 more rows]

## Sheet: |logFC|≥1，adj P<0.05
GeneID	logFC	t	P.Value	adj.P.Val	B
LGR6	1.31915	5.21443	2.7635e-07	0.000563654	6.47322
MEOX2	1.22947	5.10328	4.84687e-07	0.000653305	5.95785
CUX2	-1.02707	-4.81732	1.96358e-06	0.00100781	4.6776
AQP5	1.02445	4.60829	5.23128e-06	0.00152226	3.78393
MOXD1	1.1557	4.39074	1.39534e-05	0.00196459	2.8922
CHI3L1	1.27874	4.32638	1.85109e-05	0.00227562	2.63594
KLRC2	-1.04607	-4.30903	1.99644e-05	0.00231727	2.56746
ABCC3	1.0162	4.09144	5.04103e-05	0.0034729	1.73025
TLX1	-1.08393	-3.94085	9.34715e-05	0.00476171	1.17438
POSTN	1.06136	3.53857	0.00044211	0.0114027	-0.214608
SERPINA5	0.833321	3.92848	9.82506e-05	0.00488398	1.12958
TIMP1	0.788513	4.27136	2.35046e-05	0.00252565	2.41964
