# Supplementary material for: Identification of gene expression and DNA methylation of SERPINA5 and TIMP1 as novel prognostic markers in lower-grade gliomas
Source: PeerJ. 2020 Jun 3;8:e9262. doi: 10.7717/peerj.9262 (PMC7275683; doi:10.7717/peerj.9262)
Supplement: Table S5 [file peerj-08-9262-s006.xlsx]

## Sheet: Sheet1
sampleID	SERPINA5	FBXO17_m	TIMP1_m	OS	OS_IND	age_at_initial_pathologic_diagnosis	gender	histological_type	karnofsky_performance_score	ldh1_mutation_found	WHO_Grade
285	1	1	1	1225	0	31	1	1	2	1	1
334	1	2	2	1299	0	35	2	1	2	0	2
352	1	2	1	1291	0	18	1	2	2	0	2
415	1	2	1	1040	0	43	1	1	2	0	1
523	1	2	1	888	0	61	2	2	2	1	1
316	1	1	1	1181	0	31	2	1	2	1	1
348	1	1	1	1144	0	44	2	2	2	1	1
273	1	1	1	1252	0	35	2	2	2	1	1
291	1	2	2	1223	0	51	2	2	2	0	1
253	1	1	1	1658	0	38	2	1	2	1	1
543	1	1	1	867	0	43	1	2	2	1	1
589	1	1	2	816	0	33	1	2	2	1	1
579	1	2	2	831	0	43	2	2	2	1	1
418	1	2	2	1035	0	46	1	2	2	0	1
671	1	1	1	711	0	37	2	2	2	1	1
598	1	1	1	961	0	62	2	2	2	1	2
323	1	2	1	1172	0	49	2	2	2	0	1
736	1	1	1	629	0	38	1	1	2	1	1
469	1	1	1	978	0	30	1	1	2	1	1
378	1	1	1	1095	0	51	1	2	2	1	1
662	1	1	1	300	1	59	2	2	2	1	1
514	1	1	1	901	0	53	2	2	2	0	1
544	1	1	1	882	0	45	2	1	2	1	1
447	1	1	2	1007	0	20	2	1	2	1	1
558	1	1	2	613	1	35	1	2	2	1	2
441	1	1	1	993	0	32	2	1	2	1	1
317	1	1	1	1180	0	43	2	1	2	1	1
411	1	1	1	1051	0	36	1	2	2	1	1
490	1	1	1	1097	0	38	2	2	2	1	2
191	1	2	1	1377	0	51	1	2	2	1	1
455	1	1	1	984	0	46	2	2	2	0	1
753	1	1	1	613	0	24	1	1	2	1	1
275	1	2	1	1221	0	44	2	2	2	0	1
712	1	1	1	661	0	25	1	1	2	1	1
590	1	1	2	830	0	37	1	1	2	1	1
484	1	2	1	941	0	32	2	2	2	1	1
672	1	1	1	711	0	22	1	2	2	1	1
485	1	2	2	937	0	31	1	2	2	1	1
412	1	2	2	280	0	43	2	1	2	1	2
583	1	2	1	840	0	37	2	1	2	1	1
635	1	2	1	759	0	45	1	2	2	1	1
592	1	1	1	826	0	47	1	1	2	1	1
357	1	1	1	1132	0	38	2	1	2	1	1
403	1	1	2	1165	0	43	1	2	2	1	2
623	1	1	1	804	0	45	1	2	2	1	1
792	1	2	1	557	0	33	1	1	2	1	1
519	1	1	1	895	0	37	2	2	2	1	1
281	1	1	1	1235	0	37	2	1	2	1	1
528	1	2	1	886	0	53	2	2	2	1	1
399	1	1	1	1063	0	36	1	1	2	1	1
674	1	2	1	710	0	32	1	2	2	1	1
396	1	2	2	376	1	50	2	1	1	0	1
610	1	2	2	790	0	25	2	1	2	0	1
440	1	2	2	993	0	45	1	1	2	0	1
446	1	1	1	997	0	35	2	2	2	1	1
648	1	1	1	754	0	34	2	1	2	1	1
498	1	2	2	356	1	38	1	2	2	1	2
364	1	1	1	878	1	32	1	2	2	1	2
395	1	1	1	1076	0	54	1	1	2	0	1
482	1	1	2	942	0	46	1	2	2	0	1
398	1	2	1	1063	0	28	1	2	2	0	1
711	1	1	2	662	0	50	1	1	2	1	1
776	1	1	1	587	0	49	2	1	2	1	1
639	1	2	1	752	0	47	1	2	2	1	1
522	1	2	2	908	0	25	2	1	2	1	1
407	2	1	1	1054	0	33	1	1	2	1	1
615	2	1	1	782	0	40	2	2	2	1	1
500	2	1	2	926	0	36	2	2	2	0	1
571	2	1	1	854	0	39	1	1	2	1	1
353	2	2	2	530	1	60	2	1	2	1	2
321	2	1	1	1173	0	42	1	1	2	0	1
365	2	2	1	260	1	32	2	1	2	1	1
566	2	1	1	845	0	41	1	1	2	0	1
402	2	1	1	1061	0	53	1	1	2	1	1
692	2	2	1	689	0	20	1	1	2		1
434	2	1	2	1012	0	35	1	1	2	1	1
601	2	1	1	818	0	36	1	1	2	1	1
393	2	1	2	463	0	66	1	2	1	1	2
708	2	1	1	663	0	38	2	1	2	1	1
743	2	1	2	622	0	30	1	1	2	1	1
542	2	2	2	887	0	25	1	1	2	0	1
663	2	1	1	721	0	29	2	1	2	0	1
659	2	2	1	725	0	51	2	2	2	0	1
296	2	1	1	1215	0	48	1	2	2	0	1
232	2	1	2	429	1	28	1	2	2	0	2
461	2	2	1	991	0	36	1	1	2	1	1
784	2	2	2	579	0	47	1	1	2	0	1
315	2	1	1	1182	0	33	2	2	2	1	1
379	2	1	2	1091	0	40	2	1	2	1	1
312	2	1	2	840	1	35	2	2	2	1	1
770	2	2	1	594	0	30	1	1	2	0	1
595	2	2	2	825	0	52	2	1	2	1	1
489	2	2	2	653	0	32	1	2	2	1	2
314	2	1	1	1341	0	39	1	2	2	1	2
231	2	2	2	145	1	60	1	2	2	0	2
391	2	1	2	1234	0	29	2	2	2	1	2
459	2	1	2	977	0	44	1	1	2	1	1
673	2	2	2	437	1	54	1	1	2	0	1
548	2	1	2	875	0	39	1	1	2	1	1
406	2	2	2	290	1	25	2	2	2	1	2
508	2	2	2	285	1	18	2	2	2	1	2
271	2	2	2	1256	0	42	1	1	2	0	1
329	2	2	2	419	1	42	1	2	2	0	2
513	2	2	2	1062	0	45	2	2	2	0	2
626	2	2	2	784	0	21	1	1	2	0	1
259	2	2	2	549	1	27	2	2	2	0	2
405	2	2	2	497	1	59	1	1	2	1	2
260	2	2	2	567	1	50	2	2	2	1	2
492	2	2	2	652	0	28	1	2	2	1	2
331	2	1	2	1304	0	28	2	1	2	0	2
474	2	2	2	1104	0	45	1	2	2	1	2
767	2	1	2	598	0	36	1	1	2		1
746	2	2	2	619	0	45	1	1	2	0	1
562	2	2	2	290	1	62	2	2	2	0	2
387	2	2	2	1084	0	52	2	2	2	1	1
351	2	2	2	742	1	35	2	2	2	0	2
577	2	2	1	526	0	39	2	2	2	0	2
505	2	2	2	923	0	37	1	1	2	1	1
596	2	1	2	962	0	61	1	2	2	0	2
633	2	2	1	761	0	56	2	2	2	0	1
266	2	2	2	1265	0	38	1	2	2	0	1
438	2	2	2	777	1	54	1	2	2	1	2
354	2	2	2	145	0	62	1	1	2	1	2
249	2	2	2	312	1	42	1	1	2	0	2
282	2	1	2	240	1	44	1	2	1	1	1
258	2	2	2	1163	1	62	2	1	2	0	1
688	2	2	2	692	0	19	1	1	2	0	1
476	2	2	2	1089	1	38	2	1	1	0	2
433	2	2	2	1013	0	31	1	1	2	1	1
552	2	2	2	873	0	37	2	1	2	0	1
718	2	2	2	655	0	18	1	1	2	1	1
