# Supplementary material for: Identification of gene expression and DNA methylation of SERPINA5 and TIMP1 as novel prognostic markers in lower-grade gliomas
Source: PeerJ. 2020 Jun 3;8:e9262. doi: 10.7717/peerj.9262 (PMC7275683; doi:10.7717/peerj.9262)
Supplement: Table S6 [file peerj-08-9262-s007.xlsx]

## Sheet: meth
ProbID	EFEMP2_cg02403180	EFEMP2_cg02586730	EFEMP2_cg06065225	EFEMP2_cg11944428	EMP3_cg03208951	EMP3_cg01795122	EMP3_cg23344780	EMP3_cg02871614	EMP3_cg19805953	FBXO17_cg08820801	FBXO17_cg03724964	FBXO17_cg14206172	METTL7B_cg07805981	METTL7B_cg25678745	SERPINA5_cg15509705	SSTR5_cg04913730	SSTR5_cg06422039	TIMP1_cg27151711	TIMP1_cg16523424	TIMP1_cg04791822	TMEM61_cg01189112	TMEM61_cg08937380	TMEM61_cg20082904	VAV3_cg06710195	VAV3_cg06942111
TCGA_CS_4938_01	0.7484	0.8319	0.6731	0.4611	0.7832	0.4618	0.5412	0.2265	0.9123	0.7821	0.8858	0.5283	0.73	0.4499	0.6167	0.8055	0.9668	0.7993	0.7417	0.9381	0.4556	0.6534	0.7658	0.4808	0.8816
TCGA_CS_4941_01	0.0377	0.3902	0.0181	0.0447	0.0287	0.0782	0.297	0.0142	0.1973	0.3067	0.1435	0.0356	0.0978	0.1414	0.1468	0.0866	0.3995	0.0327	0.0889	0.113	0.0904	0.1021	0.5154	0.3041	0.6199
TCGA_CS_4942_01	0.5241	0.7049	0.5456	0.2383	0.7414	0.6058	0.7289	0.5065	0.5149	0.7281	0.6109	0.4282	0.5151	0.5993	0.5043	0.8081	0.9431	0.7877	0.4841	0.9058	0.645	0.4007	0.5087	0.3454	0.9153
TCGA_CS_4943_01	0.926	0.8318	0.8705	0.8113	0.8931	0.801	0.8236	0.7267	0.6546	0.8005	0.8915	0.5973	0.7824	0.5995	0.4156	0.5487	0.9775	0.9636	0.9283	0.9257	0.6564	0.7517	0.8443	0.398	0.9105
TCGA_CS_4944_01	0.0392	0.4431	0.0151	0.0466	0.7041	0.5642	0.7106	0.5035	0.2067	0.1748	0.1002	0.3936	0.0668	0.1628	0.602	0.7388	0.8599	0.8106	0.7369	0.8978	0.6133	0.5306	0.6821	0.413	0.556
TCGA_CS_5390_01	0.3959	0.7608	0.584	0.1628	0.8605	0.6924	0.8305	0.6194	0.3317	0.7194	0.7783	0.6526	0.4281	0.4822	0.5772	0.6776	0.8719	0.9424	0.8572	0.9373	0.5999	0.5143	0.7758	0.7854	0.8713
TCGA_CS_5393_01	0.5996	0.6803	0.1807	0.1833	0.8059	0.6535	0.7939	0.5853	0.5441	0.6287	0.7448	0.5349	0.1918	0.412	0.4709	0.6908	0.872	0.8666	0.7842	0.8684	0.6222	0.4868	0.7865	0.2888	0.4953
TCGA_CS_5394_01	0.6142	0.7921	0.5729	0.3164	0.9056	0.7678	0.8808	0.7716	0.8557	0.7817	0.8354	0.7822	0.6127	0.7847	0.5166	0.7363	0.9002	0.9586	0.9086	0.9394	0.7489	0.2976	0.8017	0.9177	0.9466
TCGA_CS_5395_01	0.054	0.1977	0.0198	0.0537	0.0786	0.0843	0.3833	0.0282	0.0741	0.1203	0.0682	0.0188	0.0833	0.1	0.2533	0.5521	0.1187	0.0301	0.0943	0.0816	0.2436	0.3518	0.4713	0.2617	0.3142
TCGA_CS_5396_01	0.0971	0.7613	0.2376	0.0453	0.8303	0.706	0.765	0.6141	0.6505	0.8073	0.801	0.3021	0.3096	0.4629	0.3403	0.4502	0.9575	0.9289	0.8544	0.9302	0.5417	0.1009	0.778	0.8074	0.8379
TCGA_CS_5397_01	0.0401	0.2788	0.0174	0.0603	0.0709	0.1242	0.2491	0.0365	0.2263	0.2028	0.0604	0.0295	0.1486	0.1355	0.4069	0.0886	0.3241	0.6443	0.5506	0.7316	0.0744	0.0648	0.2487	0.3197	0.4065
TCGA_CS_6186_01	0.0173	0.2556	0.0127	0.0733	0.0207	0.0476	0.3696	0.0107	0.3417	0.1341	0.0591	0.0135	0.0584	0.0778	0.3476	0.1128	0.6002	0.0327	0.059	0.0788	0.1017	0.4485	0.6331	0.2067	0.4931
TCGA_CS_6188_01	0.0309	0.3189	0.0161	0.0555	0.0202	0.0919	0.2637	0.0123	0.162	0.1546	0.0768	0.0154	0.0815	0.0898	0.1423	0.0721	0.4095	0.0508	0.0754	0.0888	0.0824	0.0466	0.2965	0.3356	0.4369
TCGA_CS_6290_01	0.3109	0.675	0.2664	0.1437	0.6999	0.5513	0.6622	0.3395	0.448	0.5667	0.5979	0.3386	0.3551	0.4631	0.4946	0.6699	0.9114	0.7042	0.7387	0.8273	0.3627	0.2155	0.6252	0.3121	0.6146
TCGA_CS_6665_01	0.643	0.6223	0.1811	0.3966	0.7049	0.5121	0.5889	0.2112	0.5219	0.4777	0.7225	0.5584	0.0671	0.3619	0.427	0.0895	0.2847	0.853	0.7248	0.9225	0.2452	0.5523	0.6092	0.3325	0.8051
TCGA_CS_6666_01	0.6441	0.5371	0.4817	0.4735	0.8967	0.4882	0.8538	0.5711	0.2481	0.7171	0.9218	0.8884	0.1706	0.5774	0.4831	0.8307	0.8523	0.9595	0.9452	0.9325	0.6919	0.0807	0.8188	0.1943	0.8324
TCGA_CS_6667_01	0.829	0.7404	0.6583	0.6107	0.8599	0.7033	0.782	0.6125	0.7154	0.7208	0.8159	0.648	0.4678	0.4383	0.5796	0.7568	0.9068	0.669	0.5745	0.7557	0.7014	0.6859	0.7612	0.3577	0.9521
TCGA_CS_6668_01	0.7263	0.8667	0.6774	0.4509	0.9537	0.86	0.9388	0.8647	0.9116	0.8907	0.9443	0.8362	0.4836	0.504	0.5017	0.9038	0.9719	0.982	0.9305	0.9597	0.4099	0.8313	0.9067	0.8463	0.8824
TCGA_CS_6669_01	0.0213	0.3016	0.015	0.0742	0.2604	0.2327	0.7498	0.0727	0.3757	0.1499	0.0613	0.0241	0.2965	0.2548	0.2519	0.2029	0.5108	0.2487	0.35	0.5455	0.1064	0.0835	0.135	0.4405	0.7271
TCGA_CS_6670_01	0.5977	0.7718	0.2437	0.0611	0.7851	0.6534	0.8745	0.6886	0.8108	0.6779	0.8256	0.211	0.5157	0.419	0.5372	0.6904	0.9396	0.9281	0.8837	0.9269	0.6019	0.6263	0.6974	0.8022	0.8451
TCGA_DB_5270_01	0.0577	0.629	0.2283	0.0621	0.7092	0.4754	0.6897	0.4501	0.3632	0.5636	0.4988	0.1045	0.4161	0.1921	0.4673	0.6173	0.7824	0.6038	0.478	0.8105	0.3536	0.5317	0.6523	0.4537	0.6838
TCGA_DB_5273_01	0.5537	0.7375	0.1765	0.2637	0.7686	0.6202	0.6284	0.4528	0.7061	0.5678	0.553	0.5252	0.0817	0.3682	0.5353	0.7058	0.9112	0.7965	0.762	0.8844	0.5348	0.5618	0.6114	0.426	0.6989
TCGA_DB_5274_01	0.5019	0.7123	0.5955	0.3519	0.7995	0.6571	0.835	0.5695	0.1331	0.6769	0.7545	0.5314	0.4606	0.2869	0.6221	0.7474	0.7621	0.8905	0.7828	0.9195	0.5981	0.6004	0.6999	0.7084	0.9165
TCGA_DB_5275_01	0.8946	0.8113	0.7198	0.8061	0.8404	0.7187	0.8223	0.543	0.5936	0.8155	0.8937	0.6068	0.6122	0.7267	0.6472	0.5279	0.9607	0.9253	0.889	0.9389	0.7203	0.76	0.8137	0.6473	0.9027
TCGA_DB_5276_01	0.4712	0.5758	0.2859	0.1912	0.622	0.3643	0.7198	0.4116	0.1092	0.4065	0.4243	0.1548	0.3971	0.3665	0.4102	0.5489	0.7105	0.574	0.5599	0.733	0.3212	0.2219	0.5393	0.6089	0.665
TCGA_DB_5277_01	0.8652	0.7714	0.5516	0.6676	0.3069	0.5126	0.8183	0.0328	0.6403	0.6399	0.8237	0.661	0.0848	0.4963	0.4358	0.8318	0.9015	0.9325	0.8893	0.9179	0.3433	0.7111	0.7935	0.3242	0.9037
TCGA_DB_5278_01	0.0656	0.5973	0.0281	0.0571	0.6988	0.4713	0.798	0.2351	0.1949	0.5915	0.5723	0.0918	0.4002	0.4514	0.3518	0.6186	0.8159	0.8193	0.7743	0.8614	0.5244	0.3751	0.5838	0.704	0.9002
TCGA_DB_5279_01	0.9238	0.7485	0.6196	0.4747	0.8482	0.7202	0.844	0.4821	0.1807	0.7483	0.8362	0.6386	0.0628	0.1318	0.4096	0.8053	0.6447	0.9524	0.8888	0.9457	0.6708	0.6896	0.8252	0.8157	0.3149
TCGA_DB_5280_01	0.6549	0.7999	0.4328	0.481	0.9061	0.6526	0.8327	0.4075	0.5745	0.8119	0.8577	0.8071	0.1494	0.4547	0.4624	0.8163	0.9145	0.9385	0.906	0.9153	0.6942	0.723	0.8111	0.8176	0.9019
TCGA_DB_5281_01	0.4998	0.8083	0.718	0.1817	0.8873	0.7523	0.8254	0.723	0.84	0.7699	0.8395	0.8186	0.3516	0.7171	0.4967	0.8662	0.9451	0.866	0.8736	0.8962	0.3952	0.7182	0.8163	0.6017	0.6248
TCGA_DB_A4X9_01	0.5932	0.7265	0.2932	0.3178	0.865	0.7056	0.8243	0.3263	0.5696	0.7514	0.8768	0.4767	0.0719	0.15	0.6709	0.8294	0.9809	0.9366	0.5419	0.9406	0.3756	0.4619	0.7255	0.6311	0.89
TCGA_DB_A4XA_01	0.5876	0.6128	0.3779	0.28	0.7401	0.5166	0.7207	0.376	0.5179	0.6376	0.7013	0.4031	0.1633	0.2657	0.2223	0.6841	0.8753	0.8457	0.791	0.914	0.4913	0.224	0.5483	0.4446	0.8313
TCGA_DB_A4XB_01	0.0305	0.2309	0.0144	0.0433	0.8604	0.6729	0.8061	0.6013	0.6764	0.1593	0.0949	0.2715	0.3987	0.4487	0.6323	0.5416	0.9798	0.9573	0.89	0.9248	0.5444	0.4467	0.5893	0.1733	0.8198
TCGA_DB_A4XC_01	0.7019	0.6622	0.4494	0.431	0.7514	0.6333	0.7611	0.5861	0.355	0.6215	0.6916	0.5976	0.5051	0.3856	0.5456	0.7524	0.9034	0.8361	0.7826	0.8294	0.5525	0.6264	0.6111	0.544	0.832
TCGA_DB_A4XD_01	0.5969	0.7745	0.5216	0.4564	0.8864	0.5335	0.8263	0.578	0.8115	0.7526	0.817	0.6483	0.2848	0.506	0.6223	0.817	0.9298	0.9262	0.9032	0.9104	0.7025	0.6087	0.8758	0.5261	0.8853
TCGA_DB_A4XE_01	0.4021	0.6388	0.4764	0.3989	0.8762	0.4597	0.7962	0.6827	0.1986	0.709	0.7778	0.481	0.4656	0.4294	0.6271	0.7638	0.9659	0.9322	0.7789	0.9157	0.4298	0.6793	0.6801	0.4463	0.8189
TCGA_DB_A4XF_01	0.8868	0.5543	0.7412	0.4926	0.8707	0.455	0.7733	0.5976	0.7101	0.7737	0.8432	0.8477	0.496	0.6704	0.435	0.8283	0.9625	0.9273	0.8433	0.9296	0.4192	0.7207	0.7905	0.3244	0.7159
TCGA_DB_A4XG_01	0.6612	0.7493	0.4559	0.3012	0.9023	0.7308	0.8332	0.407	0.4783	0.7576	0.9265	0.2874	0.534	0.6222	0.4827	0.893	0.963	0.9701	0.9134	0.9196	0.7196	0.7614	0.8556	0.8158	0.7306
TCGA_DB_A4XH_01	0.5253	0.6473	0.4394	0.4588	0.8292	0.4966	0.8497	0.6553	0.8489	0.6377	0.7576	0.5861	0.8122	0.4805	0.1999	0.81	0.906	0.9187	0.7868	0.9283	0.5898	0.4594	0.7953	0.5648	0.9149
TCGA_DB_A64L_01	0.8188	0.7302	0.6278	0.4543	0.7358	0.6156	0.6752	0.5671	0.5882	0.6299	0.7434	0.4625	0.4401	0.5539	0.1912	0.5129	0.875	0.872	0.7623	0.9223	0.5131	0.6018	0.677	0.6733	0.7997
TCGA_DB_A64O_01	0.0284	0.3557	0.0182	0.0503	0.1473	0.13	0.2512	0.0385	0.0967	0.2406	0.1262	0.0326	0.1361	0.0998	0.1734	0.2433	0.7416	0.0481	0.0877	0.1454	0.042	0.0775	0.289	0.3106	0.4964
TCGA_DB_A64P_01	0.6803	0.7326	0.71	0.4972	0.7978	0.6445	0.7663	0.6382	0.1279	0.6862	0.7933	0.733	0.7278	0.617	0.5326	0.8364	0.8962	0.9235	0.8922	0.902	0.5881	0.5181	0.7429	0.6829	0.8152
TCGA_DB_A64Q_01	0.035	0.6712	0.0224	0.0598	0.7786	0.6086	0.8213	0.5171	0.7828	0.6706	0.7257	0.6843	0.5659	0.4189	0.42	0.5174	0.5685	0.8905	0.8183	0.9346	0.5852	0.6122	0.6392	0.4625	0.6578
TCGA_DB_A64R_01	0.0818	0.8283	0.1023	0.0864	0.8946	0.7001	0.8445	0.3969	0.7877	0.8089	0.673	0.2062	0.6821	0.5161	0.7301	0.8653	0.9465	0.6564	0.5795	0.9473	0.7038	0.1069	0.7198	0.9046	0.9209
TCGA_DB_A64S_01	0.6511	0.462	0.5218	0.6794	0.5972	0.6333	0.7414	0.4276	0.4468	0.6044	0.61	0.5136	0.7645	0.5991	0.1778	0.7371	0.8935	0.8583	0.8164	0.8822	0.185	0.456	0.6345	0.7187	0.9171
TCGA_DB_A64U_01	0.7567	0.6549	0.478	0.5604	0.7277	0.5439	0.7759	0.5187	0.7424	0.5358	0.6614	0.1694	0.1738	0.477	0.5389	0.7125	0.8564	0.8756	0.759	0.9222	0.508	0.5929	0.6383	0.5738	0.8157
TCGA_DB_A64V_01	0.5884	0.5977	0.4463	0.4387	0.6478	0.4565	0.6981	0.4691	0.2377	0.4897	0.5422	0.1454	0.2801	0.278	0.4459	0.653	0.7155	0.7442	0.641	0.8035	0.4117	0.5041	0.5852	0.5718	0.6718
TCGA_DB_A64W_01	0.8914	0.7494	0.7295	0.6045	0.8826	0.7109	0.8531	0.7168	0.7996	0.6656	0.7714	0.7832	0.5535	0.735	0.6885	0.8355	0.9188	0.9432	0.8829	0.9403	0.6012	0.7269	0.7381	0.7936	0.9221
TCGA_DB_A64X_01	0.5465	0.6179	0.3707	0.3511	0.899	0.4886	0.804	0.6583	0.142	0.7731	0.8438	0.7911	0.0714	0.3382	0.4562	0.8854	0.9537	0.7644	0.5773	0.9353	0.6664	0.7348	0.7619	0.311	0.4883
TCGA_DB_A75K_01	0.4309	0.7074	0.1633	0.0633	0.8147	0.6086	0.8415	0.647	0.7808	0.6584	0.4955	0.4959	0.1666	0.5666	0.6627	0.7859	0.8818	0.7978	0.4794	0.9194	0.5571	0.4065	0.7786	0.807	0.5788
TCGA_DB_A75L_01	0.8732	0.738	0.6098	0.5831	0.8232	0.6519	0.785	0.6414	0.8094	0.6888	0.7747	0.7009	0.3031	0.6523	0.3972	0.7857	0.891	0.8624	0.8382	0.912	0.0857	0.3807	0.7779	0.5023	0.8407
TCGA_DB_A75M_01	0.8171	0.769	0.3962	0.614	0.8562	0.4175	0.7495	0.6035	0.85	0.7178	0.8306	0.7138	0.0611	0.1193	0.4656	0.5774	0.8686	0.9305	0.8698	0.8974	0.6311	0.682	0.7269	0.488	0.645
TCGA_DB_A75O_01	0.0253	0.5281	0.0184	0.0496	0.7667	0.4375	0.7686	0.5636	0.6399	0.5009	0.3885	0.6982	0.102	0.3076	0.5469	0.6671	0.9465	0.8309	0.8586	0.9007	0.413	0.4622	0.7367	0.6399	0.5632
TCGA_DB_A75P_01	0.0238	0.3687	0.0177	0.0481	0.1746	0.1432	0.252	0.0334	0.141	0.2726	0.1739	0.0257	0.1334	0.1194	0.2252	0.157	0.4383	0.2714	0.2151	0.5186	0.1287	0.0913	0.2884	0.3234	0.4306
TCGA_DH_5140_01	0.0764	0.2852	0.0229	0.052	0.0355	0.0828	0.7313	0.0156	0.0633	0.2034	0.1184	0.073	0.0432	0.1067	0.2894	0.0412	0.0682	0.6965	0.5528	0.9041	0.3428	0.1301	0.5662	0.3237	0.4337
TCGA_DH_5141_01	0.6916	0.7169	0.539	0.4983	0.7248	0.3746	0.7997	0.5406	0.6093	0.6903	0.6831	0.4221	0.6543	0.5168	0.4414	0.7503	0.8312	0.8478	0.7663	0.8856	0.5407	0.4741	0.6479	0.4949	0.8798
TCGA_DH_5142_01	0.512	0.5563	0.3502	0.2788	0.8082	0.6601	0.7491	0.1219	0.0535	0.8406	0.8035	0.7259	0.0562	0.2042	0.4954	0.8529	0.8031	0.878	0.8507	0.8856	0.6058	0.2224	0.7053	0.2602	0.6973
TCGA_DH_5143_01	0.6112	0.7878	0.432	0.2344	0.8401	0.5454	0.7488	0.5033	0.8087	0.7721	0.8106	0.745	0.6731	0.667	0.6155	0.7971	0.8745	0.8283	0.8271	0.9308	0.4378	0.673	0.7753	0.4898	0.8748
TCGA_DH_5144_01	0.559	0.7257	0.2782	0.2649	0.8957	0.4079	0.8765	0.3053	0.8425	0.8589	0.9084	0.7986	0.2696	0.4683	0.5216	0.8843	0.9026	0.963	0.9089	0.964	0.7435	0.7615	0.8413	0.8828	0.6825
TCGA_DH_A669_01	0.9314	0.8166	0.7163	0.641	0.8922	0.7367	0.7878	0.7897	0.8508	0.8212	0.8929	0.8746	0.1112	0.4332	0.4268	0.8569	0.9342	0.975	0.9218	0.9223	0.6479	0.7447	0.8849	0.6266	0.2681
TCGA_DH_A669_02	0.9253	0.7856	0.7305	0.4733	0.8917	0.7387	0.7992	0.7622	0.8048	0.809	0.8971	0.8091	0.0529	0.5308	0.3418	0.8498	0.9391	0.9697	0.8816	0.9101	0.6821	0.7534	0.8404	0.7828	0.5317
TCGA_DH_A66B_01	0.8471	0.8088	0.689	0.4922	0.7205	0.6674	0.6982	0.4475	0.6023	0.7737	0.6959	0.5871	0.582	0.331	0.3859	0.7378	0.9676	0.8434	0.8662	0.8438	0.5802	0.6935	0.7816	0.4031	0.7339
TCGA_DH_A66D_01	0.5114	0.8399	0.5544	0.4221	0.8099	0.6915	0.6892	0.6858	0.3481	0.7985	0.8811	0.7264	0.4465	0.1997	0.618	0.7831	0.9728	0.9116	0.5208	0.9303	0.6341	0.6762	0.7671	0.5215	0.8791
TCGA_DH_A66F_01	0.1092	0.76	0.2008	0.1103	0.836	0.7071	0.8585	0.6996	0.1979	0.7286	0.8465	0.6874	0.1751	0.4402	0.5916	0.7652	0.9416	0.9423	0.913	0.9361	0.6677	0.1821	0.8391	0.3869	0.8568
TCGA_DH_A66G_01	0.6145	0.7346	0.5387	0.4112	0.7613	0.4555	0.6696	0.5564	0.2711	0.684	0.7658	0.6768	0.7427	0.575	0.5857	0.7458	0.9242	0.8348	0.5566	0.8976	0.5409	0.6668	0.6991	0.6136	0.7733
TCGA_DH_A7UR_01	0.7256	0.4932	0.4369	0.4547	0.6754	0.497	0.7231	0.5141	0.5972	0.5676	0.5979	0.3411	0.4323	0.2835	0.3278	0.6673	0.8017	0.819	0.6156	0.8879	0.3969	0.4678	0.6452	0.8177	0.8811
TCGA_DH_A7US_01	0.0263	0.6156	0.0194	0.0591	0.7007	0.4923	0.7458	0.5493	0.8022	0.5539	0.6317	0.5481	0.3531	0.2934	0.4335	0.5627	0.851	0.8768	0.7617	0.8703	0.467	0.3786	0.7414	0.5999	0.7169
TCGA_DH_A7UT_01	0.0236	0.496	0.0186	0.0613	0.4581	0.3805	0.7076	0.2087	0.5922	0.6274	0.779	0.4283	0.108	0.1883	0.369	0.68	0.8658	0.8503	0.7754	0.8806	0.5216	0.6177	0.5998	0.3659	0.792
TCGA_DH_A7UU_01	0.8794	0.8145	0.5814	0.6211	0.8475	0.7535	0.8383	0.7426	0.7001	0.6957	0.8186	0.2575	0.5156	0.7274	0.1516	0.8266	0.5932	0.9352	0.8752	0.9336	0.6904	0.7504	0.7979	0.2534	0.9093
TCGA_DH_A7UV_01	0.8945	0.749	0.615	0.7883	0.8511	0.6661	0.7797	0.5641	0.4007	0.7916	0.8723	0.7743	0.8265	0.6918	0.6347	0.8392	0.9611	0.9216	0.9127	0.8912	0.6677	0.7228	0.8496	0.8627	0.6321
TCGA_DU_5847_01	0.0236	0.2997	0.0158	0.0396	0.0176	0.0402	0.1645	0.0147	0.0345	0.1756	0.1068	0.0292	0.0489	0.0595	0.165	0.1262	0.2902	0.3514	0.1859	0.682	0.1034	0.0544	0.2273	0.2147	0.291
TCGA_DU_5849_01	0.4892	0.5922	0.4393	0.151	0.681	0.2947	0.7792	0.2541	0.1967	0.4709	0.5577	0.1353	0.6029	0.5342	0.4956	0.4286	0.7907	0.784	0.7246	0.7359	0.4308	0.3971	0.6299	0.6958	0.7972
TCGA_DU_5851_01	0.3407	0.6188	0.2797	0.3065	0.5138	0.2467	0.718	0.3163	0.4696	0.3447	0.3986	0.0374	0.3997	0.3366	0.4257	0.3365	0.803	0.7787	0.5349	0.8384	0.3435	0.5362	0.5192	0.2975	0.5364
TCGA_DU_5852_01	0.0202	0.2475	0.0146	0.0903	0.0203	0.0588	0.1749	0.0164	0.0641	0.1441	0.0655	0.0216	0.0667	0.0852	0.1087	0.0662	0.13	0.633	0.4265	0.5639	0.2789	0.4315	0.3559	0.2541	0.4142
TCGA_DU_5853_01	0.1004	0.6051	0.1131	0.077	0.1968	0.4876	0.7988	0.401	0.4723	0.8612	0.7572	0.7897	0.3018	0.2088	0.5941	0.7841	0.8374	0.911	0.891	0.7058	0.4777	0.7089	0.7868	0.3587	0.8768
TCGA_DU_5854_01	0.0282	0.3348	0.0135	0.0653	0.0825	0.131	0.3455	0.0454	0.2588	0.1733	0.0865	0.0269	0.0889	0.1187	0.2395	0.1437	0.2529	0.5528	0.4174	0.6284	0.0753	0.2232	0.1713	0.275	0.4267
TCGA_DU_5855_01	0.8043	0.7579	0.5183	0.3761	0.7733	0.3608	0.4655	0.5678	0.6754	0.6593	0.6917	0.7486	0.5912	0.2446	0.5156	0.7576	0.9799	0.8788	0.7741	0.9225	0.4151	0.6238	0.7481	0.7283	0.8436
TCGA_DU_5870_01	0.6435	0.6901	0.5505	0.3597	0.7249	0.5918	0.7582	0.5718	0.699	0.5717	0.7219	0.4943	0.2696	0.3621	0.5217	0.7056	0.8364	0.846	0.7493	0.903	0.4787	0.5311	0.6917	0.7858	0.6669
TCGA_DU_5870_02	0.915	0.6926	0.6875	0.2621	0.7457	0.663	0.8209	0.6792	0.7991	0.5874	0.8405	0.7069	0.1622	0.4119	0.475	0.5206	0.7963	0.8457	0.4931	0.9204	0.6019	0.6564	0.8109	0.2709	0.8102
TCGA_DU_5871_01	0.8236	0.7166	0.5717	0.5735	0.359	0.1079	0.754	0.0807	0.2515	0.7401	0.8273	0.4971	0.4268	0.6182	0.3568	0.7287	0.9091	0.9035	0.7824	0.9303	0.3703	0.4763	0.7807	0.2514	0.9256
TCGA_DU_5872_01	0.0476	0.702	0.15	0.0598	0.8019	0.4823	0.7762	0.3259	0.6603	0.6764	0.7229	0.678	0.1361	0.1797	0.6185	0.7048	0.8757	0.8335	0.5616	0.9044	0.6421	0.4652	0.6413	0.7321	0.6368
TCGA_DU_5872_02	0.028	0.5615	0.0426	0.0487	0.227	0.1229	0.3064	0.0913	0.1599	0.5009	0.4789	0.2588	0.1988	0.2406	0.163	0.4061	0.6902	0.3304	0.3155	0.6512	0.226	0.2887	0.3303	0.4401	0.6477
TCGA_DU_5874_01	0.4484	0.8165	0.4193	0.377	0.9251	0.67	0.9116	0.5465	0.9135	0.788	0.8699	0.8525	0.5392	0.2444	0.7497	0.8979	0.9381	0.9786	0.9247	0.944	0.7262	0.7734	0.9062	0.9298	0.921
TCGA_DU_6392_01	0.0199	0.2493	0.0122	0.0482	0.2279	0.1591	0.6181	0.0851	0.4725	0.1802	0.1088	0.0485	0.1778	0.1122	0.1014	0.0774	0.1967	0.6347	0.5081	0.7183	0.2237	0.2203	0.4149	0.2621	0.7165
TCGA_DU_6393_01	0.3758	0.824	0.5849	0.2642	0.9427	0.748	0.8805	0.7728	0.8703	0.7992	0.8934	0.8602	0.8975	0.8218	0.721	0.8809	0.9753	0.9735	0.9359	0.8964	0.73	0.7937	0.8551	0.3922	0.9247
TCGA_DU_6394_01	0.8643	0.7966	0.8428	0.5682	0.8489	0.285	0.8516	0.7863	0.8091	0.797	0.916	0.8631	0.0722	0.158	0.2662	0.8611	0.9575	0.9641	0.9112	0.9267	0.6804	0.7574	0.8627	0.4633	0.6571
TCGA_DU_6395_01	0.6743	0.7325	0.1368	0.6818	0.8319	0.6882	0.8401	0.5353	0.333	0.7132	0.8258	0.5886	0.0602	0.4093	0.6271	0.8059	0.9488	0.9215	0.8584	0.924	0.6831	0.7049	0.7898	0.7823	0.8928
TCGA_DU_6396_01	0.7849	0.7808	0.4905	0.5409	0.6694	0.5557	0.679	0.1797	0.4744	0.5754	0.5226	0.5894	0.118	0.4879	0.4937	0.6271	0.7169	0.8761	0.7979	0.9268	0.437	0.6442	0.6297	0.2484	0.7652
TCGA_DU_6397_01	0.4795	0.7036	0.545	0.1512	0.7665	0.4033	0.4151	0.6271	0.7019	0.664	0.6606	0.597	0.6173	0.3806	0.5389	0.7794	0.8341	0.8571	0.8164	0.8841	0.5588	0.2997	0.7723	0.473	0.7761
TCGA_DU_6397_02	0.7557	0.691	0.48	0.1223	0.8273	0.6946	0.2055	0.589	0.7608	0.7366	0.802	0.7523	0.0473	0.0913	0.2171	0.8003	0.8287	0.9521	0.8851	0.9093	0.5903	0.1007	0.7884	0.2184	0.8433
TCGA_DU_6399_01	0.8656	0.7035	0.4388	0.7463	0.8512	0.6411	0.8531	0.5855	0.5013	0.5911	0.7327	0.6183	0.0587	0.6004	0.4996	0.7799	0.8735	0.9407	0.9406	0.8729	0.6767	0.7077	0.8468	0.695	0.6928
TCGA_DU_6400_01	0.911	0.7868	0.7197	0.5136	0.89	0.7634	0.8946	0.7682	0.765	0.767	0.8488	0.7949	0.3297	0.6468	0.7638	0.8779	0.9802	0.9678	0.7309	0.934	0.6865	0.7106	0.8593	0.9355	0.8265
TCGA_DU_6401_01	0.0318	0.8284	0.0615	0.0599	0.8032	0.3457	0.911	0.7032	0.6417	0.7365	0.8908	0.5284	0.2815	0.3014	0.4322	0.663	0.9425	0.9027	0.4094	0.9096	0.6321	0.2887	0.6878	0.5076	0.924
TCGA_DU_6402_01	0.029	0.4002	0.0197	0.0486	0.0313	0.0403	0.1269	0.016	0.0873	0.2984	0.2069	0.0446	0.0486	0.0996	0.1275	0.1532	0.4202	0.0373	0.0554	0.0656	0.3659	0.3252	0.3598	0.3467	0.4126
TCGA_DU_6403_01	0.0244	0.1986	0.0147	0.0582	0.0432	0.0962	0.2683	0.0227	0.2033	0.1096	0.0543	0.019	0.057	0.0824	0.0951	0.1217	0.1557	0.2031	0.2958	0.5563	0.0823	0.2201	0.1397	0.2241	0.3505
TCGA_DU_6404_01	0.0283	0.6034	0.027	0.068	0.0913	0.1383	0.5008	0.0372	0.1677	0.2307	0.1672	0.366	0.0637	0.0786	0.2898	0.0747	0.1765	0.6213	0.4193	0.6606	0.1529	0.0778	0.4561	0.2718	0.4607
TCGA_DU_6404_02	0.02225	0.48055	0.01985	0.03645	0.22425	0.16905	0.3246	0.1209	0.1227	0.5865	0.5466	0.47905	0.11195	0.09175	0.2019	0.07985	0.15705	0.43045	0.33345	0.65425	0.1888	0.07205	0.5215	0.28165	0.3634
TCGA_DU_6405_01	0.1294	0.8009	0.039	0.0646	0.1992	0.0747	0.1043	0.0478	0.3718	0.7444	0.0314	0.0395	0.0388	0.0954	0.8546	0.0883	0.1823	0.5554	0.3897	0.6142	0.8818	0.1903	0.8735	0.1613	0.5033
TCGA_DU_6406_01	0.033	0.1674	0.0152	0.0608	0.0209	0.0346	0.1021	0.0136	0.2927	0.0969	0.0443	0.0258	0.039	0.0534	0.0895	0.0399	0.0878	0.6049	0.4607	0.6027	0.2732	0.0438	0.5192	0.1312	0.2248
TCGA_DU_6407_01	0.8819	0.7629	0.5754	0.7645	0.8906	0.735	0.895	0.734	0.8205	0.6517	0.8219	0.7168	0.5599	0.44	0.6569	0.866	0.9752	0.9142	0.8739	0.8996	0.6523	0.4402	0.8468	0.2292	0.8423
TCGA_DU_6407_02	0.436	0.69315	0.38965	0.44475	0.76505	0.5851	0.6063	0.5465	0.6021	0.42535	0.5785	0.4764	0.0924	0.34525	0.4233	0.5991	0.5015	0.83475	0.7275	0.8926	0.44365	0.4626	0.72355	0.16885	0.4656
TCGA_DU_6408_01	0.0334	0.767	0.2513	0.089	0.7384	0.6344	0.7541	0.5044	0.6871	0.7225	0.8601	0.8176	0.0545	0.2081	0.5356	0.8301	0.9337	0.9051	0.8175	0.9018	0.5817	0.596	0.6415	0.2609	0.5864
TCGA_DU_6410_01	0.9768	0.829	0.9199	0.7953	0.9463	0.8503	0.9023	0.8753	0.8723	0.8306	0.9435	0.8694	0.1	0.4782	0.6735	0.91	0.9795	0.975	0.9442	0.9528	0.7152	0.7057	0.7897	0.8912	0.9537
TCGA_DU_6542_01	0.025	0.597	0.2003	0.0754	0.8337	0.672	0.7566	0.5456	0.8882	0.7559	0.8613	0.5714	0.0672	0.2229	0.5554	0.5859	0.976	0.9599	0.9115	0.8723	0.7436	0.6455	0.6592	0.2917	0.7636
TCGA_DU_7006_01	0.0247	0.459	0.0164	0.0546	0.0161	0.0428	0.0849	0.0113	0.0698	0.2774	0.2039	0.0589	0.0491	0.0881	0.1408	0.2935	0.4522	0.3751	0.1948	0.6418	0.1164	0.1679	0.2607	0.3333	0.4425
TCGA_DU_7007_01	0.5979	0.7672	0.6086	0.4425	0.7411	0.4591	0.4294	0.4056	0.3699	0.7418	0.8556	0.7503	0.1634	0.3932	0.5411	0.4733	0.7119	0.8493	0.7906	0.7913	0.4532	0.742	0.6422	0.3284	0.6192
TCGA_DU_7008_01	0.9361	0.83	0.7919	0.4612	0.9453	0.8106	0.8896	0.8029	0.748	0.7473	0.9513	0.8302	0.0519	0.4137	0.4664	0.8795	0.988	0.9146	0.6648	0.9541	0.4188	0.6414	0.7111	0.8341	0.857
TCGA_DU_7009_01	0.0199	0.7558	0.0331	0.0599	0.8384	0.6904	0.8836	0.5379	0.8261	0.6614	0.7914	0.6404	0.259	0.3809	0.4106	0.7847	0.8791	0.9249	0.8375	0.9294	0.6186	0.6589	0.7796	0.616	0.8393
TCGA_DU_7010_01	0.8771	0.6512	0.4696	0.7451	0.8332	0.6808	0.8114	0.362	0.6971	0.582	0.6005	0.6329	0.0854	0.6162	0.2544	0.7864	0.2561	0.9443	0.8248	0.9236	0.6476	0.7662	0.7268	0.159	0.9051
TCGA_DU_7011_01	0.5277	0.5101	0.4569	0.4584	0.6266	0.4257	0.7985	0.415	0.641	0.5443	0.3212	0.403	0.2512	0.408	0.3996	0.6283	0.8945	0.7796	0.7512	0.8676	0.3753	0.3191	0.6865	0.3302	0.7138
TCGA_DU_7012_01	0.0204	0.4594	0.0185	0.0562	0.0337	0.0852	0.1451	0.0218	0.0874	0.3425	0.3559	0.1224	0.1163	0.1448	0.1276	0.1452	0.5276	0.6014	0.4258	0.5961	0.2171	0.1874	0.4077	0.4183	0.7696
TCGA_DU_7013_01	0.0216	0.2441	0.0151	0.0519	0.0695	0.1382	0.5418	0.0224	0.5092	0.1427	0.0556	0.0173	0.052	0.0703	0.099	0.3435	0.1306	0.0261	0.0738	0.0732	0.0691	0.368	0.2317	0.1912	0.3222
TCGA_DU_7014_01	0.8696	0.6739	0.6753	0.746	0.8245	0.5583	0.6526	0.6248	0.5293	0.6697	0.8264	0.6634	0.424	0.6243	0.5072	0.8286	0.9297	0.9025	0.8911	0.9358	0.6879	0.7221	0.765	0.3442	0.6854
TCGA_DU_7015_01	0.7896	0.8424	0.6541	0.7539	0.7951	0.5774	0.7876	0.503	0.9024	0.7522	0.7119	0.6022	0.7635	0.6736	0.6745	0.8011	0.9796	0.899	0.7485	0.9105	0.6782	0.6883	0.7402	0.7602	0.7629
TCGA_DU_7018_01	0.6831	0.7835	0.4907	0.3989	0.8565	0.7529	0.8333	0.7334	0.883	0.6867	0.8127	0.6704	0.7897	0.6898	0.5575	0.8365	0.9284	0.9452	0.8712	0.9391	0.6743	0.7129	0.8345	0.8654	0.9091
TCGA_DU_7019_01	0.7257	0.7249	0.578	0.6462	0.7827	0.6051	0.4577	0.5556	0.4967	0.5895	0.7989	0.6863	0.4118	0.5457	0.537	0.4794	0.8975	0.8137	0.7884	0.8574	0.5502	0.3624	0.8306	0.3076	0.7692
TCGA_DU_7290_01	0.025	0.2831	0.0172	0.0484	0.0232	0.0624	0.255	0.0153	0.0481	0.1872	0.1225	0.0203	0.112	0.1516	0.1464	0.2135	0.2952	0.5798	0.4999	0.6424	0.0744	0.075	0.3086	0.263	0.2964
TCGA_DU_7292_01	0.0185	0.2963	0.0139	0.0364	0.1691	0.157	0.2879	0.0465	0.133	0.1236	0.0661	0.0156	0.1153	0.1258	0.1965	0.3764	0.2703	0.0368	0.1051	0.0897	0.2959	0.1834	0.3158	0.255	0.3769
TCGA_DU_7294_01	0.0788	0.7399	0.0863	0.0794	0.8637	0.6956	0.8406	0.6789	0.8798	0.7337	0.8965	0.3074	0.5106	0.5071	0.6718	0.6156	0.9553	0.9271	0.6477	0.9467	0.5816	0.4863	0.892	0.7819	0.6598
TCGA_DU_7298_01	0.1431	0.68	0.5598	0.1802	0.7573	0.3881	0.7362	0.4258	0.772	0.583	0.7437	0.4633	0.2441	0.2514	0.5114	0.7268	0.9081	0.7186	0.6313	0.8987	0.3672	0.6463	0.7006	0.2927	0.561
TCGA_DU_7299_01	0.5259	0.7778	0.6954	0.4357	0.8453	0.6717	0.7639	0.4927	0.1383	0.6838	0.7745	0.7598	0.7163	0.5434	0.5388	0.8089	0.9426	0.9006	0.86	0.9218	0.619	0.6581	0.7755	0.2427	0.8291
TCGA_DU_7300_01	0.7375	0.6333	0.3853	0.3912	0.652	0.5177	0.6792	0.2486	0.5223	0.4459	0.5621	0.4715	0.489	0.3483	0.4516	0.5397	0.8192	0.7889	0.5226	0.9064	0.4289	0.5269	0.5784	0.7147	0.5489
TCGA_DU_7301_01	0.8266	0.7881	0.7245	0.4696	0.84	0.717	0.819	0.7286	0.8486	0.7552	0.8489	0.7551	0.3408	0.3866	0.6615	0.6159	0.953	0.9453	0.8772	0.9225	0.6298	0.5161	0.813	0.8231	0.9233
TCGA_DU_7302_01	0.6413	0.7369	0.4554	0.3022	0.8023	0.66	0.8257	0.6013	0.7999	0.671	0.7564	0.691	0.7947	0.6773	0.6039	0.5019	0.9281	0.9203	0.5328	0.9293	0.6286	0.6901	0.8165	0.7778	0.8857
TCGA_DU_7304_01	0.7362	0.7032	0.5638	0.5712	0.7934	0.61	0.7639	0.6554	0.7407	0.6364	0.7865	0.618	0.7006	0.3757	0.5431	0.7676	0.8918	0.8651	0.8333	0.8903	0.565	0.6385	0.7565	0.7118	0.9138
TCGA_DU_7304_02	0.9368	0.7124	0.7526	0.8844	0.907	0.8115	0.7539	0.7656	0.8343	0.7313	0.8474	0.5898	0.3788	0.4522	0.1038	0.8906	0.648	0.9755	0.9152	0.8739	0.75	0.765	0.8868	0.528	0.81
TCGA_DU_7306_01	0.0388	0.5354	0.6567	0.3948	0.8853	0.6922	0.7938	0.4651	0.8624	0.7248	0.8014	0.7696	0.511	0.402	0.3708	0.7731	0.9203	0.9206	0.8396	0.9167	0.6416	0.264	0.7452	0.4602	0.5329
TCGA_DU_7309_01	0.4823	0.6137	0.4197	0.5057	0.7803	0.5853	0.7407	0.5523	0.5795	0.5296	0.7311	0.5605	0.7473	0.5583	0.3897	0.6799	0.8338	0.8316	0.5629	0.9077	0.5608	0.6325	0.6885	0.8139	0.9261
TCGA_DU_8158_01	0.0327	0.4313	0.0201	0.0513	0.0321	0.0441	0.264	0.0244	0.0871	0.2848	0.2416	0.0471	0.0771	0.1585	0.2879	0.3741	0.4772	0.4902	0.3761	0.6668	0.2722	0.2757	0.4302	0.3582	0.5645
TCGA_DU_8161_01	0.0433	0.4119	0.0161	0.0625	0.191	0.1771	0.2855	0.064	0.1097	0.3208	0.2489	0.0498	0.0993	0.1439	0.3359	0.1322	0.4515	0.3021	0.2123	0.6396	0.0848	0.0635	0.173	0.3625	0.4611
TCGA_DU_8162_01	0.0312	0.3259	0.0185	0.0609	0.2185	0.2266	0.4699	0.0705	0.2802	0.16	0.0919	0.0276	0.2488	0.1893	0.2768	0.137	0.5591	0.451	0.3595	0.7576	0.1342	0.1618	0.3495	0.3717	0.6058
TCGA_DU_8163_01	0.3708	0.5523	0.3932	0.4063	0.7598	0.5767	0.7124	0.5844	0.5574	0.5848	0.6993	0.6034	0.0673	0.1476	0.3846	0.7262	0.9267	0.7801	0.7901	0.8489	0.517	0.4924	0.6138	0.464	0.8024
TCGA_DU_8164_01	0.6743	0.7277	0.5792	0.5053	0.8505	0.7025	0.8192	0.6941	0.8351	0.6778	0.7935	0.5026	0.6169	0.6488	0.668	0.8555	0.9082	0.924	0.9053	0.9214	0.6518	0.6522	0.8346	0.882	0.8943
TCGA_DU_8165_01	0.0289	0.3573	0.0198	0.0831	0.0224	0.0444	0.1103	0.015	0.0449	0.234	0.1489	0.0344	0.0468	0.1059	0.2468	0.1341	0.3641	0.0626	0.0833	0.4823	0.0833	0.0944	0.3716	0.2334	0.2365
TCGA_DU_8166_01	0.4834	0.7879	0.3329	0.1517	0.8542	0.4869	0.7928	0.5839	0.278	0.7592	0.8635	0.8401	0.7752	0.3994	0.4846	0.857	0.9605	0.9259	0.8229	0.9293	0.6114	0.5971	0.8186	0.4587	0.9184
TCGA_DU_8167_01	0.4856	0.633	0.4782	0.2819	0.6583	0.4381	0.71	0.4062	0.7353	0.699	0.7714	0.7941	0.3547	0.537	0.5601	0.5501	0.9491	0.8801	0.634	0.9305	0.61	0.6628	0.7706	0.5328	0.7452
TCGA_DU_8168_01	0.9613	0.7812	0.8595	0.5393	0.8984	0.7758	0.8827	0.7659	0.9128	0.8332	0.8741	0.8831	0.3089	0.4776	0.5838	0.895	0.9636	0.9748	0.7862	0.941	0.7314	0.7786	0.8397	0.9122	0.8889
TCGA_DU_A5TP_01	0.0339	0.3333	0.0218	0.057	0.7541	0.2448	0.6875	0.5508	0.6922	0.2242	0.1564	0.4326	0.4448	0.5037	0.5936	0.8027	0.9261	0.8737	0.8337	0.8781	0.5824	0.3936	0.7093	0.2901	0.6538
TCGA_DU_A5TR_01	0.7199	0.6465	0.3801	0.5229	0.7486	0.5856	0.6358	0.5304	0.4048	0.6079	0.6931	0.5055	0.4534	0.5194	0.5133	0.7776	0.9247	0.8154	0.7654	0.8723	0.543	0.5603	0.6044	0.4256	0.6406
TCGA_DU_A5TS_01	0.835	0.6764	0.5751	0.6777	0.7863	0.3108	0.7211	0.5921	0.6378	0.6493	0.7339	0.3573	0.4661	0.38	0.1136	0.7916	0.888	0.8083	0.8154	0.8523	0.5674	0.6411	0.5904	0.2225	0.9082
TCGA_DU_A5TT_01	0.0457	0.3397	0.0224	0.0652	0.1204	0.1669	0.2558	0.0339	0.0665	0.2432	0.1356	0.0328	0.1068	0.1148	0.1633	0.1142	0.3394	0.0321	0.0817	0.0751	0.1682	0.5549	0.3292	0.2761	0.3573
TCGA_DU_A5TU_01	0.6382	0.684	0.3375	0.1138	0.6884	0.4581	0.6889	0.4494	0.695	0.7187	0.8162	0.7478	0.0718	0.2847	0.5765	0.6154	0.7882	0.8764	0.5838	0.9186	0.6044	0.6747	0.746	0.3299	0.6783
TCGA_DU_A5TW_01	0.7514	0.7736	0.5422	0.7541	0.8891	0.4331	0.8378	0.3117	0.6168	0.7586	0.8298	0.3872	0.483	0.4829	0.5925	0.8518	0.9432	0.9221	0.8453	0.9323	0.4779	0.565	0.7725	0.3595	0.733
TCGA_DU_A5TY_01	0.0449	0.3174	0.0243	0.062	0.0639	0.0805	0.2674	0.0313	0.1469	0.1846	0.1394	0.0405	0.0697	0.0883	0.105	0.1759	0.2726	0.424	0.425	0.6965	0.0511	0.0789	0.2171	0.2736	0.5763
TCGA_DU_A6S2_01	0.2117	0.6307	0.1695	0.101	0.7161	0.5156	0.6921	0.5484	0.7294	0.5325	0.5987	0.0814	0.4416	0.2986	0.319	0.7198	0.8553	0.8584	0.7407	0.8793	0.5343	0.1913	0.6591	0.5296	0.8673
TCGA_DU_A6S3_01	0.71	0.5975	0.4479	0.5713	0.7734	0.5887	0.8507	0.3057	0.7572	0.5329	0.7026	0.3866	0.7881	0.5785	0.6047	0.7474	0.8753	0.8914	0.7523	0.8461	0.4902	0.5478	0.7074	0.7976	0.8566
TCGA_DU_A6S6_01	0.1562	0.6875	0.3683	0.0909	0.8621	0.6584	0.8571	0.6737	0.3449	0.6217	0.8065	0.6304	0.5091	0.1691	0.4501	0.521	0.6285	0.8541	0.5287	0.9202	0.6656	0.1562	0.8636	0.9201	0.4583
TCGA_DU_A6S7_01	0.8997	0.7397	0.6938	0.6111	0.8376	0.4535	0.8381	0.7095	0.3563	0.6687	0.8451	0.6359	0.3167	0.5292	0.4505	0.8177	0.9452	0.8785	0.5426	0.9329	0.425	0.5983	0.7605	0.4075	0.4559
TCGA_DU_A6S8_01	0.5957	0.7076	0.5916	0.2215	0.8551	0.671	0.8407	0.53	0.8359	0.7113	0.8242	0.4027	0.5611	0.4788	0.4422	0.8815	0.9154	0.9269	0.5146	0.938	0.6032	0.7064	0.721	0.8354	0.8687
TCGA_DU_A76K_01	0.0257	0.3048	0.0166	0.0917	0.153	0.1188	0.3203	0.0567	0.1936	0.1675	0.0723	0.02	0.1085	0.1151	0.2109	0.3522	0.2982	0.0369	0.0801	0.0844	0.0997	0.1626	0.4468	0.3454	0.476
TCGA_DU_A76L_01	0.0267	0.3374	0.019	0.0502	0.057	0.1078	0.2309	0.0268	0.0954	0.2039	0.1056	0.0228	0.1041	0.1007	0.1368	0.3977	0.3311	0.0409	0.0865	0.1086	0.1112	0.1156	0.4804	0.2604	0.3836
TCGA_DU_A76O_01	0.8133	0.7351	0.4883	0.6911	0.7572	0.6029	0.7073	0.5834	0.5403	0.7451	0.8371	0.6575	0.6275	0.3978	0.5774	0.8335	0.9788	0.8971	0.8346	0.8415	0.5729	0.6603	0.7677	0.7711	0.8878
TCGA_DU_A76R_01	0.8551	0.5199	0.5241	0.6754	0.7958	0.6001	0.742	0.3902	0.1429	0.6548	0.7899	0.4586	0.4163	0.3866	0.3897	0.7522	0.8743	0.9088	0.7871	0.8635	0.5157	0.4425	0.7612	0.7206	0.7342
TCGA_DU_A7T6_01	0.1467	0.587	0.0852	0.1105	0.4416	0.4146	0.7314	0.2192	0.3349	0.5214	0.6339	0.4671	0.0576	0.1769	0.238	0.5558	0.8402	0.9137	0.7755	0.8845	0.3938	0.5189	0.6987	0.5965	0.3686
TCGA_DU_A7T8_01	0.165	0.6524	0.4125	0.3448	0.8425	0.7162	0.7887	0.7002	0.5088	0.803	0.9022	0.8769	0.8704	0.7145	0.6008	0.8562	0.9678	0.934	0.887	0.9124	0.6328	0.7407	0.7926	0.5624	0.8973
TCGA_DU_A7TA_01	0.4288	0.5617	0.0605	0.4172	0.7725	0.5569	0.764	0.609	0.7983	0.7546	0.5697	0.6774	0.4192	0.5295	0.3679	0.7761	0.9032	0.9117	0.8737	0.8629	0.4568	0.5574	0.7145	0.5771	0.7703
TCGA_DU_A7TB_01	0.028	0.2811	0.0201	0.0776	0.1176	0.1427	0.35	0.0333	0.1318	0.1547	0.0612	0.0263	0.0795	0.0938	0.1905	0.116	0.3208	0.0548	0.0845	0.0819	0.1562	0.0775	0.128	0.2281	0.5525
TCGA_DU_A7TC_01	0.8533	0.6695	0.6411	0.6524	0.8046	0.6389	0.5913	0.6144	0.662	0.6653	0.7652	0.6521	0.5369	0.3704	0.5294	0.7411	0.9348	0.8917	0.8305	0.9192	0.603	0.6985	0.7876	0.6142	0.9247
TCGA_DU_A7TD_01	0.0368	0.2437	0.0187	0.0627	0.0482	0.0632	0.2076	0.0267	0.1347	0.174	0.1185	0.0244	0.0574	0.0777	0.1208	0.072	0.2795	0.0293	0.0723	0.159	0.2666	0.0799	0.4097	0.1934	0.2793
TCGA_DU_A7TG_01	0.2346	0.4909	0.2827	0.1511	0.5445	0.3648	0.6078	0.3276	0.4067	0.3861	0.3866	0.0709	0.3437	0.3233	0.3611	0.4083	0.6241	0.5164	0.456	0.5682	0.2846	0.3597	0.4493	0.6014	0.8083
TCGA_DU_A7TI_01	0.7672	0.6034	0.6198	0.5217	0.7323	0.5834	0.6996	0.5812	0.7532	0.6254	0.7212	0.1947	0.0905	0.1516	0.5223	0.7777	0.8846	0.8391	0.7681	0.8358	0.5538	0.6246	0.7753	0.5381	0.8165
TCGA_DU_A7TJ_01	0.0258	0.2839	0.0146	0.0539	0.0203	0.071	0.0828	0.0224	0.1584	0.1705	0.083	0.0206	0.0467	0.0551	0.0904	0.1113	0.2295	0.0235	0.0559	0.0904	0.2678	0.2618	0.5477	0.163	0.2606
TCGA_E1_5302_01	0.0716	0.7812	0.293	0.0558	0.1951	0.1249	0.5477	0.0241	0.1775	0.5294	0.4332	0.3464	0.3519	0.3927	0.4465	0.709	0.9252	0.855	0.8257	0.8967	0.4123	0.2822	0.6324	0.3719	0.8376
TCGA_E1_5303_01	0.7735	0.7006	0.5587	0.5508	0.7445	0.6162	0.7581	0.5491	0.3987	0.6553	0.7546	0.5826	0.3807	0.3478	0.4949	0.7174	0.8819	0.8329	0.7502	0.8809	0.6017	0.4297	0.7225	0.3077	0.6555
TCGA_E1_5304_01	0.2754	0.7851	0.1847	0.2212	0.9446	0.8567	0.8883	0.6724	0.9091	0.8315	0.9058	0.4623	0.4231	0.8398	0.7999	0.9223	0.843	0.977	0.9593	0.9511	0.1079	0.6475	0.6819	0.2799	0.7523
TCGA_E1_5305_01	0.6557	0.8102	0.6897	0.3909	0.8049	0.728	0.8827	0.6224	0.1201	0.7438	0.812	0.1451	0.1551	0.624	0.6413	0.8192	0.8342	0.9046	0.8881	0.9262	0.7327	0.4876	0.7771	0.3135	0.8541
TCGA_E1_5307_01	0.8849	0.7813	0.6802	0.7675	0.825	0.4319	0.8079	0.67	0.887	0.7655	0.9243	0.7898	0.1236	0.7234	0.627	0.8382	0.9704	0.8946	0.8546	0.9308	0.6604	0.65	0.8271	0.5557	0.6296
TCGA_E1_5311_01	0.3439	0.7374	0.3738	0.1331	0.7812	0.5889	0.7944	0.4916	0.8119	0.7046	0.7346	0.652	0.1242	0.4278	0.6487	0.8254	0.8461	0.885	0.8337	0.8979	0.6265	0.6306	0.7566	0.7025	0.9363
TCGA_E1_5318_01	0.8393	0.7663	0.761	0.6538	0.8739	0.7304	0.8632	0.7	0.8372	0.7966	0.8081	0.154	0.8793	0.7516	0.6667	0.8204	0.9022	0.9149	0.8381	0.925	0.6852	0.6364	0.8015	0.8674	0.9438
TCGA_E1_5319_01	0.4512	0.6916	0.3375	0.2577	0.7303	0.6113	0.8006	0.5267	0.6452	0.6298	0.646	0.3823	0.6529	0.4158	0.5626	0.5709	0.7513	0.8462	0.7475	0.9365	0.532	0.4015	0.7156	0.6832	0.871
TCGA_E1_5322_01	0.8634	0.7909	0.719	0.7469	0.8222	0.6815	0.7452	0.6052	0.1201	0.8456	0.4548	0.8275	0.0917	0.4372	0.4483	0.8423	0.8977	0.8216	0.7737	0.9005	0.4493	0.2447	0.7814	0.321	0.9159
TCGA_E1_A7YD_01	0.0272	0.3173	0.0155	0.068	0.0197	0.0357	0.1414	0.0142	0.1292	0.2058	0.1226	0.0251	0.0603	0.0945	0.0558	0.0986	0.2489	0.0398	0.0548	0.0919	0.0637	0.2152	0.4349	0.2053	0.2428
TCGA_E1_A7YE_01	0.0318	0.4782	0.0305	0.0726	0.3861	0.4817	0.3021	0.1408	0.2884	0.4644	0.7062	0.6213	0.0449	0.0699	0.1334	0.6882	0.7328	0.8406	0.7688	0.8927	0.5924	0.481	0.5765	0.2637	0.3113
TCGA_E1_A7YH_01	0.6477	0.6736	0.5486	0.6584	0.7153	0.587	0.7428	0.2822	0.6751	0.6534	0.5391	0.6239	0.6087	0.5124	0.5347	0.6969	0.6265	0.7155	0.5055	0.9331	0.3263	0.6016	0.6419	0.6353	0.8003
TCGA_E1_A7YI_01	0.4992	0.6676	0.1759	0.491	0.3415	0.3511	0.1722	0.1071	0.2053	0.3644	0.7872	0.7607	0.0508	0.0751	0.109	0.5369	0.3586	0.1235	0.1822	0.6938	0.5876	0.7166	0.8177	0.1549	0.7077
TCGA_E1_A7YJ_01	0.0226	0.3046	0.0144	0.0716	0.5029	0.3707	0.1795	0.2632	0.4422	0.2192	0.0968	0.0218	0.0665	0.0712	0.2011	0.0905	0.2721	0.0408	0.1082	0.158	0.1541	0.3537	0.4276	0.2363	0.3299
TCGA_E1_A7YK_01	0.63	0.4766	0.4113	0.4853	0.6082	0.3582	0.5622	0.4203	0.4329	0.5104	0.7037	0.3945	0.2291	0.3833	0.3898	0.428	0.8111	0.7267	0.6323	0.8382	0.4272	0.479	0.5685	0.2933	0.6538
TCGA_E1_A7YL_01	0.0289	0.373	0.024	0.0459	0.0226	0.0515	0.5488	0.0287	0.1035	0.3177	0.2024	0.03	0.0733	0.1091	0.1049	0.4248	0.4529	0.0358	0.0721	0.131	0.1622	0.0949	0.3088	0.308	0.439
TCGA_E1_A7YM_01	0.0286	0.3279	0.0132	0.0816	0.1309	0.1419	0.353	0.0407	0.1077	0.2196	0.1054	0.0199	0.1006	0.1349	0.33	0.1532	0.4228	0.0478	0.1134	0.1138	0.0898	0.1582	0.3787	0.3197	0.4279
TCGA_E1_A7YN_01	0.0262	0.4343	0.0249	0.065	0.0797	0.1161	0.2464	0.0195	0.0802	0.3581	0.3051	0.0845	0.1144	0.1803	0.104	0.2332	0.5851	0.3	0.2222	0.4719	0.0692	0.1731	0.1785	0.4122	0.6007
TCGA_E1_A7YO_01	0.0502	0.6423	0.1811	0.1159	0.755	0.6006	0.7654	0.3918	0.7908	0.6415	0.762	0.0938	0.1426	0.4661	0.6204	0.5325	0.5521	0.8933	0.8738	0.8979	0.5638	0.3174	0.7444	0.57	0.884
TCGA_E1_A7YQ_01	0.0296	0.4965	0.0183	0.0511	0.1902	0.1855	0.1266	0.0538	0.0807	0.2817	0.1818	0.0576	0.0555	0.0914	0.2839	0.1526	0.4835	0.6007	0.4903	0.6856	0.2561	0.5025	0.6165	0.2719	0.5253
TCGA_E1_A7YS_01	0.9152	0.7831	0.8805	0.7818	0.9195	0.7933	0.8412	0.8024	0.7856	0.8748	0.8447	0.9276	0.0577	0.1835	0.3946	0.9325	0.9683	0.9723	0.9481	0.9317	0.7392	0.8477	0.9078	0.8228	0.366
TCGA_E1_A7YU_01	0.7056	0.6174	0.5132	0.3833	0.7305	0.5455	0.7524	0.5362	0.774	0.5533	0.7965	0.0928	0.1384	0.4812	0.5442	0.7273	0.8504	0.8513	0.776	0.8804	0.3579	0.5641	0.5624	0.2816	0.6821
TCGA_E1_A7YV_01	0.8969	0.7274	0.6582	0.6704	0.828	0.6716	0.7649	0.1382	0.6882	0.5841	0.5741	0.3763	0.0662	0.4503	0.5158	0.8006	0.4112	0.6563	0.5026	0.7818	0.6601	0.7317	0.8029	0.3319	0.6666
TCGA_E1_A7YW_01	0.2091	0.7652	0.2117	0.3461	0.6733	0.4598	0.7418	0.3381	0.793	0.558	0.5578	0.598	0.1876	0.4178	0.5369	0.7362	0.971	0.9022	0.8675	0.9197	0.4052	0.4354	0.7247	0.3017	0.8122
TCGA_E1_A7YY_01	0.062	0.4177	0.2281	0.0682	0.4186	0.3383	0.6282	0.1989	0.391	0.2825	0.2722	0.1016	0.3023	0.3417	0.3112	0.4097	0.6376	0.5818	0.4678	0.8075	0.1411	0.1325	0.3905	0.6043	0.7314
TCGA_E1_A7Z2_01	0.0275	0.1695	0.0143	0.071	0.1108	0.1107	0.3822	0.0233	0.0854	0.0705	0.0343	0.0185	0.121	0.1007	0.2261	0.106	0.2081	0.0454	0.1346	0.6489	0.0823	0.0254	0.5157	0.2437	0.6488
TCGA_E1_A7Z3_01	0.6966	0.5557	0.4763	0.564	0.6652	0.5014	0.6424	0.5182	0.4255	0.5577	0.6796	0.3834	0.6044	0.4836	0.3636	0.6428	0.7804	0.7175	0.5725	0.8021	0.3772	0.4434	0.5915	0.7731	0.8379
TCGA_E1_A7Z4_01	0.3938	0.8089	0.7934	0.3053	0.534	0.1818	0.7046	0.1411	0.5663	0.8312	0.8644	0.9204	0.0731	0.2057	0.6852	0.8748	0.9389	0.9641	0.9071	0.8971	0.4184	0.1514	0.8263	0.713	0.796
TCGA_E1_A7Z6_01	0.4946	0.7456	0.5107	0.3267	0.7839	0.5525	0.4706	0.6122	0.497	0.7005	0.8294	0.8047	0.4364	0.5031	0.523	0.5592	0.9727	0.8581	0.5246	0.9042	0.6149	0.5573	0.7578	0.544	0.6173
TCGA_EZ_7264_01	0.7675	0.7539	0.7706	0.1554	0.9202	0.7953	0.9034	0.4342	0.8534	0.8246	0.8954	0.8847	0.4568	0.7131	0.6127	0.8518	0.9804	0.9798	0.9187	0.9585	0.7549	0.7276	0.7812	0.6626	0.4454
TCGA_F6_A8O3_01	0.4511	0.5011	0.3006	0.098	0.6922	0.7157	0.8508	0.4753	0.3216	0.7294	0.8797	0.6884	0.5142	0.3969	0.1886	0.847	0.919	0.897	0.9018	0.9245	0.6227	0.2004	0.7725	0.872	0.9101
TCGA_F6_A8O4_01	0.6861	0.5456	0.534	0.6435	0.7451	0.3955	0.7695	0.1184	0.7789	0.6191	0.7216	0.3486	0.0922	0.4169	0.1602	0.7935	0.8808	0.8614	0.7969	0.8924	0.388	0.4208	0.7008	0.8391	0.8966
TCGA_FG_5962_01	0.5865	0.8373	0.3974	0.2562	0.7884	0.7163	0.6245	0.5589	0.749	0.7874	0.8932	0.6035	0.3605	0.5393	0.5354	0.777	0.8494	0.9098	0.8748	0.9255	0.715	0.6462	0.8395	0.8754	0.8035
TCGA_FG_5963_01	0.0206	0.3251	0.0109	0.0414	0.0542	0.1029	0.4178	0.0214	0.0967	0.2548	0.3853	0.0261	0.1655	0.1606	0.1639	0.054	0.4069	0.0995	0.1268	0.6507	0.0623	0.0501	0.2381	0.486	0.6787
TCGA_FG_5963_02	0.0407	0.2277	0.0169	0.0438	0.0261	0.0255	0.0908	0.0181	0.0446	0.2889	0.3605	0.0298	0.2191	0.1591	0.0929	0.0642	0.2391	0.0445	0.091	0.3482	0.0879	0.0857	0.1866	0.3575	0.6171
TCGA_FG_5964_01	0.4431	0.5924	0.4156	0.3209	0.6641	0.5152	0.6547	0.4754	0.5569	0.4614	0.5159	0.2929	0.1204	0.3419	0.4182	0.7215	0.8154	0.787	0.6841	0.8458	0.427	0.45	0.6364	0.4393	0.8965
TCGA_FG_5965_01	0.5563	0.7418	0.5355	0.2439	0.6868	0.6441	0.6807	0.533	0.5646	0.7654	0.825	0.4618	0.5621	0.6264	0.5915	0.7243	0.882	0.8601	0.7752	0.9184	0.6139	0.4304	0.6656	0.3649	0.9019
TCGA_FG_5965_02	0.2696	0.4865	0.33775	0.2015	0.5853	0.44275	0.6414	0.3092	0.512	0.45935	0.56235	0.44185	0.13935	0.1492	0.29625	0.33125	0.3118	0.7179	0.60275	0.84025	0.3665	0.4342	0.57565	0.2851	0.62725
TCGA_FG_6688_01	0.0236	0.3799	0.0124	0.0654	0.056	0.1206	0.4526	0.0179	0.1229	0.2145	0.1023	0.0164	0.0901	0.1303	0.1511	0.0778	0.413	0.5874	0.4816	0.6974	0.2889	0.0537	0.3994	0.3295	0.4359
TCGA_FG_6689_01	0.3392	0.6515	0.3884	0.3921	0.7563	0.6269	0.8029	0.5597	0.7795	0.5509	0.8323	0.5115	0.6398	0.4862	0.5494	0.7203	0.9192	0.8409	0.7883	0.8688	0.4984	0.2531	0.6063	0.4931	0.7474
TCGA_FG_6690_01	0.8242	0.8061	0.7228	0.5916	0.8163	0.6538	0.5171	0.6656	0.2319	0.7521	0.8812	0.6402	0.6912	0.5607	0.6149	0.7793	0.9767	0.9283	0.8731	0.9289	0.6229	0.6998	0.7285	0.6601	0.6371
TCGA_FG_6691_01	0.4988	0.804	0.6039	0.3722	0.7113	0.3744	0.7636	0.3145	0.5511	0.6542	0.7253	0.1507	0.5863	0.3534	0.2214	0.6841	0.9454	0.8162	0.8004	0.9226	0.3841	0.425	0.7368	0.5578	0.9154
TCGA_FG_6692_01	0.0441	0.3183	0.0176	0.0756	0.0223	0.0558	0.253	0.013	0.1369	0.199	0.1231	0.0208	0.0614	0.0721	0.1202	0.1029	0.2331	0.0424	0.0755	0.0683	0.0884	0.2421	0.1988	0.2329	0.2711
TCGA_FG_7634_01	0.0241	0.4937	0.0372	0.0553	0.76	0.5914	0.7561	0.2453	0.7702	0.5838	0.5189	0.5357	0.0723	0.3547	0.3566	0.5825	0.7552	0.9007	0.8526	0.8838	0.4953	0.6073	0.7944	0.6101	0.8689
TCGA_FG_7636_01	0.5296	0.723	0.5748	0.4124	0.7995	0.6791	0.7394	0.6894	0.6936	0.7382	0.8133	0.7209	0.0664	0.5888	0.6321	0.8395	0.9703	0.8919	0.8609	0.9013	0.6522	0.712	0.7482	0.4898	0.7629
TCGA_FG_7637_01	0.1844	0.7275	0.5014	0.345	0.8511	0.2702	0.7895	0.6035	0.0967	0.6922	0.8656	0.7285	0.4912	0.4287	0.4216	0.7329	0.9268	0.9521	0.8936	0.9279	0.6206	0.6406	0.8554	0.285	0.8833
TCGA_FG_7638_01	0.054	0.6242	0.2664	0.1062	0.7195	0.5673	0.7751	0.6169	0.7595	0.568	0.6709	0.6368	0.5133	0.2152	0.4609	0.6311	0.9049	0.8974	0.505	0.9398	0.4989	0.6028	0.6505	0.8023	0.8186
TCGA_FG_7641_01	0.0321	0.4461	0.0434	0.0564	0.7525	0.5529	0.8125	0.4233	0.6953	0.5783	0.6845	0.3234	0.4874	0.388	0.3415	0.7864	0.823	0.8845	0.7709	0.8686	0.528	0.6036	0.7044	0.71	0.8152
TCGA_FG_7643_01	0.0237	0.3432	0.0209	0.0447	0.296	0.2398	0.6173	0.1248	0.2633	0.1788	0.1076	0.0288	0.1833	0.1845	0.2177	0.1249	0.4367	0.4956	0.4219	0.6899	0.2635	0.1705	0.3981	0.3732	0.5982
TCGA_FG_8181_01	0.0274	0.3598	0.0165	0.049	0.4178	0.2723	0.5342	0.1351	0.3471	0.2172	0.1762	0.0426	0.3954	0.2381	0.2548	0.2966	0.4839	0.1918	0.2047	0.2269	0.1617	0.1977	0.2804	0.6552	0.8434
TCGA_FG_8182_01	0.1485	0.633	0.2895	0.1223	0.7791	0.5684	0.7742	0.4681	0.6939	0.5985	0.7801	0.5906	0.2648	0.4553	0.4961	0.7183	0.9379	0.8786	0.782	0.8298	0.3783	0.503	0.6936	0.5095	0.871
TCGA_FG_8185_01	0.9497	0.8312	0.252	0.5973	0.8768	0.744	0.7957	0.6652	0.598	0.8292	0.8759	0.4932	0.5561	0.2334	0.6194	0.8082	0.9597	0.9438	0.8881	0.9133	0.7268	0.5386	0.8665	0.6722	0.9279
TCGA_FG_8186_01	0.0379	0.515	0.0184	0.0574	0.7866	0.6303	0.773	0.553	0.7619	0.6905	0.7669	0.7069	0.1082	0.2736	0.379	0.6434	0.9338	0.8794	0.8338	0.9352	0.6057	0.3236	0.7746	0.8486	0.9078
TCGA_FG_8187_01	0.3918	0.6224	0.2252	0.1727	0.7321	0.5413	0.8096	0.5361	0.6337	0.477	0.5624	0.285	0.1641	0.3267	0.4865	0.737	0.799	0.8198	0.7897	0.8792	0.5227	0.6281	0.7122	0.3485	0.6753
TCGA_FG_8188_01	0.8031	0.6761	0.611	0.5838	0.7905	0.6244	0.7979	0.5976	0.5964	0.6306	0.7247	0.6465	0.3257	0.5248	0.5131	0.743	0.8402	0.9058	0.7963	0.7647	0.3434	0.6214	0.7648	0.2425	0.7975
TCGA_FG_8189_01	0.0512	0.3984	0.0354	0.0786	0.4198	0.2791	0.6044	0.1749	0.3161	0.1856	0.2136	0.0371	0.5056	0.3275	0.3132	0.3276	0.5366	0.4409	0.3464	0.6797	0.1667	0.1108	0.3336	0.5896	0.795
TCGA_FG_8191_01	0.2984	0.661	0.5771	0.2948	0.7654	0.5814	0.6746	0.6158	0.5608	0.6453	0.4909	0.4839	0.2692	0.3444	0.4115	0.5707	0.9101	0.861	0.7796	0.8793	0.5055	0.4643	0.5343	0.4175	0.6118
TCGA_FG_A4MT_01	0.033	0.5152	0.4371	0.0694	0.9004	0.7417	0.8394	0.2955	0.1459	0.8828	0.8762	0.1037	0.0636	0.202	0.6176	0.5059	0.9596	0.967	0.5531	0.9502	0.7203	0.7774	0.8396	0.3552	0.7589
TCGA_FG_A4MT_02	0.0371	0.4842	0.4338	0.0538	0.6759	0.5586	0.6606	0.263	0.3245	0.5461	0.6296	0.1427	0.1211	0.1815	0.4617	0.5238	0.8206	0.8158	0.4873	0.8824	0.5843	0.6503	0.6331	0.2893	0.5625
TCGA_FG_A4MU_01	0.0402	0.2621	0.0186	0.0657	0.0574	0.1106	0.1487	0.0502	0.5157	0.1345	0.0873	0.0233	0.0437	0.0521	0.0765	0.4815	0.1495	0.0401	0.07	0.1252	0.3863	0.1379	0.5105	0.1501	0.2323
TCGA_FG_A4MW_01	0.0224	0.2424	0.0167	0.0429	0.0996	0.1164	0.3177	0.0377	0.1762	0.1148	0.0556	0.0198	0.1214	0.0873	0.162	0.0682	0.2029	0.0273	0.0888	0.1132	0.1584	0.4019	0.293	0.2445	0.427
TCGA_FG_A4MX_01	0.8771	0.6731	0.5933	0.1881	0.8876	0.7068	0.8021	0.4993	0.1747	0.7545	0.8695	0.8328	0.3923	0.5057	0.5293	0.8323	0.9645	0.9417	0.8959	0.9164	0.3926	0.1544	0.851	0.8277	0.8736
TCGA_FG_A4MY_01	0.7922	0.6356	0.4752	0.3678	0.7721	0.5986	0.7851	0.5189	0.6265	0.5773	0.7225	0.347	0.436	0.5217	0.4516	0.7443	0.8291	0.7969	0.7439	0.9246	0.4186	0.4219	0.6973	0.1688	0.6776
TCGA_FG_A60J_01	0.1212	0.7559	0.1287	0.1078	0.853	0.6984	0.7712	0.6382	0.8196	0.7762	0.8144	0.6085	0.0788	0.1765	0.6404	0.8076	0.9554	0.773	0.5645	0.9213	0.6318	0.5442	0.7657	0.8599	0.7803
TCGA_FG_A60K_01	0.5998	0.7663	0.4498	0.24	0.6645	0.3603	0.7879	0.3974	0.6745	0.6687	0.7734	0.2853	0.2918	0.2635	0.6602	0.8005	0.8858	0.9284	0.8575	0.939	0.6362	0.6315	0.783	0.4273	0.8737
TCGA_FG_A60L_01	0.1685	0.6788	0.0133	0.0465	0.7556	0.5518	0.6708	0.5937	0.679	0.5844	0.7229	0.3964	0.3764	0.4731	0.4639	0.6869	0.8243	0.8279	0.7654	0.8532	0.5175	0.3934	0.6945	0.5456	0.7788
TCGA_FG_A6IZ_01	0.9704	0.834	0.8213	0.8047	0.9215	0.7183	0.8512	0.8418	0.8449	0.8092	0.9108	0.5201	0.7486	0.7673	0.7691	0.9082	0.9818	0.9726	0.9403	0.9329	0.7415	0.8166	0.811	0.9112	0.8964
TCGA_FG_A6J1_01	0.5851	0.7627	0.6036	0.4513	0.8202	0.6377	0.7577	0.4306	0.4118	0.6484	0.774	0.7022	0.7589	0.4109	0.6497	0.8064	0.9301	0.9103	0.5498	0.9113	0.5872	0.4016	0.8278	0.8904	0.8993
TCGA_FG_A6J3_01	0.118	0.7106	0.2977	0.176	0.6203	0.3609	0.703	0.2773	0.4596	0.5472	0.601	0.8038	0.0757	0.3669	0.3959	0.4015	0.3114	0.8656	0.4611	0.8006	0.5555	0.712	0.755	0.1772	0.4624
TCGA_FG_A70Y_01	0.1203	0.545	0.3936	0.1258	0.6824	0.3791	0.7069	0.553	0.6961	0.5607	0.7111	0.5328	0.0906	0.3748	0.3293	0.7114	0.8498	0.8441	0.7174	0.8953	0.5301	0.4686	0.6486	0.3142	0.7978
TCGA_FG_A70Z_01	0.0362	0.26	0.0242	0.1137	0.1099	0.1264	0.4554	0.0388	0.1986	0.1782	0.0656	0.0596	0.0785	0.1313	0.1412	0.128	0.3241	0.1353	0.1979	0.5886	0.077	0.2531	0.3168	0.3047	0.4497
TCGA_FG_A710_01	0.6186	0.68	0.556	0.1297	0.7648	0.5756	0.7506	0.2772	0.085	0.653	0.8643	0.6673	0.1331	0.2551	0.5803	0.7943	0.9194	0.9179	0.8065	0.8935	0.5143	0.63	0.7084	0.4204	0.7394
TCGA_FG_A711_01	0.5458	0.5874	0.3201	0.2486	0.5583	0.2482	0.7487	0.06	0.6682	0.4975	0.6684	0.5548	0.1005	0.1632	0.5652	0.7108	0.9089	0.8725	0.8268	0.8691	0.3371	0.6071	0.5873	0.4382	0.7995
TCGA_FG_A713_01	0.3971	0.4947	0.353	0.3113	0.5856	0.37	0.6645	0.3957	0.2132	0.326	0.4693	0.1425	0.3832	0.3107	0.4067	0.5107	0.6784	0.7038	0.4735	0.723	0.3891	0.4557	0.4848	0.5743	0.7445
TCGA_FG_A87N_01	0.501	0.4133	0.1721	0.2704	0.7861	0.6185	0.4666	0.5236	0.6008	0.2701	0.2998	0.2784	0.1061	0.1453	0.224	0.785	0.2625	0.7376	0.6717	0.9109	0.5897	0.69	0.6308	0.1333	0.7591
TCGA_FG_A87Q_01	0.021	0.3181	0.012	0.0547	0.0943	0.1368	0.2621	0.0379	0.1958	0.2472	0.1701	0.0312	0.0785	0.0996	0.1558	0.0911	0.3114	0.4994	0.3316	0.5992	0.0792	0.1175	0.242	0.3287	0.4269
TCGA_FN_7833_01	0.0366	0.7646	0.4409	0.1122	0.8505	0.6921	0.8341	0.5485	0.9113	0.6744	0.4383	0.4178	0.0959	0.4758	0.6214	0.8061	0.964	0.9255	0.8763	0.9304	0.5114	0.7284	0.6333	0.2685	0.9017
TCGA_HT_7467_01	0.1072	0.5457	0.2018	0.2814	0.5313	0.3733	0.6556	0.3414	0.445	0.3649	0.4428	0.2224	0.5305	0.3154	0.292	0.4246	0.6485	0.6309	0.5554	0.6844	0.3173	0.4297	0.5487	0.3731	0.7226
TCGA_HT_7468_01	0.1137	0.8305	0.2406	0.0871	0.9305	0.7649	0.8885	0.8089	0.4924	0.7709	0.9547	0.8367	0.535	0.4405	0.4808	0.7465	0.9343	0.9747	0.9299	0.9363	0.6717	0.7177	0.8406	0.2673	0.8571
TCGA_HT_7469_01	0.0385	0.2152	0.0156	0.0499	0.0283	0.0491	0.2851	0.015	0.1415	0.169	0.1753	0.3007	0.0419	0.3225	0.078	0.1714	0.0742	0.0519	0.286	0.5427	0.4254	0.5068	0.5596	0.2257	0.672
TCGA_HT_7470_01	0.7081	0.5934	0.513	0.593	0.7497	0.5486	0.7783	0.5752	0.6753	0.5312	0.7097	0.5167	0.1066	0.3478	0.46	0.4736	0.8034	0.7803	0.669	0.8321	0.5106	0.4978	0.6012	0.3149	0.7261
TCGA_HT_7471_01	0.894	0.7806	0.7741	0.7967	0.8273	0.7489	0.8577	0.2246	0.7189	0.7844	0.8523	0.8403	0.0959	0.6451	0.716	0.5678	0.965	0.9491	0.914	0.9476	0.6656	0.4021	0.8575	0.4076	0.9021
TCGA_HT_7472_01	0.1316	0.7936	0.2483	0.101	0.7561	0.6321	0.7347	0.5793	0.7977	0.7393	0.8089	0.8144	0.4747	0.4153	0.4512	0.784	0.953	0.8983	0.8245	0.9292	0.652	0.5801	0.8146	0.3692	0.852
TCGA_HT_7473_01	0.0246	0.5971	0.0252	0.0609	0.7713	0.3828	0.71	0.615	0.4529	0.7042	0.6367	0.6792	0.0878	0.3694	0.5772	0.6663	0.95	0.8708	0.8146	0.9223	0.584	0.4643	0.6987	0.6341	0.4829
TCGA_HT_7474_01	0.4383	0.6824	0.4671	0.2097	0.7264	0.4097	0.7219	0.515	0.4868	0.5784	0.5402	0.506	0.3587	0.3352	0.4934	0.6754	0.8223	0.7477	0.7128	0.87	0.3967	0.4329	0.6878	0.6714	0.7706
TCGA_HT_7475_01	0.1271	0.6818	0.3937	0.0457	0.8375	0.6758	0.8389	0.2643	0.1617	0.1659	0.1193	0.3053	0.6572	0.489	0.67	0.8425	0.9157	0.9106	0.8494	0.9371	0.6344	0.555	0.8185	0.502	0.6783
TCGA_HT_7476_01	0.5861	0.678	0.5377	0.6104	0.7306	0.2845	0.7031	0.3906	0.1487	0.4723	0.5553	0.3389	0.3297	0.1974	0.369	0.6605	0.839	0.7419	0.7577	0.8249	0.365	0.5104	0.6463	0.4559	0.8644
TCGA_HT_7477_01	0.0331	0.575	0.0167	0.0551	0.9182	0.7287	0.8148	0.7321	0.6468	0.2196	0.4546	0.343	0.0547	0.3099	0.1664	0.4874	0.8298	0.8883	0.8763	0.851	0.6277	0.7339	0.6399	0.191	0.8699
TCGA_HT_7478_01	0.3073	0.6296	0.4842	0.3511	0.7059	0.5908	0.6224	0.5744	0.5269	0.6676	0.7412	0.5825	0.1268	0.2416	0.4314	0.6765	0.884	0.7997	0.7352	0.8675	0.5744	0.5698	0.7064	0.4885	0.7659
TCGA_HT_7479_01	0.4949	0.7014	0.4314	0.3327	0.7098	0.3022	0.68	0.4878	0.781	0.563	0.6401	0.4103	0.0827	0.1743	0.4669	0.6906	0.8779	0.806	0.7538	0.8663	0.5186	0.4371	0.6612	0.4155	0.7956
TCGA_HT_7480_01	0.6873	0.677	0.5954	0.3245	0.7929	0.4419	0.8597	0.5844	0.7739	0.6327	0.7843	0.6067	0.4494	0.4775	0.5419	0.8078	0.9414	0.9082	0.8786	0.9165	0.5063	0.487	0.7086	0.553	0.8437
TCGA_HT_7481_01	0.5235	0.6199	0.4567	0.3238	0.6574	0.4605	0.7479	0.4373	0.5712	0.4499	0.6348	0.107	0.615	0.4859	0.3839	0.5882	0.7509	0.7759	0.6945	0.7677	0.2869	0.0775	0.6193	0.41	0.76
TCGA_HT_7482_01	0.0995	0.6797	0.4435	0.3613	0.7499	0.4276	0.5632	0.4146	0.5687	0.6335	0.7929	0.2278	0.1132	0.3487	0.2897	0.7693	0.8884	0.9069	0.8134	0.9018	0.4461	0.5136	0.6664	0.3596	0.8719
TCGA_HT_7483_01	0.8246	0.7229	0.6158	0.7372	0.7891	0.6669	0.7607	0.6601	0.8423	0.677	0.7707	0.491	0.1307	0.2031	0.5855	0.8003	0.8976	0.9074	0.8336	0.9419	0.6388	0.702	0.8137	0.2814	0.6312
TCGA_HT_7485_01	0.2604	0.8235	0.2355	0.1716	0.8117	0.7063	0.818	0.4257	0.7524	0.7725	0.8428	0.7532	0.0509	0.2983	0.6443	0.6092	0.9363	0.9133	0.8234	0.935	0.4444	0.6585	0.7951	0.3455	0.8191
TCGA_HT_7601_01	0.4003	0.566	0.3405	0.2991	0.6362	0.3565	0.7062	0.2445	0.5849	0.5197	0.6374	0.4138	0.274	0.2611	0.4819	0.6557	0.8871	0.7798	0.6802	0.8582	0.3972	0.5026	0.6597	0.3204	0.7132
TCGA_HT_7602_01	0.1013	0.5573	0.1847	0.1191	0.6546	0.3961	0.7217	0.44	0.4961	0.4682	0.5198	0.2237	0.2213	0.2428	0.3639	0.5672	0.7969	0.7135	0.6567	0.7575	0.3631	0.4108	0.5381	0.4627	0.7179
TCGA_HT_7603_01	0.6298	0.5687	0.3516	0.3614	0.6961	0.5335	0.5122	0.3328	0.4704	0.4875	0.6104	0.3594	0.2256	0.4025	0.4718	0.6582	0.7937	0.7704	0.6648	0.8544	0.479	0.534	0.5484	0.4443	0.7912
TCGA_HT_7604_01	0.5678	0.7955	0.4806	0.3837	0.8891	0.7243	0.8292	0.7592	0.9167	0.7632	0.8371	0.8378	0.1621	0.6316	0.4194	0.6027	0.9669	0.9583	0.907	0.8949	0.3739	0.7959	0.5509	0.8563	0.7598
TCGA_HT_7605_01	0.1353	0.6135	0.3136	0.0515	0.6739	0.3945	0.7169	0.42	0.4567	0.4957	0.6075	0.2684	0.5962	0.3977	0.4107	0.5076	0.7894	0.8083	0.7678	0.819	0.386	0.3741	0.5737	0.6781	0.5839
TCGA_HT_7606_01	0.9405	0.7967	0.7633	0.8683	0.8846	0.7329	0.8617	0.6408	0.7798	0.6591	0.8359	0.7458	0.1135	0.4552	0.5435	0.7871	0.9379	0.9751	0.8978	0.9409	0.6374	0.5433	0.8688	0.1992	0.8499
TCGA_HT_7607_01	0.0873	0.5523	0.343	0.1648	0.544	0.3655	0.6046	0.3492	0.5152	0.3265	0.414	0.2133	0.283	0.324	0.4145	0.5441	0.5833	0.6814	0.5399	0.7962	0.3008	0.3906	0.4803	0.6083	0.6872
TCGA_HT_7608_01	0.3239	0.7178	0.3504	0.2624	0.7696	0.628	0.7573	0.5275	0.822	0.6708	0.6601	0.5559	0.1465	0.4286	0.3808	0.7826	0.8627	0.8711	0.8004	0.9109	0.576	0.6392	0.6392	0.4887	0.5691
TCGA_HT_7609_01	0.0249	0.3022	0.0145	0.0485	0.8277	0.7069	0.7651	0.658	0.8581	0.3671	0.2037	0.6697	0.4851	0.3976	0.5207	0.6491	0.8822	0.9159	0.8426	0.918	0.5595	0.4299	0.7516	0.2573	0.904
TCGA_HT_7610_01	0.4604	0.6257	0.3783	0.4464	0.7047	0.5504	0.7694	0.5501	0.5433	0.5497	0.5994	0.5797	0.5192	0.3421	0.5219	0.694	0.87	0.8254	0.756	0.8771	0.5273	0.5393	0.6353	0.5225	0.852
TCGA_HT_7611_01	0.8934	0.7668	0.7272	0.7452	0.8774	0.4506	0.8069	0.5801	0.6612	0.7617	0.7588	0.3658	0.4972	0.513	0.6908	0.839	0.9439	0.9392	0.8978	0.9073	0.6874	0.656	0.8142	0.3309	0.8704
TCGA_HT_7616_01	0.5259	0.6463	0.4739	0.3494	0.7423	0.5631	0.6504	0.5492	0.5334	0.6262	0.6954	0.5499	0.1079	0.2405	0.3996	0.2802	0.6427	0.8467	0.7668	0.8863	0.5003	0.4674	0.6324	0.7794	0.579
TCGA_HT_7620_01	0.2107	0.5248	0.4359	0.2814	0.5772	0.4039	0.7106	0.3452	0.4714	0.3886	0.4563	0.1555	0.1401	0.2013	0.3471	0.5812	0.6557	0.6986	0.5333	0.7348	0.3742	0.4274	0.5618	0.4621	0.7296
TCGA_HT_7676_01	0.6012	0.5716	0.534	0.3681	0.8716	0.6996	0.8097	0.3177	0.0892	0.738	0.8004	0.4985	0.4937	0.4547	0.6563	0.835	0.977	0.8979	0.8731	0.9254	0.5492	0.6485	0.7991	0.4994	0.8943
TCGA_HT_7677_01	0.8182	0.7344	0.6994	0.4825	0.801	0.6769	0.8002	0.6252	0.8601	0.7108	0.7813	0.7168	0.7782	0.4122	0.4057	0.6183	0.9033	0.9213	0.8923	0.908	0.2976	0.6618	0.7263	0.8115	0.8408
TCGA_HT_7680_01	0.0279	0.3629	0.0173	0.0573	0.0578	0.072	0.1481	0.0388	0.283	0.2737	0.2358	0.0375	0.0665	0.1199	0.1307	0.1123	0.6684	0.4128	0.5307	0.7245	0.1357	0.0894	0.2362	0.3116	0.3608
TCGA_HT_7681_01	0.2663	0.6636	0.2751	0.1463	0.747	0.5317	0.7734	0.5253	0.2347	0.6064	0.7889	0.1447	0.6369	0.3189	0.4183	0.6575	0.8783	0.9002	0.4629	0.7407	0.4971	0.2721	0.6413	0.7787	0.9053
TCGA_HT_7684_01	0.7076	0.6891	0.4913	0.5633	0.8113	0.5993	0.6895	0.558	0.7505	0.7102	0.8012	0.7483	0.0775	0.211	0.5218	0.7181	0.9127	0.8892	0.8308	0.8873	0.3767	0.334	0.675	0.5353	0.5876
TCGA_HT_7686_01	0.0293	0.3397	0.0175	0.0538	0.7014	0.2725	0.6455	0.3317	0.4617	0.5464	0.7001	0.5548	0.1055	0.194	0.3495	0.5855	0.5568	0.8348	0.7312	0.9026	0.6111	0.6626	0.6001	0.2943	0.7239
TCGA_HT_7687_01	0.7467	0.717	0.6416	0.4912	0.811	0.5882	0.7541	0.4275	0.336	0.6387	0.7185	0.5887	0.617	0.3859	0.4715	0.8209	0.895	0.8935	0.8646	0.9153	0.5074	0.6188	0.6547	0.7686	0.6569
TCGA_HT_7688_01	0.703	0.5881	0.548	0.6696	0.7413	0.5267	0.7922	0.4891	0.6519	0.4646	0.6207	0.4925	0.1339	0.2974	0.4342	0.6662	0.7939	0.8386	0.699	0.8117	0.496	0.5887	0.6978	0.5181	0.794
TCGA_HT_7689_01	0.7712	0.586	0.6018	0.4116	0.7177	0.5158	0.7559	0.4396	0.4473	0.5021	0.7153	0.5555	0.0962	0.2576	0.429	0.6885	0.8589	0.8656	0.7165	0.8694	0.5628	0.6497	0.6626	0.272	0.4776
TCGA_HT_7690_01	0.0428	0.7284	0.6382	0.2372	0.8119	0.4536	0.8025	0.3952	0.8101	0.4839	0.6228	0.6546	0.7184	0.5534	0.6347	0.7896	0.9564	0.9356	0.8319	0.8812	0.4028	0.4935	0.7407	0.6166	0.9077
TCGA_HT_7691_01	0.0327	0.3919	0.0197	0.0573	0.2179	0.1785	0.1832	0.1107	0.147	0.2694	0.2078	0.0816	0.0727	0.075	0.2711	0.18	0.6989	0.6351	0.4981	0.615	0.138	0.0999	0.3167	0.2951	0.3467
TCGA_HT_7692_01	0.8766	0.5066	0.6446	0.399	0.8351	0.6754	0.8358	0.4286	0.0616	0.6744	0.7939	0.0578	0.3174	0.5505	0.6049	0.8349	0.9233	0.9427	0.8749	0.9255	0.2244	0.6578	0.7662	0.8525	0.8448
TCGA_HT_7693_01	0.9537	0.7478	0.8241	0.8928	0.9175	0.7532	0.8096	0.658	0.9085	0.7772	0.8765	0.9157	0.0653	0.2699	0.7015	0.8536	0.9758	0.9432	0.5561	0.9321	0.3509	0.7565	0.7813	0.6384	0.9077
TCGA_HT_7694_01	0.5558	0.5916	0.4645	0.2828	0.5947	0.4701	0.7277	0.2432	0.5621	0.407	0.5693	0.1509	0.5556	0.4332	0.4381	0.4408	0.7112	0.6405	0.5996	0.7178	0.3842	0.4728	0.4954	0.534	0.769
TCGA_HT_7695_01	0.1611	0.5393	0.2581	0.0792	0.7462	0.5411	0.8062	0.163	0.1299	0.5397	0.718	0.1242	0.7135	0.4209	0.4529	0.5102	0.8357	0.6552	0.556	0.9172	0.3623	0.3614	0.7716	0.7494	0.8734
TCGA_HT_7854_01	0.0314	0.3937	0.0234	0.0631	0.0813	0.1091	0.2929	0.0701	0.1518	0.3136	0.1993	0.0533	0.1074	0.1324	0.3512	0.0951	0.4736	0.0396	0.0704	0.1381	0.2008	0.3271	0.3999	0.356	0.6998
TCGA_HT_7855_01	0.9366	0.7722	0.8088	0.8312	0.9376	0.7682	0.8309	0.6068	0.8861	0.8001	0.8771	0.8694	0.5325	0.5374	0.6836	0.8266	0.9758	0.9492	0.914	0.9085	0.7474	0.637	0.7965	0.5304	0.8968
TCGA_HT_7856_01	0.4784	0.5036	0.3186	0.2721	0.5919	0.3986	0.6005	0.3683	0.4748	0.3676	0.4295	0.17	0.4215	0.3205	0.3064	0.5335	0.6787	0.6076	0.5175	0.6785	0.3074	0.3917	0.5117	0.6086	0.7995
TCGA_HT_7857_01	0.0305	0.3463	0.0215	0.0469	0.0185	0.047	0.2726	0.0119	0.0667	0.2982	0.2149	0.0505	0.0656	0.1063	0.4144	0.1232	0.6084	0.394	0.3643	0.659	0.2216	0.1511	0.313	0.4218	0.5102
TCGA_HT_7858_01	0.5157	0.4923	0.4873	0.4498	0.701	0.5553	0.7005	0.2315	0.6868	0.6548	0.7269	0.6175	0.3311	0.2278	0.5347	0.7463	0.8598	0.8437	0.7322	0.8904	0.3878	0.6266	0.624	0.566	0.8493
TCGA_HT_7860_01	0.0277	0.3317	0.0161	0.0559	0.0897	0.1062	0.1257	0.0418	0.0847	0.216	0.143	0.036	0.0635	0.099	0.195	0.3882	0.2818	0.1115	0.1186	0.6804	0.0772	0.4921	0.1815	0.3124	0.3387
TCGA_HT_7873_01	0.6016	0.702	0.7645	0.7852	0.8325	0.1914	0.4918	0.6335	0.6233	0.6607	0.7949	0.5748	0.1234	0.4263	0.4029	0.8125	0.889	0.9235	0.8714	0.8893	0.639	0.4493	0.6548	0.2437	0.9111
TCGA_HT_7874_01	0.1764	0.5159	0.2011	0.2517	0.6137	0.4498	0.6788	0.4499	0.4209	0.3737	0.4293	0.1878	0.5343	0.3406	0.3904	0.5235	0.7035	0.678	0.4007	0.8365	0.3549	0.3976	0.5114	0.5932	0.6862
TCGA_HT_7875_01	0.0185	0.6377	0.2578	0.0446	0.8657	0.7613	0.841	0.7312	0.4965	0.78	0.8565	0.7945	0.2074	0.3048	0.7494	0.8484	0.9374	0.9627	0.9077	0.9276	0.2531	0.0799	0.8545	0.6634	0.7422
TCGA_HT_7877_01	0.5145	0.4714	0.3141	0.1959	0.6828	0.564	0.7288	0.4467	0.6842	0.5461	0.6251	0.2763	0.4323	0.2125	0.2701	0.7496	0.8029	0.8043	0.7263	0.889	0.5103	0.4533	0.6565	0.471	0.8896
TCGA_HT_7879_01	0.3957	0.6831	0.2855	0.3667	0.7918	0.6716	0.7571	0.5555	0.5787	0.7456	0.7968	0.5718	0.746	0.19	0.5923	0.7766	0.9516	0.8901	0.8345	0.8961	0.2461	0.5375	0.7854	0.692	0.8415
TCGA_HT_7880_01	0.3109	0.4815	0.3043	0.1823	0.6061	0.3452	0.6666	0.3942	0.4318	0.3931	0.4906	0.2092	0.3676	0.321	0.3486	0.5595	0.7262	0.6682	0.577	0.7457	0.3366	0.3562	0.5132	0.4492	0.7552
TCGA_HT_7881_01	0.0725	0.5393	0.0719	0.077	0.5105	0.4009	0.6835	0.1944	0.4892	0.3879	0.3867	0.2494	0.2321	0.3365	0.4092	0.6151	0.7284	0.6797	0.5389	0.7523	0.3418	0.2754	0.5215	0.3921	0.628
TCGA_HT_7882_01	0.026	0.4577	0.0283	0.0603	0.0257	0.0662	0.1642	0.0173	0.0752	0.3757	0.3656	0.1006	0.1377	0.1221	0.1871	0.1567	0.5968	0.0395	0.0639	0.103	0.1522	0.1496	0.1981	0.373	0.532
TCGA_HT_7884_01	0.1881	0.7432	0.4103	0.2882	0.8403	0.5501	0.7498	0.6382	0.726	0.6895	0.8127	0.7063	0.565	0.6099	0.6445	0.806	0.9496	0.8994	0.8124	0.9194	0.5924	0.6897	0.6371	0.6915	0.8797
TCGA_HT_7902_01	0.028	0.318	0.0165	0.0411	0.6108	0.4497	0.6653	0.4158	0.156	0.3939	0.5155	0.2027	0.1399	0.1899	0.1977	0.5553	0.4151	0.6914	0.5697	0.7339	0.225	0.4078	0.3924	0.2711	0.7092
TCGA_HT_8010_01	0.3255	0.6279	0.2381	0.2028	0.6587	0.4641	0.6541	0.4055	0.7057	0.4094	0.5067	0.17	0.3761	0.3797	0.3753	0.7056	0.8121	0.7648	0.4966	0.7383	0.4336	0.1141	0.5493	0.5898	0.6246
TCGA_HT_8011_01	0.0298	0.2645	0.0166	0.0598	0.0894	0.1395	0.2144	0.0533	0.2895	0.1281	0.0636	0.03	0.0595	0.1093	0.1127	0.1027	0.1751	0.0469	0.1045	0.1378	0.1241	0.0441	0.2235	0.2011	0.3255
TCGA_HT_8012_01	0.5038	0.7757	0.6202	0.5175	0.8812	0.7252	0.8843	0.5492	0.5995	0.7133	0.7819	0.7108	0.6236	0.7308	0.7104	0.8247	0.9478	0.953	0.8952	0.9323	0.5422	0.6846	0.6945	0.8811	0.9032
TCGA_HT_8013_01	0.1369	0.57	0.1541	0.0685	0.8483	0.4249	0.7647	0.3491	0.4777	0.6335	0.8112	0.7488	0.0877	0.2149	0.5837	0.8103	0.9366	0.878	0.7815	0.9354	0.4409	0.1806	0.7376	0.2399	0.5443
TCGA_HT_8015_01	0.0391	0.4198	0.0206	0.063	0.2048	0.1783	0.3209	0.0753	0.288	0.2964	0.2408	0.0613	0.1767	0.1957	0.1946	0.2867	0.5917	0.04	0.0689	0.1142	0.1061	0.1177	0.2151	0.4407	0.5718
TCGA_HT_8018_01	0.1962	0.5449	0.1828	0.1974	0.6271	0.4002	0.5367	0.3967	0.4473	0.3857	0.4466	0.2726	0.2718	0.3101	0.3985	0.6074	0.6983	0.6033	0.4171	0.7501	0.4171	0.4396	0.46	0.4509	0.7483
TCGA_HT_8019_01	0.0354	0.3409	0.0185	0.0518	0.4066	0.2802	0.6113	0.1721	0.3495	0.1354	0.1055	0.0298	0.3691	0.2575	0.3192	0.3074	0.3993	0.428	0.3247	0.6569	0.1698	0.2035	0.3004	0.6103	0.733
TCGA_HT_8104_01	0.0328	0.1779	0.0213	0.0433	0.059	0.0931	0.2422	0.0315	0.2011	0.0943	0.055	0.0163	0.0655	0.0885	0.2112	0.1482	0.2364	0.593	0.4848	0.6851	0.156	0.461	0.4197	0.2729	0.3512
TCGA_HT_8105_01	0.7792	0.6881	0.7222	0.5854	0.7998	0.6157	0.779	0.5123	0.2531	0.6754	0.7732	0.1042	0.4782	0.5051	0.3902	0.7873	0.9048	0.9292	0.8429	0.8994	0.5599	0.4993	0.7062	0.5113	0.6548
TCGA_HT_8106_01	0.4015	0.5802	0.3222	0.2958	0.5553	0.4241	0.4408	0.3238	0.2042	0.5048	0.5825	0.4218	0.2642	0.3234	0.31	0.5684	0.8833	0.5909	0.5028	0.5752	0.3739	0.4737	0.45	0.4324	0.7855
TCGA_HT_8107_01	0.0326	0.3341	0.0182	0.0463	0.4011	0.2599	0.6262	0.167	0.39	0.1713	0.1009	0.0204	0.3525	0.2256	0.2613	0.3878	0.4249	0.1141	0.1612	0.1772	0.1109	0.1184	0.222	0.4989	0.6304
TCGA_HT_8108_01	0.2566	0.511	0.567	0.309	0.5405	0.1458	0.7389	0.1547	0.1095	0.7413	0.6971	0.6343	0.0625	0.3887	0.6141	0.8236	0.6559	0.7786	0.4781	0.9356	0.6194	0.719	0.726	0.6288	0.9092
TCGA_HT_8109_01	0.7049	0.677	0.4786	0.5077	0.699	0.5189	0.6986	0.2199	0.2095	0.5152	0.6419	0.4032	0.1503	0.3844	0.3852	0.7417	0.665	0.8224	0.6857	0.8261	0.4799	0.457	0.6236	0.7107	0.7104
TCGA_HT_8110_01	0.0262	0.3846	0.018	0.0386	0.0491	0.0893	0.247	0.021	0.0562	0.3014	0.1758	0.0646	0.0836	0.122	0.1337	0.0968	0.5021	0.0325	0.0574	0.0722	0.0832	0.1236	0.3406	0.4046	0.5036
TCGA_HT_8111_01	0.5662	0.6922	0.4954	0.5327	0.6758	0.4862	0.5847	0.2525	0.5236	0.6575	0.741	0.3924	0.1964	0.1742	0.4339	0.6435	0.8667	0.7972	0.7201	0.8756	0.5205	0.4892	0.6393	0.3545	0.6643
TCGA_HT_8113_01	0.4184	0.4988	0.3324	0.2246	0.5774	0.4076	0.656	0.3699	0.449	0.4097	0.4863	0.2871	0.5405	0.3631	0.415	0.5207	0.6746	0.6745	0.5494	0.7686	0.3542	0.434	0.4482	0.5422	0.766
TCGA_HT_8114_01	0.5816	0.7742	0.5289	0.4856	0.792	0.6086	0.7048	0.6206	0.5374	0.7528	0.8055	0.7346	0.499	0.593	0.5159	0.798	0.9349	0.8999	0.7844	0.874	0.6207	0.6695	0.6172	0.3874	0.6912
TCGA_HT_8558_01	0.0237	0.3565	0.0193	0.0532	0.2417	0.2149	0.616	0.0868	0.3164	0.203	0.1466	0.0173	0.2476	0.2095	0.2092	0.2195	0.4078	0.3738	0.3071	0.6424	0.1163	0.1103	0.2443	0.3677	0.6543
TCGA_HT_8563_01	0.676	0.6193	0.5003	0.4773	0.5848	0.2128	0.5476	0.4663	0.3675	0.5103	0.6918	0.3658	0.1201	0.1773	0.3241	0.6725	0.8954	0.6657	0.531	0.674	0.3445	0.5103	0.613	0.4503	0.5273
TCGA_HT_8564_01	0.0296	0.2913	0.0186	0.0479	0.196	0.1721	0.2965	0.057	0.2631	0.2108	0.1446	0.0244	0.0916	0.1075	0.2828	0.1083	0.2521	0.0477	0.0747	0.0784	0.5266	0.4453	0.4506	0.2119	0.3389
TCGA_HT_A4DS_01	0.0242	0.3324	0.0142	0.0507	0.0171	0.0322	0.0967	0.0117	0.0427	0.2366	0.1237	0.0206	0.0454	0.0842	0.1639	0.0742	0.6519	0.489	0.4607	0.6653	0.2265	0.262	0.2465	0.2246	0.2924
TCGA_HT_A4DV_01	0.3957	0.5625	0.423	0.3414	0.1997	0.1762	0.7072	0.0633	0.2149	0.4197	0.446	0.1917	0.1491	0.3377	0.3812	0.44	0.5687	0.7581	0.5596	0.884	0.3623	0.1569	0.5205	0.4039	0.7454
TCGA_HT_A5R5_01	0.1322	0.6842	0.257	0.1005	0.4563	0.2531	0.6758	0.4042	0.4517	0.487	0.3517	0.458	0.4121	0.3283	0.4838	0.6915	0.8496	0.7654	0.5076	0.8778	0.4736	0.1429	0.6453	0.6192	0.7267
TCGA_HT_A5R7_01	0.2917	0.5812	0.1912	0.1219	0.5677	0.3929	0.6508	0.2395	0.2969	0.4288	0.5305	0.3176	0.2334	0.2804	0.3781	0.3669	0.5909	0.6836	0.4738	0.798	0.3465	0.5096	0.5866	0.3152	0.7458
TCGA_HT_A5R9_01	0.7869	0.6771	0.6419	0.5652	0.7307	0.6082	0.7179	0.1774	0.7527	0.5911	0.7004	0.1236	0.1386	0.449	0.3915	0.7598	0.8498	0.8754	0.7714	0.8955	0.5661	0.6673	0.6647	0.8409	0.9
TCGA_HT_A5RA_01	0.0427	0.2611	0.0181	0.054	0.0224	0.0361	0.0854	0.0222	0.0887	0.1467	0.0872	0.0292	0.0458	0.0482	0.0939	0.0935	0.1473	0.4766	0.4809	0.6284	0.0728	0.3525	0.3664	0.2108	0.2058
TCGA_HT_A5RB_01	0.6886	0.6787	0.6945	0.6863	0.8518	0.7276	0.8358	0.6751	0.8576	0.6643	0.7804	0.4465	0.6454	0.7069	0.6748	0.8106	0.8704	0.8957	0.8941	0.8973	0.6557	0.2723	0.7415	0.2682	0.9123
TCGA_HT_A5RC_01	0.038	0.2243	0.0215	0.0524	0.0825	0.1102	0.1999	0.0379	0.0878	0.1372	0.0811	0.069	0.0692	0.0876	0.1442	0.5479	0.3186	0.5798	0.4753	0.6726	0.1451	0.4592	0.3888	0.26	0.3063
TCGA_HT_A614_01	0.4655	0.6994	0.4851	0.1495	0.7001	0.4403	0.3009	0.4908	0.4778	0.5268	0.5046	0.5457	0.2746	0.4689	0.5657	0.7647	0.8756	0.8806	0.8164	0.9133	0.5873	0.496	0.6982	0.3832	0.8196
TCGA_HT_A615_01	0.0357	0.6889	0.026	0.053	0.6649	0.5526	0.6586	0.2309	0.1939	0.6099	0.7144	0.5932	0.153	0.3768	0.4458	0.4594	0.9139	0.6637	0.5702	0.8755	0.2423	0.3837	0.5727	0.8243	0.816
TCGA_HT_A616_01	0.5069	0.6683	0.2741	0.314	0.7943	0.6107	0.7643	0.5819	0.6738	0.5758	0.682	0.534	0.5707	0.455	0.3994	0.7464	0.8704	0.8429	0.767	0.9226	0.5516	0.4945	0.6933	0.3963	0.7276
TCGA_HT_A617_01	0.04	0.3992	0.018	0.0426	0.0418	0.0828	0.2317	0.0293	0.1022	0.3165	0.3358	0.0463	0.0999	0.1477	0.1456	0.2813	0.7981	0.044	0.0616	0.1076	0.0797	0.4093	0.3805	0.3268	0.7023
TCGA_HT_A618_01	0.086	0.453	0.2466	0.0903	0.5355	0.51	0.5709	0.2885	0.6258	0.2862	0.2145	0.351	0.1045	0.2465	0.4125	0.5762	0.6078	0.7704	0.6106	0.6449	0.4542	0.5803	0.5373	0.3204	0.6963
TCGA_HT_A619_01	0.5914	0.7444	0.4054	0.2694	0.9159	0.7638	0.8363	0.7685	0.8912	0.7641	0.892	0.8557	0.0551	0.7632	0.3806	0.9078	0.952	0.9645	0.8764	0.9353	0.6858	0.71	0.853	0.8782	0.9363
TCGA_HT_A61A_01	0.0384	0.468	0.0389	0.0727	0.3999	0.2593	0.6648	0.1272	0.278	0.3173	0.4305	0.0452	0.4257	0.3303	0.3182	0.4429	0.6382	0.6053	0.5237	0.6805	0.2365	0.148	0.3731	0.547	0.7188
TCGA_HT_A61B_01	0.0461	0.7693	0.1007	0.0644	0.6868	0.3835	0.7255	0.5074	0.265	0.6665	0.4978	0.6264	0.2325	0.6209	0.5056	0.8332	0.7169	0.918	0.8583	0.9113	0.4611	0.7393	0.6717	0.2093	0.8567
TCGA_HT_A61C_01	0.0325	0.231	0.017	0.0554	0.0539	0.0857	0.3223	0.0236	0.1507	0.1412	0.0769	0.019	0.0777	0.0803	0.0862	0.0851	0.219	0.0385	0.0699	0.0931	0.1638	0.1097	0.4735	0.2183	0.4906
TCGA_HT_A74H_01	0.0247	0.3896	0.0217	0.0552	0.1502	0.1391	0.3787	0.0218	0.1256	0.2172	0.1168	0.024	0.1399	0.1406	0.1943	0.2375	0.4493	0.0807	0.0882	0.1838	0.123	0.1096	0.4168	0.2878	0.4729
TCGA_HT_A74J_01	0.5405	0.7118	0.2442	0.1039	0.7911	0.6144	0.7376	0.61	0.7521	0.5597	0.7715	0.7359	0.0823	0.189	0.5852	0.7472	0.8786	0.8837	0.822	0.8861	0.2253	0.2524	0.6771	0.2303	0.624
TCGA_HT_A74K_01	0.5908	0.6506	0.5311	0.3895	0.7559	0.5236	0.7348	0.4949	0.1327	0.5863	0.6856	0.5243	0.6663	0.5272	0.4277	0.7422	0.7909	0.8058	0.6709	0.882	0.4776	0.4531	0.6527	0.5211	0.7727
TCGA_HT_A74L_01	0.0241	0.406	0.0195	0.0457	0.5816	0.613	0.7872	0.1382	0.7921	0.8362	0.9121	0.1524	0.5764	0.7192	0.6028	0.6333	0.7167	0.9687	0.895	0.912	0.6837	0.6575	0.6385	0.3109	0.8978
TCGA_HT_A74O_01	0.8292	0.745	0.6	0.6797	0.8051	0.4379	0.7933	0.6478	0.8111	0.7413	0.7553	0.8324	0.3712	0.3515	0.5662	0.7583	0.9569	0.8647	0.8413	0.7696	0.6308	0.6552	0.817	0.6462	0.5948
TCGA_HW_7486_01	0.3941	0.6055	0.4761	0.2885	0.6211	0.3489	0.7485	0.4222	0.6867	0.4485	0.64	0.2843	0.3042	0.3839	0.4614	0.5827	0.7845	0.7707	0.7147	0.8251	0.4169	0.4798	0.6	0.4852	0.667
TCGA_HW_7487_01	0.5837	0.6575	0.4162	0.3676	0.7518	0.5589	0.7696	0.4952	0.5807	0.5205	0.4484	0.3164	0.7677	0.421	0.557	0.7129	0.8001	0.8386	0.734	0.8979	0.4608	0.5647	0.7193	0.7501	0.8308
TCGA_HW_7489_01	0.6526	0.6487	0.4415	0.5223	0.7013	0.5649	0.7334	0.3633	0.3992	0.5384	0.6904	0.3433	0.4367	0.388	0.5286	0.6398	0.8281	0.7851	0.7529	0.8099	0.4958	0.5673	0.6389	0.405	0.7993
TCGA_HW_7490_01	0.0214	0.6674	0.2426	0.25	0.8268	0.667	0.8136	0.3538	0.7573	0.7308	0.8313	0.6893	0.0748	0.1407	0.4996	0.8051	0.9402	0.8796	0.866	0.9373	0.3346	0.6621	0.7254	0.7731	0.8859
TCGA_HW_7491_01	0.0212	0.7926	0.0131	0.0485	0.8723	0.721	0.8324	0.3312	0.9284	0.7954	0.8639	0.7192	0.8576	0.7683	0.7244	0.8488	0.9534	0.9579	0.9246	0.9542	0.6826	0.7154	0.8741	0.2903	0.9436
TCGA_HW_7493_01	0.2455	0.7527	0.2395	0.2089	0.7783	0.4557	0.7208	0.5452	0.6621	0.6582	0.7526	0.5818	0.6059	0.4638	0.5723	0.7342	0.8834	0.8522	0.7435	0.9254	0.5742	0.5829	0.7929	0.5901	0.7927
TCGA_HW_7495_01	0.3475	0.7274	0.485	0.2273	0.5096	0.2774	0.8328	0.1463	0.3471	0.5658	0.6719	0.428	0.4278	0.3989	0.395	0.623	0.8632	0.8947	0.7464	0.7502	0.5669	0.4097	0.7617	0.4104	0.7043
TCGA_HW_8319_01	0.0284	0.5605	0.1104	0.0543	0.8789	0.4693	0.8071	0.5779	0.8171	0.6902	0.7738	0.7903	0.0769	0.2033	0.3456	0.5968	0.7059	0.913	0.5765	0.9109	0.376	0.081	0.659	0.2833	0.596
TCGA_HW_8320_01	0.9311	0.7471	0.6223	0.7799	0.8849	0.7604	0.7848	0.671	0.6199	0.7535	0.8269	0.3951	0.1565	0.2249	0.4407	0.8627	0.9626	0.9272	0.9071	0.89	0.7104	0.4697	0.7788	0.2998	0.8697
TCGA_HW_8321_01	0.6427	0.7018	0.5329	0.1922	0.7975	0.6216	0.7524	0.3857	0.7303	0.6545	0.7638	0.3228	0.4428	0.4865	0.5429	0.5824	0.776	0.8531	0.8354	0.8321	0.612	0.0549	0.7062	0.6994	0.8476
TCGA_HW_8322_01	0.0341	0.7878	0.046	0.0619	0.8845	0.7546	0.8337	0.4009	0.7872	0.7795	0.7075	0.8134	0.0927	0.2235	0.5283	0.8221	0.8703	0.9568	0.9299	0.9232	0.7238	0.7577	0.8319	0.8703	0.9021
TCGA_HW_A5KJ_01	0.8212	0.6914	0.533	0.3619	0.779	0.6032	0.7382	0.6013	0.0935	0.6558	0.7301	0.5646	0.1602	0.588	0.4118	0.7721	0.7941	0.8822	0.8129	0.8854	0.5754	0.6594	0.7276	0.8187	0.8349
TCGA_HW_A5KK_01	0.0367	0.4203	0.0197	0.0369	0.1218	0.1209	0.3891	0.0429	0.1677	0.2517	0.191	0.0535	0.069	0.156	0.1256	0.2207	0.6186	0.0419	0.1279	0.1241	0.1696	0.2686	0.2811	0.3469	0.5537
TCGA_HW_A5KL_01	0.9137	0.7596	0.6882	0.601	0.8625	0.726	0.7789	0.6709	0.1332	0.7741	0.8817	0.1135	0.3639	0.3944	0.5149	0.8593	0.9787	0.9318	0.5342	0.9434	0.6746	0.5526	0.8665	0.4349	0.8806
TCGA_HW_A5KM_01	0.7997	0.8368	0.5139	0.5131	0.8069	0.6681	0.6121	0.6625	0.7952	0.8162	0.79	0.7932	0.3625	0.3786	0.5763	0.7765	0.97	0.8825	0.8116	0.8986	0.4417	0.5693	0.7443	0.5602	0.562
TCGA_IK_7675_01	0.019	0.4291	0.0661	0.0389	0.9414	0.4465	0.8407	0.23	0.0469	0.4382	0.4974	0.5119	0.1747	0.336	0.5893	0.8478	0.9177	0.966	0.9329	0.9402	0.4093	0.6965	0.8486	0.2111	0.9057
TCGA_IK_8125_01	0.8129	0.7235	0.5515	0.4221	0.7426	0.5879	0.763	0.595	0.7349	0.6493	0.7221	0.1689	0.5339	0.4627	0.5278	0.6717	0.8967	0.9061	0.8346	0.9172	0.5604	0.6108	0.7675	0.5044	0.85
TCGA_KT_A74X_01	0.6512	0.7008	0.6752	0.4802	0.8101	0.652	0.7963	0.6488	0.8101	0.6677	0.7237	0.2672	0.8299	0.6564	0.5533	0.7764	0.8934	0.9201	0.8606	0.919	0.5596	0.3502	0.767	0.806	0.8877
TCGA_KT_A7W1_01	0.0248	0.2532	0.0163	0.0604	0.0228	0.0488	0.096	0.0171	0.2418	0.1482	0.0513	0.0211	0.0476	0.063	0.1114	0.0797	0.1655	0.1377	0.0987	0.6899	0.0875	0.0429	0.3966	0.211	0.2772
TCGA_P5_A5ET_01	0.8486	0.5435	0.7301	0.4844	0.8453	0.6605	0.8563	0.6363	0.8568	0.601	0.5306	0.5512	0.7257	0.6498	0.4278	0.7956	0.8041	0.898	0.8753	0.903	0.5919	0.3453	0.7726	0.5582	0.885
TCGA_P5_A5EU_01	0.0284	0.2073	0.018	0.0345	0.7059	0.6328	0.6559	0.2313	0.2772	0.2608	0.145	0.1619	0.0839	0.1516	0.2691	0.6647	0.4007	0.9312	0.8875	0.8845	0.5027	0.6951	0.7326	0.2107	0.7045
TCGA_P5_A5EV_01	0.1947	0.738	0.1175	0.4475	0.8134	0.6387	0.728	0.6303	0.7801	0.7087	0.8173	0.2874	0.4222	0.5427	0.4978	0.8073	0.9264	0.8995	0.8217	0.8774	0.4672	0.6676	0.7704	0.2982	0.8781
TCGA_P5_A5EW_01	0.0704	0.6096	0.1607	0.1138	0.8254	0.7567	0.8249	0.7396	0.5398	0.7726	0.8684	0.5247	0.0919	0.2815	0.2596	0.829	0.9695	0.7865	0.5717	0.9426	0.6115	0.5154	0.7252	0.5564	0.8756
TCGA_P5_A5EX_01	0.0423	0.5055	0.0286	0.0627	0.6309	0.4888	0.5089	0.1887	0.4856	0.5926	0.651	0.2233	0.0998	0.2798	0.3106	0.5041	0.8707	0.7761	0.6427	0.8782	0.4633	0.4882	0.6179	0.4244	0.5531
TCGA_P5_A5EY_01	0.0353	0.379	0.0214	0.0443	0.3076	0.2305	0.2291	0.1002	0.3344	0.267	0.1913	0.0261	0.2133	0.1719	0.2434	0.3211	0.4831	0.0443	0.0817	0.1077	0.1037	0.0873	0.2403	0.4041	0.4458
TCGA_P5_A5EZ_01	0.6942	0.6833	0.555	0.6162	0.6887	0.5496	0.6681	0.518	0.5697	0.5936	0.7012	0.5488	0.1748	0.3126	0.4224	0.7141	0.817	0.7714	0.7444	0.8479	0.3968	0.6003	0.6849	0.2468	0.4705
TCGA_P5_A5F0_01	0.4485	0.6157	0.4628	0.3235	0.7587	0.4678	0.6297	0.4617	0.6756	0.4899	0.4057	0.0601	0.7302	0.5592	0.5865	0.5212	0.8102	0.8265	0.7454	0.8288	0.5306	0.5997	0.6191	0.52	0.8562
TCGA_P5_A5F1_01	0.1016	0.7113	0.2099	0.1732	0.8089	0.6523	0.5069	0.5502	0.848	0.677	0.5227	0.7002	0.2702	0.1905	0.4621	0.775	0.8769	0.8926	0.8748	0.8899	0.6165	0.5377	0.5976	0.3846	0.799
TCGA_P5_A5F2_01	0.7462	0.5804	0.6061	0.3684	0.6936	0.5539	0.6891	0.2382	0.4843	0.5567	0.6392	0.4818	0.4791	0.3961	0.2747	0.7219	0.8409	0.8544	0.548	0.909	0.5266	0.4187	0.5559	0.3414	0.5098
TCGA_P5_A5F4_01	0.7013	0.6733	0.5221	0.5751	0.7688	0.6148	0.8009	0.3292	0.7327	0.574	0.7001	0.526	0.3943	0.5241	0.6041	0.7227	0.8143	0.7746	0.4858	0.9098	0.3426	0.5513	0.5846	0.7683	0.8746
TCGA_P5_A5F6_01	0.0517	0.3514	0.0252	0.055	0.0212	0.0284	0.5303	0.0164	0.0435	0.2341	0.1592	0.0439	0.0613	0.0614	0.1452	0.0611	0.2175	0.055	0.0734	0.0787	0.0585	0.1138	0.1395	0.7732	0.1992
TCGA_P5_A72U_01	0.0232	0.4248	0.0225	0.0491	0.0498	0.1012	0.3026	0.0157	0.221	0.3173	0.2787	0.0566	0.1259	0.1267	0.1212	0.0989	0.6013	0.5774	0.3817	0.6612	0.4185	0.1259	0.3123	0.3426	0.4981
TCGA_P5_A72W_01	0.6244	0.7719	0.1766	0.252	0.9073	0.7033	0.82	0.5531	0.7577	0.8057	0.773	0.8594	0.5611	0.1588	0.6958	0.8645	0.9818	0.9537	0.8459	0.9274	0.6616	0.7102	0.8036	0.4648	0.8408
TCGA_P5_A72X_01	0.3655	0.6535	0.4786	0.1426	0.7519	0.5677	0.74	0.5486	0.3172	0.5594	0.5579	0.6251	0.1327	0.4099	0.5642	0.7421	0.8109	0.8389	0.7826	0.894	0.1997	0.5965	0.6437	0.3279	0.6547
TCGA_P5_A72Z_01	0.7173	0.7046	0.6721	0.3598	0.9567	0.794	0.8851	0.7885	0.8864	0.84	0.907	0.8657	0.2591	0.4573	0.3751	0.8481	0.9636	0.9758	0.9385	0.9349	0.7286	0.7896	0.8211	0.465	0.6025
TCGA_P5_A730_01	0.6113	0.5727	0.1572	0.224	0.8421	0.6621	0.8559	0.6976	0.4912	0.6929	0.8272	0.6657	0.2252	0.6877	0.4474	0.7929	0.8843	0.945	0.8745	0.839	0.6274	0.3249	0.7565	0.7219	0.9075
TCGA_P5_A731_01	0.1734	0.5212	0.0969	0.0706	0.7971	0.6305	0.7569	0.3358	0.7491	0.6541	0.4124	0.4706	0.0815	0.6206	0.2002	0.4713	0.907	0.9081	0.8144	0.7176	0.4545	0.6815	0.6133	0.3655	0.7679
TCGA_P5_A733_01	0.7968	0.696	0.5539	0.4045	0.7617	0.6346	0.7008	0.5928	0.3908	0.6418	0.7063	0.4899	0.6536	0.4432	0.6	0.7696	0.8141	0.8457	0.7864	0.9005	0.5852	0.605	0.6756	0.3255	0.6638
TCGA_P5_A735_01	0.2517	0.702	0.4889	0.412	0.8424	0.7123	0.5275	0.7167	0.8821	0.7058	0.6601	0.6271	0.566	0.7004	0.6784	0.8691	0.9769	0.9459	0.6307	0.946	0.6954	0.7157	0.7742	0.402	0.8818
TCGA_P5_A736_01	0.6162	0.6017	0.4958	0.2597	0.7008	0.534	0.5836	0.482	0.4904	0.6482	0.7036	0.1678	0.2094	0.251	0.4649	0.7252	0.9203	0.8364	0.7462	0.9316	0.5328	0.4299	0.5769	0.5527	0.5101
TCGA_P5_A737_01	0.3114	0.7641	0.4729	0.0761	0.8794	0.5016	0.8435	0.5252	0.1125	0.7616	0.8555	0.4017	0.0979	0.3903	0.6693	0.8201	0.9633	0.9649	0.913	0.9146	0.6296	0.7331	0.7942	0.9149	0.7617
TCGA_P5_A77W_01	0.7775	0.6919	0.5997	0.3809	0.7945	0.4549	0.8372	0.5996	0.4298	0.5904	0.7805	0.5839	0.606	0.6333	0.5105	0.7904	0.872	0.9133	0.8579	0.9412	0.5995	0.2497	0.6316	0.8214	0.8915
TCGA_P5_A77X_01	0.5129	0.7347	0.2286	0.0633	0.7851	0.6525	0.8021	0.4848	0.795	0.6273	0.733	0.1347	0.4559	0.2491	0.5507	0.7889	0.9114	0.6576	0.5541	0.9184	0.5897	0.0442	0.4946	0.4268	0.4251
TCGA_P5_A780_01	0.6679	0.6684	0.494	0.5314	0.7518	0.3894	0.7386	0.2612	0.6289	0.5619	0.739	0.5074	0.3674	0.5583	0.5294	0.5049	0.88	0.839	0.7731	0.919	0.5594	0.6052	0.7633	0.2884	0.5937
TCGA_P5_A781_01	0.1321	0.5097	0.1532	0.0778	0.6761	0.314	0.7939	0.2639	0.5877	0.4837	0.4713	0.3996	0.3298	0.2909	0.4822	0.7267	0.8746	0.8985	0.7859	0.904	0.4909	0.3964	0.6849	0.4488	0.7082
TCGA_QH_A65R_01	0.4102	0.6951	0.511	0.2297	0.77	0.6079	0.7701	0.2269	0.8009	0.6326	0.9013	0.4401	0.4491	0.4983	0.5848	0.8617	0.9099	0.9348	0.8303	0.9284	0.5427	0.6259	0.8077	0.8651	0.8708
TCGA_QH_A65S_01	0.3021	0.4226	0.4498	0.1466	0.7734	0.5979	0.7055	0.4702	0.6478	0.5887	0.6937	0.4923	0.0962	0.0997	0.2931	0.8061	0.767	0.8598	0.6322	0.9138	0.5352	0.4859	0.731	0.2557	0.7382
TCGA_QH_A65V_01	0.2453	0.6185	0.3701	0.1366	0.7313	0.5645	0.7681	0.5181	0.6919	0.5682	0.6544	0.4368	0.67	0.4529	0.3869	0.5409	0.8334	0.8721	0.7252	0.9074	0.5445	0.5991	0.6795	0.5785	0.6337
TCGA_QH_A65X_01	0.1261	0.7156	0.229	0.2183	0.8347	0.6623	0.8448	0.63	0.7703	0.6697	0.7499	0.2568	0.5309	0.6647	0.3523	0.612	0.8947	0.9298	0.8785	0.908	0.1433	0.6733	0.519	0.4405	0.9238
TCGA_QH_A65Z_01	0.9308	0.5703	0.8084	0.6535	0.8583	0.6986	0.8628	0.7103	0.8504	0.7592	0.8602	0.685	0.5244	0.4342	0.7171	0.8611	0.9107	0.9641	0.905	0.9203	0.6652	0.7339	0.8266	0.5039	0.6305
TCGA_QH_A6CS_01	0.0255	0.4143	0.0148	0.0354	0.099	0.1185	0.4153	0.0285	0.129	0.2017	0.1	0.0284	0.0904	0.1009	0.1495	0.0727	0.5972	0.0613	0.1493	0.0941	0.2508	0.077	0.1209	0.4106	0.493
TCGA_QH_A6CU_01	0.0209	0.6698	0.0173	0.0378	0.4931	0.2416	0.7154	0.1896	0.1628	0.5818	0.6603	0.0663	0.152	0.2733	0.3751	0.581	0.8638	0.9202	0.8134	0.9439	0.5308	0.287	0.483	0.349	0.5421
TCGA_QH_A6CV_01	0.0225	0.3676	0.0121	0.0486	0.031	0.0578	0.1511	0.0191	0.0739	0.1711	0.0862	0.0169	0.0684	0.067	0.1459	0.4807	0.2951	0.0363	0.0807	0.1088	0.4483	0.5357	0.4208	0.2196	0.3749
TCGA_QH_A6CW_01	0.8545	0.7724	0.6145	0.6138	0.8389	0.6806	0.7484	0.6415	0.6933	0.7706	0.8294	0.245	0.166	0.5463	0.5938	0.6841	0.9242	0.9491	0.8785	0.908	0.6753	0.7201	0.7773	0.3391	0.8707
TCGA_QH_A6CX_01	0.0221	0.3498	0.016	0.0436	0.1032	0.1245	0.3672	0.0255	0.1118	0.2061	0.1393	0.0206	0.0818	0.1124	0.1884	0.0719	0.5066	0.0625	0.0986	0.1896	0.1706	0.2355	0.3456	0.3265	0.4969
TCGA_QH_A6CY_01	0.1657	0.5922	0.3163	0.0775	0.7015	0.3342	0.6991	0.3203	0.679	0.4963	0.7859	0.3363	0.6702	0.5152	0.3772	0.6585	0.8262	0.7965	0.7707	0.8673	0.2951	0.1163	0.6575	0.3585	0.838
TCGA_QH_A6CZ_01	0.5064	0.7554	0.2751	0.1518	0.6008	0.4027	0.2332	0.5831	0.2128	0.5007	0.8637	0.0616	0.1619	0.2866	0.5607	0.8292	0.9563	0.9553	0.9186	0.9031	0.2743	0.0514	0.8673	0.2553	0.4892
TCGA_QH_A6X3_01	0.8784	0.7276	0.5244	0.33	0.873	0.7043	0.8342	0.7157	0.5445	0.7129	0.8352	0.7454	0.4331	0.4065	0.6104	0.826	0.9183	0.9362	0.8782	0.9207	0.6473	0.6804	0.8389	0.3344	0.9185
TCGA_QH_A6X4_01	0.0465	0.6793	0.5888	0.4151	0.7986	0.2625	0.8133	0.6596	0.6519	0.6007	0.7478	0.592	0.4969	0.4041	0.5633	0.8172	0.9422	0.9391	0.8816	0.9108	0.5526	0.6507	0.8519	0.6862	0.4089
TCGA_QH_A6X5_01	0.5651	0.5951	0.4073	0.2917	0.7189	0.5329	0.7665	0.519	0.5311	0.5131	0.8053	0.4377	0.2407	0.2047	0.4859	0.6956	0.8506	0.881	0.5579	0.8428	0.4031	0.5267	0.6026	0.584	0.7687
TCGA_QH_A6X8_01	0.7845	0.6844	0.592	0.5703	0.7737	0.6172	0.8684	0.6062	0.7296	0.577	0.6576	0.5321	0.1664	0.2616	0.6033	0.7928	0.8694	0.9128	0.8052	0.9166	0.483	0.602	0.6682	0.7965	0.8911
TCGA_QH_A6X9_01	0.7626	0.6656	0.5153	0.5634	0.8133	0.6115	0.7414	0.5378	0.8046	0.6116	0.7465	0.7053	0.3851	0.5906	0.4602	0.5342	0.9067	0.8947	0.8228	0.8801	0.6046	0.6607	0.7056	0.8199	0.7299
TCGA_QH_A6XA_01	0.6304	0.6811	0.496	0.2678	0.8095	0.6321	0.528	0.4751	0.3107	0.6298	0.7963	0.2288	0.5915	0.355	0.5625	0.7442	0.9404	0.7061	0.5595	0.721	0.5206	0.6044	0.7853	0.5225	0.7919
TCGA_QH_A6XC_01	0.0274	0.2342	0.0185	0.0536	0.1291	0.1443	0.2438	0.0422	0.3142	0.1039	0.0498	0.0165	0.0893	0.1066	0.1463	0.1587	0.259	0.062	0.0871	0.1348	0.0809	0.1783	0.3703	0.2608	0.4656
TCGA_QH_A86X_01	0.7051	0.6742	0.4424	0.2636	0.784	0.6313	0.811	0.648	0.1174	0.6402	0.7841	0.6171	0.4871	0.4492	0.6256	0.8222	0.9375	0.9048	0.8758	0.9012	0.5614	0.2023	0.7858	0.6209	0.6898
TCGA_QH_A870_01	0.0449	0.7568	0.1556	0.0576	0.8399	0.695	0.2525	0.6909	0.6092	0.7633	0.4836	0.5903	0.539	0.6355	0.5488	0.8644	0.9464	0.9134	0.8274	0.9309	0.6635	0.4707	0.6467	0.3223	0.9022
TCGA_R8_A6MK_01	0.0848	0.5387	0.1168	0.0484	0.7943	0.2306	0.8025	0.3968	0.2145	0.7016	0.4122	0.4828	0.4217	0.5896	0.584	0.7788	0.919	0.9013	0.86	0.9097	0.3221	0.3184	0.8558	0.3574	0.4899
TCGA_R8_A6ML_01	0.5597	0.7625	0.426	0.2859	0.8847	0.3154	0.8473	0.7208	0.7279	0.7617	0.8464	0.7116	0.5145	0.6116	0.6975	0.8382	0.9293	0.9573	0.8931	0.9192	0.6006	0.6294	0.7762	0.3328	0.8582
TCGA_R8_A6MO_01	0.7098	0.5687	0.5478	0.636	0.7003	0.5245	0.7483	0.5192	0.7368	0.5611	0.6415	0.3882	0.4957	0.3625	0.518	0.7051	0.8598	0.9022	0.7637	0.9148	0.3999	0.617	0.7136	0.359	0.7893
TCGA_R8_A6YH_01	0.6002	0.4862	0.3676	0.1086	0.93	0.7728	0.8604	0.6311	0.7172	0.8088	0.8487	0.91	0.5041	0.7251	0.4503	0.8948	0.9822	0.9681	0.9302	0.8837	0.7476	0.4637	0.8508	0.246	0.9248
TCGA_R8_A73M_01	0.1682	0.7903	0.361	0.2334	0.8964	0.7556	0.8911	0.6823	0.7818	0.7943	0.9351	0.2469	0.8816	0.5559	0.6886	0.3581	0.9641	0.9604	0.5705	0.9401	0.7042	0.7758	0.8889	0.6104	0.7621
TCGA_RY_A83X_01	0.409	0.6762	0.4903	0.2007	0.7428	0.6128	0.8311	0.5261	0.7212	0.5976	0.7885	0.5268	0.4348	0.5729	0.6115	0.7116	0.8718	0.8747	0.7723	0.9149	0.5802	0.4987	0.7047	0.755	0.9022
TCGA_RY_A83Y_01	0.6726	0.695	0.6276	0.2804	0.7627	0.2346	0.8191	0.5802	0.8168	0.6803	0.2536	0.722	0.8586	0.6811	0.6087	0.7825	0.9065	0.9199	0.8749	0.9209	0.6155	0.6538	0.7577	0.8439	0.4244
TCGA_RY_A83Z_01	0.8437	0.7558	0.7623	0.3959	0.8405	0.6851	0.7871	0.6168	0.055	0.5847	0.5708	0.4981	0.0996	0.218	0.242	0.7835	0.6145	0.9518	0.8707	0.9298	0.5291	0.5183	0.7324	0.1685	0.7115
TCGA_RY_A840_01	0.0643	0.7424	0.3015	0.0831	0.8174	0.7628	0.8327	0.5996	0.7884	0.7628	0.898	0.6754	0.7436	0.6513	0.6145	0.8305	0.9652	0.9559	0.8459	0.9383	0.6864	0.7004	0.8097	0.4105	0.3432
TCGA_RY_A843_01	0.6455	0.6124	0.4399	0.3729	0.6988	0.5995	0.6757	0.3127	0.481	0.6343	0.7481	0.536	0.5091	0.5516	0.4874	0.6218	0.8535	0.7337	0.7367	0.8384	0.5249	0.5365	0.6458	0.5522	0.8695
TCGA_RY_A845_01	0.7319	0.7041	0.3962	0.4078	0.7808	0.6418	0.7567	0.5712	0.5263	0.7661	0.7921	0.6338	0.8424	0.6914	0.4751	0.7862	0.949	0.8669	0.8154	0.9184	0.5351	0.6852	0.6926	0.8237	0.8401
TCGA_RY_A847_01	0.3668	0.6233	0.5188	0.4059	0.7295	0.5619	0.4702	0.5716	0.6842	0.6306	0.6876	0.251	0.4488	0.3371	0.4414	0.7924	0.8476	0.8425	0.8456	0.8238	0.4556	0.415	0.5696	0.5357	0.7784
TCGA_S9_A6TS_01	0.7995	0.6871	0.6547	0.6709	0.7982	0.4244	0.8122	0.6075	0.2319	0.6648	0.8374	0.8072	0.1147	0.3504	0.5037	0.7232	0.6738	0.9096	0.8256	0.8641	0.5687	0.4171	0.7254	0.7685	0.8011
TCGA_S9_A6TU_01	0.5765	0.7196	0.5903	0.3929	0.8286	0.6904	0.8088	0.642	0.739	0.6624	0.8727	0.71	0.4867	0.3962	0.6168	0.8253	0.9571	0.8726	0.8428	0.9221	0.6009	0.6707	0.7216	0.6373	0.9184
TCGA_S9_A6TV_01	0.8187	0.725	0.5561	0.523	0.3383	0.1297	0.131	0.2725	0.5026	0.8186	0.8001	0.7484	0.1014	0.5169	0.4627	0.8709	0.9694	0.9259	0.8789	0.9226	0.6224	0.7141	0.784	0.2341	0.463
TCGA_S9_A6TW_01	0.549	0.5982	0.4804	0.376	0.6972	0.4856	0.6401	0.4181	0.2118	0.5075	0.7338	0.0697	0.487	0.4958	0.4568	0.6556	0.7452	0.7813	0.681	0.8436	0.4107	0.4735	0.6562	0.4849	0.8417
TCGA_S9_A6TX_01	0.7389	0.6613	0.4186	0.4207	0.7597	0.598	0.3646	0.5076	0.7572	0.6207	0.7131	0.4918	0.1939	0.3964	0.5497	0.7673	0.8992	0.9469	0.8221	0.8832	0.5053	0.4519	0.7676	0.7115	0.8052
TCGA_S9_A6TY_01	0.4318	0.6989	0.2847	0.1101	0.8053	0.6494	0.8333	0.5412	0.2818	0.6024	0.7335	0.5369	0.6445	0.3658	0.6513	0.7908	0.8941	0.9179	0.839	0.9162	0.5397	0.6624	0.6657	0.8008	0.8357
TCGA_S9_A6TZ_01	0.5801	0.7735	0.5928	0.2064	0.8174	0.6841	0.7478	0.5803	0.8477	0.7484	0.8439	0.7487	0.299	0.4387	0.6342	0.8155	0.9267	0.9273	0.6184	0.9289	0.6204	0.6535	0.8083	0.6898	0.798
TCGA_S9_A6U0_01	0.0225	0.3652	0.0165	0.0505	0.1446	0.1312	0.2506	0.0626	0.0864	0.2402	0.2195	0.0248	0.0921	0.1208	0.0935	0.1145	0.3985	0.0396	0.0951	0.2199	0.0884	0.1044	0.1546	0.432	0.5865
TCGA_S9_A6U1_01	0.2101	0.3149	0.0809	0.2521	0.7465	0.4224	0.7928	0.5394	0.6996	0.6276	0.6746	0.1622	0.6624	0.439	0.5087	0.7309	0.9262	0.8759	0.8218	0.8564	0.321	0.1977	0.6623	0.6524	0.842
TCGA_S9_A6U2_01	0.2178	0.5965	0.2672	0.2117	0.646	0.5009	0.6653	0.5449	0.7573	0.5746	0.6748	0.4054	0.1948	0.5487	0.2596	0.676	0.7822	0.7828	0.5203	0.8643	0.4651	0.1011	0.7115	0.491	0.7255
TCGA_S9_A6U5_01	0.0684	0.7314	0.248	0.1145	0.6943	0.587	0.7523	0.3462	0.7139	0.708	0.8399	0.2888	0.1038	0.412	0.421	0.747	0.8841	0.8851	0.8727	0.9005	0.5205	0.5651	0.7819	0.7598	0.8107
TCGA_S9_A6U6_01	0.681	0.5988	0.558	0.3526	0.7537	0.5638	0.8024	0.5604	0.4408	0.6376	0.7767	0.3495	0.2131	0.5329	0.5519	0.7958	0.9244	0.9145	0.7913	0.8421	0.5388	0.6728	0.6573	0.4159	0.6681
TCGA_S9_A6U8_01	0.4448	0.6363	0.3083	0.4423	0.7525	0.5633	0.8146	0.5156	0.5543	0.6255	0.6936	0.5663	0.4508	0.4489	0.572	0.7318	0.9241	0.8678	0.8354	0.8747	0.3494	0.5165	0.6354	0.4497	0.7794
TCGA_S9_A6U9_01	0.7956	0.7305	0.3371	0.5786	0.825	0.4205	0.8032	0.5747	0.4768	0.6918	0.8157	0.7294	0.7821	0.5968	0.4158	0.7917	0.9083	0.9211	0.8346	0.8813	0.6232	0.4842	0.6844	0.8334	0.8962
TCGA_S9_A6UA_01	0.0417	0.4422	0.0271	0.0681	0.4561	0.35	0.1141	0.189	0.1668	0.3883	0.2844	0.0641	0.0729	0.1417	0.3319	0.3243	0.4765	0.0672	0.0868	0.1703	0.3382	0.1296	0.3284	0.414	0.5266
TCGA_S9_A6UB_01	0.7152	0.7357	0.728	0.7196	0.8237	0.6744	0.8648	0.5462	0.8564	0.7168	0.7697	0.7013	0.8602	0.6759	0.6882	0.8301	0.938	0.9577	0.8991	0.8928	0.6098	0.6883	0.8664	0.7076	0.8744
TCGA_S9_A6WD_01	0.4281	0.5257	0.1487	0.2859	0.7432	0.5461	0.8041	0.5983	0.8129	0.6006	0.7625	0.5316	0.3377	0.4271	0.5186	0.5703	0.8157	0.9195	0.864	0.9025	0.5011	0.1283	0.6288	0.4139	0.8371
TCGA_S9_A6WE_01	0.8138	0.7227	0.7042	0.5842	0.7993	0.6592	0.8896	0.6714	0.8608	0.6829	0.7967	0.8121	0.488	0.5955	0.6648	0.8389	0.9518	0.9502	0.8706	0.8228	0.5838	0.4682	0.7629	0.6858	0.6632
TCGA_S9_A6WG_01	0.3702	0.593	0.4379	0.4511	0.6364	0.4744	0.6116	0.4873	0.1968	0.5684	0.6683	0.3261	0.4172	0.3642	0.4187	0.6572	0.8259	0.7248	0.5919	0.69	0.399	0.5468	0.6787	0.4743	0.8564
TCGA_S9_A6WH_01	0.8714	0.6824	0.7922	0.2923	0.9143	0.7037	0.8594	0.7624	0.8443	0.8334	0.8562	0.7839	0.3353	0.4181	0.5725	0.9269	0.9611	0.7329	0.6254	0.9171	0.6009	0.3798	0.8254	0.9155	0.865
TCGA_S9_A6WI_01	0.2104	0.4414	0.3052	0.2479	0.4961	0.3149	0.7064	0.3588	0.317	0.2633	0.3188	0.0406	0.4702	0.3363	0.3246	0.4358	0.6648	0.6633	0.5135	0.607	0.2671	0.3237	0.5149	0.4519	0.7272
TCGA_S9_A6WL_01	0.726	0.4319	0.5935	0.6292	0.7088	0.5694	0.7458	0.6012	0.7821	0.5837	0.7726	0.5624	0.2816	0.5244	0.5612	0.7699	0.8419	0.9125	0.7886	0.7946	0.4783	0.5883	0.7636	0.9215	0.8674
TCGA_S9_A6WM_01	0.0344	0.2212	0.0185	0.0924	0.0251	0.0362	0.1965	0.0188	0.0578	0.1144	0.0758	0.0184	0.0449	0.0483	0.1739	0.0489	0.2355	0.1663	0.1542	0.6256	0.0872	0.2084	0.0747	0.1528	0.1902
TCGA_S9_A6WN_01	0.0388	0.657	0.053	0.1047	0.5483	0.4068	0.3372	0.3965	0.1445	0.6228	0.5176	0.3972	0.1561	0.2038	0.3595	0.3815	0.6437	0.7127	0.5491	0.8004	0.3324	0.4662	0.5391	0.5761	0.7458
TCGA_S9_A6WO_01	0.3891	0.742	0.3658	0.2352	0.8373	0.6471	0.55	0.4173	0.5188	0.7833	0.8181	0.6515	0.1335	0.4738	0.4742	0.8409	0.9531	0.9356	0.9143	0.9324	0.5865	0.6501	0.7325	0.3026	0.7945
TCGA_S9_A6WP_01	0.0243	0.382	0.0133	0.0663	0.7474	0.5795	0.7817	0.5764	0.1958	0.6718	0.7675	0.5875	0.5329	0.6292	0.5633	0.6594	0.9131	0.8717	0.8867	0.8909	0.514	0.5506	0.7715	0.7152	0.8762
TCGA_S9_A6WQ_01	0.3519	0.6769	0.3385	0.1653	0.689	0.5418	0.6594	0.5174	0.6914	0.6622	0.7121	0.5634	0.5899	0.4715	0.5269	0.7308	0.8177	0.7195	0.4735	0.9075	0.5237	0.4392	0.6529	0.4254	0.8234
TCGA_S9_A7IQ_01	0.1171	0.5262	0.2701	0.097	0.5894	0.4351	0.5438	0.1835	0.3404	0.3988	0.5508	0.2519	0.3168	0.3749	0.3427	0.6012	0.7432	0.7726	0.675	0.8562	0.2666	0.3088	0.6418	0.5096	0.7341
TCGA_S9_A7IS_01	0.7738	0.6226	0.5141	0.3257	0.7234	0.573	0.749	0.2214	0.5548	0.3086	0.4809	0.1621	0.0625	0.1022	0.3009	0.729	0.7804	0.715	0.5861	0.8724	0.4349	0.6955	0.751	0.1216	0.7436
TCGA_S9_A7IX_01	0.0247	0.3189	0.015	0.0697	0.1293	0.1399	0.2203	0.0244	0.1127	0.2086	0.1232	0.0283	0.1017	0.0948	0.1749	0.1121	0.4273	0.0292	0.0592	0.0958	0.3084	0.0985	0.4832	0.3351	0.418
TCGA_S9_A7IY_01	0.0352	0.6685	0.05	0.1015	0.7127	0.5769	0.7091	0.2294	0.3921	0.6642	0.7236	0.4994	0.3589	0.3654	0.5868	0.7154	0.8464	0.8265	0.7896	0.8843	0.4913	0.5179	0.5852	0.804	0.7177
TCGA_S9_A7IZ_01	0.7953	0.663	0.4809	0.5504	0.7691	0.607	0.7312	0.4729	0.4579	0.631	0.7367	0.6456	0.0687	0.343	0.3227	0.5765	0.8477	0.8075	0.6886	0.8884	0.4972	0.6463	0.6551	0.3128	0.6285
TCGA_S9_A7J0_01	0.955	0.7759	0.8156	0.8208	0.9103	0.5512	0.8674	0.7636	0.8052	0.8138	0.8618	0.8901	0.9061	0.4667	0.6096	0.908	0.9839	0.9781	0.9125	0.9334	0.5093	0.2293	0.5269	0.5337	0.9283
TCGA_S9_A7J1_01	0.2433	0.6354	0.4685	0.1232	0.7417	0.5727	0.7442	0.5096	0.1896	0.5948	0.7062	0.5309	0.3734	0.4653	0.5529	0.7209	0.8655	0.8578	0.747	0.8644	0.5289	0.2596	0.69	0.3423	0.6781
TCGA_S9_A7J2_01	0.0233	0.3484	0.0161	0.0568	0.8801	0.7316	0.8736	0.7674	0.886	0.7769	0.6061	0.82	0.2894	0.4061	0.5063	0.9017	0.968	0.9724	0.939	0.9136	0.3461	0.667	0.8263	0.7381	0.9192
TCGA_S9_A7J3_01	0.7356	0.681	0.5739	0.4602	0.7034	0.5943	0.749	0.5383	0.6526	0.6091	0.7123	0.427	0.5932	0.5754	0.5907	0.7358	0.8646	0.8692	0.7684	0.9363	0.5368	0.5319	0.6499	0.6989	0.818
TCGA_S9_A7QW_01	0.1636	0.757	0.0285	0.0807	0.893	0.2132	0.909	0.773	0.6489	0.4978	0.603	0.8333	0.9225	0.4615	0.6892	0.5312	0.9816	0.7159	0.4425	0.9318	0.4266	0.6337	0.7267	0.5127	0.7562
TCGA_S9_A7QX_01	0.2926	0.762	0.5971	0.5932	0.7772	0.7278	0.783	0.3718	0.8291	0.7704	0.8458	0.6989	0.0734	0.4768	0.5678	0.8257	0.966	0.9269	0.5102	0.96	0.6448	0.7107	0.7943	0.2542	0.8667
TCGA_S9_A7QY_01	0.2573	0.6468	0.3746	0.2118	0.6882	0.5435	0.7541	0.4882	0.4735	0.5558	0.6123	0.2247	0.1471	0.4203	0.359	0.6799	0.8202	0.866	0.7602	0.9256	0.3598	0.5037	0.6192	0.667	0.8154
TCGA_S9_A7QZ_01	0.0462	0.6423	0.1052	0.0801	0.778	0.5767	0.8285	0.5468	0.7612	0.6574	0.6834	0.5572	0.6246	0.5348	0.6029	0.769	0.8795	0.9067	0.8369	0.9057	0.5046	0.6591	0.7917	0.7882	0.759
TCGA_S9_A7R1_01	0.2061	0.5712	0.0456	0.0997	0.7715	0.2777	0.8032	0.5135	0.243	0.6817	0.7427	0.2364	0.1148	0.2905	0.4843	0.771	0.88	0.9014	0.8721	0.9322	0.6369	0.2227	0.6558	0.44	0.8438
TCGA_S9_A7R2_01	0.0293	0.3952	0.0149	0.0504	0.0361	0.0834	0.3738	0.0183	0.4558	0.2736	0.2389	0.0247	0.0751	0.1407	0.1344	0.1339	0.5118	0.032	0.0625	0.1111	0.1147	0.1099	0.3963	0.3237	0.4621
TCGA_S9_A7R3_01	0.2096	0.7673	0.3363	0.4688	0.8155	0.7025	0.7928	0.5654	0.1605	0.7878	0.5754	0.8623	0.6105	0.148	0.5041	0.8483	0.9523	0.9298	0.8512	0.9152	0.6239	0.7485	0.8012	0.239	0.8185
TCGA_S9_A7R4_01	0.0468	0.4985	0.1779	0.0764	0.6011	0.4667	0.7888	0.4559	0.5114	0.7665	0.8207	0.2826	0.5472	0.4351	0.6885	0.8055	0.9195	0.9176	0.8318	0.9247	0.7072	0.7387	0.7628	0.4633	0.897
TCGA_S9_A7R7_01	0.041	0.6188	0.0892	0.0734	0.6668	0.5819	0.6101	0.42	0.5172	0.6309	0.7521	0.4281	0.1777	0.3505	0.3815	0.6638	0.8132	0.7288	0.673	0.8367	0.5067	0.4558	0.7039	0.3804	0.6158
TCGA_S9_A7R8_01	0.3176	0.7521	0.4644	0.3828	0.816	0.6708	0.8623	0.6179	0.8031	0.7872	0.8841	0.7351	0.0876	0.3976	0.6332	0.8641	0.9469	0.9684	0.8941	0.9155	0.6513	0.4604	0.8426	0.3061	0.8503
TCGA_S9_A89V_01	0.028	0.2592	0.0156	0.0505	0.0744	0.1323	0.3557	0.0177	0.0812	0.1437	0.1162	0.0239	0.1416	0.234	0.2055	0.0429	0.2627	0.0363	0.0587	0.1236	0.0438	0.0232	0.3025	0.1745	0.1737
TCGA_S9_A89Z_01	0.4823	0.6966	0.3487	0.3763	0.7213	0.65	0.7048	0.533	0.7955	0.57	0.7706	0.7438	0.1005	0.3418	0.4907	0.7881	0.8866	0.8403	0.8283	0.8993	0.5761	0.5775	0.6118	0.2947	0.6394
TCGA_TM_A7C3_01	0.0236	0.2663	0.0135	0.0433	0.0229	0.063	0.3168	0.0112	0.7232	0.1075	0.0894	0.0318	0.0596	0.0561	0.1708	0.1563	0.1628	0.7107	0.5538	0.6188	0.0728	0.3086	0.3443	0.1777	0.3294
TCGA_TM_A7C4_01	0.2813	0.6002	0.2648	0.1913	0.593	0.3893	0.4599	0.2958	0.6533	0.4998	0.7207	0.4852	0.395	0.5292	0.5585	0.4539	0.8637	0.8263	0.715	0.9088	0.5104	0.5418	0.6742	0.5922	0.8264
TCGA_TM_A7C5_01	0.474	0.7401	0.6395	0.3429	0.8505	0.7305	0.8248	0.4869	0.3465	0.7066	0.5861	0.7371	0.4902	0.5068	0.4764	0.6646	0.9067	0.92	0.9351	0.9043	0.6542	0.6489	0.7331	0.7302	0.9158
TCGA_TM_A7CA_01	0.7323	0.6791	0.2577	0.3836	0.7858	0.6181	0.7588	0.6745	0.8369	0.6974	0.7672	0.6767	0.8463	0.6623	0.6241	0.5228	0.9461	0.9236	0.8583	0.8288	0.5794	0.6508	0.5822	0.5438	0.8043
TCGA_TM_A7CF_01	0.73	0.6828	0.5929	0.4105	0.8115	0.6656	0.8103	0.4516	0.6991	0.6336	0.7164	0.5775	0.1674	0.4325	0.4354	0.7569	0.8725	0.8905	0.8171	0.9245	0.5976	0.4261	0.6678	0.5335	0.848
TCGA_TM_A7CF_02	0.5327	0.5562	0.3856	0.2498	0.6928	0.5036	0.7987	0.2045	0.485	0.4775	0.6183	0.3026	0.0713	0.3664	0.3048	0.6181	0.7404	0.8062	0.6575	0.8761	0.4679	0.3016	0.5971	0.5482	0.8487
TCGA_TM_A84B_01	0.0243	0.2187	0.0136	0.0512	0.0286	0.0729	0.427	0.0165	0.3166	0.1138	0.0592	0.019	0.0523	0.0994	0.0819	0.0275	0.0233	0.0281	0.0751	0.1153	0.0766	0.1787	0.198	0.1371	0.3816
TCGA_TM_A84C_01	0.025	0.3272	0.0154	0.0608	0.0282	0.0637	0.1285	0.0138	0.1424	0.108	0.0851	0.0516	0.053	0.0747	0.3439	0.0315	0.1888	0.0306	0.0568	0.0813	0.3734	0.4085	0.4533	0.1969	0.1763
TCGA_TM_A84F_01	0.0326	0.5326	0.0211	0.0428	0.6415	0.4803	0.5911	0.4753	0.5432	0.4212	0.4227	0.4892	0.0889	0.3485	0.3942	0.396	0.9042	0.6959	0.6184	0.7001	0.3528	0.4995	0.5608	0.596	0.5486
TCGA_TM_A84G_01	0.479	0.7146	0.6814	0.0754	0.8736	0.7318	0.8579	0.7288	0.1116	0.7558	0.8247	0.7829	0.861	0.6598	0.3616	0.4724	0.9752	0.8184	0.5581	0.9365	0.6518	0.7262	0.8274	0.2596	0.905
TCGA_TM_A84H_01	0.877	0.7248	0.5579	0.5986	0.7668	0.6189	0.6902	0.5027	0.8323	0.7935	0.8403	0.8764	0.5176	0.61	0.6134	0.8545	0.9787	0.8847	0.7752	0.9012	0.6284	0.6961	0.7267	0.8058	0.8041
TCGA_TM_A84I_01	0.264	0.517	0.5094	0.2473	0.9227	0.7248	0.3878	0.5899	0.4944	0.4787	0.7625	0.9152	0.0566	0.1108	0.0773	0.4364	0.3035	0.9645	0.8331	0.9157	0.4378	0.7592	0.6468	0.1242	0.6659
TCGA_TM_A84J_01	0.0268	0.2261	0.0154	0.0739	0.2913	0.48	0.3537	0.1729	0.122	0.3493	0.2687	0.5047	0.0431	0.0567	0.1967	0.0195	0.0346	0.0641	0.0845	0.1742	0.4593	0.4194	0.5347	0.1098	0.3647
TCGA_TM_A84L_01	0.6138	0.6502	0.5406	0.3756	0.7255	0.5486	0.6607	0.5713	0.2762	0.6501	0.6866	0.4115	0.3263	0.4122	0.3634	0.628	0.8521	0.7206	0.6279	0.8229	0.4924	0.3913	0.6339	0.3805	0.855
TCGA_TM_A84M_01	0.0462	0.6179	0.054	0.099	0.939	0.7673	0.8851	0.053	0.8746	0.8521	0.8516	0.2495	0.1584	0.3118	0.5466	0.8601	0.969	0.9746	0.9139	0.9165	0.7423	0.7715	0.8253	0.9046	0.5035
TCGA_TM_A84O_01	0.1971	0.6467	0.2288	0.1828	0.6971	0.5825	0.6677	0.3411	0.7023	0.6085	0.7071	0.472	0.079	0.1962	0.1552	0.6984	0.8279	0.8218	0.7274	0.9329	0.4981	0.5085	0.6798	0.7735	0.5955
TCGA_TM_A84Q_01	0.6572	0.6478	0.6278	0.3011	0.7263	0.5664	0.7664	0.5742	0.7762	0.6928	0.6535	0.556	0.0695	0.3815	0.5394	0.755	0.9477	0.7943	0.7687	0.8789	0.3849	0.6744	0.705	0.562	0.8056
TCGA_TM_A84R_01	0.0987	0.4504	0.2919	0.0897	0.5185	0.3445	0.4949	0.2875	0.357	0.3041	0.4209	0.0864	0.2324	0.3072	0.3723	0.4163	0.5705	0.5224	0.4268	0.5045	0.2867	0.3446	0.4943	0.7022	0.7094
TCGA_TM_A84S_01	0.0728	0.6221	0.0916	0.0708	0.6952	0.4479	0.732	0.3145	0.2568	0.6568	0.6983	0.1582	0.1663	0.3545	0.391	0.6454	0.9061	0.8309	0.8285	0.8747	0.5137	0.3998	0.7027	0.7202	0.6447
TCGA_TM_A84T_01	0.8154	0.732	0.4255	0.2997	0.7201	0.4505	0.7758	0.6319	0.4905	0.7807	0.6805	0.7876	0.4699	0.3921	0.4119	0.8046	0.9468	0.9239	0.8632	0.9235	0.5431	0.1628	0.7095	0.2268	0.8557
TCGA_TQ_A7RF_01	0.5174	0.7441	0.1839	0.0704	0.813	0.6762	0.841	0.6132	0.8715	0.5694	0.888	0.8133	0.5263	0.7629	0.6531	0.8023	0.9731	0.9308	0.8942	0.9124	0.6709	0.3278	0.8263	0.1772	0.9167
TCGA_TQ_A7RG_01	0.534	0.7239	0.5862	0.3242	0.7545	0.5952	0.7853	0.3493	0.796	0.6732	0.8624	0.5698	0.7538	0.424	0.5494	0.5578	0.9259	0.9466	0.8678	0.8894	0.5677	0.4795	0.6781	0.5261	0.7293
TCGA_TQ_A7RH_01	0.0344	0.4098	0.0212	0.0636	0.7592	0.4376	0.7319	0.3734	0.6991	0.4199	0.2121	0.3331	0.1109	0.2787	0.6048	0.809	0.9348	0.9181	0.8672	0.9119	0.4026	0.4386	0.7178	0.2643	0.8466
TCGA_TQ_A7RI_01	0.1961	0.6387	0.2006	0.1093	0.7193	0.5637	0.8057	0.3559	0.737	0.6468	0.7276	0.1362	0.0832	0.383	0.4322	0.7383	0.8915	0.8717	0.5473	0.8797	0.341	0.5703	0.7457	0.7148	0.4464
TCGA_TQ_A7RJ_01	0.7024	0.709	0.4357	0.4917	0.6716	0.6394	0.7729	0.4144	0.7046	0.6673	0.8137	0.7448	0.551	0.4755	0.5079	0.7053	0.8931	0.8676	0.8525	0.8076	0.6263	0.5085	0.7862	0.6652	0.786
TCGA_TQ_A7RK_01	0.9246	0.3306	0.6962	0.7045	0.8445	0.3787	0.8544	0.6518	0.6548	0.8344	0.931	0.7325	0.4995	0.3964	0.4081	0.8339	0.9782	0.9256	0.8931	0.8949	0.5818	0.4239	0.6597	0.5189	0.7308
TCGA_TQ_A7RK_02	0.78	0.50185	0.5889	0.6511	0.8403	0.43805	0.8393	0.65005	0.5837	0.7272	0.83145	0.6141	0.51375	0.44865	0.39235	0.7948	0.93355	0.9044	0.86285	0.7473	0.579	0.5229	0.76035	0.6222	0.77955
TCGA_TQ_A7RM_01	0.0733	0.8177	0.2891	0.0707	0.8471	0.5342	0.8639	0.5056	0.5877	0.6446	0.7505	0.3114	0.3597	0.7122	0.324	0.8828	0.1083	0.9712	0.6989	0.902	0.382	0.5481	0.7695	0.7956	0.9124
TCGA_TQ_A7RN_01	0.4423	0.4162	0.2101	0.1168	0.7566	0.6069	0.8343	0.3509	0.7954	0.6158	0.7766	0.3561	0.6977	0.6348	0.6131	0.8108	0.9402	0.95	0.8763	0.9267	0.4524	0.1454	0.6363	0.8209	0.8059
TCGA_TQ_A7RO_01	0.3414	0.5854	0.5226	0.3507	0.7471	0.5862	0.8444	0.6209	0.4274	0.6114	0.6869	0.6037	0.3514	0.527	0.5367	0.7725	0.8671	0.9045	0.8476	0.8297	0.5175	0.5725	0.7025	0.8263	0.8741
TCGA_TQ_A7RP_01	0.0343	0.3708	0.017	0.0779	0.4225	0.2934	0.4695	0.2393	0.1986	0.2787	0.2097	0.0516	0.136	0.1751	0.1408	0.1555	0.5738	0.0481	0.1101	0.1089	0.0804	0.1184	0.1984	0.4406	0.5345
TCGA_TQ_A7RQ_01	0.2453	0.6895	0.1136	0.1987	0.8634	0.642	0.8712	0.7335	0.8442	0.734	0.8191	0.7373	0.1279	0.3917	0.2126	0.6177	0.9572	0.7385	0.5587	0.9212	0.634	0.6481	0.8086	0.5071	0.4161
TCGA_TQ_A7RR_01	0.6652	0.6293	0.4676	0.5037	0.6777	0.571	0.6901	0.4436	0.6129	0.6211	0.7516	0.5776	0.1085	0.3839	0.4383	0.7234	0.8391	0.7587	0.7613	0.8749	0.5181	0.5953	0.6948	0.3172	0.7317
TCGA_TQ_A7RS_01	0.0261	0.4861	0.0253	0.0764	0.8738	0.7197	0.8841	0.42	0.2445	0.7606	0.727	0.3323	0.871	0.7462	0.4667	0.802	0.9366	0.9597	0.8809	0.9335	0.6632	0.1836	0.8192	0.4654	0.8534
TCGA_TQ_A7RU_01	0.9356	0.7721	0.8382	0.6373	0.9052	0.7576	0.8705	0.7736	0.56	0.8238	0.8619	0.8022	0.8887	0.7995	0.4233	0.8833	0.9625	0.9768	0.9192	0.9102	0.5761	0.3116	0.7903	0.906	0.9126
TCGA_TQ_A7RV_01	0.5059	0.7086	0.5714	0.4142	0.7905	0.5974	0.8109	0.5314	0.6076	0.7527	0.8383	0.2751	0.5956	0.4919	0.5747	0.6119	0.914	0.873	0.8427	0.884	0.5785	0.6627	0.7058	0.3101	0.8726
TCGA_TQ_A7RV_02	0.5388	0.5882	0.4636	0.3011	0.642	0.4988	0.6267	0.3895	0.5385	0.5795	0.7052	0.154	0.5282	0.4526	0.4735	0.5732	0.7228	0.6325	0.6831	0.7078	0.5159	0.5577	0.5813	0.3257	0.4821
TCGA_TQ_A7RW_01	0.6926	0.7048	0.5563	0.463	0.6933	0.5161	0.589	0.4936	0.3968	0.7084	0.7358	0.6065	0.1344	0.3587	0.3744	0.5995	0.9195	0.846	0.779	0.8449	0.474	0.5353	0.6682	0.3076	0.4009
TCGA_TQ_A8XE_01	0.2855	0.7083	0.1068	0.2292	0.8014	0.6594	0.7727	0.595	0.7626	0.7617	0.7091	0.2425	0.0526	0.1559	0.5051	0.7983	0.9423	0.7154	0.4951	0.9378	0.3477	0.3611	0.7112	0.5112	0.8575
TCGA_TQ_A8XE_02	0.4845	0.6931	0.5052	0.2073	0.5728	0.6593	0.7393	0.2146	0.7766	0.7545	0.8001	0.5485	0.1047	0.1733	0.5704	0.7316	0.9275	0.5591	0.432	0.9193	0.6593	0.2505	0.7344	0.2191	0.7137
TCGA_VM_A8C8_01	0.7968	0.5992	0.4159	0.4203	0.7368	0.4669	0.7237	0.4006	0.7742	0.7042	0.7828	0.5892	0.0526	0.5663	0.601	0.474	0.9648	0.8815	0.8253	0.899	0.4538	0.6553	0.8064	0.5266	0.6127
TCGA_VM_A8C9_01	0.0332	0.3529	0.0175	0.045	0.0486	0.1018	0.2481	0.0155	0.1917	0.2972	0.222	0.0337	0.1317	0.1866	0.1503	0.0932	0.5205	0.3299	0.1775	0.6168	0.0621	0.1028	0.3452	0.3398	0.4059
TCGA_VM_A8CA_01	0.3537	0.6338	0.338	0.2204	0.7302	0.5407	0.6885	0.569	0.7401	0.6091	0.6655	0.5199	0.0991	0.2403	0.3177	0.5832	0.8394	0.8334	0.8215	0.8868	0.4717	0.2407	0.61	0.8086	0.7967
TCGA_VM_A8CB_01	0.0492	0.4721	0.0296	0.0502	0.8462	0.707	0.8638	0.0833	0.0605	0.784	0.2216	0.8395	0.7241	0.66	0.6413	0.7048	0.9397	0.9511	0.9295	0.8994	0.6747	0.1799	0.8146	0.9382	0.9155
TCGA_VM_A8CD_01	0.0208	0.3202	0.0138	0.0544	0.0581	0.0852	0.2182	0.0216	0.062	0.1872	0.127	0.0301	0.0815	0.1055	0.2913	0.5583	0.3132	0.0262	0.0775	0.0833	0.2621	0.0872	0.3672	0.3226	0.39
TCGA_VM_A8CE_01	0.0289	0.4988	0.1066	0.0518	0.6639	0.5022	0.732	0.2684	0.6066	0.5335	0.5602	0.3499	0.3146	0.2769	0.4299	0.5595	0.8453	0.7933	0.7807	0.8811	0.4547	0.3484	0.5591	0.4912	0.8373
TCGA_VM_A8CF_01	0.7786	0.6585	0.3556	0.5782	0.7543	0.5809	0.6458	0.4644	0.8468	0.6599	0.7488	0.5942	0.6317	0.4383	0.4786	0.6489	0.9267	0.7961	0.5754	0.9139	0.5435	0.6232	0.6816	0.2547	0.7135
TCGA_VM_A8CH_01	0.6872	0.4585	0.6266	0.699	0.7382	0.401	0.457	0.2025	0.4101	0.7634	0.6292	0.8111	0.3883	0.3821	0.5138	0.7956	0.9083	0.8773	0.7928	0.8929	0.6354	0.2386	0.6723	0.4775	0.9089
TCGA_VV_A829_01	0.0316	0.7044	0.3813	0.05	0.7393	0.7854	0.7656	0.116	0.2635	0.8311	0.8383	0.7522	0.0758	0.1727	0.2015	0.2391	0.4254	0.9522	0.8991	0.9103	0.6507	0.6702	0.7585	0.1957	0.2281
TCGA_VV_A86M_01	0.074	0.7848	0.681	0.3473	0.9144	0.8025	0.8399	0.4351	0.7582	0.8783	0.9104	0.6232	0.4651	0.7606	0.6526	0.8841	0.9786	0.8945	0.8391	0.9058	0.7802	0.7639	0.7628	0.1709	0.6172
TCGA_VW_A7QS_01	0.9027	0.7243	0.784	0.7754	0.8047	0.2436	0.8418	0.7022	0.8523	0.7917	0.7918	0.827	0.4946	0.5097	0.2857	0.8641	0.9372	0.879	0.5573	0.9028	0.6144	0.7124	0.7881	0.8859	0.7707
TCGA_VW_A8FI_01	0.0237	0.2157	0.0144	0.046	0.0289	0.094	0.2699	0.0139	0.2009	0.1369	0.0569	0.022	0.0497	0.0667	0.0952	0.0515	0.2064	0.0271	0.058	0.0907	0.0777	0.0788	0.2546	0.1695	0.3232
TCGA_W9_A837_01	0.0281	0.5956	0.0442	0.0759	0.7364	0.4559	0.7666	0.4624	0.4615	0.6033	0.6283	0.5149	0.6569	0.469	0.5143	0.7943	0.8794	0.8316	0.778	0.8792	0.4025	0.5702	0.6887	0.7965	0.7446
TCGA_WH_A86K_01	0.8289	0.739	0.5718	0.66	0.8315	0.6767	0.7187	0.6961	0.5663	0.7521	0.7848	0.6399	0.5889	0.4899	0.3612	0.797	0.93	0.9403	0.8677	0.8401	0.5909	0.7211	0.7356	0.5177	0.8959
TCGA_WY_A858_01	0.1184	0.6425	0.2695	0.1261	0.723	0.6313	0.718	0.4131	0.6586	0.6392	0.6312	0.4888	0.3095	0.2816	0.4312	0.68	0.8368	0.6744	0.5931	0.8619	0.6045	0.3915	0.6278	0.3399	0.6168
TCGA_WY_A859_01	0.7485	0.6131	0.5186	0.5527	0.789	0.6195	0.8091	0.6119	0.6045	0.6035	0.7044	0.377	0.6423	0.2781	0.5087	0.7547	0.8379	0.8472	0.6148	0.894	0.5359	0.6225	0.6721	0.2671	0.9005
TCGA_WY_A85A_01	0.3344	0.651	0.0986	0.1024	0.6883	0.5907	0.7065	0.2065	0.4617	0.6507	0.757	0.6391	0.4651	0.4014	0.4197	0.7426	0.9395	0.7885	0.7668	0.8776	0.5556	0.4862	0.6313	0.3188	0.8836
TCGA_WY_A85B_01	0.6672	0.7518	0.6072	0.2329	0.8618	0.6949	0.7936	0.5115	0.8485	0.7638	0.6716	0.784	0.535	0.3999	0.6559	0.5154	0.9706	0.897	0.8599	0.9289	0.6957	0.2297	0.5544	0.7268	0.9206
TCGA_WY_A85C_01	0.8632	0.6585	0.6648	0.2509	0.8549	0.6527	0.7514	0.5378	0.8383	0.6846	0.599	0.8038	0.0893	0.6139	0.5895	0.7958	0.9144	0.8686	0.82	0.8641	0.3323	0.6985	0.7595	0.7516	0.6249
TCGA_WY_A85D_01	0.8136	0.7749	0.647	0.6453	0.8386	0.6595	0.7742	0.6889	0.8077	0.7952	0.8385	0.5591	0.3343	0.3948	0.5957	0.7528	0.9488	0.9253	0.8665	0.9174	0.5848	0.681	0.7538	0.6484	0.8103
TCGA_WY_A85E_01	0.0491	0.441	0.4118	0.1171	0.7973	0.4099	0.748	0.5653	0.4344	0.6126	0.8126	0.724	0.5639	0.294	0.6257	0.4305	0.918	0.8637	0.8123	0.9257	0.629	0.609	0.7065	0.4283	0.8522

## Sheet: exp
Gene	EFEMP2	EMP3	FBXO17	METTL7B	SERPINA5	SSTR5	TIMP1	TMEM61	VAV3
TCGA_CS_4938_01	7.5263	6.3044	5.0394	6.3197	2.9473	2.1231	6.2577	0.879	2.6902
TCGA_CS_4941_01	10.3819	10.1736	9.2072	9.5922	5.5513	1.6184	11.0219	3.3178	10.18
TCGA_CS_4942_01	6.8736	4.7707	4.4889	5.4564	2.459	3.9248	7.2401	0	4.2474
TCGA_CS_4943_01	6.1519	4.7938	4.3621	5.8017	1.2043	1.8514	7.1148	0	3.5153
TCGA_CS_4944_01	11.1427	8.234	9.1899	11.0518	5.352	1.8163	8.4112	2.3319	5.9192
TCGA_CS_5390_01	7.8633	4.5852	5.7337	5.7631	2.6953	2.8494	7.1077	0.791	3.2324
TCGA_CS_5393_01	8.4462	5.3837	5.9239	5.2216	1.9352	3.4173	7.1188	0.489	5.2059
TCGA_CS_5394_01	6.7512	3.1746	4.5699	5.5598	1.7407	1.7407	7.0963	0	4.7777
TCGA_CS_5395_01	10.3674	8.4319	9.989	10.8887	2.2335	0.4545	10.0949	1.0778	6.9184
TCGA_CS_5396_01	6.8354	6.0651	3.2146	6.9931	4.6574	1.5062	8.1285	0.6902	5.4272
TCGA_CS_5397_01	11.1299	10.9529	9.0274	10.7932	8.9084	1.229	11.5684	3.5549	9.2634
TCGA_CS_6186_01	10.1689	8.9247	9.8179	6.2813	2.5738	0	9.9738	1.3139	11.417
TCGA_CS_6188_01	10.9831	11.3434	9.2502	11.9337	7.6691	0.7852	12.0773	3.2201	9.1287
TCGA_CS_6290_01	7.3495	6.7186	5.6355	6.0744	4.1893	3.2662	7.4525	1.1974	3.5579
TCGA_CS_6665_01	8.2334	8.2938	5.9144	8.1202	7.0238	0	9.3556	3.6851	4.3686
TCGA_CS_6666_01	7.442	6.2687	4.1329	6.2532	3.4498	2.8488	8.8918	0	4.4105
TCGA_CS_6667_01	7.6297	4.8927	5.7209	6.8733	3.0776	2.9511	7.5636	0.4377	3.54
TCGA_CS_6668_01	6.3295	4.3283	4.3526	4.6358	0.7499	1.4353	5.9061	0	3.9045
TCGA_CS_6669_01	9.0766	6.3418	7.2747	4.2289	0.9338	0	7.5897	3.6298	7.0454
TCGA_CS_6670_01	8.4486	5.2124	6.6895	6.1929	0.4603	2.0023	7.637	1.3238	3.0902
TCGA_DB_5270_01	8.6655	6.6952	6.8137	6.6665	3.5741	2.3481	8.9334	2.3481	6.3839
TCGA_DB_5273_01	8.6276	6.4394	6.4801	8.8705	3.9927	3.6076	8.3988	2.4747	4.0298
TCGA_DB_5274_01	8.6454	7.9977	5.149	7.1301	4.4002	2.1533	11.1013	1.1039	5.7668
TCGA_DB_5275_01	6.759	5.8576	4.5232	6.2727	1.9997	2.8742	7.9616	0.7368	5.1012
TCGA_DB_5276_01	8.2528	6.452	6.4212	6.8304	4.2003	2.3415	7.875	2.5381	4.7687
TCGA_DB_5277_01	7.4976	6.7696	5.3946	6.8108	1.4621	1.4621	7.2506	1.0377	5.3946
TCGA_DB_5278_01	9.4355	5.5882	6.8538	5.0273	0.6958	1.7988	6.7203	0.6958	3.3642
TCGA_DB_5279_01	7.2492	6.0249	5.8146	6.4597	2.915	1.207	6.9311	0.7261	4.5388
TCGA_DB_5280_01	6.7173	4.3681	4.4399	5.4987	0.7671	3.8763	6.7316	0	2.647
TCGA_DB_5281_01	7.7174	6.1035	6.3211	7.9223	3.7727	2.959	8.406	1.3063	5.8979
TCGA_DB_A4X9_01	8.4403	3.7002	4.966	5.269	1.0309	4.2277	5.8015	0	2.7523
TCGA_DB_A4XA_01	8.3595	6.218	6.1183	7.1756	0.6343	3.888	7.6343	0	3.1261
TCGA_DB_A4XB_01	10.3364	4.7095	8.8423	4.4158	1.3819	3.8992	5.4182	2.0746	4.9781
TCGA_DB_A4XC_01	7.9011	5.9455	6.3584	6.074	1.8289	3.5667	7.6446	0.7121	4.6213
TCGA_DB_A4XD_01	7.3192	4.1087	5.542	4.6101	1.7613	4.2239	6.3453	0	3.7472
TCGA_DB_A4XE_01	7.7819	5.3008	6.5801	4.8979	1.2462	4.337	7.352	1.5005	5.1417
TCGA_DB_A4XF_01	7.5396	6.0549	5.6264	7.1148	5.418	3.7374	8.0201	0.5602	4.2138
TCGA_DB_A4XG_01	7.1788	3.2713	5.5922	7.0629	0	3.5183	6.328	0	4.6323
TCGA_DB_A4XH_01	9.3915	6.36	7.2291	6.5923	1.9107	3.8326	7.6849	0	3.6543
TCGA_DB_A64L_01	8.0375	6.8002	6.8533	7.8087	3.152	2.2365	8.2304	1.5141	4.8732
TCGA_DB_A64O_01	10.6527	9.7402	8.6772	9.8697	6.1579	0	10.5809	3.8112	7.74
TCGA_DB_A64P_01	7.4988	5.4019	5.1168	8.6825	4.2565	1.8186	8.0133	0	3.0287
TCGA_DB_A64Q_01	7.2476	4.3993	4.3421	5.7195	1.1575	0.8643	6.076	0.4959	2.2303
TCGA_DB_A64R_01	8.0788	3.8157	5.8622	4.0865	0	2.2857	6.0427	1.5548	3.1296
TCGA_DB_A64S_01	7.7139	5.484	5.1463	7.9559	4.147	2.7865	8.2449	1.3074	4.4686
TCGA_DB_A64U_01	8.024	4.4906	5.4707	4.2789	2.2738	2.3839	6.2943	0	2.2738
TCGA_DB_A64V_01	8.5061	8.2983	6.1037	8.3218	3.3918	1.8439	8.7613	2.0077	3.7568
TCGA_DB_A64W_01	7.7982	5.2924	6.8691	6.2318	2.1866	2.9375	7.1742	2.0385	5.5327
TCGA_DB_A64X_01	7.8003	5.9781	5.2976	7.5163	2.1797	3.0109	7.9432	0	4.0561
TCGA_DB_A75K_01	8.582	6.8296	5.5891	8.7507	2.865	2.4117	10.5121	1.1233	4.1925
TCGA_DB_A75L_01	7.9793	5.2519	5.9827	6.6373	1.1355	4.2137	7.3092	1.5825	4.6403
TCGA_DB_A75M_01	7.3487	4.7686	4.8818	7.4947	2.041	3.9714	7.1595	0	2.3235
TCGA_DB_A75O_01	10.9508	6.5313	6.072	8.7881	4.0735	2.7793	7.5096	0.6658	3.9142
TCGA_DB_A75P_01	11.2823	10.5836	9.3516	13.4222	8.5428	0.5491	13.1142	3.8512	9.4104
TCGA_DH_5140_01	9.4084	8.7308	7.6964	8.9927	3.6254	0	11.644	1.5579	5.3178
TCGA_DH_5141_01	7.8268	6.6427	6.2379	6.6042	4.004	1.0897	8.4326	0.4606	3.6622
TCGA_DH_5142_01	9.7127	7.2385	3.6548	7.6302	4.2292	4.0515	7.9549	3.2225	4.7006
TCGA_DH_5143_01	7.5484	5.5542	5.6324	4.8414	1.6975	2.8789	7.6857	1.5207	5.2626
TCGA_DH_5144_01	7.0601	4.6302	5.3437	5.4204	0	2.675	6.678	0.3971	3.5957
TCGA_DH_A669_01	6.7001	5.3988	4.5889	7.2166	4.8027	2.7584	8.811	0.6315	3.8258
TCGA_DH_A669_02	8.1795	6.2682	4.5033	8.4424	3.5413	2.305	10.6283	0	3.4402
TCGA_DH_A66B_01	6.4836	6.4633	3.1588	7.8307	3.617	3.1588	7.749	0	4.6559
TCGA_DH_A66D_01	7.0796	5.1112	4.547	8.2269	2.9899	3.561	7.2465	1.3466	3.7794
TCGA_DH_A66F_01	8.5301	5.4923	5.1128	7.071	3.5124	0.5591	7.1927	0	3.7843
TCGA_DH_A66G_01	7.8416	7.3121	6.2528	7.7744	5.1794	3.0696	8.9881	3.1425	3.6218
TCGA_DH_A7UR_01	9.044	6.8522	6.4115	8.6619	3.2163	3.7272	9.5473	0.4802	5.4993
TCGA_DH_A7US_01	9.7879	5.6621	5.1251	4.8703	1.5935	2.4434	6.7914	1.3864	3.4175
TCGA_DH_A7UT_01	10.4067	8.8171	5.432	7.9422	3.715	3.8366	7.683	1.4505	1.9592
TCGA_DH_A7UU_01	7.3458	4.5338	5.2457	5.3722	3.5686	5.1429	6.5941	0	2.1624
TCGA_DH_A7UV_01	7.2179	4.9234	4.8867	6.4196	0.4658	5.5812	6.4132	0	3.3961
TCGA_DU_5847_01	11.5224	11.4184	9.3561	11.1292	4.5891	0	11.5453	2.8057	9.534
TCGA_DU_5849_01	8.4334	6.9209	7.0019	7.3899	2.3089	1.9023	7.8346	1.9023	5.2174
TCGA_DU_5851_01	9.1484	6.9401	7.0854	7.0617	4.5815	1.4259	7.9696	2.3359	5.8834
TCGA_DU_5852_01	10.6392	10.0801	9.6316	9.8114	5.8719	0.434	11.7563	2.1731	10.2339
TCGA_DU_5853_01	8.3488	6.1671	5.2468	6.3416	1.5487	3.9306	8.0819	0	4.2555
TCGA_DU_5854_01	10.4964	10.5613	9.2303	12.1892	7.3743	0.4647	11.7928	3.4435	9.4748
TCGA_DU_5855_01	7.1014	6.8489	5.2593	9.6474	2.0186	4.1933	7.9215	1.2366	3.8643
TCGA_DU_5870_01	7.2804	5.4194	5.6032	5.4316	2.0945	2.5172	6.99	0.7882	4.4646
TCGA_DU_5870_02	6.8039	5.425	4.6036	5.3445	4.3796	3.7889	7.9412	0.4735	4.5567
TCGA_DU_5871_01	7.154	8.1726	5.6874	8.3511	2.4085	3.4835	7.5655	0.8347	3.2058
TCGA_DU_5872_01	7.2241	6.0343	6.2337	6.4438	5.5802	3.11	8.2376	0	4.4475
TCGA_DU_5872_02	10.1325	10.4032	6.5252	10.127	6.4033	0	13.4811	2.2417	7.1462
TCGA_DU_5874_01	7.6739	5.2797	5.0197	6.9457	2.7074	2.1678	8.1687	0	3.9594
TCGA_DU_6392_01	9.9611	7.9575	7.8449	8.3643	8.8279	1.0689	11.9391	3.7682	7.6338
TCGA_DU_6393_01	7.0943	4.4027	3.8515	5.9892	2.2856	2.207	6.723	0	5.1336
TCGA_DU_6394_01	5.7581	5.3911	3.6586	13.2582	4.9602	0.6122	8.7121	1.215	7.3581
TCGA_DU_6395_01	6.7496	5.182	4.5891	6.7957	0.4324	4.2872	7.134	0.7647	2.6422
TCGA_DU_6396_01	6.7038	6.0108	2.9415	6.2128	5.1732	2.8774	7.9062	0.4159	4.7933
TCGA_DU_6397_01	7.0569	5.3937	5.7471	5.7672	4.5601	2.8876	7.2655	0	4.5369
TCGA_DU_6397_02	8.4942	5.7559	5.1173	6.0677	6.3716	3.6132	10.5971	0.5356	5.6566
TCGA_DU_6399_01	6.9172	4.725	4.9911	5.2667	2.5903	3.8804	7.8767	0.4166	1.7414
TCGA_DU_6400_01	7.2827	5.7361	5.7942	5.0931	2.6952	1.7926	8.7576	1.2443	4.8269
TCGA_DU_6401_01	8.3344	5.4369	5.6353	6.2261	4.0505	3.4569	8.4393	0	2.805
TCGA_DU_6402_01	12.0056	11.0927	9.8749	13.0883	5.8201	0	15.0756	3.2235	9.1839
TCGA_DU_6403_01	9.9455	9.0445	9.163	9.0145	8.9617	0.7662	10.9491	2.2794	7.2843
TCGA_DU_6404_01	9.5863	9.5368	8.5425	5.9725	4.7213	0.6338	10.9505	1.2505	8.0378
TCGA_DU_6404_02	9.59825	9.17435	4.7883	4.033	3.1009	2.08755	10.4449	1.32555	7.19645
TCGA_DU_6405_01	10.7791	11.0996	9.5666	11.7561	6.5425	0.4252	11.2373	3.1513	9.7357
TCGA_DU_6406_01	10.7198	10.9548	10.1361	11.1604	5.6305	0.9511	12.0587	2.1449	9.3999
TCGA_DU_6407_01	6.9391	4.3667	5.1196	6.0737	1.7466	4.1605	6.7468	0.4778	2.8643
TCGA_DU_6407_02	7.6933	7.53235	5.0124	8.59815	4.1633	2.3329	9.7885	1.80405	6.6115
TCGA_DU_6408_01	7.5563	5.2378	4.9913	7.8803	2.617	3.9648	7.4165	0.84	4.319
TCGA_DU_6410_01	6.6181	3.2122	4.2869	6.172	3.4491	2.1068	8.0458	0.4122	4.335
TCGA_DU_6542_01	7.7703	5.7035	4.4547	7.3071	3.414	4.1293	7.2548	1.1423	6.2064
TCGA_DU_7006_01	10.953	10.9319	9.1274	12.2104	9.2663	0	13.4822	1.9524	9.0592
TCGA_DU_7007_01	7.4037	8.1824	4.497	9.4107	5.704	0.4136	8.9436	3.2172	5.9716
TCGA_DU_7008_01	6.8333	4.9338	5.482	4.6629	0.8358	4.7775	6.96	1.2068	4.6924
TCGA_DU_7009_01	8.2909	4.3597	5.6081	6.3332	2.3804	1.8892	6.0357	1.1387	4.4418
TCGA_DU_7010_01	7.6345	7.4652	5.3815	6.3746	6.0466	2.005	8.8236	2.005	4.9883
TCGA_DU_7011_01	8.4226	7.1125	7.2292	7.2074	2.559	2.3618	9.0141	0.8097	5.6526
TCGA_DU_7012_01	10.5232	10.7706	8.4893	9.8506	6.629	0	12.3012	4.1649	7.4812
TCGA_DU_7013_01	10.1501	8.966	8.9264	11.3175	6.6487	0	11.1679	3.6587	9.7271
TCGA_DU_7014_01	7.6289	6.7881	5.9409	8.1737	4.8538	2.4858	8.4989	0.386	2.835
TCGA_DU_7015_01	7.0301	5.3877	4.3184	6.2006	2.1869	3.2612	6.6595	0.3742	4.1361
TCGA_DU_7018_01	7.4539	5.3995	5.3473	5.4415	2.8061	3.4905	7.6763	0.3217	3.8316
TCGA_DU_7019_01	7.5675	6.542	6.8556	8.1575	2.7349	0.4145	8.7581	0.736	4.9046
TCGA_DU_7290_01	10.5304	10.7358	8.1387	9.9776	9.1696	1.9641	11.3617	2.9581	6.3732
TCGA_DU_7292_01	10.1417	10.3937	9.195	10.7347	5.1365	0.7126	10.5519	3.8494	8.4223
TCGA_DU_7294_01	7.8283	4.7628	5.4343	5.542	0.4171	3.4225	6.7132	0	2.8815
TCGA_DU_7298_01	7.8502	6.1552	6.1072	8.249	5.7566	2.9996	8.2183	1.1152	6.0825
TCGA_DU_7299_01	6.4553	5.2357	4.4518	8.1552	1.3821	1.2257	6.442	0.3422	6.4331
TCGA_DU_7300_01	8.8278	8.034	7.4408	8.023	3.493	3.0497	8.7851	2.6542	5.0196
TCGA_DU_7301_01	6.7853	6.3177	4.328	7.3368	2.4623	2.6334	7.5942	0	4.0842
TCGA_DU_7302_01	7.702	5.5017	6.3415	7.225	2.8349	0.4231	7.1917	1.2408	4.5118
TCGA_DU_7304_01	8.3518	6.4547	6.5554	6.8032	2.0609	2.1779	7.4696	1.0409	5.7795
TCGA_DU_7304_02	8.1225	7.2918	4.6411	7.1919	2.8049	1.3202	9.0846	0.8061	2.4571
TCGA_DU_7306_01	6.652	4.5358	4.4123	7.3063	4.4123	1.5373	6.7865	0	3.394
TCGA_DU_7309_01	8.4684	5.4399	6.7698	5.7573	1.557	2.0831	7.5101	2.2883	4.7838
TCGA_DU_8158_01	10.5192	10.5073	9.162	11.8011	7.7006	2.1626	11.5311	3.0856	6.7149
TCGA_DU_8161_01	10.5205	9.4756	8.7391	10.2748	3.1488	0	10.6725	2.2116	10.5179
TCGA_DU_8162_01	9.1427	8.5676	8.416	7.8649	6.7653	0	10.0404	2.8913	9.0062
TCGA_DU_8163_01	7.246	4.6428	4.8803	6.9654	1.1502	3.9665	6.3266	0	3.3136
TCGA_DU_8164_01	7.3465	4.5938	5.813	5.4393	0.877	0.3549	6.4458	0	4.4539
TCGA_DU_8165_01	10.3091	9.2273	8.1524	7.0769	3.9321	0.4599	11.2003	2.1304	6.6827
TCGA_DU_8166_01	7.1257	6.0174	5.166	4.4763	0.7089	3.7414	7.4423	0.3976	4.1806
TCGA_DU_8167_01	8.198	8.2796	5.5243	6.6228	3.4044	3.5138	7.6931	1.4155	3.5655
TCGA_DU_8168_01	6.6055	5.3855	5.4488	6.6866	3.5005	2.9635	7.0907	1.2672	4.9766
TCGA_DU_A5TP_01	10.1848	7.9039	7.6997	8.7741	2.7543	1.9537	10.4521	3.9418	6.9075
TCGA_DU_A5TR_01	8.7521	8.8506	5.3148	7.9842	6.8957	3.5953	9.5061	3.2195	4.3506
TCGA_DU_A5TS_01	7.9201	5.6072	6.0867	6.3616	1.1636	3.9318	7.1282	0	3.2751
TCGA_DU_A5TT_01	10.7052	10.8453	8.5409	10.2612	6.0398	2.0085	11.5985	2.7258	7.6602
TCGA_DU_A5TU_01	8.5849	8.4691	5.5455	9.1649	5.1579	2.6037	11.3312	3.1073	5.8507
TCGA_DU_A5TW_01	6.539	3.1636	3.9215	6.0828	2.439	4.8731	5.9955	0	2.439
TCGA_DU_A5TY_01	10.3127	10.9708	9.0202	10.2012	6.8982	0	11.6914	3.8219	8.9845
TCGA_DU_A6S2_01	8.3547	5.5365	6.6544	6.6544	2.6651	1.6898	7.5682	2.0415	4.7926
TCGA_DU_A6S3_01	8.2517	5.6308	6.5092	5.2302	1.3228	3.1712	7.2776	1.0007	4.3233
TCGA_DU_A6S6_01	8.2571	4.87	6.7895	5.5823	0	2.6475	6.1279	2.9452	4.1501
TCGA_DU_A6S7_01	7.5005	2.8848	5.7493	4.7533	0	3.9116	6.4072	0	3.0422
TCGA_DU_A6S8_01	7.5668	5.78	5.1734	5.2912	2.7445	3.352	8.3889	0	3.5807
TCGA_DU_A76K_01	10.4579	9.8819	10.1834	7.2692	3.3753	0.9782	10.1917	1.8427	7.5977
TCGA_DU_A76L_01	10.9975	10.0275	8.4248	9.1156	7.1351	0	13.907	3.1607	8.304
TCGA_DU_A76O_01	7.6056	5.5833	4.3779	5.483	1.5064	4.7915	8.0633	0.5462	4.4094
TCGA_DU_A76R_01	8.3244	7.3789	5.8841	6.6198	7.6221	0.5226	9.5066	1.2076	5.8408
TCGA_DU_A7T6_01	8.5303	7.4674	5.0348	5.429	6.108	0.3722	10.3288	2.2707	5.0348
TCGA_DU_A7T8_01	8.5619	7.0951	4.8073	5.2372	4.521	4.9486	11.8434	1.8156	4.8073
TCGA_DU_A7TA_01	7.7623	4.9285	3.2262	5.4975	2.196	4.4656	8.0448	0	5.3221
TCGA_DU_A7TB_01	9.7513	7.0543	8.5398	6.6546	3.8084	0.4451	10.1978	1.0595	6.1373
TCGA_DU_A7TC_01	8.1488	5.31	6.6129	5.716	3.0056	2.0444	7.2569	2.7781	3.9498
TCGA_DU_A7TD_01	10.4347	9.7727	9.2262	10.9934	7.1536	0.5183	11.3902	2.904	8.6503
TCGA_DU_A7TG_01	9.0785	7.4046	8.1269	5.7369	2.5622	1.0636	8.8488	3.1096	6.1451
TCGA_DU_A7TI_01	7.056	6.7856	5.4832	6.3558	0.9066	4.0655	7.0224	0.5234	3.7742
TCGA_DU_A7TJ_01	10.5097	10.8385	10.0097	11.6085	5.6071	0.9813	11.7572	2.7052	9.9849
TCGA_E1_5302_01	8.7916	9.5158	7.3917	7.3264	6.3562	3.0751	8.3619	3.0066	5.6057
TCGA_E1_5303_01	7.3809	6.3171	5.0808	7.2588	3.7611	2.5435	7.4016	0	3.3473
TCGA_E1_5304_01	5.7864	3.6965	3.2396	3.9475	1.0396	3.7351	6.0619	0.435	3.616
TCGA_E1_5305_01	7.9184	5.7882	5.5683	8.1097	3.0669	1.6647	8.591	0.9016	5.3856
TCGA_E1_5307_01	6.6547	4.8567	5.4	5.5322	1.5061	1.3059	6.1485	0.7959	3.7167
TCGA_E1_5311_01	7.5219	4.7515	5.9927	5.9137	2.3259	3.1242	7.0636	0.9458	4.878
TCGA_E1_5318_01	7.6131	4.3076	4.3875	3.7041	4.4632	3.3255	9.2969	0	6.4634
TCGA_E1_5319_01	8.1237	8.0046	5.5602	7.8067	5.6894	1.5888	9.1641	0.8506	4.8435
TCGA_E1_5322_01	6.1728	4.9844	3.9505	7.8422	1.9605	3.0409	6.926	0.9012	5.3747
TCGA_E1_A7YD_01	9.4531	8.7147	9.0183	9.2689	8.6976	0.5353	10.8407	0.9249	9.0145
TCGA_E1_A7YE_01	8.5688	8.5871	4.1777	9.9798	10.4629	1.3857	7.9919	1.3857	5.4878
TCGA_E1_A7YH_01	7.6083	6.0437	5.0817	5.2792	4.1856	3.0463	6.8488	1.3383	1.7194
TCGA_E1_A7YI_01	8.3214	10.2262	4.5338	10.0284	6.4431	0.7326	11.4618	4.0485	8.532
TCGA_E1_A7YJ_01	11.2164	11.0269	9.3179	10.8821	6.6392	0.7089	12.0891	2.7465	8.6883
TCGA_E1_A7YK_01	9.209	9.3073	6.4998	8.9038	7.7471	1.7879	9.8806	4.9083	5.0575
TCGA_E1_A7YL_01	11.319	11.2667	9.3967	7.1751	7.1712	0.4685	12.0414	4.1912	6.0578
TCGA_E1_A7YM_01	10.5622	9.1067	8.5314	7.0977	6.7404	1.3092	10.1747	1.984	8.2027
TCGA_E1_A7YN_01	9.9751	10.6764	8.7308	11.9659	11.7304	0.6321	12.2725	4.2587	7.0184
TCGA_E1_A7YO_01	8.2998	4.8264	6.0318	6.9089	1.4246	2.7856	8.0996	0.8814	4.0143
TCGA_E1_A7YQ_01	10.0934	10.6606	8.3534	10.3315	6.0966	0.4547	12.2585	1.5122	9.2148
TCGA_E1_A7YS_01	5.3106	3.6643	3.4879	5.953	3.1151	3.8216	5.6411	0	3.7451
TCGA_E1_A7YU_01	8.5142	5.9284	5.774	5.9727	4.5153	3.7399	6.9831	0.5611	4.1791
TCGA_E1_A7YV_01	8.2357	6.4219	6.0099	7.0831	4.2913	2.4677	9.0847	1.4919	5.2193
TCGA_E1_A7YW_01	7.9363	6.7369	6.7712	6.6205	1.5047	3.588	6.1832	1.2499	1.9094
TCGA_E1_A7YY_01	9.0622	7.7402	7.5884	8.9024	1.8757	2.3772	10.4121	2.9754	6.8022
TCGA_E1_A7Z2_01	11.0449	9.1527	9.2579	9.6521	3.594	0.4959	10.2625	1.401	7.7655
TCGA_E1_A7Z3_01	9.4187	7.9368	7.3759	8.6849	5.5614	4.2013	9.8314	2.4524	6.9858
TCGA_E1_A7Z4_01	7.0588	8.3633	4.4826	7.3193	0.8777	3.3523	7.2732	0.5047	2.121
TCGA_E1_A7Z6_01	7.6197	5.9245	5.6278	6.0007	2.3877	2.5119	7.8952	1.2697	2.9232
TCGA_EZ_7264_01	6.9965	4.4206	4.7995	5.2233	0.8789	2.2973	6.0721	0	2.8938
TCGA_F6_A8O3_01	7.3342	4.1488	5.1948	5.9228	0.6229	4.1042	6.2074	0.8559	4.5153
TCGA_F6_A8O4_01	8.2896	5.1338	6.1799	4.2509	0.4093	3.9781	7.1797	0.7277	4.347
TCGA_FG_5962_01	7.8665	6.1721	6.4223	6.2036	4.0492	1.8236	7.8646	1.5384	6.4435
TCGA_FG_5963_01	10.3192	9.9362	6.342	8.8447	6.4181	0.4202	10.9111	4.2156	5.9026
TCGA_FG_5963_02	10.9064	7.7107	5.1595	7.024	8.2059	0	12.5571	0.5473	6.9344
TCGA_FG_5964_01	9.2612	8.5006	7.1935	8.5376	3.8995	2.4606	9.3499	3.6866	5.1456
TCGA_FG_5965_01	7.9075	6.7519	6.2378	7.2891	4.0612	2.8388	8.088	2.1325	4.1134
TCGA_FG_5965_02	9.16845	7.84435	6.6781	7.6831	4.25395	0.9748	8.93575	3.34775	7.5013
TCGA_FG_6688_01	10.3535	10.9546	9.1073	11.2509	8.6489	1.0767	11.0645	4.4151	6.1917
TCGA_FG_6689_01	7.98	6.1822	6.399	6.517	2.2999	2.0943	6.9763	1.9793	4.5383
TCGA_FG_6690_01	6.6061	4.8589	3.9849	5.5078	1.161	4.0581	7.326	0	2.3562
TCGA_FG_6691_01	6.6297	4.5913	6.3858	5.1561	1.9262	3.233	7.1577	0	3.233
TCGA_FG_6692_01	11.545	11.6808	10.174	12.6152	6.1167	0	13.1186	4.4343	7.9883
TCGA_FG_7634_01	9.0085	5.3932	3.8044	8.1769	4.6164	2.2079	9.6624	1.1418	6.752
TCGA_FG_7636_01	7.0342	4.7556	5.1857	7.5854	1.1887	1.9947	6.8912	0.5125	3.7406
TCGA_FG_7637_01	7.8237	5.335	5.6319	6.0576	5.0408	1.2742	8.0178	0	3.1379
TCGA_FG_7638_01	7.8011	5.7524	6.2889	5.8959	1.4513	1.6637	7.1403	0.5197	4.4757
TCGA_FG_7641_01	8.7737	4.191	6.4553	5.2972	1.4246	2.1272	5.9159	0.8814	3.6287
TCGA_FG_7643_01	9.5495	8.6433	8.7172	8.3498	5.8561	0.4464	9.6124	1.4921	9.6016
TCGA_FG_8181_01	9.067	7.7669	7.5543	6.3067	1.747	1.1232	9.1066	3.5847	6.6379
TCGA_FG_8182_01	8.4394	4.2845	5.1668	4.1238	0.7526	4.1238	5.5403	1.0194	3.3077
TCGA_FG_8185_01	6.6808	4.8705	4.4222	5.3461	1.6341	3.1399	7.429	0	3.2805
TCGA_FG_8186_01	9.352	6.0393	5.2427	7.6172	3.1576	2.5418	7.4985	1.6168	4.2674
TCGA_FG_8187_01	8.8809	5.4655	6.035	5.3664	2.1224	2.1224	6.6908	0.5052	2.4886
TCGA_FG_8188_01	7.0936	4.0733	4.7928	4.9627	1.5749	3.0742	6.7533	0	1.5749
TCGA_FG_8189_01	8.5292	5.8466	8.214	4.4578	2.5888	1.7137	6.8455	2.3516	6.461
TCGA_FG_8191_01	7.1902	6.4928	4.6642	7.6295	2.6899	3.3345	7.8179	0.4473	2.5174
TCGA_FG_A4MT_01	9.8891	4.224	4.1191	6.2167	1.8561	4.8336	7.7628	0	5.7739
TCGA_FG_A4MT_02	9.4602	6.8836	6.6337	5.8528	4.2742	2.6421	9.2568	2.3021	6.3467
TCGA_FG_A4MU_01	11.3658	11.316	9.7135	11.6946	6.8222	0	12.3785	2.5681	8.8542
TCGA_FG_A4MW_01	10.7484	10.9055	9.7486	10.7949	6.9785	0	11.3294	3.7413	8.2156
TCGA_FG_A4MX_01	8.0719	5.0056	5.4975	6.2152	2.3266	2.3266	8.4024	0	3.0051
TCGA_FG_A4MY_01	8.2596	7.5487	6.4609	7.8545	4.1496	2.5083	8.4149	1.5896	5.4331
TCGA_FG_A60J_01	8.9514	5.3886	4.5045	8.2556	1.8089	5.3149	7.4164	0	3.7568
TCGA_FG_A60K_01	7.0192	4.3258	5.7301	4.1648	0.5093	1.6402	5.3355	0	3.6843
TCGA_FG_A60L_01	9.371	7.3435	5.9791	6.6411	2.037	4.6017	8.3413	2.3614	3.2137
TCGA_FG_A6IZ_01	6.8939	5.4374	4.9248	5.6132	0	3.8898	7.6165	0.8983	2.1557
TCGA_FG_A6J1_01	9.0709	6.888	6.369	6.5193	1.5927	3.8181	9.1344	2.1789	2.3312
TCGA_FG_A6J3_01	9.2452	10.5831	5.4471	9.6004	6.949	0	11.9928	5.3182	5.2592
TCGA_FG_A70Y_01	8.2685	5.3499	5.908	7.1296	3.0938	2.6879	7.1929	0	3.466
TCGA_FG_A70Z_01	10.5347	9.682	9.0174	9.3043	6.8581	2.0032	11.8606	4.4415	8.941
TCGA_FG_A710_01	7.889	6.9453	6.2905	6.4784	1.7902	2.8014	9.4093	0.7677	3.4376
TCGA_FG_A711_01	8.4058	6.2312	5.7914	5.1015	0	4.2129	6.8293	0.9086	4.3433
TCGA_FG_A713_01	8.9556	6.7367	7.7818	6.6893	1.6581	2.1537	8.1403	2.4093	5.4775
TCGA_FG_A87N_01	9.5949	6.8361	9.1576	9.2476	6.0749	1.6207	9.7702	3.0206	7.2721
TCGA_FG_A87Q_01	10.7812	10.4165	8.606	10.0249	6.8959	0.9975	11.0135	3.4548	8.0956
TCGA_FN_7833_01	8.5446	6.8109	4.2612	7.3788	1.9882	2.3449	9.0476	0	3.6437
TCGA_HT_7467_01	8.3243	6.4711	6.4565	6.5605	4.1941	1.994	8.0646	1.7599	6.4466
TCGA_HT_7468_01	7.4619	4.5751	4.5945	5.2956	1.5509	1.7011	6.9186	0.4023	5.8482
TCGA_HT_7469_01	10.3026	8.7114	7.6461	6.0331	3.2918	0	8.9768	1.3942	9.5307
TCGA_HT_7470_01	8.0775	6.1303	6.7412	6.1759	3.3208	1.6996	7.1365	1.8356	4.4722
TCGA_HT_7471_01	8.2488	6.9367	5.0708	7.5132	2.5004	2.2875	9.9281	0.829	3.8277
TCGA_HT_7472_01	6.5908	5.241	3.6684	6.4039	1.003	3.2277	6.6255	1.003	4.3979
TCGA_HT_7473_01	8.6763	7.5561	5.5482	8.0122	4.9216	1.0697	7.4177	2.1033	4.973
TCGA_HT_7474_01	8.0433	6.9193	7.1205	6.8851	4.5248	2.0691	7.8941	1.9416	4.9464
TCGA_HT_7475_01	8.5328	6.3726	8.1625	6.429	0.4115	3.4896	7.3139	1.2143	6.2277
TCGA_HT_7476_01	9.4243	7.6954	7.0732	5.7933	5.105	3.0024	11.2536	0.868	6.1524
TCGA_HT_7477_01	9.4335	5.4033	7.5724	7.0249	3.5259	2.8095	8.0339	2.0019	8.3991
TCGA_HT_7478_01	7.7529	6.9904	5.137	8.0551	3.8413	1.0183	8.753	2.2512	4.0343
TCGA_HT_7479_01	8.5094	6.6204	6.405	6.2047	1.8689	2.3697	6.6909	1.5334	4.1741
TCGA_HT_7480_01	7.5427	4.6004	5.6243	5.6155	0.3807	3.0961	6.5317	1.1429	3.6059
TCGA_HT_7481_01	8.4522	6.4879	6.6785	7.3668	2.2756	1.343	7.486	0.8224	5.0395
TCGA_HT_7482_01	8.5228	6.2939	4.6172	7.4027	2.4742	2.2622	6.408	0.4644	4.6393
TCGA_HT_7483_01	7.6216	5.7899	5.8636	6.5834	1.6659	3.6951	8.4518	0.7861	4.6999
TCGA_HT_7485_01	7.4709	4.8274	4.6499	6.5169	0.7912	1.2992	6.0526	0.4491	2.2179
TCGA_HT_7601_01	7.9919	6.8255	4.7104	8.2218	4.1138	2.1847	8.6127	1.8001	4.8411
TCGA_HT_7602_01	9.4745	6.4158	6.8797	6.9158	1.6465	2.5078	7.0142	1.188	3.5427
TCGA_HT_7603_01	8.3003	5.6708	7.4867	4.4433	2.7033	1.1999	7.3557	2.552	6.5457
TCGA_HT_7604_01	6.6381	4.0353	3.851	6.575	1.8562	3.2	5.5901	0	3.6772
TCGA_HT_7605_01	8.5146	5.4947	6.6488	5.6006	1.5869	1.4424	6.8591	1.4424	4.7423
TCGA_HT_7606_01	6.636	5.3067	3.4016	8.2232	3.3148	2.0308	9.4022	0.388	5.394
TCGA_HT_7607_01	8.7413	7.4238	7.7559	8.0424	4.8213	0.4187	8.2158	2.7493	5.8887
TCGA_HT_7608_01	9.2738	5.3827	5.5882	5.8301	4.3048	0.4846	8.7272	0.8468	7.2508
TCGA_HT_7609_01	10.1493	4.695	8.1709	7.8171	1.3541	3.7497	6.4557	0	4.5588
TCGA_HT_7610_01	7.9477	4.0177	6.4208	4.8824	0	3.1925	5.701	1.3941	5.0454
TCGA_HT_7611_01	6.4825	4.7076	5.8131	6.5414	2.9098	3.4084	5.7396	0	2.1417
TCGA_HT_7616_01	7.8539	7.9696	5.8197	8.9232	8.4191	0	10.5976	1.576	6.2813
TCGA_HT_7620_01	8.1547	6.0968	6.3692	5.9071	3.825	2.7646	6.823	0.6106	2.9726
TCGA_HT_7676_01	7.5444	4.5975	3.9074	5.9778	1.1378	4.3368	7.0384	0.4856	2.7229
TCGA_HT_7677_01	6.9706	4.7974	5.313	5.8241	1.2968	2.9987	6.9019	0	2.3446
TCGA_HT_7680_01	10.4033	10.1662	8.346	8.376	11.4299	0	10.659	3.2819	3.9465
TCGA_HT_7681_01	8.4494	5.8446	6.9033	6.6331	2.6634	0.9178	7.4202	2.3223	4.51
TCGA_HT_7684_01	7.9167	7.3297	4.4627	8.9273	8.3201	1.4365	9.492	2.3168	3.5618
TCGA_HT_7686_01	9.9609	7.7548	5.7257	7.767	7.1474	2.5244	7.745	2.5244	3.9658
TCGA_HT_7687_01	7.5888	6.2648	6.2846	6.3235	3.9579	3.8199	7.9655	0.7734	5.3477
TCGA_HT_7688_01	7.9996	5.8942	7.3587	6.6777	1.5424	3.3632	6.8379	2.1866	6.0921
TCGA_HT_7689_01	7.5797	6.6835	5.8372	6.9687	3.1424	3.4871	7.2876	1.0153	3.2495
TCGA_HT_7690_01	7.4149	6.5064	6.8589	6.5019	5.6577	3.8368	9.2594	1.5749	5.3328
TCGA_HT_7691_01	10.3578	10.3086	8.2568	8.4433	8.1536	0	12.1633	4.7149	7.8504
TCGA_HT_7692_01	6.764	4.4295	3.8776	8.3653	0.4652	1.5373	7.6819	0.8164	3.5892
TCGA_HT_7693_01	7.2847	7.0064	3.448	9.7256	6.6976	2.5378	8.6114	0	4.8992
TCGA_HT_7694_01	8.6389	6.2601	7.3295	7.235	3.5266	0	7.3816	2.2072	6.2033
TCGA_HT_7695_01	8.5021	4.9749	6.6542	5.032	0.5922	2.7731	6.3203	1.7153	5.5908
TCGA_HT_7854_01	10.1609	9.2992	6.6304	10.0994	6.1434	0.4428	9.5094	2.4089	6.037
TCGA_HT_7855_01	6.4638	3.6321	4.6153	7.6976	2.8187	2.9575	6.3799	0	3.3591
TCGA_HT_7856_01	9.2013	6.419	7.6744	6.8233	4.5515	0.9431	7.6722	2.2297	5.7018
TCGA_HT_7857_01	11.3562	10.6215	7.3736	11.6724	6.5862	0	13.4633	3.1669	8.0857
TCGA_HT_7858_01	7.3817	7.1827	5.3811	7.2785	2.4867	2.3843	7.453	0.4685	4.9863
TCGA_HT_7860_01	10.0056	10.6684	9.7099	10.0939	4.6722	1.2874	10.5541	1.6606	10.254
TCGA_HT_7873_01	6.9231	3.2485	3.944	6.9193	2.2009	3.0348	5.9427	0	3.2485
TCGA_HT_7874_01	8.9638	6.2364	7.5571	6.03	2.5914	1.2268	7.1369	1.8801	6.4395
TCGA_HT_7875_01	9.0501	4.9966	5.6035	5.5664	0.9469	1.7966	6.5027	1.6621	3.7409
TCGA_HT_7877_01	8.2815	5.0569	6.5034	5.3262	2.5	1.9238	6.9354	1.1647	5.7655
TCGA_HT_7879_01	7.3529	4.7652	4.7827	4.7114	2.7304	4.1357	7.612	0	3.6559
TCGA_HT_7880_01	9.477	7.5991	7.6225	5.9373	2.6031	3.1589	7.6318	2.6766	6.7622
TCGA_HT_7881_01	8.973	5.8211	7.7438	5.0518	3.6454	0.7461	7.4006	3.079	4.8464
TCGA_HT_7882_01	11.4423	11.309	8.7074	10.0001	6.5482	0	14.9956	3.0477	8.5426
TCGA_HT_7884_01	8.3705	4.8951	5.4877	5.2844	1.8402	2.1104	6.3914	0.4528	3.3528
TCGA_HT_7902_01	9.9365	7.3117	6.6014	7.0927	3.8805	1.3174	7.984	1.6272	3.3152
TCGA_HT_8010_01	9.6563	6.5905	7.3914	5.6427	3.3133	2.1395	7.2166	2.7081	7.4663
TCGA_HT_8011_01	10.6209	10.2407	9.3122	9.795	5.9112	0	11.1632	0.393	8.1985
TCGA_HT_8012_01	7.7168	4.817	6.3004	4.683	1.9307	2.4263	6.5226	0.3923	3.375
TCGA_HT_8013_01	8.8507	6.0214	4.6858	7.7555	3.3719	4.8151	8.4625	1.1419	3.7079
TCGA_HT_8015_01	9.7108	9.2745	8.2769	10.5151	9.4086	0.5297	11.4835	3.5956	7.91
TCGA_HT_8018_01	9.5684	8.9859	7.9316	8.1892	5.5033	0.9639	12.0907	2.6016	6.446
TCGA_HT_8019_01	9.2343	7.1508	8.4321	5.7936	1.1932	0	8.0648	3.0515	7.3573
TCGA_HT_8104_01	10.2567	10.9068	10.0754	11.6211	8.3001	1.3018	11.0168	3.0578	9.0594
TCGA_HT_8105_01	7.6837	6.4129	6.7044	8.1724	4.3276	1.5722	8.5583	1.4031	5.0403
TCGA_HT_8106_01	9.1731	8.644	6.0875	10.2258	9.0026	0.7313	10.5751	4.1021	7.6273
TCGA_HT_8107_01	8.727	6.8775	7.5263	6.3008	3.8571	0	7.7444	2.9852	8.3887
TCGA_HT_8108_01	6.999	5.7985	4.3813	5.02	1.6987	3.9635	7.0282	0	3.8925
TCGA_HT_8109_01	7.9497	5.7457	6.4918	6.862	2.3445	1.6893	7.3816	0.8004	5.4105
TCGA_HT_8110_01	10.4275	9.2567	9.0935	9.6692	7.4455	0.8129	10.679	3.6702	8.4831
TCGA_HT_8111_01	8.9179	7.1253	5.6584	8.1934	4.08	1.6423	6.5161	2.735	4.9403
TCGA_HT_8113_01	8.5502	5.5411	7.9307	5.3956	2.3277	0	6.8939	1.8797	5.9483
TCGA_HT_8114_01	8.0119	6.4381	4.7886	5.7058	4.1249	2.9908	10.1705	0.3005	5.5143
TCGA_HT_8558_01	8.5222	6.0251	7.4449	4.785	2.3926	0.4375	7.4653	2.812	6.6467
TCGA_HT_8563_01	7.6998	7.493	4.7407	9.6356	6.525	0	9.112	2.133	7.3385
TCGA_HT_8564_01	8.7201	7.9112	8.3028	6.8652	3.7295	0.8018	10.7502	1.6915	9.4437
TCGA_HT_A4DS_01	11.5733	11.9405	9.3842	12.3928	6.1025	0.77	13.0421	4.683	9.2636
TCGA_HT_A4DV_01	8.4603	6.7032	6.2517	6.4094	2.3219	2.5361	8.0056	2.0704	3.8679
TCGA_HT_A5R5_01	8.7341	8.1059	6.5682	7.6555	4.7908	1.3444	9.2934	3.8927	4.495
TCGA_HT_A5R7_01	8.4786	7.0774	7.1666	6.242	3.3358	1.5435	7.0619	2.6476	5.7964
TCGA_HT_A5R9_01	7.8706	6.8403	6.1004	5.9295	1.7021	2.87	9.008	0.5368	3.3876
TCGA_HT_A5RA_01	11.3058	10.6706	9.8712	10.807	6.8459	0	12.4257	0	7.9394
TCGA_HT_A5RB_01	7.8937	4.2643	6.0694	4.0304	0.97	3.4043	6.804	0	4.6695
TCGA_HT_A5RC_01	11.5735	10.9873	8.6985	12.12	7.5441	0	12.3384	3.1112	10.0295
TCGA_HT_A614_01	8.164	6.2775	6.3483	6.6299	1.7819	3.6109	7.4238	2.1422	2.6702
TCGA_HT_A615_01	8.2109	6.1498	6.0609	6.7481	3.687	3.0378	7.2239	0.8864	3.5887
TCGA_HT_A616_01	8.8008	6.1545	6.8989	4.3393	0.5667	3.534	7.5144	1.9584	4.8042
TCGA_HT_A617_01	10.5794	10.6195	8.9103	10.8783	6.8857	1.2948	12.851	1.9661	10.4268
TCGA_HT_A618_01	9.9235	8.8523	7.5201	8.7631	5.5361	1.5418	8.3675	1.9514	6.2843
TCGA_HT_A619_01	7.2414	4.448	4.4776	4.6436	4.9903	3.8206	8.6303	0	5.8134
TCGA_HT_A61A_01	8.9907	6.5974	8.2035	4.5097	2.959	2.2845	8.6794	3.1283	6.3545
TCGA_HT_A61B_01	8.552	6.7432	4.5083	8.213	2.3209	2.1866	9.7381	0.5301	5.8203
TCGA_HT_A61C_01	11.0672	9.7263	9.0136	9.4891	7.5693	0	12.7374	5.1202	7.6477
TCGA_HT_A74H_01	11.1171	10.8097	9.1092	8.8855	8.1933	0.587	11.0578	4.2911	4.8386
TCGA_HT_A74J_01	8.3117	5.7259	5.9942	8.5199	6.3637	3.7601	7.672	2.0104	4.6817
TCGA_HT_A74K_01	9.535	8.4628	5.7103	8.8107	4.6555	4.1794	11.5796	2.6583	5.2551
TCGA_HT_A74L_01	8.5783	2.777	5.0605	3.9183	3.6677	2.2595	5.8959	0	2.6242
TCGA_HT_A74O_01	8.0641	7.1249	5.4752	7.8053	4.4611	2.7515	8.9192	0.9677	3.1119
TCGA_HW_7486_01	7.8928	5.645	5.9816	6.0451	2.9546	2.2954	7.3333	0	2.6623
TCGA_HW_7487_01	8.1664	5.1424	7.034	7.7725	2.3403	1.4887	7.0439	0.9284	5.105
TCGA_HW_7489_01	8.5303	6.7581	7.0244	6.874	2.4664	2.1641	7.5783	2.6376	5.0908
TCGA_HW_7490_01	8.607	5.9183	5.4602	8.2711	2.7877	2.5997	8.8346	0.8825	2.7877
TCGA_HW_7491_01	6.9435	3.2341	2.7654	2.4195	2.1634	1.9634	7.3926	0	3.9269
TCGA_HW_7493_01	9.0419	7.0875	6.7298	5.6887	2.958	1.5807	8.2911	2.3169	5.0556
TCGA_HW_7495_01	8.0032	5.2418	6.3704	5.2418	1.8821	0.8217	6.6659	1.8821	4.6757
TCGA_HW_8319_01	9.0298	5.7256	5.7342	6.486	3.1039	2.2626	6.5605	2.2626	4.0997
TCGA_HW_8320_01	5.9678	3.6493	4.2092	6.1776	1.6321	3.0615	6.7228	0	3.2851
TCGA_HW_8321_01	7.2277	5.4609	5.7042	6.3388	5.2191	3.1322	7.131	1.3886	4.6779
TCGA_HW_8322_01	7.6431	5.295	4.1651	6.4212	0.9078	2.262	7.0266	0	3.822
TCGA_HW_A5KJ_01	8.5467	7.2542	6.7064	7.7302	3.4522	0.996	9.3584	0.5824	3.5777
TCGA_HW_A5KK_01	10.4085	10.9262	8.984	12.5671	7.5072	0	11.4958	4.5865	8.4363
TCGA_HW_A5KL_01	7.0229	2.9157	5.0354	5.8474	1.7389	3.9095	6.372	0	3.1617
TCGA_HW_A5KM_01	6.2445	5.9978	3.0844	7.084	2.5821	3.4922	8.5133	0.6362	4.4451
TCGA_IK_7675_01	9.3027	4.2553	6.5254	5.1921	3.1598	3.3957	6.8767	0	2.7473
TCGA_IK_8125_01	7.8242	5.9352	6.3223	6.3715	1.3467	2.3256	7.4871	1.1601	5.9058
TCGA_KT_A74X_01	6.932	6.6808	4.2755	5.9235	1.2839	1.4446	8.1335	1.7207	4.6166
TCGA_KT_A7W1_01	10.7919	10.8143	9.3108	11.6617	5.4412	0	12.2746	3.1534	9.3257
TCGA_P5_A5ET_01	7.8667	4.2617	7.1184	3.4438	0.8404	2.0573	6.4126	0.4806	3.6846
TCGA_P5_A5EU_01	10.7469	8.0984	8.8809	8.2237	4.4154	1.7048	9.9437	1.0908	6.6393
TCGA_P5_A5EV_01	7.8434	4.6757	5.018	5.5009	0.4881	4.7638	6.6788	0	4.5573
TCGA_P5_A5EW_01	9.0602	3.9913	4.4936	6.1063	0.8703	3.2771	4.9835	0	2.2406
TCGA_P5_A5EX_01	10.7547	8.8581	5.6055	12.5255	6.5977	0.9662	11.3326	1.949	6.6466
TCGA_P5_A5EY_01	10.8991	9.1245	8.4987	9.6989	5.81	0.5947	10.653	2.4833	9.9465
TCGA_P5_A5EZ_01	7.8412	6.9029	5.7967	6.97	3.7883	4.2863	8.2561	0	4.7856
TCGA_P5_A5F0_01	8.2117	5.1245	7.0544	5.0279	0.9287	2.0574	6.937	1.7044	5.4115
TCGA_P5_A5F1_01	9.0296	6.6247	6.2361	7.153	3.0768	2.4496	7.9596	0.5809	4.6323
TCGA_P5_A5F2_01	7.4595	5.0949	6.7122	6.2571	1.5475	2.2769	8.2198	0.972	4.8281
TCGA_P5_A5F4_01	9.0396	6.4509	7.249	4.1571	2.5866	2.9686	7.7447	2.0656	5.8325
TCGA_P5_A5F6_01	11.5207	9.6578	6.9352	10.3034	4.7531	0	12.2266	0.6816	7.9506
TCGA_P5_A72U_01	11.7342	11.0105	9.2269	9.7463	7.6875	0	12.704	2.7103	10.7314
TCGA_P5_A72W_01	7.0404	4.6613	3.6016	7.4978	3.4088	3.5401	6.6104	0.591	2.6001
TCGA_P5_A72X_01	8.8041	6.8047	6.8932	7.26	3.7792	2.8337	8.8357	0	4.9622
TCGA_P5_A72Z_01	6.969	3.9822	2.9148	5.0601	1.9085	1.7697	8.1161	0	3.3148
TCGA_P5_A730_01	9.2635	5.6425	5.5431	8.1892	2.5243	2.2637	8.1986	0	3.3931
TCGA_P5_A731_01	9.5392	7.9961	7.8266	7.7277	6.2003	1.2183	11.8082	2.1822	5.9653
TCGA_P5_A733_01	8.705	7.2566	6.7565	7.3283	4.0515	1.7801	8.3563	0.981	5.0714
TCGA_P5_A735_01	6.9197	2.9807	5.1485	4.3189	1.4454	3.9943	5.5176	0	2.6253
TCGA_P5_A736_01	8.1008	7.6895	6.8536	8.7337	5.8449	2.581	9.161	3.0353	3.7798
TCGA_P5_A737_01	7.0785	6.003	4.7884	6.2473	0	3.3745	9.0069	0	2.3062
TCGA_P5_A77W_01	6.9979	5.5035	4.7502	4.0957	0.4778	4.1285	6.5733	0	3.7617
TCGA_P5_A77X_01	7.6705	5.7447	6.005	5.4672	0.4935	1.6038	6.7144	0.4935	4.114
TCGA_P5_A780_01	7.7735	7.1328	5.8479	8.1257	5.4953	3.0732	8.3851	2.7771	3.9848
TCGA_P5_A781_01	9.2158	4.6384	5.9585	5.8812	0.8563	1.39	6.6242	1.5974	3.052
TCGA_QH_A65R_01	7.9975	6.3178	6.2408	6.8508	3.0811	4.2026	8.5837	1.1659	3.4529
TCGA_QH_A65S_01	10.1202	6.2761	6.0549	6.9895	1.5039	3.5869	7.5041	2.224	2.0215
TCGA_QH_A65V_01	8.5388	5.8115	5.6585	5.1774	2.8443	1.2789	7.8733	0.5612	3.3269
TCGA_QH_A65X_01	9.6171	6.6308	5.7541	7.6427	3.9789	2.5228	10.7145	0	4.6887
TCGA_QH_A65Z_01	7.1477	5.6047	5.0216	5.4401	1.209	0.9065	6.4086	0.5234	4.4871
TCGA_QH_A6CS_01	9.7331	9.4755	8.9186	9.3057	7.0835	0	10.4404	2.3447	10.6768
TCGA_QH_A6CU_01	10.0754	7.8297	6.9923	6.3323	6.3619	1.0793	7.9351	2.587	2.1173
TCGA_QH_A6CV_01	10.4195	11.1909	9.6592	11.8958	2.6878	0.4738	11.912	0.4738	10.0489
TCGA_QH_A6CW_01	6.8807	5.4592	3.9225	6.3474	2.7146	4.3734	7.274	0	3.9225
TCGA_QH_A6CX_01	11.3815	11.8072	9.149	12.1361	6.1597	0	12.0829	3.3938	8.2356
TCGA_QH_A6CY_01	7.9489	5.9084	6.6696	5.4696	2.3038	0.8379	7.0499	1.3646	4.5988
TCGA_QH_A6CZ_01	6.687	3.7394	5.6898	5.8176	0	2.1976	5.9904	0.8457	4.8329
TCGA_QH_A6X3_01	6.5812	4.908	4.4254	5.7755	1.1893	2.3973	5.955	0	3.491
TCGA_QH_A6X4_01	7.414	4.6752	4.6432	5.2265	2.0246	3.051	5.9629	0	3.3513
TCGA_QH_A6X5_01	8.6137	5.3142	5.8456	4.7978	2.4086	2.4086	6.857	0.5644	1.2848
TCGA_QH_A6X8_01	7.8707	6.0726	5.8121	6.4971	1.7579	0.8432	7.4601	1.5778	4.1436
TCGA_QH_A6X9_01	7.7417	5.47	5.8339	4.746	1.759	3.1617	6.8008	0.4828	3.7356
TCGA_QH_A6XA_01	8.0219	4.7225	5.0481	5.7073	1.4764	3.4335	6.6493	0	2.0424
TCGA_QH_A6XC_01	10.3039	10.5263	9.9631	11.1339	6.34	0	11.4466	4.4776	9.11
TCGA_QH_A86X_01	7.7471	5.4204	5.7597	5.7889	1.0758	1.8044	6.459	0	4.8705
TCGA_QH_A870_01	8.6315	4.2526	5.8863	5.1077	0.5266	2.3117	5.7862	0.5266	3.7371
TCGA_R8_A6MK_01	9.3297	5.9647	5.5264	4.8546	2.1989	2.4302	6.6775	0.4844	5.889
TCGA_R8_A6ML_01	7.8079	6.4099	4.5428	6.8566	2.9435	2.4494	7.8939	0.8021	3.5586
TCGA_R8_A6MO_01	8.0041	6.9925	6.0242	7.1496	3.7561	3.0034	8.5733	0.6873	3.5078
TCGA_R8_A6YH_01	9.4162	3.3524	3.9468	6.0508	2.072	5.481	6.4648	0.849	3.3524
TCGA_R8_A73M_01	8.1556	3.9725	5.3092	5.7785	0	3.1079	7.0817	0.627	2.6879
TCGA_RY_A83X_01	7.3291	4.7531	4.889	5.4245	1.2214	3.3676	7.1309	0	2.8729
TCGA_RY_A83Y_01	7.7721	6.6723	5.1439	4.8635	1.624	2.2153	7.8652	1.0293	3.445
TCGA_RY_A83Z_01	7.3226	6.234	4.7055	7.286	2.7049	3.0046	7.8254	1.8111	2.3261
TCGA_RY_A840_01	6.0833	3.7577	2.7752	5.2852	0.8759	3.3485	6.4975	0	3.1592
TCGA_RY_A843_01	7.2508	4.9698	5.3954	5.6483	1.7243	3.0525	6.8748	0.4688	7.9153
TCGA_RY_A845_01	7.0551	4.4736	4.9638	3.6447	0.7817	3.3205	6.2441	0	4.7297
TCGA_RY_A847_01	7.847	5.5922	5.9695	5.3498	1.5797	3.6931	7.3541	1.3172	3.8995
TCGA_S9_A6TS_01	8.0189	5.8659	6.4803	8.1612	1.2159	2.3128	8.0384	0.9121	3.9589
TCGA_S9_A6TU_01	7.674	4.54	5.6101	6.0525	1.942	3.7856	7.3572	0	2.7408
TCGA_S9_A6TV_01	7.4623	8.1614	2.4484	9.1864	7.2449	1.1301	10.4183	1.4767	5.3514
TCGA_S9_A6TW_01	8.3039	5.9413	5.9642	6.5679	6.084	1.5684	9.3426	0	6.499
TCGA_S9_A6TX_01	7.8811	4.7881	5.4464	5.8463	1.9515	2.4611	6.9483	0	4.4252
TCGA_S9_A6TY_01	7.9774	4.4936	5.8239	7.2906	1.1496	2.0873	6.8523	1.5997	4.5447
TCGA_S9_A6TZ_01	7.3742	5.9224	4.6386	7.7512	2.9822	1.6863	7.8745	0.5782	3.4078
TCGA_S9_A6U0_01	11.3452	11.0752	9.2368	10.9012	8.9829	0.6352	12.4775	5.3117	8.1977
TCGA_S9_A6U1_01	8.9646	4.3596	6.3347	6.061	1.3753	4.0826	6.5768	0	4.181
TCGA_S9_A6U2_01	8.918	5.9107	6.3311	4.5091	0.9609	2.1086	7.686	1.5326	2.9309
TCGA_S9_A6U5_01	8.0414	7.7785	5.1538	6.0254	2.3839	1.8203	7.875	0.8828	4.5461
TCGA_S9_A6U6_01	8.1871	5.6188	5.9905	5.6422	0.4867	4.5276	7.0019	0.8498	4.125
TCGA_S9_A6U8_01	8.3466	4.9201	5.3188	5.4065	2.0749	3.2583	6.9226	0	3.1464
TCGA_S9_A6U9_01	7.8236	6.2605	5.4251	5.7933	4.1593	3.9503	8.5963	0.5674	1.7696
TCGA_S9_A6UA_01	11.5593	9.8698	8.577	11.1153	7.0733	0.7812	13.8617	4.4725	7.2369
TCGA_S9_A6UB_01	6.9906	3.147	4.5932	4.855	0.9054	3.147	5.5362	0	2.0201
TCGA_S9_A6WD_01	8.816	5.0987	5.9962	6.6075	2.464	4.5599	6.243	1.6104	4.1233
TCGA_S9_A6WE_01	6.3719	4.6851	5.3259	4.0254	2.3351	1.8865	6.5962	0.9253	3.3841
TCGA_S9_A6WG_01	9.6894	8.7073	7.1293	6.2965	3.6202	3.2988	13.0345	0	4.6192
TCGA_S9_A6WH_01	7.0358	5.2942	5.0684	5.2557	3.6285	3.2122	6.5064	0	5.3317
TCGA_S9_A6WI_01	8.8513	6.4814	8.0076	5.2297	1.7802	1.2578	7.6309	2.9276	5.4637
TCGA_S9_A6WL_01	8.97	7.1871	7.0806	8.333	5.8755	3.815	9.9143	2.0552	5.6864
TCGA_S9_A6WM_01	10.402	10.6872	9.7868	11.5208	6.1612	0	11.8011	0	8.2466
TCGA_S9_A6WN_01	7.4039	7.0038	5.8987	12.2666	7.4636	0	9.1632	1.5399	7.7714
TCGA_S9_A6WO_01	7.8456	4.0349	4.8572	5.1504	1.7364	4.489	5.5017	0	2.0925
TCGA_S9_A6WP_01	9.909	7.5935	6.3471	7.4659	2.3721	3.7206	8.4446	1.781	4.8328
TCGA_S9_A6WQ_01	8.5715	7.1722	5.7882	6.0965	2.2537	4.7305	7.9252	2.4872	1.8126
TCGA_S9_A7IQ_01	8.7477	5.5841	7.8755	5.2257	0.4227	2.1387	7.1592	2.4396	5.1586
TCGA_S9_A7IS_01	7.5975	7.0466	8.0454	8.401	3.8228	0.9392	10.7862	1.3387	8.641
TCGA_S9_A7IX_01	11.0434	10.2608	9.0879	10.767	6.5187	1.3892	12.0278	4.3755	9.2752
TCGA_S9_A7IY_01	9.1812	6.712	5.6335	5.982	2.9161	3.3055	7.1712	1.265	4.6354
TCGA_S9_A7IZ_01	8.1406	6.02	6.6453	6.8275	6.1928	3.4008	7.5028	0.9025	4.8269
TCGA_S9_A7J0_01	6.0962	5.7387	3.2183	6.5093	3.8498	2.2732	7.072	0.9697	5.7213
TCGA_S9_A7J1_01	7.3214	4.7853	5.0529	5.7034	0.5956	1.83	6.4149	0.5956	6.2599
TCGA_S9_A7J2_01	10.1332	3.0424	6.1672	5.6481	0	2.1469	6.3998	0	3.5908
TCGA_S9_A7J3_01	8.0202	6.1594	5.8641	6.6598	3.0839	2.3298	7.6893	0.3648	4.5684
TCGA_S9_A7QW_01	8.2294	3.6616	6.3217	3.5596	0.8979	3.6115	5.3925	0.5176	4.4971
TCGA_S9_A7QX_01	7.144	4.4712	4.7433	6.3088	1.5068	4.4712	6.9373	0.5464	4.2092
TCGA_S9_A7QY_01	9.0324	6.5293	6.7476	5.8787	3.2299	3.4114	7.8017	0.8783	2.2546
TCGA_S9_A7QZ_01	8.6295	5.7313	6.6795	5.3004	1.5654	2.6076	7.7081	0.4771	4.4954
TCGA_S9_A7R1_01	8.4372	5.9231	6.3009	6.9601	1.0271	1.621	7.864	1.3543	4.0044
TCGA_S9_A7R2_01	10.4583	10.1083	8.6143	8.9015	8.307	3.0487	10.5077	4.0031	6.3488
TCGA_S9_A7R3_01	7.9511	6.1034	5.5441	7.1083	1.9804	2.8841	6.5887	0	4.5598
TCGA_S9_A7R4_01	9.3761	7.872	5.9756	6.6795	2.3758	4.2946	8.6935	0	3.9038
TCGA_S9_A7R7_01	9.6283	7.741	5.2598	10.6022	9.1266	0.6391	9.8752	4.0538	5.0097
TCGA_S9_A7R8_01	7.1148	3.9088	4.3737	7.2878	1.8465	4.1388	6.7751	0	4.2214
TCGA_S9_A89V_01	10.5256	8.6449	9.1942	5.0229	4.7295	0	11.2586	4.1821	8.2334
TCGA_S9_A89Z_01	7.7885	7.0455	4.5829	7.5589	6.6445	4.1495	8.8284	1.2842	5.0259
TCGA_TM_A7C3_01	10.7768	10.1114	9.4413	12.1558	4.1531	0	12.1586	1.2177	9.7812
TCGA_TM_A7C4_01	8.612	7.6121	7.3405	5.3369	2.7739	2.6674	8.9439	2.1396	5.9949
TCGA_TM_A7C5_01	7.0746	4.3242	4.6892	4.4049	0.6569	2.4889	6.932	0.6569	5.1064
TCGA_TM_A7CA_01	7.1829	4.7857	5.4186	3.575	0.963	5.3862	6.2114	0.963	4.0992
TCGA_TM_A7CF_01	8.5325	5.5659	7.1641	6.2068	0	3.7164	7.1132	1.4093	4.2222
TCGA_TM_A7CF_02	8.361	5.082	6.1202	5.8418	1.9327	3.3774	7.2001	0.5554	3.1672
TCGA_TM_A84B_01	9.4499	7.0123	10.1484	6.5659	2.6145	0.3801	10.365	1.7703	9.8647
TCGA_TM_A84C_01	10.6475	11.687	8.0964	12.117	6.0883	0	12.7449	4.3114	8.3099
TCGA_TM_A84F_01	9.9642	7.426	7.7022	8.2048	2.7626	1.6342	8.4909	0.6098	4.685
TCGA_TM_A84G_01	6.8223	3.4399	4.4982	4.204	0	1.7109	6.598	0.4635	3.1631
TCGA_TM_A84H_01	6.4721	4.5977	3.9208	7.291	2.2101	4.5539	5.22	0.7869	4.1444
TCGA_TM_A84I_01	5.864	4.9535	2.4015	6.1197	4.6521	3.0702	6.6538	0	3.7919
TCGA_TM_A84J_01	8.2709	6.143	3.3474	9.0013	6.4489	0.503	11.6352	0.503	5.0857
TCGA_TM_A84L_01	8.0841	5.533	5.716	6.0457	2.1288	4.4411	7.1664	0.9736	3.2005
TCGA_TM_A84M_01	8.489	3.006	3.8318	6.9285	0.4995	4.5448	6.556	0	2.2399
TCGA_TM_A84O_01	9.0949	6.145	7.0076	6.7386	1.7137	2.5888	7.3108	1.4977	5.7024
TCGA_TM_A84Q_01	6.8147	5.1602	4.5603	7.108	3.2237	3.9308	6.9385	1.2572	4.0262
TCGA_TM_A84R_01	8.7037	6.4976	7.3299	6.7332	1.9279	1.1389	7.8766	1.9279	6.2467
TCGA_TM_A84S_01	9.2779	6.1735	5.6428	7.2775	1.8954	2.21	7.2605	1.8954	2.21
TCGA_TM_A84T_01	7.1012	3.8054	4.5958	5.286	0	4.9818	6.4921	0.9465	3.4853
TCGA_TQ_A7RF_01	8.062	6.1938	5.0461	6.1938	0.9279	3.1163	7.008	0.5373	3.0392
TCGA_TQ_A7RG_01	7.3517	5.2251	5.5006	4.9315	1.7906	2.8866	7.3517	2.3032	3.885
TCGA_TQ_A7RH_01	9.9804	5.304	6.4329	6.4007	1.5391	3.1085	6.8924	0	5.1264
TCGA_TQ_A7RI_01	7.9781	4.6066	5.1033	5.2841	2.3707	3.6646	6.7126	0	3.8004
TCGA_TQ_A7RJ_01	7.6323	5.5005	6.1869	5.7544	1.8238	4.1451	6.5806	0.4467	4.1743
TCGA_TQ_A7RK_01	6.657	3.6315	3.9909	6.3893	2.3056	0.908	6.1785	0.5243	1.4609
TCGA_TQ_A7RK_02	7.35595	4.04995	4.7479	5.4075	1.54005	2.1641	6.6323	0	2.75695
TCGA_TQ_A7RM_01	6.1786	4.6814	2.1887	2.3412	1.3365	5.7447	8.9451	0	3.7227
TCGA_TQ_A7RN_01	9.6355	4.1176	5.4103	5.2762	1.1753	4.4438	6.441	0.7042	3.6954
TCGA_TQ_A7RO_01	7.2319	4.6428	5.1267	4.9479	0.5385	1.4906	7.0517	0.5385	4.1491
TCGA_TQ_A7RP_01	11.0686	9.0789	9.8932	10.1204	14.1602	2.4315	10.2806	1.9744	7.6454
TCGA_TQ_A7RQ_01	8.1239	4.366	5.8473	5.0607	1.2066	3.5991	6.208	0.9862	6.136
TCGA_TQ_A7RR_01	7.8791	6.3624	5.7214	4.9909	3.1902	2.1447	7.1942	1.1911	3.7447
TCGA_TQ_A7RS_01	9.8337	3.795	5.3498	2.2596	1.5332	2.4715	6.2837	1.0953	2.6562
TCGA_TQ_A7RU_01	6.9418	4.9718	4.438	3.6797	1.18	2.1294	7.5669	0	3.3621
TCGA_TQ_A7RV_01	7.7826	4.7531	5.3474	4.4086	2.3787	3.9903	7.1371	0	5.3875
TCGA_TQ_A7RV_02	8.8514	6.5293	6.8402	5.2032	4.4054	1.5942	8.7245	2.0104	4.8462
TCGA_TQ_A7RW_01	6.8238	5.4954	4.2888	5.3611	3.9103	4.4297	6.242	0	4.8615
TCGA_TQ_A8XE_01	6.5984	3.6682	3.1783	6.5429	1.8328	4.8489	5.9228	0.45	3.5379
TCGA_TQ_A8XE_02	6.9901	6.1912	3.3857	9.6538	2.0474	3.7997	8.1063	0.8346	6.0449
TCGA_VM_A8C8_01	7.071	6.973	4.2771	5.8738	0	1.6216	6.0872	1.0276	3.5735
TCGA_VM_A8C9_01	11.465	12.2342	8.8537	8.6787	11.1418	0	13.7897	5.9423	6.4102
TCGA_VM_A8CA_01	9.836	8.1677	7.0389	7.6937	3.53	1.4147	10.8149	2.289	8.1367
TCGA_VM_A8CB_01	9.3388	3.6837	4.8797	4.6538	1.2762	2.2606	6.6584	0	4.015
TCGA_VM_A8CD_01	10.875	11.8309	9.006	11.4424	6.2296	0.4252	12.4384	4.2606	10.4585
TCGA_VM_A8CE_01	9.6547	5.9032	5.772	4.9738	1.1382	1.3792	7.3952	0.4857	3.8289
TCGA_VM_A8CF_01	9.2086	9.0428	5.9583	7.7766	4.3672	0.8117	8.5647	0	3.8674
TCGA_VM_A8CH_01	7.3083	5.4719	5.0054	6.9982	1.7475	3.246	7.5561	0	4.7764
TCGA_VV_A829_01	6.3099	4.1479	2.7467	7.1679	3.9336	0.8608	8.8493	0.4936	5.357
TCGA_VV_A86M_01	6.5913	4.237	2.9442	4.0553	4.7371	4.149	7.9938	0	4.5086
TCGA_VW_A7QS_01	7.551	6.0218	3.4107	9.7828	7.313	3.1223	10.5134	0	5.4773
TCGA_VW_A8FI_01	10.5414	10.7742	9.0488	12.0045	5.3124	0	12.299	2.528	9.1277
TCGA_W9_A837_01	8.7079	4.851	6.5896	5.8164	1.0702	2.2221	6.7554	0.7934	4.6758
TCGA_WH_A86K_01	7.4877	5.3242	5.4682	6.5101	2.3804	3.6344	8.2388	0	2.8093
TCGA_WY_A858_01	9.2968	6.6042	6.1122	9.0555	4.2883	4.6043	8.8558	0.6763	5.1081
TCGA_WY_A859_01	7.9994	4.3028	7.1015	5.2536	1.1967	2.2859	6.8297	1.9662	5.0854
TCGA_WY_A85A_01	8.453	5.7349	5.3616	4.5984	0	3.2396	6.839	0	3.8274
TCGA_WY_A85B_01	6.5067	4.0054	3.6574	6.3783	1.656	4.4076	6.8241	0	5.0184
TCGA_WY_A85C_01	7.885	5.4017	5.8012	7.116	3.434	3.729	8.0543	0	4.2151
TCGA_WY_A85D_01	6.9631	4.9348	5.1504	7.4189	1.7931	2.9825	6.0571	0.5783	2.1544
TCGA_WY_A85E_01	9.2855	6.3692	5.5233	6.1331	0	3.0978	7.2321	1.7086	4.9829

## Sheet: Spearman
meth	exp	spearman	P
FBXO17_cg08820801	FBXO17	-0.809	4.75476e-124
EFEMP2_cg06065225	EFEMP2	-0.767	1.21812e-103
EFEMP2_cg02586730	EFEMP2	-0.761	3.59947e-101
FBXO17_cg03724964	FBXO17	-0.749	1.55697e-96
EMP3_cg03208951	EMP3	-0.745	1.01469e-94
EMP3_cg23344780	EMP3	-0.731	1.05145e-89
FBXO17_cg14206172	FBXO17	-0.708	7.68784e-82
EFEMP2_cg02403180	EFEMP2	-0.704	1.72472e-80
EMP3_cg01795122	EMP3	-0.682	1.21842e-73
EFEMP2_cg11944428	EFEMP2	-0.681	2.13527e-73
EMP3_cg02871614	EMP3	-0.633	1.12895e-60
SSTR5_cg06422039	SSTR5	0.593	1.2712e-51
TMEM61_cg20082904	TMEM61	-0.577	2.39528e-48
SSTR5_cg04913730	SSTR5	0.576	2.99942e-48
METTL7B_cg25678745	METTL7B	-0.544	3.95777e-42
TIMP1_cg27151711	TIMP1	-0.538	4.25019e-41
TIMP1_cg16523424	TIMP1	-0.532	5.02007e-40
TIMP1_cg04791822	TIMP1	-0.532	4.30484e-40
EMP3_cg19805953	EMP3	-0.527	3.30411e-39
METTL7B_cg07805981	METTL7B	-0.517	1.60425e-37
TMEM61_cg01189112	TMEM61	-0.516	2.38739e-37
SERPINA5_cg15509705	SERPINA5	-0.496	2.77109e-34
TMEM61_cg08937380	TMEM61	-0.469	2.20427e-30
VAV3_cg06942111	VAV3	-0.456	1.37393e-28
VAV3_cg06710195	VAV3	-0.352	7.0808e-17
