# Supplementary material for: Identification of gene expression and DNA methylation of SERPINA5 and TIMP1 as novel prognostic markers in lower-grade gliomas
Source: PeerJ. 2020 Jun 3;8:e9262. doi: 10.7717/peerj.9262 (PMC7275683; doi:10.7717/peerj.9262)
Supplement: Table S7 [file peerj-08-9262-s008.xlsx]

## Sheet: Rawdata of Figure 2
Sample ID	EMP3	FBXO17	METTL7B	SERPINA5	TIMP1	VAV3	_OS	_OS_IND	_RFS	_RFS_IND
TCGA_CS_4938_01	6.3044	5.0394	6.3197	2.9473	6.2577	2.6902	143	0	143	0
TCGA_CS_4941_01	10.1736	9.2072	9.5922	5.5513	11.0219	10.18	234	1	9	1
TCGA_CS_4942_01	4.7707	4.4889	5.4564	2.459	7.2401	4.2474	1335	1	1184	1
TCGA_CS_4943_01	4.7938	4.3621	5.8017	1.2043	7.1148	3.5153	552	0	552	0
TCGA_CS_4944_01	8.234	9.1899	11.0518	5.352	8.4112	5.9192	323	0
TCGA_CS_5390_01	4.5852	5.7337	5.7631	2.6953	7.1077	3.2324	1966	0	1966	0
TCGA_CS_5393_01	5.3837	5.9239	5.2216	1.9352	7.1188	5.2059	1222	0	1222	0
TCGA_CS_5394_01	3.1746	4.5699	5.5598	1.7407	7.0963	4.7777	3	0
TCGA_CS_5395_01	8.4319	9.989	10.8887	2.2335	10.0949	6.9184	639	1	287	1
TCGA_CS_5396_01	6.0651	3.2146	6.9931	4.6574	8.1285	5.4272	303	0	303	0
TCGA_CS_5397_01	10.9529	9.0274	10.7932	8.9084	11.5684	9.2634	194	1	194	0
TCGA_CS_6186_01	8.9247	9.8179	6.2813	2.5738	9.9738	11.417	538	1	188	1
TCGA_CS_6188_01	11.3434	9.2502	11.9337	7.6691	12.0773	9.1287	725	0	647	1
TCGA_CS_6290_01	6.7186	5.6355	6.0744	4.1893	7.4525	3.5579	546	0	546	0
TCGA_CS_6665_01	8.2938	5.9144	8.1202	7.0238	9.3556	4.3686	378	0	378	0
TCGA_CS_6666_01	6.2687	4.1329	6.2532	3.4498	8.8918	4.4105	258	0	258	0
TCGA_CS_6667_01	4.8927	5.7209	6.8733	3.0776	7.5636	3.54	230	0	230	0
TCGA_CS_6668_01	4.3283	4.3526	4.6358	0.7499	5.9061	3.9045	244	0	244	0
TCGA_CS_6669_01	6.3418	7.2747	4.2289	0.9338	7.5897	7.0454	225	0	225	0
TCGA_CS_6670_01	5.2124	6.6895	6.1929	0.4603	7.637	3.0902	201	0	201	0
TCGA_DB_5270_01	6.6952	6.8137	6.6665	3.5741	8.9334	6.3839	3733	0	3733	0
TCGA_DB_5273_01	6.4394	6.4801	8.8705	3.9927	8.3988	4.0298	2493	0	2493	0
TCGA_DB_5274_01	7.9977	5.149	7.1301	4.4002	11.1013	5.7668	2289	0	2289	0
TCGA_DB_5275_01	5.8576	4.5232	6.2727	1.9997	7.9616	5.1012	1458	0
TCGA_DB_5276_01	6.452	6.4212	6.8304	4.2003	7.875	4.7687	2218	0	2218	0
TCGA_DB_5277_01	6.7696	5.3946	6.8108	1.4621	7.2506	5.3946	1547	1	1156	1
TCGA_DB_5278_01	5.5882	6.8538	5.0273	0.6958	6.7203	3.3642	1526	0	507	1
TCGA_DB_5279_01	6.0249	5.8146	6.4597	2.915	6.9311	4.5388	1354	0	695	1
TCGA_DB_5280_01	4.3681	4.4399	5.4987	0.7671	6.7316	2.647	1112	0	1112	0
TCGA_DB_5281_01	6.1035	6.3211	7.9223	3.7727	8.406	5.8979	2381	0	2381	0
TCGA_DB_A4X9_01	3.7002	4.966	5.269	1.0309	5.8015	2.7523	1412	0	1412	0
TCGA_DB_A4XA_01	6.218	6.1183	7.1756	0.6343	7.6343	3.1261	573	0	573	0
TCGA_DB_A4XB_01	4.7095	8.8423	4.4158	1.3819	5.4182	4.9781	919	0	919	0
TCGA_DB_A4XC_01	5.9455	6.3584	6.074	1.8289	7.6446	4.6213	1421	0	1421	0
TCGA_DB_A4XD_01	4.1087	5.542	4.6101	1.7613	6.3453	3.7472	1210	0	1210	0
TCGA_DB_A4XE_01	5.3008	6.5801	4.8979	1.2462	7.352	5.1417	1139	0	1139	0
TCGA_DB_A4XF_01	6.0549	5.6264	7.1148	5.418	8.0201	4.2138	1021	0	1021	0
TCGA_DB_A4XG_01	3.2713	5.5922	7.0629	0	6.328	4.6323	2219	0	2219	0
TCGA_DB_A4XH_01	6.36	7.2291	6.5923	1.9107	7.6849	3.6543	962	0	962	0
TCGA_DB_A64L_01	6.8002	6.8533	7.8087	3.152	8.2304	4.8732	736	0	724	1
TCGA_DB_A64O_01	9.7402	8.6772	9.8697	6.1579	10.5809	7.74	775	1
TCGA_DB_A64P_01	5.4019	5.1168	8.6825	4.2565	8.0133	3.0287	916	0	916	0
TCGA_DB_A64Q_01	4.3993	4.3421	5.7195	1.1575	6.076	2.2303	182	0	182	0
TCGA_DB_A64R_01	3.8157	5.8622	4.0865	0	6.0427	3.1296	955	0	955	0
TCGA_DB_A64S_01	5.484	5.1463	7.9559	4.147	8.2449	4.4686	835	0	835	0
TCGA_DB_A64U_01	4.4906	5.4707	4.2789	2.2738	6.2943	2.2738	846	0	846	0
TCGA_DB_A64V_01	8.2983	6.1037	8.3218	3.3918	8.7613	3.7568	889	0	889	0
TCGA_DB_A64W_01	5.2924	6.8691	6.2318	2.1866	7.1742	5.5327	438	1	438	0
TCGA_DB_A64X_01	5.9781	5.2976	7.5163	2.1797	7.9432	4.0561	563	0	563	0
TCGA_DB_A75K_01	6.8296	5.5891	8.7507	2.865	10.5121	4.1925	368	0	368	0
TCGA_DB_A75L_01	5.2519	5.9827	6.6373	1.1355	7.3092	4.6403	342	0	342	0
TCGA_DB_A75M_01	4.7686	4.8818	7.4947	2.041	7.1595	2.3235	544	0	544	0
TCGA_DB_A75O_01	6.5313	6.072	8.7881	4.0735	7.5096	3.9142	935	0
TCGA_DB_A75P_01	10.5836	9.3516	13.4222	8.5428	13.1142	9.4104	492	0	492	0
TCGA_DH_5140_01	8.7308	7.6964	8.9927	3.6254	11.644	5.3178	607	1	607	0
TCGA_DH_5141_01	6.6427	6.2379	6.6042	4.004	8.4326	3.6622	968	0	968	0
TCGA_DH_5142_01	7.2385	3.6548	7.6302	4.2292	7.9549	4.7006	922	0	922	0
TCGA_DH_5143_01	5.5542	5.6324	4.8414	1.6975	7.6857	5.2626	438	0	438	0
TCGA_DH_5144_01	4.6302	5.3437	5.4204	0	6.678	3.5957	244	0	244	0
TCGA_DH_A669_01	5.3988	4.5889	7.2166	4.8027	8.811	3.8258	919	1
TCGA_DH_A669_02	6.2682	4.5033	8.4424	3.5413	10.6283	3.4402	919	1
TCGA_DH_A66B_01	6.4633	3.1588	7.8307	3.617	7.749	4.6559	1279	0	1279	0
TCGA_DH_A66D_01	5.1112	4.547	8.2269	2.9899	7.2465	3.7794	846	0	846	0
TCGA_DH_A66F_01	5.4923	5.1128	7.071	3.5124	7.1927	3.7843	523	0	523	0
TCGA_DH_A66G_01	7.3121	6.2528	7.7744	5.1794	8.9881	3.6218	523	0	523	0
TCGA_DH_A7UR_01	6.8522	6.4115	8.6619	3.2163	9.5473	5.4993	1650	0	1650	0
TCGA_DH_A7US_01	5.6621	5.1251	4.8703	1.5935	6.7914	3.4175	399	0	399	0
TCGA_DH_A7UT_01	8.8171	5.432	7.9422	3.715	7.683	1.9592	407	0	404	1
TCGA_DH_A7UU_01	4.5338	5.2457	5.3722	3.5686	6.5941	2.1624	105	0	105	0
TCGA_DH_A7UV_01	4.9234	4.8867	6.4196	0.4658	6.4132	3.3961	566	0	566	0
TCGA_DU_5847_01	11.4184	9.3561	11.1292	4.5891	11.5453	9.534	548	0	548	0
TCGA_DU_5849_01	6.9209	7.0019	7.3899	2.3089	7.8346	5.2174	443	0	443	0
TCGA_DU_5851_01	6.9401	7.0854	7.0617	4.5815	7.9696	5.8834	531	0	531	0
TCGA_DU_5852_01	10.0801	9.6316	9.8114	5.8719	11.7563	10.2339	205	1	24	1
TCGA_DU_5853_01	6.1671	5.2468	6.3416	1.5487	8.0819	4.2555	407	0	407	0
TCGA_DU_5854_01	10.5613	9.2303	12.1892	7.3743	11.7928	9.4748	257	0	202	1
TCGA_DU_5855_01	6.8489	5.2593	9.6474	2.0186	7.9215	3.8643	207	0	207	0
TCGA_DU_5870_01	5.4194	5.6032	5.4316	2.0945	6.99	4.4646	5546	0	4347	1
TCGA_DU_5870_02	5.425	4.6036	5.3445	4.3796	7.9412	4.5567	5546	0	4347	1
TCGA_DU_5871_01	8.1726	5.6874	8.3511	2.4085	7.5655	3.2058	576	0	576	0
TCGA_DU_5872_01	6.0343	6.2337	6.4438	5.5802	8.2376	4.4475	532	0	265	1
TCGA_DU_5872_02	10.4032	6.5252	10.127	6.4033	13.4811	7.1462	532	0	265	1
TCGA_DU_5874_01	5.2797	5.0197	6.9457	2.7074	8.1687	3.9594	461	0	461	0
TCGA_DU_6392_01	7.9575	7.8449	8.3643	8.8279	11.9391	7.6338	6423	0	950	1
TCGA_DU_6393_01	4.4027	3.8515	5.9892	2.2856	6.723	5.1336	1585	1
TCGA_DU_6394_01	5.3911	3.6586	13.2582	4.9602	8.7121	7.3581	682	1	353	1
TCGA_DU_6395_01	5.182	4.5891	6.7957	0.4324	7.134	2.6422	1491	1	1197	1
TCGA_DU_6396_01	6.0108	2.9415	6.2128	5.1732	7.9062	4.7933	2286	1	106	1
TCGA_DU_6397_01	5.3937	5.7471	5.7672	4.5601	7.2655	4.5369	1401	1	837	1
TCGA_DU_6397_02	5.7559	5.1173	6.0677	6.3716	10.5971	5.6566	1401	1	837	1
TCGA_DU_6399_01	4.725	4.9911	5.2667	2.5903	7.8767	1.7414	2000	1	1629	1
TCGA_DU_6400_01	5.7361	5.7942	5.0931	2.6952	8.7576	4.8269	37	1	37	0
TCGA_DU_6401_01	5.4369	5.6353	6.2261	4.0505	8.4393	2.805	2660	1	1886	1
TCGA_DU_6402_01	11.0927	9.8749	13.0883	5.8201	15.0756	9.1839	214	1	103	1
TCGA_DU_6403_01	9.0445	9.163	9.0145	8.9617	10.9491	7.2843	354	1
TCGA_DU_6404_01	9.5368	8.5425	5.9725	4.7213	10.9505	8.0378	4068	1	1154	1
TCGA_DU_6404_02	9.17435	4.7883	4.033	3.1009	10.4449	7.19645	4068	1	1154	1
TCGA_DU_6405_01	11.0996	9.5666	11.7561	6.5425	11.2373	9.7357	605	1	486	1
TCGA_DU_6406_01	10.9548	10.1361	11.1604	5.6305	12.0587	9.3999	512	1
TCGA_DU_6407_01	4.3667	5.1196	6.0737	1.7466	6.7468	2.8643	2875	1	2397	1
TCGA_DU_6407_02	7.53235	5.0124	8.59815	4.1633	9.7885	6.6115	2875	1	2397	1
TCGA_DU_6408_01	5.2378	4.9913	7.8803	2.617	7.4165	4.319	3470	1	2097	1
TCGA_DU_6410_01	3.2122	4.2869	6.172	3.4491	8.0458	4.335	242	0	242	0
TCGA_DU_6542_01	5.7035	4.4547	7.3071	3.414	7.2548	6.2064	235	0
TCGA_DU_7006_01	10.9319	9.1274	12.2104	9.2663	13.4822	9.0592	349	1
TCGA_DU_7007_01	8.1824	4.497	9.4107	5.704	8.9436	5.9716	1915	1	1915	0
TCGA_DU_7008_01	4.9338	5.482	4.6629	0.8358	6.96	4.6924	4752	0	330	1
TCGA_DU_7009_01	4.3597	5.6081	6.3332	2.3804	6.0357	4.4418	4206	0	2960	1
TCGA_DU_7010_01	7.4652	5.3815	6.3746	6.0466	8.8236	4.9883	456	1	193	1
TCGA_DU_7011_01	7.1125	7.2292	7.2074	2.559	9.0141	5.6526	3200	1
TCGA_DU_7012_01	10.7706	8.4893	9.8506	6.629	12.3012	7.4812	199	1	199	0
TCGA_DU_7013_01	8.966	8.9264	11.3175	6.6487	11.1679	9.7271	269	1	187	1
TCGA_DU_7014_01	6.7881	5.9409	8.1737	4.8538	8.4989	2.835	3571	1	3437	1
TCGA_DU_7015_01	5.3877	4.3184	6.2006	2.1869	6.6595	4.1361	2761	0	591	1
TCGA_DU_7018_01	5.3995	5.3473	5.4415	2.8061	7.6763	3.8316	933	1	338	1
TCGA_DU_7019_01	6.542	6.8556	8.1575	2.7349	8.7581	4.9046	800	0	800	0
TCGA_DU_7290_01	10.7358	8.1387	9.9776	9.1696	11.3617	6.3732	315	1
TCGA_DU_7292_01	10.3937	9.195	10.7347	5.1365	10.5519	8.4223	242	1	91	1
TCGA_DU_7294_01	4.7628	5.4343	5.542	0.4171	6.7132	2.8815	2869	0	2869	0
TCGA_DU_7298_01	6.1552	6.1072	8.249	5.7566	8.2183	6.0825	576	1	200	1
TCGA_DU_7299_01	5.2357	4.4518	8.1552	1.3821	6.442	6.4331	1339	1	675	1
TCGA_DU_7300_01	8.034	7.4408	8.023	3.493	8.7851	5.0196	1886	1	317	1
TCGA_DU_7301_01	6.3177	4.328	7.3368	2.4623	7.5942	4.0842	788	1	366	1
TCGA_DU_7302_01	5.5017	6.3415	7.225	2.8349	7.1917	4.5118	1834	0	1374	1
TCGA_DU_7304_01	6.4547	6.5554	6.8032	2.0609	7.4696	5.7795	709	1	309	1
TCGA_DU_7304_02	7.2918	4.6411	7.1919	2.8049	9.0846	2.4571	709	1	309	1
TCGA_DU_7306_01	4.5358	4.4123	7.3063	4.4123	6.7865	3.394	1277	0	1250	1
TCGA_DU_7309_01	5.4399	6.7698	5.7573	1.557	7.5101	4.7838	84	0	84	0
TCGA_DU_8158_01	10.5073	9.162	11.8011	7.7006	11.5311	6.7149	155	1
TCGA_DU_8161_01	9.4756	8.7391	10.2748	3.1488	10.6725	10.5179	722	1	111	1
TCGA_DU_8162_01	8.5676	8.416	7.8649	6.7653	10.0404	9.0062	444	1	402	1
TCGA_DU_8163_01	4.6428	4.8803	6.9654	1.1502	6.3266	3.3136	629	0	509	1
TCGA_DU_8164_01	4.5938	5.813	5.4393	0.877	6.4458	4.4539	651	0	651	0
TCGA_DU_8165_01	9.2273	8.1524	7.0769	3.9321	11.2003	6.6827	582	0	582	0
TCGA_DU_8166_01	6.0174	5.166	4.4763	0.7089	7.4423	4.1806	516	0	193	1
TCGA_DU_8167_01	8.2796	5.5243	6.6228	3.4044	7.6931	3.5655	471	0	471	0
TCGA_DU_8168_01	5.3855	5.4488	6.6866	3.5005	7.0907	4.9766	431	0	431	0
TCGA_DU_A5TP_01	7.9039	7.6997	8.7741	2.7543	10.4521	6.9075	433	0
TCGA_DU_A5TR_01	8.8506	5.3148	7.9842	6.8957	9.5061	4.3506	383	0	383	0
TCGA_DU_A5TS_01	5.6072	6.0867	6.3616	1.1636	7.1282	3.2751	460	0	460	0
TCGA_DU_A5TT_01	10.8453	8.5409	10.2612	6.0398	11.5985	7.6602	151	0	151	0
TCGA_DU_A5TU_01	8.4691	5.5455	9.1649	5.1579	11.3312	5.8507	111	0
TCGA_DU_A5TW_01	3.1636	3.9215	6.0828	2.439	5.9955	2.439	172	0	172	0
TCGA_DU_A5TY_01	10.9708	9.0202	10.2012	6.8982	11.6914	8.9845	371	0	371	0
TCGA_DU_A6S2_01	5.5365	6.6544	6.6544	2.6651	7.5682	4.7926	263	0	263	0
TCGA_DU_A6S3_01	5.6308	6.5092	5.2302	1.3228	7.2776	4.3233	82	0	82	0
TCGA_DU_A6S6_01	4.87	6.7895	5.5823	0	6.1279	4.1501	2372	0
TCGA_DU_A6S7_01	2.8848	5.7493	4.7533	0	6.4072	3.0422	220	0	220	0
TCGA_DU_A6S8_01	5.78	5.1734	5.2912	2.7445	8.3889	3.5807	182	0	182	0
TCGA_DU_A76K_01	9.8819	10.1834	7.2692	3.3753	10.1917	7.5977	347	1
TCGA_DU_A76L_01	10.0275	8.4248	9.1156	7.1351	13.907	8.304	814	1
TCGA_DU_A76O_01	5.5833	4.3779	5.483	1.5064	8.0633	4.4094	217	0	217	0
TCGA_DU_A76R_01	7.3789	5.8841	6.6198	7.6221	9.5066	5.8408	648	1
TCGA_DU_A7T6_01	7.4674	5.0348	5.429	6.108	10.3288	5.0348	547	1
TCGA_DU_A7T8_01	7.0951	4.8073	5.2372	4.521	11.8434	4.8073	3787	0
TCGA_DU_A7TA_01	4.9285	3.2262	5.4975	2.196	8.0448	5.3221	2369	0	2369	0
TCGA_DU_A7TB_01	7.0543	8.5398	6.6546	3.8084	10.1978	6.1373	1287	0
TCGA_DU_A7TC_01	5.31	6.6129	5.716	3.0056	7.2569	3.9498	715	0	715	0
TCGA_DU_A7TD_01	9.7727	9.2262	10.9934	7.1536	11.3902	8.6503	228	1
TCGA_DU_A7TG_01	7.4046	8.1269	5.7369	2.5622	8.8488	6.1451	1351	1
TCGA_DU_A7TI_01	6.7856	5.4832	6.3558	0.9066	7.0224	3.7742
TCGA_DU_A7TJ_01	10.8385	10.0097	11.6085	5.6071	11.7572	9.9849	17	0
TCGA_E1_5302_01	9.5158	7.3917	7.3264	6.3562	8.3619	5.6057	1525	1	1242	1
TCGA_E1_5303_01	6.3171	5.0808	7.2588	3.7611	7.4016	3.3473	2052	1	156	1
TCGA_E1_5304_01	3.6965	3.2396	3.9475	1.0396	6.0619	3.616	1251	1	903	1
TCGA_E1_5305_01	5.7882	5.5683	8.1097	3.0669	8.591	5.3856	2433	1	1604	1
TCGA_E1_5307_01	4.8567	5.4	5.5322	1.5061	6.1485	3.7167	1762	1	1452	1
TCGA_E1_5311_01	4.7515	5.9927	5.9137	2.3259	7.0636	4.878	4084	1	2602	1
TCGA_E1_5318_01	4.3076	4.3875	3.7041	4.4632	9.2969	6.4634	2379	1	362	1
TCGA_E1_5319_01	8.0046	5.5602	7.8067	5.6894	9.1641	4.8435	2907	1	923	1
TCGA_E1_5322_01	4.9844	3.9505	7.8422	1.9605	6.926	5.3747	3978	1	1085	1
TCGA_E1_A7YD_01	8.7147	9.0183	9.2689	8.6976	10.8407	9.0145
TCGA_E1_A7YE_01	8.5871	4.1777	9.9798	10.4629	7.9919	5.4878
TCGA_E1_A7YH_01	6.0437	5.0817	5.2792	4.1856	6.8488	1.7194
TCGA_E1_A7YI_01	10.2262	4.5338	10.0284	6.4431	11.4618	8.532
TCGA_E1_A7YJ_01	11.0269	9.3179	10.8821	6.6392	12.0891	8.6883
TCGA_E1_A7YK_01	9.3073	6.4998	8.9038	7.7471	9.8806	5.0575
TCGA_E1_A7YL_01	11.2667	9.3967	7.1751	7.1712	12.0414	6.0578
TCGA_E1_A7YM_01	9.1067	8.5314	7.0977	6.7404	10.1747	8.2027
TCGA_E1_A7YN_01	10.6764	8.7308	11.9659	11.7304	12.2725	7.0184
TCGA_E1_A7YO_01	4.8264	6.0318	6.9089	1.4246	8.0996	4.0143	2282	1	1977	1
TCGA_E1_A7YQ_01	10.6606	8.3534	10.3315	6.0966	12.2585	9.2148
TCGA_E1_A7YS_01	3.6643	3.4879	5.953	3.1151	5.6411	3.7451
TCGA_E1_A7YU_01	5.9284	5.774	5.9727	4.5153	6.9831	4.1791
TCGA_E1_A7YV_01	6.4219	6.0099	7.0831	4.2913	9.0847	5.2193	987	1	164	1
TCGA_E1_A7YW_01	6.7369	6.7712	6.6205	1.5047	6.1832	1.9094	1120	1	980	1
TCGA_E1_A7YY_01	7.7402	7.5884	8.9024	1.8757	10.4121	6.8022
TCGA_E1_A7Z2_01	9.1527	9.2579	9.6521	3.594	10.2625	7.7655
TCGA_E1_A7Z3_01	7.9368	7.3759	8.6849	5.5614	9.8314	6.9858
TCGA_E1_A7Z4_01	8.3633	4.4826	7.3193	0.8777	7.2732	2.121
TCGA_E1_A7Z6_01	5.9245	5.6278	6.0007	2.3877	7.8952	2.9232	984	1	872	1
TCGA_EZ_7264_01	4.4206	4.7995	5.2233	0.8789	6.0721	2.8938	436	0	436	0
TCGA_F6_A8O3_01	4.1488	5.1948	5.9228	0.6229	6.2074	4.5153	7	0	7	0
TCGA_F6_A8O4_01	5.1338	6.1799	4.2509	0.4093	7.1797	4.347	6	0	6	0
TCGA_FG_5962_01	6.1721	6.4223	6.2036	4.0492	7.8646	6.4435	787	0	787	0
TCGA_FG_5963_01	9.9362	6.342	8.8447	6.4181	10.9111	5.9026	547	0	395	1
TCGA_FG_5963_02	7.7107	5.1595	7.024	8.2059	12.5571	6.9344	547	0	395	1
TCGA_FG_5964_01	8.5006	7.1935	8.5376	3.8995	9.3499	5.1456	378	0	378	0
TCGA_FG_5965_01	6.7519	6.2378	7.2891	4.0612	8.088	4.1134	979	0	715	1
TCGA_FG_5965_02	7.84435	6.6781	7.6831	4.25395	8.93575	7.5013	979	0	715	1
TCGA_FG_6688_01	10.9546	9.1073	11.2509	8.6489	11.0645	6.1917	221	0	221	0
TCGA_FG_6689_01	6.1822	6.399	6.517	2.2999	6.9763	4.5383	190	0	119	1
TCGA_FG_6690_01	4.8589	3.9849	5.5078	1.161	7.326	2.3562	143	0	143	0
TCGA_FG_6691_01	4.5913	6.3858	5.1561	1.9262	7.1577	3.233	103	0	103	0
TCGA_FG_6692_01	11.6808	10.174	12.6152	6.1167	13.1186	7.9883	413	0	413	0
TCGA_FG_7634_01	5.3932	3.8044	8.1769	4.6164	9.6624	6.752	467	0	467	0
TCGA_FG_7636_01	4.7556	5.1857	7.5854	1.1887	6.8912	3.7406	544	0	544	0
TCGA_FG_7637_01	5.335	5.6319	6.0576	5.0408	8.0178	3.1379	1020	0	1020	0
TCGA_FG_7638_01	5.7524	6.2889	5.8959	1.4513	7.1403	4.4757	686	0	407	1
TCGA_FG_7641_01	4.191	6.4553	5.2972	1.4246	5.9159	3.6287	313	0	313	0
TCGA_FG_7643_01	8.6433	8.7172	8.3498	5.8561	9.6124	9.6016	293	0	254	1
TCGA_FG_8181_01	7.7669	7.5543	6.3067	1.747	9.1066	6.6379	394	0	394	0
TCGA_FG_8182_01	4.2845	5.1668	4.1238	0.7526	5.5403	3.3077	416	0	416	0
TCGA_FG_8185_01	4.8705	4.4222	5.3461	1.6341	7.429	3.2805	433	0	433	0
TCGA_FG_8186_01	6.0393	5.2427	7.6172	3.1576	7.4985	4.2674	487	0	487	0
TCGA_FG_8187_01	5.4655	6.035	5.3664	2.1224	6.6908	2.4886	611	0	611	0
TCGA_FG_8188_01	4.0733	4.7928	4.9627	1.5749	6.7533	1.5749	455	0	384	1
TCGA_FG_8189_01	5.8466	8.214	4.4578	2.5888	6.8455	6.461	685	0	685	0
TCGA_FG_8191_01	6.4928	4.6642	7.6295	2.6899	7.8179	2.5174	472	0	472	0
TCGA_FG_A4MT_01	4.224	4.1191	6.2167	1.8561	7.7628	5.7739	1164	0	499	1
TCGA_FG_A4MT_02	6.8836	6.6337	5.8528	4.2742	9.2568	6.3467	1164	0	499	1
TCGA_FG_A4MU_01	11.316	9.7135	11.6946	6.8222	12.3785	8.8542	326	0
TCGA_FG_A4MW_01	10.9055	9.7486	10.7949	6.9785	11.3294	8.2156	559	1	226	1
TCGA_FG_A4MX_01	5.0056	5.4975	6.2152	2.3266	8.4024	3.0051	569	0	569	0
TCGA_FG_A4MY_01	7.5487	6.4609	7.8545	4.1496	8.4149	5.4331	721	0	721	0
TCGA_FG_A60J_01	5.3886	4.5045	8.2556	1.8089	7.4164	3.7568	449	0	449	0
TCGA_FG_A60K_01	4.3258	5.7301	4.1648	0.5093	5.3355	3.6843	542	0	542	0
TCGA_FG_A60L_01	7.3435	5.9791	6.6411	2.037	8.3413	3.2137	499	0	499	0
TCGA_FG_A6IZ_01	5.4374	4.9248	5.6132	0	7.6165	2.1557	457	0	457	0
TCGA_FG_A6J1_01	6.888	6.369	6.5193	1.5927	9.1344	2.3312	500	0	500	0
TCGA_FG_A6J3_01	10.5831	5.4471	9.6004	6.949	11.9928	5.2592	677	0	677	0
TCGA_FG_A70Y_01	5.3499	5.908	7.1296	3.0938	7.1929	3.466	868	0	490	1
TCGA_FG_A70Z_01	9.682	9.0174	9.3043	6.8581	11.8606	8.941	328	0
TCGA_FG_A710_01	6.9453	6.2905	6.4784	1.7902	9.4093	3.4376	1115	0	1115	0
TCGA_FG_A711_01	6.2312	5.7914	5.1015	0	6.8293	4.3433	1329	0	712	1
TCGA_FG_A713_01	6.7367	7.7818	6.6893	1.6581	8.1403	5.4775	159	0	159	0
TCGA_FG_A87N_01	6.8361	9.1576	9.2476	6.0749	9.7702	7.2721	413	0	413	0
TCGA_FG_A87Q_01	10.4165	8.606	10.0249	6.8959	11.0135	8.0956	174	0	174	0
TCGA_FN_7833_01	6.8109	4.2612	7.3788	1.9882	9.0476	3.6437	837	0	837	0
TCGA_HT_7467_01	6.4711	6.4565	6.5605	4.1941	8.0646	6.4466	3	0
TCGA_HT_7468_01	4.5751	4.5945	5.2956	1.5509	6.9186	5.8482	203	0	203	0
TCGA_HT_7469_01	8.7114	7.6461	6.0331	3.2918	8.9768	9.5307	351	1	92	1
TCGA_HT_7470_01	6.1303	6.7412	6.1759	3.3208	7.1365	4.4722	268	0	268	0
TCGA_HT_7471_01	6.9367	5.0708	7.5132	2.5004	9.9281	3.8277	4	0
TCGA_HT_7472_01	5.241	3.6684	6.4039	1.003	6.6255	4.3979	1	0	1	0
TCGA_HT_7473_01	7.5561	5.5482	8.0122	4.9216	7.4177	4.973	503	0	503	0
TCGA_HT_7474_01	6.9193	7.1205	6.8851	4.5248	7.8941	4.9464	114	0	114	0
TCGA_HT_7475_01	6.3726	8.1625	6.429	0.4115	7.3139	6.2277	530	0	530	0
TCGA_HT_7476_01	7.6954	7.0732	5.7933	5.105	11.2536	6.1524	199	0	199	0
TCGA_HT_7477_01	5.4033	7.5724	7.0249	3.5259	8.0339	8.3991	738	0	738	0
TCGA_HT_7478_01	6.9904	5.137	8.0551	3.8413	8.753	4.0343	194	0	194	0
TCGA_HT_7479_01	6.6204	6.405	6.2047	1.8689	6.6909	4.1741	216	0	216	0
TCGA_HT_7480_01	4.6004	5.6243	5.6155	0.3807	6.5317	3.6059	2287	0	1943	1
TCGA_HT_7481_01	6.4879	6.6785	7.3668	2.2756	7.486	5.0395	1800	0	880	1
TCGA_HT_7482_01	6.2939	4.6172	7.4027	2.4742	6.408	4.6393	1826	0	374	1
TCGA_HT_7483_01	5.7899	5.8636	6.5834	1.6659	8.4518	4.6999	5255	0	5255	0
TCGA_HT_7485_01	4.8274	4.6499	6.5169	0.7912	6.0526	2.2179	122	0	122	0
TCGA_HT_7601_01	6.8255	4.7104	8.2218	4.1138	8.6127	4.8411	153	0	153	0
TCGA_HT_7602_01	6.4158	6.8797	6.9158	1.6465	7.0142	3.5427	908	0
TCGA_HT_7603_01	5.6708	7.4867	4.4433	2.7033	7.3557	6.5457	705	0	705	0
TCGA_HT_7604_01	4.0353	3.851	6.575	1.8562	5.5901	3.6772	3725	0	3725	0
TCGA_HT_7605_01	5.4947	6.6488	5.6006	1.5869	6.8591	4.7423	139	0	139	0
TCGA_HT_7606_01	5.3067	3.4016	8.2232	3.3148	9.4022	5.394	526	0	526	0
TCGA_HT_7607_01	7.4238	7.7559	8.0424	4.8213	8.2158	5.8887	96	1	96	0
TCGA_HT_7608_01	5.3827	5.5882	5.8301	4.3048	8.7272	7.2508	671	0	671	0
TCGA_HT_7609_01	4.695	8.1709	7.8171	1.3541	6.4557	4.5588	1399	0	1399	0
TCGA_HT_7610_01	4.0177	6.4208	4.8824	0	5.701	5.0454	1706	0	1205	1
TCGA_HT_7611_01	4.7076	5.8131	6.5414	2.9098	5.7396	2.1417	1752	0	1752	0
TCGA_HT_7616_01	7.9696	5.8197	8.9232	8.4191	10.5976	6.2813	7	1	7	0
TCGA_HT_7620_01	6.0968	6.3692	5.9071	3.825	6.823	2.9726	434	0	280	1
TCGA_HT_7676_01	4.5975	3.9074	5.9778	1.1378	7.0384	2.7229	5	0
TCGA_HT_7677_01	4.7974	5.313	5.8241	1.2968	6.9019	2.3446	494	0	494	0
TCGA_HT_7680_01	10.1662	8.346	8.376	11.4299	10.659	3.9465	23	0	23	0
TCGA_HT_7681_01	5.8446	6.9033	6.6331	2.6634	7.4202	4.51	1359	0	1359	0
TCGA_HT_7684_01	7.3297	4.4627	8.9273	8.3201	9.492	3.5618	184	0	184	0
TCGA_HT_7686_01	7.7548	5.7257	7.767	7.1474	7.745	3.9658	1300	0	1300	0
TCGA_HT_7687_01	6.2648	6.2846	6.3235	3.9579	7.9655	5.3477	3	0
TCGA_HT_7688_01	5.8942	7.3587	6.6777	1.5424	6.8379	6.0921	964	0	964	0
TCGA_HT_7689_01	6.6835	5.8372	6.9687	3.1424	7.2876	3.2495	455	0	455	0
TCGA_HT_7690_01	6.5064	6.8589	6.5019	5.6577	9.2594	5.3328	3	0	3	0
TCGA_HT_7691_01	10.3086	8.2568	8.4433	8.1536	12.1633	7.8504	3	0	3	0
TCGA_HT_7692_01	4.4295	3.8776	8.3653	0.4652	7.6819	3.5892	90	0	90	0
TCGA_HT_7693_01	7.0064	3.448	9.7256	6.6976	8.6114	4.8992	533	0	533	0
TCGA_HT_7694_01	6.2601	7.3295	7.235	3.5266	7.3816	6.2033	210	0	210	0
TCGA_HT_7695_01	4.9749	6.6542	5.032	0.5922	6.3203	5.5908	442	0	442	0
TCGA_HT_7854_01	9.2992	6.6304	10.0994	6.1434	9.5094	6.037	292	0	292	0
TCGA_HT_7855_01	3.6321	4.6153	7.6976	2.8187	6.3799	3.3591	585	0	585	0
TCGA_HT_7856_01	6.419	7.6744	6.8233	4.5515	7.6722	5.7018	1189	0	1189	0
TCGA_HT_7857_01	10.6215	7.3736	11.6724	6.5862	13.4633	8.0857	7	0	7	0
TCGA_HT_7858_01	7.1827	5.3811	7.2785	2.4867	7.453	4.9863	1540	0	1540	0
TCGA_HT_7860_01	10.6684	9.7099	10.0939	4.6722	10.5541	10.254	15	0
TCGA_HT_7873_01	3.2485	3.944	6.9193	2.2009	5.9427	3.2485	298	0	298	0
TCGA_HT_7874_01	6.2364	7.5571	6.03	2.5914	7.1369	6.4395	1130	0	1130	0
TCGA_HT_7875_01	4.9966	5.6035	5.5664	0.9469	6.5027	3.7409	10	0	10	0
TCGA_HT_7877_01	5.0569	6.5034	5.3262	2.5	6.9354	5.7655	4	0	4	0
TCGA_HT_7879_01	4.7652	4.7827	4.7114	2.7304	7.612	3.6559	112	0	112	0
TCGA_HT_7880_01	7.5991	7.6225	5.9373	2.6031	7.6318	6.7622	162	0	162	0
TCGA_HT_7881_01	5.8211	7.7438	5.0518	3.6454	7.4006	4.8464	89	0	89	0
TCGA_HT_7882_01	11.309	8.7074	10.0001	6.5482	14.9956	8.5426	113	1	113	0
TCGA_HT_7884_01	4.8951	5.4877	5.2844	1.8402	6.3914	3.3528	343	0	343	0
TCGA_HT_7902_01	7.3117	6.6014	7.0927	3.8805	7.984	3.3152	956	0	956	0
TCGA_HT_8010_01	6.5905	7.3914	5.6427	3.3133	7.2166	7.4663	50	0	50	0
TCGA_HT_8011_01	10.2407	9.3122	9.795	5.9112	11.1632	8.1985	494	0	278	1
TCGA_HT_8012_01	4.817	6.3004	4.683	1.9307	6.5226	3.375	286	0	133	1
TCGA_HT_8013_01	6.0214	4.6858	7.7555	3.3719	8.4625	3.7079	1933	1	1306	1
TCGA_HT_8015_01	9.2745	8.2769	10.5151	9.4086	11.4835	7.91	3	0
TCGA_HT_8018_01	8.9859	7.9316	8.1892	5.5033	12.0907	6.446	1152	1	1152	0
TCGA_HT_8019_01	7.1508	8.4321	5.7936	1.1932	8.0648	7.3573	1004	0	1004	0
TCGA_HT_8104_01	10.9068	10.0754	11.6211	8.3001	11.0168	9.0594	372	0
TCGA_HT_8105_01	6.4129	6.7044	8.1724	4.3276	8.5583	5.0403	190	0	190	0
TCGA_HT_8106_01	8.644	6.0875	10.2258	9.0026	10.5751	7.6273	3	0	3	0
TCGA_HT_8107_01	6.8775	7.5263	6.3008	3.8571	7.7444	8.3887	14	0	14	0
TCGA_HT_8108_01	5.7985	4.3813	5.02	1.6987	7.0282	3.8925	76	0	76	0
TCGA_HT_8109_01	5.7457	6.4918	6.862	2.3445	7.3816	5.4105	169	0
TCGA_HT_8110_01	9.2567	9.0935	9.6692	7.4455	10.679	8.4831	419	0	419	0
TCGA_HT_8111_01	7.1253	5.6584	8.1934	4.08	6.5161	4.9403	7	0
TCGA_HT_8113_01	5.5411	7.9307	5.3956	2.3277	6.8939	5.9483	900	0	900	0
TCGA_HT_8114_01	6.4381	4.7886	5.7058	4.1249	10.1705	5.5143	118	0	118	0
TCGA_HT_8558_01	6.0251	7.4449	4.785	2.3926	7.4653	6.6467	418	0	418	0
TCGA_HT_8563_01	7.493	4.7407	9.6356	6.525	9.112	7.3385	860	0	860	0
TCGA_HT_8564_01	7.9112	8.3028	6.8652	3.7295	10.7502	9.4437	478	0	120	1
TCGA_HT_A4DS_01	11.9405	9.3842	12.3928	6.1025	13.0421	9.2636	7	0
TCGA_HT_A4DV_01	6.7032	6.2517	6.4094	2.3219	8.0056	3.8679	792	0	792	0
TCGA_HT_A5R5_01	8.1059	6.5682	7.6555	4.7908	9.2934	4.495	4	0
TCGA_HT_A5R7_01	7.0774	7.1666	6.242	3.3358	7.0619	5.7964	426	0	426	0
TCGA_HT_A5R9_01	6.8403	6.1004	5.9295	1.7021	9.008	3.3876	2	0
TCGA_HT_A5RA_01	10.6706	9.8712	10.807	6.8459	12.4257	7.9394	832	0	832	0
TCGA_HT_A5RB_01	4.2643	6.0694	4.0304	0.97	6.804	4.6695	3	0
TCGA_HT_A5RC_01	10.9873	8.6985	12.12	7.5441	12.3384	10.0295	162	1	162	0
TCGA_HT_A614_01	6.2775	6.3483	6.6299	1.7819	7.4238	2.6702	82	0
TCGA_HT_A615_01	6.1498	6.0609	6.7481	3.687	7.2239	3.5887	515	0	515	0
TCGA_HT_A616_01	6.1545	6.8989	4.3393	0.5667	7.5144	4.8042	55	0
TCGA_HT_A617_01	10.6195	8.9103	10.8783	6.8857	12.851	10.4268	491	0
TCGA_HT_A618_01	8.8523	7.5201	8.7631	5.5361	8.3675	6.2843	512	0	512	0
TCGA_HT_A619_01	4.448	4.4776	4.6436	4.9903	8.6303	5.8134	587	0	587	0
TCGA_HT_A61A_01	6.5974	8.2035	4.5097	2.959	8.6794	6.3545	194	0
TCGA_HT_A61B_01	6.7432	4.5083	8.213	2.3209	9.7381	5.8203	533	0	533	0
TCGA_HT_A61C_01	9.7263	9.0136	9.4891	7.5693	12.7374	7.6477	103	0
TCGA_HT_A74H_01	10.8097	9.1092	8.8855	8.1933	11.0578	4.8386	74	0
TCGA_HT_A74J_01	5.7259	5.9942	8.5199	6.3637	7.672	4.6817	320	0	320	0
TCGA_HT_A74K_01	8.4628	5.7103	8.8107	4.6555	11.5796	5.2551	467	0	467	0
TCGA_HT_A74L_01	2.777	5.0605	3.9183	3.6677	5.8959	2.6242	336	0	336	0
TCGA_HT_A74O_01	7.1249	5.4752	7.8053	4.4611	8.9192	3.1119	3	0
TCGA_HW_7486_01	5.645	5.9816	6.0451	2.9546	7.3333	2.6623	609	0	609	0
TCGA_HW_7487_01	5.1424	7.034	7.7725	2.3403	7.0439	5.105	409	0	409	0
TCGA_HW_7489_01	6.7581	7.0244	6.874	2.4664	7.5783	5.0908	253	0	253	0
TCGA_HW_7490_01	5.9183	5.4602	8.2711	2.7877	8.8346	2.7877	585	0	585	0
TCGA_HW_7491_01	3.2341	2.7654	2.4195	2.1634	7.3926	3.9269	1222	0	1222	0
TCGA_HW_7493_01	7.0875	6.7298	5.6887	2.958	8.2911	5.0556	1092	0	1092	0
TCGA_HW_7495_01	5.2418	6.3704	5.2418	1.8821	6.6659	4.6757	131	0	131	0
TCGA_HW_8319_01	5.7256	5.7342	6.486	3.1039	6.5605	4.0997	262	0	262	0
TCGA_HW_8320_01	3.6493	4.2092	6.1776	1.6321	6.7228	3.2851	272	0	272	0
TCGA_HW_8321_01	5.4609	5.7042	6.3388	5.2191	7.131	4.6779	596	0	596	0
TCGA_HW_8322_01	5.295	4.1651	6.4212	0.9078	7.0266	3.822	542	0	542	0
TCGA_HW_A5KJ_01	7.2542	6.7064	7.7302	3.4522	9.3584	3.5777	619	0	615	1
TCGA_HW_A5KK_01	10.9262	8.984	12.5671	7.5072	11.4958	8.4363	388	1	388	0
TCGA_HW_A5KL_01	2.9157	5.0354	5.8474	1.7389	6.372	3.1617	633	0	633	0
TCGA_HW_A5KM_01	5.9978	3.0844	7.084	2.5821	8.5133	4.4451	630	0	630	0
TCGA_IK_7675_01	4.2553	6.5254	5.1921	3.1598	6.8767	2.7473	578	1	123	1
TCGA_IK_8125_01	5.9352	6.3223	6.3715	1.3467	7.4871	5.9058	1120	0	1120	0
TCGA_KT_A74X_01	6.6808	4.2755	5.9235	1.2839	8.1335	4.6166	159	0	159	0
TCGA_KT_A7W1_01	10.8143	9.3108	11.6617	5.4412	12.2746	9.3257	144	0
TCGA_P5_A5ET_01	4.2617	7.1184	3.4438	0.8404	6.4126	3.6846
TCGA_P5_A5EU_01	8.0984	8.8809	8.2237	4.4154	9.9437	6.6393
TCGA_P5_A5EV_01	4.6757	5.018	5.5009	0.4881	6.6788	4.5573	7	0
TCGA_P5_A5EW_01	3.9913	4.4936	6.1063	0.8703	4.9835	2.2406	204	0	204	0
TCGA_P5_A5EX_01	8.8581	5.6055	12.5255	6.5977	11.3326	6.6466	50	0	50	0
TCGA_P5_A5EY_01	9.1245	8.4987	9.6989	5.81	10.653	9.9465	72	0
TCGA_P5_A5EZ_01	6.9029	5.7967	6.97	3.7883	8.2561	4.7856	70	0	70	0
TCGA_P5_A5F0_01	5.1245	7.0544	5.0279	0.9287	6.937	5.4115	125	0	125	0
TCGA_P5_A5F1_01	6.6247	6.2361	7.153	3.0768	7.9596	4.6323	179	0	179	0
TCGA_P5_A5F2_01	5.0949	6.7122	6.2571	1.5475	8.2198	4.8281	232	0	232	0
TCGA_P5_A5F4_01	6.4509	7.249	4.1571	2.5866	7.7447	5.8325	23	0
TCGA_P5_A5F6_01	9.6578	6.9352	10.3034	4.7531	12.2266	7.9506	39	0	39	0
TCGA_P5_A72U_01	11.0105	9.2269	9.7463	7.6875	12.704	10.7314	5	0
TCGA_P5_A72W_01	4.6613	3.6016	7.4978	3.4088	6.6104	2.6001	317	0	317	0
TCGA_P5_A72X_01	6.8047	6.8932	7.26	3.7792	8.8357	4.9622	403	0
TCGA_P5_A72Z_01	3.9822	2.9148	5.0601	1.9085	8.1161	3.3148	354	0
TCGA_P5_A730_01	5.6425	5.5431	8.1892	2.5243	8.1986	3.3931	6	0
TCGA_P5_A731_01	7.9961	7.8266	7.7277	6.2003	11.8082	5.9653	274	0
TCGA_P5_A733_01	7.2566	6.7565	7.3283	4.0515	8.3563	5.0714	414	0
TCGA_P5_A735_01	2.9807	5.1485	4.3189	1.4454	5.5176	2.6253
TCGA_P5_A736_01	7.6895	6.8536	8.7337	5.8449	9.161	3.7798
TCGA_P5_A737_01	6.003	4.7884	6.2473	0	9.0069	2.3062
TCGA_P5_A77W_01	5.5035	4.7502	4.0957	0.4778	6.5733	3.7617
TCGA_P5_A77X_01	5.7447	6.005	5.4672	0.4935	6.7144	4.114
TCGA_P5_A780_01	7.1328	5.8479	8.1257	5.4953	8.3851	3.9848
TCGA_P5_A781_01	4.6384	5.9585	5.8812	0.8563	6.6242	3.052
TCGA_QH_A65R_01	6.3178	6.2408	6.8508	3.0811	8.5837	3.4529	461	0	461	0
TCGA_QH_A65S_01	6.2761	6.0549	6.9895	1.5039	7.5041	2.0215	77	0	77	0
TCGA_QH_A65V_01	5.8115	5.6585	5.1774	2.8443	7.8733	3.3269	384	0	384	0
TCGA_QH_A65X_01	6.6308	5.7541	7.6427	3.9789	10.7145	4.6887	482	0	482	0
TCGA_QH_A65Z_01	5.6047	5.0216	5.4401	1.209	6.4086	4.4871	125	0	125	0
TCGA_QH_A6CS_01	9.4755	8.9186	9.3057	7.0835	10.4404	10.6768	588	0	498	1
TCGA_QH_A6CU_01	7.8297	6.9923	6.3323	6.3619	7.9351	2.1173	451	0	451	0
TCGA_QH_A6CV_01	11.1909	9.6592	11.8958	2.6878	11.912	10.0489	442	0	442	0
TCGA_QH_A6CW_01	5.4592	3.9225	6.3474	2.7146	7.274	3.9225	414	0	414	0
TCGA_QH_A6CX_01	11.8072	9.149	12.1361	6.1597	12.0829	8.2356	372	1	273	1
TCGA_QH_A6CY_01	5.9084	6.6696	5.4696	2.3038	7.0499	4.5988	67	0	67	0
TCGA_QH_A6CZ_01	3.7394	5.6898	5.8176	0	5.9904	4.8329	279	0	279	0
TCGA_QH_A6X3_01	4.908	4.4254	5.7755	1.1893	5.955	3.491	313	0	313	0
TCGA_QH_A6X4_01	4.6752	4.6432	5.2265	2.0246	5.9629	3.3513	442	0	442	0
TCGA_QH_A6X5_01	5.3142	5.8456	4.7978	2.4086	6.857	1.2848	497	0	497	0
TCGA_QH_A6X8_01	6.0726	5.8121	6.4971	1.7579	7.4601	4.1436	509	0	509	0
TCGA_QH_A6X9_01	5.47	5.8339	4.746	1.759	6.8008	3.7356	58	0	58	0
TCGA_QH_A6XA_01	4.7225	5.0481	5.7073	1.4764	6.6493	2.0424	502	0	502	0
TCGA_QH_A6XC_01	10.5263	9.9631	11.1339	6.34	11.4466	9.11	153	0	153	0
TCGA_QH_A86X_01	5.4204	5.7597	5.7889	1.0758	6.459	4.8705	337	0	337	0
TCGA_QH_A870_01	4.2526	5.8863	5.1077	0.5266	5.7862	3.7371	395	0	335	1
TCGA_R8_A6MK_01	5.9647	5.5264	4.8546	2.1989	6.6775	5.889	2702	0
TCGA_R8_A6ML_01	6.4099	4.5428	6.8566	2.9435	7.8939	3.5586	2860	0
TCGA_R8_A6MO_01	6.9925	6.0242	7.1496	3.7561	8.5733	3.5078	993	0
TCGA_R8_A6YH_01	3.3524	3.9468	6.0508	2.072	6.4648	3.3524
TCGA_R8_A73M_01	3.9725	5.3092	5.7785	0	7.0817	2.6879	1806	0	1806	0
TCGA_RY_A83X_01	4.7531	4.889	5.4245	1.2214	7.1309	2.8729	939	0	939	0
TCGA_RY_A83Y_01	6.6723	5.1439	4.8635	1.624	7.8652	3.445
TCGA_RY_A83Z_01	6.234	4.7055	7.286	2.7049	7.8254	2.3261
TCGA_RY_A840_01	3.7577	2.7752	5.2852	0.8759	6.4975	3.1592	854	0	854	0
TCGA_RY_A843_01	4.9698	5.3954	5.6483	1.7243	6.8748	7.9153
TCGA_RY_A845_01	4.4736	4.9638	3.6447	0.7817	6.2441	4.7297
TCGA_RY_A847_01	5.5922	5.9695	5.3498	1.5797	7.3541	3.8995
TCGA_S9_A6TS_01	5.8659	6.4803	8.1612	1.2159	8.0384	3.9589	1891	1	1324	1
TCGA_S9_A6TU_01	4.54	5.6101	6.0525	1.942	7.3572	2.7408	2650	0	2650	1
TCGA_S9_A6TV_01	8.1614	2.4484	9.1864	7.2449	10.4183	5.3514	571	0	571	0
TCGA_S9_A6TW_01	5.9413	5.9642	6.5679	6.084	9.3426	6.499	1151	0	861	1
TCGA_S9_A6TX_01	4.7881	5.4464	5.8463	1.9515	6.9483	4.4252	1049	0	1049	0
TCGA_S9_A6TY_01	4.4936	5.8239	7.2906	1.1496	6.8523	4.5447	953	0	953	0
TCGA_S9_A6TZ_01	5.9224	4.6386	7.7512	2.9822	7.8745	3.4078	873	0	873	0
TCGA_S9_A6U0_01	11.0752	9.2368	10.9012	8.9829	12.4775	8.1977	698	0	692	1
TCGA_S9_A6U1_01	4.3596	6.3347	6.061	1.3753	6.5768	4.181	536	0	536	0
TCGA_S9_A6U2_01	5.9107	6.3311	4.5091	0.9609	7.686	2.9309	719	0	719	0
TCGA_S9_A6U5_01	7.7785	5.1538	6.0254	2.3839	7.875	4.5461	992	0	992	0
TCGA_S9_A6U6_01	5.6188	5.9905	5.6422	0.4867	7.0019	4.125	489	0	489	0
TCGA_S9_A6U8_01	4.9201	5.3188	5.4065	2.0749	6.9226	3.1464	2988	1	367	1
TCGA_S9_A6U9_01	6.2605	5.4251	5.7933	4.1593	8.5963	1.7696	2918	0	2918	0
TCGA_S9_A6UA_01	9.8698	8.577	11.1153	7.0733	13.8617	7.2369	178	1	161	1
TCGA_S9_A6UB_01	3.147	4.5932	4.855	0.9054	5.5362	2.0201	3236	0	3236	0
TCGA_S9_A6WD_01	5.0987	5.9962	6.6075	2.464	6.243	4.1233	2114	0	2114	0
TCGA_S9_A6WE_01	4.6851	5.3259	4.0254	2.3351	6.5962	3.3841	2208	0	2208	0
TCGA_S9_A6WG_01	8.7073	7.1293	6.2965	3.6202	13.0345	4.6192	2437	0	2437	0
TCGA_S9_A6WH_01	5.2942	5.0684	5.2557	3.6285	6.5064	5.3317	987	0	987	0
TCGA_S9_A6WI_01	6.4814	8.0076	5.2297	1.7802	7.6309	5.4637	2585	0	2585	0
TCGA_S9_A6WL_01	7.1871	7.0806	8.333	5.8755	9.9143	5.6864	946	0	946	0
TCGA_S9_A6WM_01	10.6872	9.7868	11.5208	6.1612	11.8011	8.2466	604	0	505	1
TCGA_S9_A6WN_01	7.0038	5.8987	12.2666	7.4636	9.1632	7.7714	484	0	303	1
TCGA_S9_A6WO_01	4.0349	4.8572	5.1504	1.7364	5.5017	2.0925	566	0	566	0
TCGA_S9_A6WP_01	7.5935	6.3471	7.4659	2.3721	8.4446	4.8328	461	0	461	0
TCGA_S9_A6WQ_01	7.1722	5.7882	6.0965	2.2537	7.9252	1.8126	428	0	428	0
TCGA_S9_A7IQ_01	5.5841	7.8755	5.2257	0.4227	7.1592	5.1586	1099	0	1099	0
TCGA_S9_A7IS_01	7.0466	8.0454	8.401	3.8228	10.7862	8.641	241	1	241	0
TCGA_S9_A7IX_01	10.2608	9.0879	10.767	6.5187	12.0278	9.2752	679	0	679	1
TCGA_S9_A7IY_01	6.712	5.6335	5.982	2.9161	7.1712	4.6354	715	0	715	0
TCGA_S9_A7IZ_01	6.02	6.6453	6.8275	6.1928	7.5028	4.8269	217	0	217	0
TCGA_S9_A7J0_01	5.7387	3.2183	6.5093	3.8498	7.072	5.7213	609	0	390	1
TCGA_S9_A7J1_01	4.7853	5.0529	5.7034	0.5956	6.4149	6.2599	249	0	249	0
TCGA_S9_A7J2_01	3.0424	6.1672	5.6481	0	6.3998	3.5908	62	0	62	0
TCGA_S9_A7J3_01	6.1594	5.8641	6.6598	3.0839	7.6893	4.5684	518	0	518	0
TCGA_S9_A7QW_01	3.6616	6.3217	3.5596	0.8979	5.3925	4.4971	458	0	290	1
TCGA_S9_A7QX_01	4.4712	4.7433	6.3088	1.5068	6.9373	4.2092	399	0	399	0
TCGA_S9_A7QY_01	6.5293	6.7476	5.8787	3.2299	7.8017	2.2546	863	0	863	0
TCGA_S9_A7QZ_01	5.7313	6.6795	5.3004	1.5654	7.7081	4.4954	396	0	396	0
TCGA_S9_A7R1_01	5.9231	6.3009	6.9601	1.0271	7.864	4.0044	5166	1	5166	0
TCGA_S9_A7R2_01	10.1083	8.6143	8.9015	8.307	10.5077	6.3488	316	1	316	0
TCGA_S9_A7R3_01	6.1034	5.5441	7.1083	1.9804	6.5887	4.5598	3013	0	3013	0
TCGA_S9_A7R4_01	7.872	5.9756	6.6795	2.3758	8.6935	3.9038	914	0	914	0
TCGA_S9_A7R7_01	7.741	5.2598	10.6022	9.1266	9.8752	5.0097	3000	0	2894	1
TCGA_S9_A7R8_01	3.9088	4.3737	7.2878	1.8465	6.7751	4.2214	961	1
TCGA_S9_A89V_01	8.6449	9.1942	5.0229	4.7295	11.2586	8.2334	569	0
TCGA_S9_A89Z_01	7.0455	4.5829	7.5589	6.6445	8.8284	5.0259	364	0	364	0
TCGA_TM_A7C3_01	10.1114	9.4413	12.1558	4.1531	12.1586	9.7812	1504	0	1323	1
TCGA_TM_A7C4_01	7.6121	7.3405	5.3369	2.7739	8.9439	5.9949	1470	0	1470	0
TCGA_TM_A7C5_01	4.3242	4.6892	4.4049	0.6569	6.932	5.1064	1500	0	1500	0
TCGA_TM_A7CA_01	4.7857	5.4186	3.575	0.963	6.2114	4.0992	1058	0	1058	0
TCGA_TM_A7CF_01	5.5659	7.1641	6.2068	0	7.1132	4.2222	1472	0
TCGA_TM_A7CF_02	5.082	6.1202	5.8418	1.9327	7.2001	3.1672	1472	0
TCGA_TM_A84B_01	7.0123	10.1484	6.5659	2.6145	10.365	9.8647	758	1	758	0
TCGA_TM_A84C_01	11.687	8.0964	12.117	6.0883	12.7449	8.3099	492	1	492	0
TCGA_TM_A84F_01	7.426	7.7022	8.2048	2.7626	8.4909	4.685	1796	0	1796	0
TCGA_TM_A84G_01	3.4399	4.4982	4.204	0	6.598	3.1631	1236	0	1236	0
TCGA_TM_A84H_01	4.5977	3.9208	7.291	2.2101	5.22	4.1444	926	0	926	0
TCGA_TM_A84I_01	4.9535	2.4015	6.1197	4.6521	6.6538	3.7919	854	0	854	0
TCGA_TM_A84J_01	6.143	3.3474	9.0013	6.4489	11.6352	5.0857	735	0	454	1
TCGA_TM_A84L_01	5.533	5.716	6.0457	2.1288	7.1664	3.2005	1242	1	1045	1
TCGA_TM_A84M_01	3.006	3.8318	6.9285	0.4995	6.556	2.2399	754	0	754	0
TCGA_TM_A84O_01	6.145	7.0076	6.7386	1.7137	7.3108	5.7024	1011	1	1011	0
TCGA_TM_A84Q_01	5.1602	4.5603	7.108	3.2237	6.9385	4.0262	772	0	455	1
TCGA_TM_A84R_01	6.4976	7.3299	6.7332	1.9279	7.8766	6.2467	566	0	566	0
TCGA_TM_A84S_01	6.1735	5.6428	7.2775	1.8954	7.2605	2.21	454	0	454	0
TCGA_TM_A84T_01	3.8054	4.5958	5.286	0	6.4921	3.4853	724	0	724	0
TCGA_TQ_A7RF_01	6.1938	5.0461	6.1938	0.9279	7.008	3.0392
TCGA_TQ_A7RG_01	5.2251	5.5006	4.9315	1.7906	7.3517	3.885
TCGA_TQ_A7RH_01	5.304	6.4329	6.4007	1.5391	6.8924	5.1264
TCGA_TQ_A7RI_01	4.6066	5.1033	5.2841	2.3707	6.7126	3.8004
TCGA_TQ_A7RJ_01	5.5005	6.1869	5.7544	1.8238	6.5806	4.1743
TCGA_TQ_A7RK_01	3.6315	3.9909	6.3893	2.3056	6.1785	1.4609
TCGA_TQ_A7RK_02	4.04995	4.7479	5.4075	1.54005	6.6323	2.75695
TCGA_TQ_A7RM_01	4.6814	2.1887	2.3412	1.3365	8.9451	3.7227
TCGA_TQ_A7RN_01	4.1176	5.4103	5.2762	1.1753	6.441	3.6954
TCGA_TQ_A7RO_01	4.6428	5.1267	4.9479	0.5385	7.0517	4.1491
TCGA_TQ_A7RP_01	9.0789	9.8932	10.1204	14.1602	10.2806	7.6454
TCGA_TQ_A7RQ_01	4.366	5.8473	5.0607	1.2066	6.208	6.136
TCGA_TQ_A7RR_01	6.3624	5.7214	4.9909	3.1902	7.1942	3.7447
TCGA_TQ_A7RS_01	3.795	5.3498	2.2596	1.5332	6.2837	2.6562
TCGA_TQ_A7RU_01	4.9718	4.438	3.6797	1.18	7.5669	3.3621
TCGA_TQ_A7RV_01	4.7531	5.3474	4.4086	2.3787	7.1371	5.3875
TCGA_TQ_A7RV_02	6.5293	6.8402	5.2032	4.4054	8.7245	4.8462
TCGA_TQ_A7RW_01	5.4954	4.2888	5.3611	3.9103	6.242	4.8615
TCGA_TQ_A8XE_01	3.6682	3.1783	6.5429	1.8328	5.9228	3.5379
TCGA_TQ_A8XE_02	6.1912	3.3857	9.6538	2.0474	8.1063	6.0449
TCGA_VM_A8C8_01	6.973	4.2771	5.8738	0	6.0872	3.5735	1309	0	1309	0
TCGA_VM_A8C9_01	12.2342	8.8537	8.6787	11.1418	13.7897	6.4102	915	0	915	0
TCGA_VM_A8CA_01	8.1677	7.0389	7.6937	3.53	10.8149	8.1367	411	0
TCGA_VM_A8CB_01	3.6837	4.8797	4.6538	1.2762	6.6584	4.015	3	0
TCGA_VM_A8CD_01	11.8309	9.006	11.4424	6.2296	12.4384	10.4585	240	1	240	0
TCGA_VM_A8CE_01	5.9032	5.772	4.9738	1.1382	7.3952	3.8289	1093	0	1093	0
TCGA_VM_A8CF_01	9.0428	5.9583	7.7766	4.3672	8.5647	3.8674
TCGA_VM_A8CH_01	5.4719	5.0054	6.9982	1.7475	7.5561	4.7764	714	0	714	0
TCGA_VV_A829_01	4.1479	2.7467	7.1679	3.9336	8.8493	5.357	1127	0	1127	0
TCGA_VV_A86M_01	4.237	2.9442	4.0553	4.7371	7.9938	4.5086	487	0	487	0
TCGA_VW_A7QS_01	6.0218	3.4107	9.7828	7.313	10.5134	5.4773	706	0	706	0
TCGA_VW_A8FI_01	10.7742	9.0488	12.0045	5.3124	12.299	9.1277	245	1	245	0
TCGA_W9_A837_01	4.851	6.5896	5.8164	1.0702	6.7554	4.6758	1553	0	1553	0
TCGA_WH_A86K_01	5.3242	5.4682	6.5101	2.3804	8.2388	2.8093	405	0	405	0
TCGA_WY_A858_01	6.6042	6.1122	9.0555	4.2883	8.8558	5.1081	1337	0	1337	0
TCGA_WY_A859_01	4.3028	7.1015	5.2536	1.1967	6.8297	5.0854	1213	0	1213	0
TCGA_WY_A85A_01	5.7349	5.3616	4.5984	0	6.839	3.8274	1320	0	1320	0
TCGA_WY_A85B_01	4.0054	3.6574	6.3783	1.656	6.8241	5.0184
TCGA_WY_A85C_01	5.4017	5.8012	7.116	3.434	8.0543	4.2151
TCGA_WY_A85D_01	4.9348	5.1504	7.4189	1.7931	6.0571	2.1544
TCGA_WY_A85E_01	6.3692	5.5233	6.1331	0	7.2321	4.9829

## Sheet: Rawdata of Figure 3
Sample ID	EMP3	FBXO17	METTL7B	SERPINA5	TIMP1	VAV3	Overall survival (days)	Censor (1-death)
407	-1.37422	-0.451981	0.0423999	-0.839159	-1.51624	-2.60291	1054	0
589	-0.874539	-1.03095	-0.665407	-1.71935	-0.24964	-2.41165	816	0
543	-1.66574	-0.904101	-1.50251	-1.77845	-1.65332	-2.13494	867	0
672	-1.5205	-1.08187	-1.44179	-1.17717	-2.8458	-1.85963	711	0
348	-1.83565	-0.536541	-1.59019	-2.45463	-2.46353	-1.8007	1144	0
395	-1.20868	-0.615264	-1.64001	-0.951184	-2.03385	-1.78785	1076	0
514	-1.87688	-1.17906	-1.1585	-1.4643	-1.79891	-1.71126	901	0
490	-1.23502	-0.565183	-0.62643	-1.32438	-1.86645	-1.61046	1097	0
482	-0.137762	-0.536921	-0.202938	-0.910305	-0.570011	-1.58884	942	0
398	0.10103	-0.360816	-0.614108	-0.90304	-1.705	-1.58172	1063	0
671	-1.17865	-0.752391	-1.00505	-1.58777	-2.2745	-1.48551	711	0
253	-1.46678	-1.29013	-0.0693927	-1.97515	-2.45499	-1.47523	1658	0
583	-0.548337	-0.0221095	-0.230128	-1.14159	-1.82325	-1.47304	840	0
281	-0.925127	-0.887205	-1.11995	-1.03588	-2.26322	-1.46787	1235	0
446	-1.24266	-0.863018	0.814373	-0.972392	-1.44234	-1.42436	997	0
378	-1.66232	-1.20113	-1.35351	-1.50076	-2.79445	-1.4035	1095	0
590	-0.531855	-0.65683	-0.480146	-1.195	-0.740369	-1.40031	830	0
411	-0.570897	-0.496386	-1.1113	-1.34897	-2.36639	-1.39412	1051	0
822	-0.799242	-0.849983	-1.09098	-1.36576	-2.16196	-1.36285	593	1
403	-0.63616	-0.842371	-0.173097	-1.10391	0.271485	-1.35347	1165	0
547	-0.658812	-0.901362	2.04335	1.44396	-0.972321	-1.32309	580	0
639	-0.930578	-0.242328	-1.26718	-0.869688	-2.17372	-1.29669	752	0
544	-1.04934	-0.580067	-0.865851	-1.43652	-1.80324	-1.28992	882	0
469	-0.494749	-0.822645	-0.923561	-1.50207	-1.94736	-1.24135	978	0
648	-0.498139	-0.534381	-0.504504	-0.962993	-2.2456	-1.23856	754	0
566	-0.355648	-0.634284	-0.921029	-0.70761	-2.70451	-1.23404	845	0
528	-1.62348	-0.370214	-0.775878	-1.03451	-2.43789	-1.20966	886	0
615	-0.961965	-0.725162	-0.807603	-0.816654	-2.58297	-1.18192	782	0
399	-1.16236	-0.831787	0.0246501	-1.02312	-1.63762	-1.17855	1063	0
712	-0.871126	-0.757087	-0.835975	-1.20789	-2.94471	-1.16625	661	0
753	-0.777514	-0.522508	-0.872436	-1.25143	-3.28747	-1.15209	613	0
708	-0.605863	-0.738963	-1.01215	-0.516586	-2.86323	-1.11318	663	0
273	-1.20227	-0.859225	-1.27806	-2.1262	-2.15509	-1.11269	1252	0
314	-0.456044	-0.640186	-0.997385	0.0672812	-1.11549	-1.083	1341	0
334	0.229524	-0.329162	-0.268661	-3.02847	-0.881251	-1.07078	1299	0
776	-0.65891	-0.571817	-0.950032	-0.881909	-1.72593	-1.05343	587	0
549	-1.14007	-0.567021	-1.08079	-0.881988	-1.95626	-1.05341	413	1
662	-2.05775	-0.89145	-1.14726	-1.48795	-1.78619	-1.03226	300	1
736	-0.47147	-0.399233	-0.840152	-1.53322	-1.48551	-1.03082	629	0
441	-0.971687	-0.45273	-0.500809	-1.39488	-1.5393	-1.02734	993	0
364	-0.77168	-0.909503	-1.0881	-0.95952	-1.84201	-1.02684	878	1
633	0.219059	0.0969443	-1.04647	2.06583	-2.26055	-0.994682	761	0
459	-0.716831	-0.739988	0.116539	0.154134	-0.0548391	-0.980505	977	0
518	-0.116084	-0.676072	0.202605	-0.219404	-0.631428	-0.969648	204	1
500	-1.0971	-0.659258	-1.01918	-0.80419	-0.996204	-0.950045	926	0
455	-1.55461	-0.828458	-1.35113	-1.27538	-2.97096	-0.948525	984	0
598	-1.01095	-0.951919	-0.992025	-1.57829	-2.57362	-0.930654	961	0
296	-0.583588	-0.906925	-1.06992	-0.25303	-1.76547	-0.924596	1215	0
447	-0.141017	-0.414434	0.16444	-1.41146	0.595097	-0.919134	1007	0
357	-1.40463	-1.145	-1.14618	-1.12277	-1.2525	-0.906574	1132	0
442	-0.21616	-0.5064	0.437736	-0.0273886	0	-0.895252	559	0
673	0.198852	-0.206046	-0.536993	0.316568	-0.83732	-0.892179	437	1
415	-0.870039	-0.215064	-1.40116	-2.76839	-1.78081	-0.880454	1040	0
592	-1.29287	-0.973244	0.200692	-1.12563	-2.81943	-0.874634	826	0
711	-0.762658	-0.39588	0.260983	-0.883243	-0.256818	-0.873729	662	0
659	-0.20576	-0.3037	-0.804424	-0.333294	-1.16251	-0.871305	725	0
124	1.65773	0.763031	0.728645	1.69044	1.82807	-0.853786	414	1
440	-0.873802	-0.319605	-1.08064	-0.996186	-1.07328	-0.847214	993	0
664	-1.01362	-1.14928	-0.530936	-0.630987	-0.875766	-0.84377	790	0
434	-0.457336	-0.537461	0.536502	-0.671798	-0.485234	-0.83593	1012	0
191	0	0.096458	0.512665	-1.27938	-1.8672	-0.825792	1377	0
601	-0.456711	-0.562991	-0.461598	-0.61515	-1.22644	-0.809447	818	0
792	-0.594925	-0.221981	-0.519316	-1.04531	-1.1215	-0.796798	557	0
571	-0.406182	-0.716516	-0.602889	-0.791415	-2.23837	-0.79542	854	0
232	0.0692105	-0.691728	0.821203	-0.251998	-0.153605	-0.788374	429	1
522	-0.693071	-0.309958	1.58895	-0.839435	-0.611111	-0.773147	908	0
512	-0.809	-0.300381	-0.304389	1.85553	-0.991919	-0.765275	588	0
519	-1.00099	-0.414961	-0.666665	-1.0432	-1.55059	-0.758059	895	0
315	-0.501641	-0.505619	-1.41154	-0.198659	-2.02438	-0.748003	1182	0
312	-0.398066	-0.816838	-1.00466	-0.187494	-0.00173569	-0.716653	840	1
418	-0.248495	0.329481	-1.27499	-1.62174	-0.88458	-0.702835	1035	0
377	0.4909	1.32417	-0.795665	2.09153	0.349111	-0.681158	399	1
285	-0.854964	-0.625931	-0.312378	-3.25235	-2.68724	-0.657266	1225	0
352	-0.894217	0.119772	-1.14464	-2.8394	-1.36004	-0.65458	1291	0
331	-0.152042	-0.691589	-0.178217	1.162	0.123934	-0.647939	1304	0
743	-0.207249	-0.69864	0.191112	-0.486815	1.3469	-0.639717	622	0
505	0.656121	-0.233771	2.30326	1.94179	1.81243	-0.634047	923	0
379	-0.672711	-0.775835	-0.0505075	-0.197259	0.0882378	-0.626167	1091	0
623	-1.1862	-0.407399	-1.14549	-1.07558	-2.61175	-0.61273	804	0
439	-0.435395	-0.770031	0.21144	-0.36242	-0.842684	-0.588797	565	0
316	-0.693017	-0.950065	-0.0493131	-2.57343	-1.80375	-0.586044	1181	0
663	-0.856758	-0.571168	0.112793	-0.402891	-1.54537	-0.571114	721	0
291	-0.513496	0.0715966	-0.765699	-2.03389	-0.653859	-0.568504	1223	0
635	-0.793847	0.285209	-0.897927	-1.12987	-1.25152	-0.55998	759	0
317	-1.1736	-0.90894	-0.121764	-1.38071	-1.49175	-0.542242	1180	0
714	-0.661688	-1.52413	1.2546	1.69189	-0.478528	-0.487843	414	1
402	-0.744888	-0.439225	0.147078	-0.680837	-1.72015	-0.453877	1061	0
259	-0.405103	-0.273516	0.440695	0.804341	0.826632	-0.450056	549	1
391	-0.0747256	-0.844044	1.57651	0.129034	2.49527	-0.440052	1234	0
437	0.12965	-0.546828	0.796125	0.438932	-0.0758724	-0.430534	694	0
579	-0.932708	0.0933404	-0.678275	-1.64809	-1.01873	-0.411074	831	0
557	2.44646	1.42358	-1.01143	1.04774	1.67702	-0.387815	257	1
365	-0.140965	0.177971	-0.529728	-0.725439	-1.33778	-0.387474	260	1
548	-0.703052	-1.02672	0.70553	0.40188	0.663647	-0.386381	875	0
609	1.54452	1.48286	1.19427	3.07061	1.00482	-0.377093	512	0
562	2.86979	1.11609	2.51975	1.49796	3.59865	-0.368738	290	1
321	-0.650929	-0.833609	-0.260171	-0.729301	-1.63606	-0.362591	1173	0
489	0.106194	-0.395065	1.11117	0	2.01408	-0.355454	653	0
405	1.18551	1.38271	1.83509	0.832466	2.15474	-0.338029	497	1
746	1.36392	-0.058332	-0.0999985	1.42152	0.820205	-0.327619	619	0
674	-0.812955	-0.0415883	-0.92158	-1.01671	-1.46232	-0.322712	710	0
770	-0.609139	-0.310915	0.0596662	-0.132909	-1.46957	-0.185315	594	0
485	0.000261	0.505555	-1.02078	-1.1761	-0.899337	-0.176167	937	0
552	2.27795	0.646113	-0.423841	5.02309	4.00869	-0.135489	873	0
461	-0.270928	0.130275	-0.221623	-0.23611	-1.54229	-0.135299	991	0
558	-0.717417	-0.486102	-1.1253	-1.40797	-0.652723	-0.135234	613	1
498	-0.131909	0.0333638	-0.721303	-0.960855	-0.926693	-0.1013	356	1
126	1.10134	1.13522	1.19355	1.29665	0.517599	-0.0719843	796	0
E207(epilepsy)	0.0802178	0.253324	-0.775248	0.599414	-0.808976	-0.062829
626	-0.0144086	0	-0.71656	0.780333	-0.18202	-0.0361538	784	0
380	1.76081	0.39913	0.126041	1.34066	2.90069	-0.032033	165	1
484	-0.897815	0.267922	-0.977269	-1.18205	-1.61975	-0.0139122	941	0
492	1.61691	0.354295	-0.669955	0.916617	3.09671	0	652	0
767	0.092402	-0.531702	1.50851	1.2351	2.47167	0.0329399	598	0
NB06(normal brain control)	-0.112494	0.336919	-1.04118	-2.47741	-0.413783	0.0419397
282	0.500129	-1.56481	2.51031	2.60277	2.30565	0.0424681	240	1
393	1.92448	-0.644134	2.80817	-0.581281	4.0047	0.05371	463	0
530	0.0621209	0.490216	0.140789	0.131504	-0.349281	0.0569172	506	1
692	-0.331541	0.199236	-0.794507	-0.678796	-1.68422	0.0639849	689	0
542	-0.194365	0.890576	-0.935014	-0.409452	-0.807117	0.0754433	887	0
438	1.85495	0.369295	0.675058	2.25915	2.54954	0.0984936	777	1
588	1.10184	1.31162	0.574578	1.73553	1.45316	0.117935	533	0
596	2.52047	-0.585699	1.06118	1.972	2.44963	0.126961	962	0
366	2.79762	0.954493	1.68036	2.21972	2.87377	0.129165	255	1
11	0.129201	0.464394	0.899605	-0.57725	3.63193	0.150402	155	1
NB05(normal brain control)	-0.308904	0.193116	-1.40625	-2.68404	-1.7262	0.157488
225	-0.335624	-0.789487	-0.809817	1.62819	1.76387	0.171818	1045	0
323	-1.23298	0.0409808	-0.987402	-1.55981	-1.60145	0.173445	1172	0
275	-0.727042	-0.0750852	-1.41634	-1.24401	-2.01469	0.178164	1221	0
NB07(normal brain control)	-0.118975	0.0260358	-1.38468	-1.57168	-1.08474	0.204274
E166(epilepsy)	0.0133386	0.607385	-0.571394	-0.631687	-0.662654	0.212776
311	-1.1001	-0.382172	-1.44291	-0.134189	-2.78881	0.219723	230	1
719	-0.0925088	0.0169454	-0.934849	-0.964587	-0.105021	0.235345	60	1
351	1.43582	0.99035	0.793343	1.64718	2.29399	0.23864	742	1
404	1.78609	0.754227	1.07899	1.16393	3.22607	0.240449		0
271	1.04396	1.19557	2.29931	0.420328	0.68038	0.269711	1256	0
577	-0.912047	-0.0509419	-0.928278	1.82369	-1.66525	0.293903	526	0
595	0.00970697	0.604252	-0.49148	-0.130874	-0.411599	0.296539	825	0
258	0.39478	0.45198	1.28132	2.67501	1.81652	0.306618	1163	1
156	1.08242	-0.192611	-0.078289	-0.447099	0.986553	0.308341	179	1
210	-0.197898	-0.015451	0.6325	2.53592	1.58986	0.320989	300	1
798	0.256493	-0.534105	0.985732	3.69958	1.18028	0.356383	136	1
203	2.04799	0.500392	1.11773	-0.0879641	1.92076	0.35665	188	1
104	0.429216	0.358766	-0.0612307	-0.746598	0.711099	0.387579	162	1
178	-0.143581	0.49425	-0.482492	0.253534	1.18477	0.390529	966	0
784	0.0281587	0.47878	-0.436327	-0.224432	-0.443017	0.418061	579	0
308	0.141253	0.345655	-0.483647	1.38753	0.153234	0.430889	757	0
433	0.434495	0.149159	0.196752	3.30138	1.80715	0.451556	1013	0
527	-1.15295	-0.0745711	1.1019	1.61123	-0.0658274	0.457839	439	1
474	1.3949	0.0656152	0.5621	1.1659	1.72605	0.459444	1104	0
575	1.71724	0.607127	0.0871997	3.734	3.81249	0.475177	554	0
353	0.393283	0.373458	-0.128962	-0.740909	0.235143	0.479313	530	1
375	2.19174	1.30108	1.26894	0.879607	2.94651	0.492046	657	1
604	2.99157	0.667576	3.29564	3.52137	6.35658	0.502638	381	1
205	0.951801	0.582941	0.263281	0.228809	1.38832	0.51552	292	1
218	-0.0541616	1.61134	-0.903601	-1.04824	-0.272231	0.538157	313	1
264	-0.0572791	1.33426	0.970643	2.04589	1.93451	0.568564	383	1
255	1.94077	-0.0506721	3.08427	0.678865	6.07182	0.579793	591	1
412	0.222972	0.00765181	0.0125809	-1.16768	0.0798082	0.58461	280	0
513	0.630447	0.955685	1.11793	0.648443	0.594583	0.638994	1062	0
778	0.00905657	0.234036	-0.683477	0.969441	-1.29503	0.647793	175	1
729	1.6379	0.692002	3.49676	1.31801	3.35792	0.675064	710	0
570	0.102541	0.149517	0.0159526	1.40256	0.0450449	0.685966	561	0
649	0.226917	0.233872	-0.14366	2.21397	-0.019083	0.698135	147	1
646	1.55469	0.0366569	2.29395	2.23051	4.63587	0.829436	363	1
419	2.76464	1.39169	3.75286	3.49643	4.85185	0.863367	198	1
406	0.910439	0.996281	2.57519	0.407584	3.64157	0.88121	290	1
462	0.154747	0.181375	0	-2.49381	0.554205	0.907304	364	1
523	-0.630806	0.397126	-0.999122	-2.64287	-1.23653	0.924721	888	0
699	2.39579	0.731349	2.27413	4.08109	3.53033	0.980498	584	1
221	2.36942	0.495955	0.935783	3.29539	6.25287	0.987185	287	1
292	0.752861	-1.03702	-0.718435	1.28767	0.511317	0.989678	478	1
693	0.978395	0.346821	0.60068	1.58398	3.25047	1.00188	681	0
713	0.306982	-0.0527015	-1.03309	0.12	0.84989	1.0127	27	1
342	2.34542	1.44624	3.22159	0.0960574	4.38712	1.01297	526	1
476	2.23085	1.47023	2.89821	2.98612	1.94178	1.03196	1089	1
436	1.4208	1.4554	3.86564	1.38071	3.37391	1.04724	568	0
371	2.79961	1.47971	2.25928	1.63245	5.04605	1.05885	671	0
335	0.209795	0.777034	0.529494	0.651351	1.92037	1.08949	385	1
464	1.7333	-0.0295911	1.59138	3.54422	1.07331	1.10727	403	1
684	2.49533	1.45816	2.80836	1.04805	3.03215	1.13793	714	1
454	1.62357	0.451366	3.03456	2.2297	3.78536	1.15161	412	1
764	1.32526	0.329095	0.267663	3.04957	2.57946	1.16483	67	1
231	1.38105	1.6053	3.10565	0.12478	2.5492	1.18163	145	1
370	1.66599	0.676439	2.28725	2.52071	1.63814	1.19015	338	1
741	1.07466	0.255665	0.563406	2.13274	1.59822	1.224	396	1
354	2.33484	1.01277	0.981241	2.26321	1.05888	1.24225	145	0
444	0.152196	0.301174	-0.42995	-0.187252	-0.263864	1.25731	225	1
324	1.12447	-0.437188	0.114957	2.54109	1.68522	1.27174	336	1
775	2.30373	1.09124	1.52976	1.44666	3.53654	1.27896	253	1
718	2.17304	0.618792	4.47639	5.48712	4.778	1.30153	655	0
640	2.67426	0.0146327	1.84094	2.51396	4.30028	1.31933	823	0
172	2.0497	1.31753	2.84229	1.61849	2.82514	1.33992	462	1
346	2.08602	0.366162	1.77629	2.08891	3.94916	1.34557	104	1
260	1.08259	0.940731	-0.938256	0.890451	2.65853	1.40953	567	1
287	2.0718	0.80723	2.99867	1.40221	5.08122	1.41574	563	1
401	0.685412	0.137984	1.41943	0.317329	1.54864	1.44623	168	1
594	1.83503	0.155302	2.26276	7.02666	2.85537	1.46826	532	0
266	0.048409	0.611035	-0.524276	2.22717	2.10373	1.47047	1265	0
345	3.10409	2.36023	3.53939	2.07407	2.74003	1.53779	714	0
683	1.86886	0.620625	2.37781	4.08642	4.71382	1.61711	363	1
628	2.6126	-0.12357	3.76164	1.28249	6.17923	1.62461		0
329	2.72218	1.65373	4.34401	0.620023	4.87567	1.6364	419	1
168	1.6959	0.702225	3.79333	3.17594	4.29846	1.65085	995	0
612	-0.617102	-1.01149	-1.26976	-1.33888	0.0262842	1.65597	504	0
195	1.2226	1.81438	2.29295	1.63308	1.59195	1.70906	455	1
734	2.45081	0.927433	2.33676	4.60188	1.71234	1.7093	480	0
504	1.66508	0.873197	3.38133	2.55982	3.44589	1.71188	563	1
610	-0.892835	1.00891	-1.1592	-0.998877	-0.390436	1.74613	790	0
688	2.64619	0.444046	5.37247	2.72994	5.41071	1.76452	692	0
700	2.08745	0.0898776	4.02224	3.12815	5.08754	1.84194	669	0
606	2.19837	0.854065	3.27308	3.08976	4.14536	1.9238	325	1
709	1.18805	0.844133	2.48839	1.18096	2.57211	2.01669	420	1
680	-0.105812	-0.0374284	0.721458	2.08679	1.45625	2.12433	714	0
373	1.79462	1.50023	3.46311	4.06981	2.52411	2.13651	281	1
593	1.56656	-0.813164	4.38459	3.29057	3.82999	2.15232	243	1
249	2.68792	1.07557	5.10208	2.47002	3.6299	2.19112	312	1
396	-0.964028	-0.145942	-0.84194	-1.01644	0.90898	2.29824	376	1
451	1.76783	0.866081	1.50788	2.12723	3.06722	2.31239	558	0
508	2.16265	1.76845	4.40277	0.418404	2.05805	2.31743	285	1
597	1.07461	0.535322	2.48971	1.69625	1.31655	2.33827	525	0
573	2.35533	0.783024	4.24977	1.8557	5.24882	2.50581	554	0
654	2.10553	-1.55206	4.13296	3.4128	3.41011	2.53472	640	1
240	1.36756	1.61266	3.77445	1.18199	2.11707	3.52408	386	1
387	1.11798	0.589547	0.987248	1.5667	0.560039	3.62614	1084	0

## Sheet: Rawdata of Figure 4
Sample ID	SERPINA5	TIMP1	neoplasm_histologic_grade		Sample ID	SERPINA5	TIMP1	WHO Grade
TCGA_CS_4938_01	2.9473	6.2577	G2		11	-0.57725	3.63193	Ⅳ
TCGA_CS_4941_01	5.5513	11.0219	G3		104	-0.746598	0.711099	Ⅳ
TCGA_CS_4942_01	2.459	7.2401	G3		124	1.69044	1.82807	Ⅳ
TCGA_CS_4943_01	1.2043	7.1148	G3		126	1.29665	0.517599	Ⅳ
TCGA_CS_4944_01	5.352	8.4112	G2		156	-0.447099	0.986553	Ⅳ
TCGA_CS_5390_01	2.6953	7.1077	G2		168	3.17594	4.29846	Ⅳ
TCGA_CS_5393_01	1.9352	7.1188	G3		172	1.61849	2.82514	Ⅳ
TCGA_CS_5394_01	1.7407	7.0963	G3		178	0.253534	1.18477	Ⅳ
TCGA_CS_5395_01	2.2335	10.0949	G2		387	1.5667	0.560039	Ⅱ
TCGA_CS_5396_01	4.6574	8.1285	G3		195	1.63308	1.59195	Ⅳ
TCGA_CS_5397_01	8.9084	11.5684	G3		203	-0.0879641	1.92076	Ⅳ
TCGA_CS_6186_01	2.5738	9.9738	G3		205	0.228809	1.38832	Ⅳ
TCGA_CS_6188_01	7.6691	12.0773	G3		210	2.53592	1.58986	Ⅳ
TCGA_CS_6290_01	4.1893	7.4525	G3		218	-1.04824	-0.272231	Ⅳ
TCGA_CS_6665_01	7.0238	9.3556	G3		221	3.29539	6.25287	Ⅳ
TCGA_CS_6666_01	3.4498	8.8918	G3		225	1.62819	1.76387	Ⅳ
TCGA_CS_6667_01	3.0776	7.5636	G2		508	0.418404	2.05805	Ⅲ
TCGA_CS_6668_01	0.7499	5.9061	G2		396	-1.01644	0.90898	Ⅱ
TCGA_CS_6669_01	0.9338	7.5897	G2		240	1.18199	2.11707	Ⅳ
TCGA_CS_6670_01	0.4603	7.637	G3		249	2.47002	3.6299	Ⅲ
TCGA_DB_5270_01	3.5741	8.9334	G3		688	2.72994	5.41071	Ⅱ
TCGA_DB_5273_01	3.9927	8.3988	G3		255	0.678865	6.07182	Ⅳ
TCGA_DB_5274_01	4.4002	11.1013	G3		610	-0.998877	-0.390436	Ⅱ
TCGA_DB_5275_01	1.9997	7.9616	G3		329	0.620023	4.87567	Ⅲ
TCGA_DB_5276_01	4.2003	7.875	G3		266	2.22717	2.10373	Ⅱ
TCGA_DB_5277_01	1.4621	7.2506	G3		264	2.04589	1.93451	Ⅳ
TCGA_DB_5278_01	0.6958	6.7203	G2		260	0.890451	2.65853	Ⅲ
TCGA_DB_5279_01	2.915	6.9311	G2		718	5.48712	4.778	Ⅱ
TCGA_DB_5280_01	0.7671	6.7316	G2		354	2.26321	1.05888	Ⅲ
TCGA_DB_5281_01	3.7727	8.406	G3		231	0.12478	2.5492	Ⅲ
TCGA_DB_A4X9_01	1.0309	5.8015	G2		476	2.98612	1.94178	Ⅲ
TCGA_DB_A4XA_01	0.6343	7.6343	G2		523	-2.64287	-1.23653	Ⅱ
TCGA_DB_A4XB_01	1.3819	5.4182	G3		406	0.407584	3.64157	Ⅲ
TCGA_DB_A4XC_01	1.8289	7.6446	G2		287	1.40221	5.08122	Ⅳ
TCGA_DB_A4XD_01	1.7613	6.3453	G3		513	0.648443	0.594583	Ⅲ
TCGA_DB_A4XE_01	1.2462	7.352	G3		292	1.28767	0.511317	Ⅳ
TCGA_DB_A4XF_01	5.418	8.0201	G3		412	-1.16768	0.0798082	Ⅲ
TCGA_DB_A4XG_01	0	6.328	G3		308	1.38753	0.153234	Ⅳ
TCGA_DB_A4XH_01	1.9107	7.6849	G2		311	-0.134189	-2.78881	Ⅳ
TCGA_DB_A64L_01	3.152	8.2304	G2		353	-0.740909	0.235143	Ⅲ
TCGA_DB_A64O_01	6.1579	10.5809	G2		474	1.1659	1.72605	Ⅲ
TCGA_DB_A64P_01	4.2565	8.0133	G3		433	3.30138	1.80715	Ⅱ
TCGA_DB_A64Q_01	1.1575	6.076	G2		784	-0.224432	-0.443017	Ⅱ
TCGA_DB_A64R_01	0	6.0427	G2		258	2.67501	1.81652	Ⅱ
TCGA_DB_A64S_01	4.147	8.2449	G2		595	-0.130874	-0.411599	Ⅱ
TCGA_DB_A64U_01	2.2738	6.2943	G2		577	1.82369	-1.66525	Ⅲ
TCGA_DB_A64V_01	3.3918	8.7613	G2		324	2.54109	1.68522	Ⅳ
TCGA_DB_A64W_01	2.1866	7.1742	G3		271	0.420328	0.68038	Ⅱ
TCGA_DB_A64X_01	2.1797	7.9432	G3		351	1.64718	2.29399	Ⅲ
TCGA_DB_A75K_01	2.865	10.5121	G3		275	-1.24401	-2.01469	Ⅱ
TCGA_DB_A75L_01	1.1355	7.3092	G3		335	0.651351	1.92037	Ⅳ
TCGA_DB_A75M_01	2.041	7.1595	G2		342	0.0960574	4.38712	Ⅳ
TCGA_DB_A75O_01	4.0735	7.5096	G3		345	2.07407	2.74003	Ⅳ
TCGA_DB_A75P_01	8.5428	13.1142	G2		346	2.08891	3.94916	Ⅳ
TCGA_DH_5140_01	3.6254	11.644	G3		323	-1.55981	-1.60145	Ⅱ
TCGA_DH_5141_01	4.004	8.4326	G3		596	1.972	2.44963	Ⅲ
TCGA_DH_5142_01	4.2292	7.9549	G3		438	2.25915	2.54954	Ⅲ
TCGA_DH_5143_01	1.6975	7.6857	G3		542	-0.409452	-0.807117	Ⅱ
TCGA_DH_5144_01	0	6.678	G3		692	-0.678796	-1.68422	Ⅱ
TCGA_DH_A669_01	4.8027	8.811	G3		393	-0.581281	4.0047	Ⅲ
TCGA_DH_A669_02	3.5413	10.6283	G3		282	2.60277	2.30565	Ⅱ
TCGA_DH_A66B_01	3.617	7.749	G3		767	1.2351	2.47167	Ⅱ
TCGA_DH_A66D_01	2.9899	7.2465	G3		366	2.21972	2.87377	Ⅳ
TCGA_DH_A66F_01	3.5124	7.1927	G2		370	2.52071	1.63814	Ⅳ
TCGA_DH_A66G_01	5.1794	8.9881	G3		371	1.63245	5.04605	Ⅳ
TCGA_DH_A7UR_01	3.2163	9.5473	G3		373	4.06981	2.52411	Ⅳ
TCGA_DH_A7US_01	1.5935	6.7914	G2		375	0.879607	2.94651	Ⅳ
TCGA_DH_A7UT_01	3.715	7.683	G3		377	2.09153	0.349111	Ⅳ
TCGA_DH_A7UU_01	3.5686	6.5941	G3		492	0.916617	3.09671	Ⅲ
TCGA_DH_A7UV_01	0.4658	6.4132	G3		484	-1.18205	-1.61975	Ⅱ
TCGA_DU_5847_01	4.5891	11.5453	G3		380	1.34066	2.90069	Ⅳ
TCGA_DU_5849_01	2.3089	7.8346	G2		626	0.780333	-0.18202	Ⅱ
TCGA_DU_5851_01	4.5815	7.9696	G3		498	-0.960855	-0.926693	Ⅲ
TCGA_DU_5852_01	5.8719	11.7563	G3		558	-1.40797	-0.652723	Ⅲ
TCGA_DU_5853_01	1.5487	8.0819	G2		461	-0.23611	-1.54229	Ⅱ
TCGA_DU_5854_01	7.3743	11.7928	G3		552	5.02309	4.00869	Ⅱ
TCGA_DU_5855_01	2.0186	7.9215	G3		485	-1.1761	-0.899337	Ⅱ
TCGA_DU_5870_01	2.0945	6.99	G2		770	-0.132909	-1.46957	Ⅱ
TCGA_DU_5870_02	4.3796	7.9412	G2		401	0.317329	1.54864	Ⅳ
TCGA_DU_5871_01	2.4085	7.5655	G2		674	-1.01671	-1.46232	Ⅱ
TCGA_DU_5872_01	5.5802	8.2376	G2		746	1.42152	0.820205	Ⅱ
TCGA_DU_5872_02	6.4033	13.4811	G2		404	1.16393	3.22607	Ⅳ
TCGA_DU_5874_01	2.7074	8.1687	G2		405	0.832466	2.15474	Ⅲ
TCGA_DU_6392_01	8.8279	11.9391	G3		489	0	2.01408	Ⅲ
TCGA_DU_6393_01	2.2856	6.723	G3		321	-0.729301	-1.63606	Ⅱ
TCGA_DU_6394_01	4.9602	8.7121	G3		562	1.49796	3.59865	Ⅲ
TCGA_DU_6395_01	0.4324	7.134	G2		548	0.40188	0.663647	Ⅱ
TCGA_DU_6396_01	5.1732	7.9062	G3		365	-0.725439	-1.33778	Ⅱ
TCGA_DU_6397_01	4.5601	7.2655	G3		579	-1.64809	-1.01873	Ⅱ
TCGA_DU_6397_02	6.3716	10.5971	G3		419	3.49643	4.85185	Ⅳ
TCGA_DU_6399_01	2.5903	7.8767	G2		391	0.129034	2.49527	Ⅲ
TCGA_DU_6400_01	2.6952	8.7576	G2		259	0.804341	0.826632	Ⅲ
TCGA_DU_6401_01	4.0505	8.4393	G2		436	1.38071	3.37391	Ⅳ
TCGA_DU_6402_01	5.8201	15.0756	G3		437	0.438932	-0.0758724	Ⅳ
TCGA_DU_6403_01	8.9617	10.9491	G3		402	-0.680837	-1.72015	Ⅱ
TCGA_DU_6404_01	4.7213	10.9505	G3		439	-0.36242	-0.842684	Ⅳ
TCGA_DU_6404_02	3.1009	10.4449	G3		317	-1.38071	-1.49175	Ⅱ
TCGA_DU_6405_01	6.5425	11.2373	G3		635	-1.12987	-1.25152	Ⅱ
TCGA_DU_6406_01	5.6305	12.0587	G3		442	-0.0273886	0	Ⅳ
TCGA_DU_6407_01	1.7466	6.7468	G2		444	-0.187252	-0.263864	Ⅳ
TCGA_DU_6407_02	4.1633	9.7885	G2		291	-2.03389	-0.653859	Ⅱ
TCGA_DU_6408_01	2.617	7.4165	G3		663	-0.402891	-1.54537	Ⅱ
TCGA_DU_6410_01	3.4491	8.0458	G3		451	2.12723	3.06722	Ⅳ
TCGA_DU_6542_01	3.414	7.2548	G3		454	2.2297	3.78536	Ⅳ
TCGA_DU_7006_01	9.2663	13.4822	G3		316	-2.57343	-1.80375	Ⅱ
TCGA_DU_7007_01	5.704	8.9436	G2		623	-1.07558	-2.61175	Ⅱ
TCGA_DU_7008_01	0.8358	6.96	G2		379	-0.197259	0.0882378	Ⅱ
TCGA_DU_7009_01	2.3804	6.0357	G2		462	-2.49381	0.554205	Ⅳ
TCGA_DU_7010_01	6.0466	8.8236	G3		464	3.54422	1.07331	Ⅳ
TCGA_DU_7011_01	2.559	9.0141	G2		505	1.94179	1.81243	Ⅱ
TCGA_DU_7012_01	6.629	12.3012	G3		743	-0.486815	1.3469	Ⅱ
TCGA_DU_7013_01	6.6487	11.1679	G3		331	1.162	0.123934	Ⅲ
TCGA_DU_7014_01	4.8538	8.4989	G2		352	-2.8394	-1.36004	Ⅲ
TCGA_DU_7015_01	2.1869	6.6595	G2		285	-3.25235	-2.68724	Ⅱ
TCGA_DU_7018_01	2.8061	7.6763	G3		418	-1.62174	-0.88458	Ⅱ
TCGA_DU_7019_01	2.7349	8.7581	G3		312	-0.187494	-0.00173569	Ⅱ
TCGA_DU_7290_01	9.1696	11.3617	G3		315	-0.198659	-2.02438	Ⅱ
TCGA_DU_7292_01	5.1365	10.5519	G3		519	-1.0432	-1.55059	Ⅱ
TCGA_DU_7294_01	0.4171	6.7132	G2		522	-0.839435	-0.611111	Ⅱ
TCGA_DU_7298_01	5.7566	8.2183	G3		232	-0.251998	-0.153605	Ⅲ
TCGA_DU_7299_01	1.3821	6.442	G3		504	2.55982	3.44589	Ⅳ
TCGA_DU_7300_01	3.493	8.7851	G3		571	-0.791415	-2.23837	Ⅱ
TCGA_DU_7301_01	2.4623	7.5942	G2		792	-1.04531	-1.1215	Ⅱ
TCGA_DU_7302_01	2.8349	7.1917	G3		512	1.85553	-0.991919	Ⅳ
TCGA_DU_7304_01	2.0609	7.4696	G3		601	-0.61515	-1.22644	Ⅱ
TCGA_DU_7304_02	2.8049	9.0846	G3		191	-1.27938	-1.8672	Ⅱ
TCGA_DU_7306_01	4.4123	6.7865	G2		518	-0.219404	-0.631428	Ⅳ
TCGA_DU_7309_01	1.557	7.5101	G3		434	-0.671798	-0.485234	Ⅱ
TCGA_DU_8158_01	7.7006	11.5311	G3		440	-0.996186	-1.07328	Ⅱ
TCGA_DU_8161_01	3.1488	10.6725	G3		659	-0.333294	-1.16251	Ⅱ
TCGA_DU_8162_01	6.7653	10.0404	G3		527	1.61123	-0.0658274	Ⅳ
TCGA_DU_8163_01	1.1502	6.3266	G3		711	-0.883243	-0.256818	Ⅱ
TCGA_DU_8164_01	0.877	6.4458	G2		530	0.131504	-0.349281	Ⅳ
TCGA_DU_8165_01	3.9321	11.2003	G3		592	-1.12563	-2.81943	Ⅱ
TCGA_DU_8166_01	0.7089	7.4423	G2		415	-2.76839	-1.78081	Ⅱ
TCGA_DU_8167_01	3.4044	7.6931	G2		673	0.316568	-0.83732	Ⅱ
TCGA_DU_8168_01	3.5005	7.0907	G3		547	1.44396	-0.972321	Ⅳ
TCGA_DU_A5TP_01	2.7543	10.4521	G3		357	-1.12277	-1.2525	Ⅱ
TCGA_DU_A5TR_01	6.8957	9.5061	G2		549	-0.881988	-1.95626	Ⅳ
TCGA_DU_A5TS_01	1.1636	7.1282	G2		447	-1.41146	0.595097	Ⅱ
TCGA_DU_A5TT_01	6.0398	11.5985	G3		557	1.04774	1.67702	Ⅳ
TCGA_DU_A5TU_01	5.1579	11.3312	G2		296	-0.25303	-1.76547	Ⅱ
TCGA_DU_A5TW_01	2.439	5.9955	G3		598	-1.57829	-2.57362	Ⅲ
TCGA_DU_A5TY_01	6.8982	11.6914	G3		455	-1.27538	-2.97096	Ⅱ
TCGA_DU_A6S2_01	2.6651	7.5682	G2		570	1.40256	0.0450449	Ⅳ
TCGA_DU_A6S3_01	1.3228	7.2776	G2		500	-0.80419	-0.996204	Ⅱ
TCGA_DU_A6S6_01	0	6.1279	G2		573	1.8557	5.24882	Ⅳ
TCGA_DU_A6S7_01	0	6.4072	G3		575	3.734	3.81249	Ⅳ
TCGA_DU_A6S8_01	2.7445	8.3889	G3		459	0.154134	-0.0548391	Ⅱ
TCGA_DU_A76K_01	3.3753	10.1917	G2		633	2.06583	-2.26055	Ⅱ
TCGA_DU_A76L_01	7.1351	13.907	G3		364	-0.95952	-1.84201	Ⅲ
TCGA_DU_A76O_01	1.5064	8.0633	G2		588	1.73553	1.45316	Ⅳ
TCGA_DU_A76R_01	7.6221	9.5066	G3		441	-1.39488	-1.5393	Ⅱ
TCGA_DU_A7T6_01	6.108	10.3288	G3		736	-1.53322	-1.48551	Ⅱ
TCGA_DU_A7T8_01	4.521	11.8434	G3		662	-1.48795	-1.78619	Ⅱ
TCGA_DU_A7TA_01	2.196	8.0448	G2		593	3.29057	3.82999	Ⅳ
TCGA_DU_A7TB_01	3.8084	10.1978	G2		594	7.02666	2.85537	Ⅳ
TCGA_DU_A7TC_01	3.0056	7.2569	G2		776	-0.881909	-1.72593	Ⅱ
TCGA_DU_A7TD_01	7.1536	11.3902	G3		334	-3.02847	-0.881251	Ⅲ
TCGA_DU_A7TG_01	2.5622	8.8488	G2		597	1.69625	1.31655	Ⅳ
TCGA_DU_A7TI_01	0.9066	7.0224			314	0.0672812	-1.11549	Ⅲ
TCGA_DU_A7TJ_01	5.6071	11.7572	G3		273	-2.1262	-2.15509	Ⅱ
TCGA_E1_5302_01	6.3562	8.3619	G3		604	3.52137	6.35658	Ⅳ
TCGA_E1_5303_01	3.7611	7.4016	G3		606	3.08976	4.14536	Ⅳ
TCGA_E1_5304_01	1.0396	6.0619	G3		609	3.07061	1.00482	Ⅳ
TCGA_E1_5305_01	3.0669	8.591	G3		708	-0.516586	-2.86323	Ⅱ
TCGA_E1_5307_01	1.5061	6.1485	G3		612	-1.33888	0.0262842	Ⅳ
TCGA_E1_5311_01	2.3259	7.0636	G3		753	-1.25143	-3.28747	Ⅱ
TCGA_E1_5318_01	4.4632	9.2969	G2		712	-1.20789	-2.94471	Ⅱ
TCGA_E1_5319_01	5.6894	9.1641	G2		399	-1.02312	-1.63762	Ⅱ
TCGA_E1_5322_01	1.9605	6.926	G2		628	1.28249	6.17923	Ⅳ
TCGA_E1_A7YD_01	8.6976	10.8407			615	-0.816654	-2.58297	Ⅱ
TCGA_E1_A7YE_01	10.4629	7.9919			528	-1.03451	-2.43789	Ⅱ
TCGA_E1_A7YH_01	4.1856	6.8488			566	-0.70761	-2.70451	Ⅱ
TCGA_E1_A7YI_01	6.4431	11.4618			640	2.51396	4.30028	Ⅳ
TCGA_E1_A7YJ_01	6.6392	12.0891			646	2.23051	4.63587	Ⅳ
TCGA_E1_A7YK_01	7.7471	9.8806			648	-0.962993	-2.2456	Ⅱ
TCGA_E1_A7YL_01	7.1712	12.0414			649	2.21397	-0.019083	Ⅳ
TCGA_E1_A7YM_01	6.7404	10.1747			654	3.4128	3.41011	Ⅳ
TCGA_E1_A7YN_01	11.7304	12.2725			469	-1.50207	-1.94736	Ⅱ
TCGA_E1_A7YO_01	1.4246	8.0996	G3		544	-1.43652	-1.80324	Ⅱ
TCGA_E1_A7YQ_01	6.0966	12.2585			639	-0.869688	-2.17372	Ⅱ
TCGA_E1_A7YS_01	3.1151	5.6411			664	-0.630987	-0.875766	Ⅳ
TCGA_E1_A7YU_01	4.5153	6.9831			403	-1.10391	0.271485	Ⅲ
TCGA_E1_A7YV_01	4.2913	9.0847	G3		411	-1.34897	-2.36639	Ⅱ
TCGA_E1_A7YW_01	1.5047	6.1832	G2		590	-1.195	-0.740369	Ⅱ
TCGA_E1_A7YY_01	1.8757	10.4121			378	-1.50076	-2.79445	Ⅱ
TCGA_E1_A7Z2_01	3.594	10.2625			680	2.08679	1.45625	Ⅳ
TCGA_E1_A7Z3_01	5.5614	9.8314			683	4.08642	4.71382	Ⅳ
TCGA_E1_A7Z4_01	0.8777	7.2732			684	1.04805	3.03215	Ⅳ
TCGA_E1_A7Z6_01	2.3877	7.8952	G2		446	-0.972392	-1.44234	Ⅱ
TCGA_EZ_7264_01	0.8789	6.0721	G2		281	-1.03588	-2.26322	Ⅱ
TCGA_F6_A8O3_01	0.6229	6.2074	G2		693	1.58398	3.25047	Ⅳ
TCGA_F6_A8O4_01	0.4093	7.1797	G2		699	4.08109	3.53033	Ⅳ
TCGA_FG_5962_01	4.0492	7.8646	G3		700	3.12815	5.08754	Ⅳ
TCGA_FG_5963_01	6.4181	10.9111	G3		583	-1.14159	-1.82325	Ⅱ
TCGA_FG_5963_02	8.2059	12.5571	G3		709	1.18096	2.57211	Ⅳ
TCGA_FG_5964_01	3.8995	9.3499	G2		253	-1.97515	-2.45499	Ⅱ
TCGA_FG_5965_01	4.0612	8.088	G2		671	-1.58777	-2.2745	Ⅱ
TCGA_FG_5965_02	4.25395	8.93575	G2		713	0.12	0.84989	Ⅳ
TCGA_FG_6688_01	8.6489	11.0645	G3		714	1.69189	-0.478528	Ⅳ
TCGA_FG_6689_01	2.2999	6.9763	G2		398	-0.90304	-1.705	Ⅱ
TCGA_FG_6690_01	1.161	7.326	G2		719	-0.964587	-0.105021	Ⅳ
TCGA_FG_6691_01	1.9262	7.1577	G2		729	1.31801	3.35792	Ⅳ
TCGA_FG_6692_01	6.1167	13.1186	G3		734	4.60188	1.71234	Ⅳ
TCGA_FG_7634_01	4.6164	9.6624	G2		482	-0.910305	-0.570011	Ⅱ
TCGA_FG_7636_01	1.1887	6.8912	G3		741	2.13274	1.59822	Ⅳ
TCGA_FG_7637_01	5.0408	8.0178	G2		490	-1.32438	-1.86645	Ⅲ
TCGA_FG_7638_01	1.4513	7.1403	G3		514	-1.4643	-1.79891	Ⅱ
TCGA_FG_7641_01	1.4246	5.9159	G2		395	-0.951184	-2.03385	Ⅱ
TCGA_FG_7643_01	5.8561	9.6124	G2		764	3.04957	2.57946	Ⅳ
TCGA_FG_8181_01	1.747	9.1066	G3		348	-2.45463	-2.46353	Ⅱ
TCGA_FG_8182_01	0.7526	5.5403	G2		672	-1.17717	-2.8458	Ⅱ
TCGA_FG_8185_01	1.6341	7.429	G3		775	1.44666	3.53654	Ⅳ
TCGA_FG_8186_01	3.1576	7.4985	G3		543	-1.77845	-1.65332	Ⅱ
TCGA_FG_8187_01	2.1224	6.6908	G2		778	0.969441	-1.29503	Ⅳ
TCGA_FG_8188_01	1.5749	6.7533	G2		589	-1.71935	-0.24964	Ⅱ
TCGA_FG_8189_01	2.5888	6.8455	G2		407	-0.839159	-1.51624	Ⅱ
TCGA_FG_8191_01	2.6899	7.8179	G3		798	3.69958	1.18028	Ⅳ
TCGA_FG_A4MT_01	1.8561	7.7628	G2		822	-1.36576	-2.16196	Ⅳ
TCGA_FG_A4MT_02	4.2742	9.2568	G2
TCGA_FG_A4MU_01	6.8222	12.3785	G3
TCGA_FG_A4MW_01	6.9785	11.3294	G3
TCGA_FG_A4MX_01	2.3266	8.4024	G2
TCGA_FG_A4MY_01	4.1496	8.4149	G2
TCGA_FG_A60J_01	1.8089	7.4164	G2
TCGA_FG_A60K_01	0.5093	5.3355	G2
TCGA_FG_A60L_01	2.037	8.3413	G2
TCGA_FG_A6IZ_01	0	7.6165	G2
TCGA_FG_A6J1_01	1.5927	9.1344	G2
TCGA_FG_A6J3_01	6.949	11.9928	G3
TCGA_FG_A70Y_01	3.0938	7.1929	G2
TCGA_FG_A70Z_01	6.8581	11.8606	G3
TCGA_FG_A710_01	1.7902	9.4093	G2
TCGA_FG_A711_01	0	6.8293	G2
TCGA_FG_A713_01	1.6581	8.1403	G2
TCGA_FG_A87N_01	6.0749	9.7702	G3
TCGA_FG_A87Q_01	6.8959	11.0135	G3
TCGA_FN_7833_01	1.9882	9.0476	G3
TCGA_HT_7467_01	4.1941	8.0646	G2
TCGA_HT_7468_01	1.5509	6.9186	G3
TCGA_HT_7469_01	3.2918	8.9768	G3
TCGA_HT_7470_01	3.3208	7.1365	G3
TCGA_HT_7471_01	2.5004	9.9281	G3
TCGA_HT_7472_01	1.003	6.6255	G2
TCGA_HT_7473_01	4.9216	7.4177	G2
TCGA_HT_7474_01	4.5248	7.8941	G2
TCGA_HT_7475_01	0.4115	7.3139	G3
TCGA_HT_7476_01	5.105	11.2536	G2
TCGA_HT_7477_01	3.5259	8.0339	G3
TCGA_HT_7478_01	3.8413	8.753	G2
TCGA_HT_7479_01	1.8689	6.6909	G3
TCGA_HT_7480_01	0.3807	6.5317	G2
TCGA_HT_7481_01	2.2756	7.486	G2
TCGA_HT_7482_01	2.4742	6.408	G2
TCGA_HT_7483_01	1.6659	8.4518	G2
TCGA_HT_7485_01	0.7912	6.0526	G2
TCGA_HT_7601_01	4.1138	8.6127	G3
TCGA_HT_7602_01	1.6465	7.0142	G2
TCGA_HT_7603_01	2.7033	7.3557	G2
TCGA_HT_7604_01	1.8562	5.5901	G2
TCGA_HT_7605_01	1.5869	6.8591	G2
TCGA_HT_7606_01	3.3148	9.4022	G2
TCGA_HT_7607_01	4.8213	8.2158	G2
TCGA_HT_7608_01	4.3048	8.7272	G2
TCGA_HT_7609_01	1.3541	6.4557	G3
TCGA_HT_7610_01	0	5.701	G2
TCGA_HT_7611_01	2.9098	5.7396	G2
TCGA_HT_7616_01	8.4191	10.5976	G3
TCGA_HT_7620_01	3.825	6.823	G3
TCGA_HT_7676_01	1.1378	7.0384	G2
TCGA_HT_7677_01	1.2968	6.9019	G3
TCGA_HT_7680_01	11.4299	10.659	G2
TCGA_HT_7681_01	2.6634	7.4202	G2
TCGA_HT_7684_01	8.3201	9.492	G3
TCGA_HT_7686_01	7.1474	7.745	G3
TCGA_HT_7687_01	3.9579	7.9655	G3
TCGA_HT_7688_01	1.5424	6.8379	G3
TCGA_HT_7689_01	3.1424	7.2876	G2
TCGA_HT_7690_01	5.6577	9.2594	G3
TCGA_HT_7691_01	8.1536	12.1633	G2
TCGA_HT_7692_01	0.4652	7.6819	G2
TCGA_HT_7693_01	6.6976	8.6114	G2
TCGA_HT_7694_01	3.5266	7.3816	G3
TCGA_HT_7695_01	0.5922	6.3203	G2
TCGA_HT_7854_01	6.1434	9.5094	G2
TCGA_HT_7855_01	2.8187	6.3799	G3
TCGA_HT_7856_01	4.5515	7.6722	G3
TCGA_HT_7857_01	6.5862	13.4633	G3
TCGA_HT_7858_01	2.4867	7.453	G2
TCGA_HT_7860_01	4.6722	10.5541	G3
TCGA_HT_7873_01	2.2009	5.9427	G2
TCGA_HT_7874_01	2.5914	7.1369	G3
TCGA_HT_7875_01	0.9469	6.5027	G2
TCGA_HT_7877_01	2.5	6.9354	G2
TCGA_HT_7879_01	2.7304	7.612	G3
TCGA_HT_7880_01	2.6031	7.6318	G2
TCGA_HT_7881_01	3.6454	7.4006	G2
TCGA_HT_7882_01	6.5482	14.9956	G3
TCGA_HT_7884_01	1.8402	6.3914	G2
TCGA_HT_7902_01	3.8805	7.984	G2
TCGA_HT_8010_01	3.3133	7.2166	G2
TCGA_HT_8011_01	5.9112	11.1632	G3
TCGA_HT_8012_01	1.9307	6.5226	G2
TCGA_HT_8013_01	3.3719	8.4625	G2
TCGA_HT_8015_01	9.4086	11.4835	G2
TCGA_HT_8018_01	5.5033	12.0907	G2
TCGA_HT_8019_01	1.1932	8.0648	G3
TCGA_HT_8104_01	8.3001	11.0168	G3
TCGA_HT_8105_01	4.3276	8.5583	G3
TCGA_HT_8106_01	9.0026	10.5751	G3
TCGA_HT_8107_01	3.8571	7.7444	G2
TCGA_HT_8108_01	1.6987	7.0282	G2
TCGA_HT_8109_01	2.3445	7.3816	G3
TCGA_HT_8110_01	7.4455	10.679	G3
TCGA_HT_8111_01	4.08	6.5161	G3
TCGA_HT_8113_01	2.3277	6.8939	G2
TCGA_HT_8114_01	4.1249	10.1705	G3
TCGA_HT_8558_01	2.3926	7.4653	G2
TCGA_HT_8563_01	6.525	9.112	G3
TCGA_HT_8564_01	3.7295	10.7502	G3
TCGA_HT_A4DS_01	6.1025	13.0421	G3
TCGA_HT_A4DV_01	2.3219	8.0056	G3
TCGA_HT_A5R5_01	4.7908	9.2934	G2
TCGA_HT_A5R7_01	3.3358	7.0619	G3
TCGA_HT_A5R9_01	1.7021	9.008	G3
TCGA_HT_A5RA_01	6.8459	12.4257	G3
TCGA_HT_A5RB_01	0.97	6.804	G2
TCGA_HT_A5RC_01	7.5441	12.3384	G3
TCGA_HT_A614_01	1.7819	7.4238	G2
TCGA_HT_A615_01	3.687	7.2239	G2
TCGA_HT_A616_01	0.5667	7.5144	G2
TCGA_HT_A617_01	6.8857	12.851	G2
TCGA_HT_A618_01	5.5361	8.3675	G3
TCGA_HT_A619_01	4.9903	8.6303	G3
TCGA_HT_A61A_01	2.959	8.6794	G2
TCGA_HT_A61B_01	2.3209	9.7381	G3
TCGA_HT_A61C_01	7.5693	12.7374	G3
TCGA_HT_A74H_01	8.1933	11.0578	G3
TCGA_HT_A74J_01	6.3637	7.672	G2
TCGA_HT_A74K_01	4.6555	11.5796	G3
TCGA_HT_A74L_01	3.6677	5.8959	G2
TCGA_HT_A74O_01	4.4611	8.9192	G3
TCGA_HW_7486_01	2.9546	7.3333	G2
TCGA_HW_7487_01	2.3403	7.0439	G2
TCGA_HW_7489_01	2.4664	7.5783	G2
TCGA_HW_7490_01	2.7877	8.8346	G2
TCGA_HW_7491_01	2.1634	7.3926	G2
TCGA_HW_7493_01	2.958	8.2911	G2
TCGA_HW_7495_01	1.8821	6.6659	G2
TCGA_HW_8319_01	3.1039	6.5605	G3
TCGA_HW_8320_01	1.6321	6.7228	G3
TCGA_HW_8321_01	5.2191	7.131	G3
TCGA_HW_8322_01	0.9078	7.0266	G2
TCGA_HW_A5KJ_01	3.4522	9.3584	G3
TCGA_HW_A5KK_01	7.5072	11.4958	G3
TCGA_HW_A5KL_01	1.7389	6.372	G2
TCGA_HW_A5KM_01	2.5821	8.5133	G2
TCGA_IK_7675_01	3.1598	6.8767	G2
TCGA_IK_8125_01	1.3467	7.4871	G3
TCGA_KT_A74X_01	1.2839	8.1335	G3
TCGA_KT_A7W1_01	5.4412	12.2746	G3
TCGA_P5_A5ET_01	0.8404	6.4126	G2
TCGA_P5_A5EU_01	4.4154	9.9437	G3
TCGA_P5_A5EV_01	0.4881	6.6788	G2
TCGA_P5_A5EW_01	0.8703	4.9835	G2
TCGA_P5_A5EX_01	6.5977	11.3326	G3
TCGA_P5_A5EY_01	5.81	10.653	G2
TCGA_P5_A5EZ_01	3.7883	8.2561	G3
TCGA_P5_A5F0_01	0.9287	6.937	G2
TCGA_P5_A5F1_01	3.0768	7.9596	G2
TCGA_P5_A5F2_01	1.5475	8.2198	G2
TCGA_P5_A5F4_01	2.5866	7.7447	G3
TCGA_P5_A5F6_01	4.7531	12.2266	G2
TCGA_P5_A72U_01	7.6875	12.704	G3
TCGA_P5_A72W_01	3.4088	6.6104	G3
TCGA_P5_A72X_01	3.7792	8.8357	G3
TCGA_P5_A72Z_01	1.9085	8.1161	G3
TCGA_P5_A730_01	2.5243	8.1986	G3
TCGA_P5_A731_01	6.2003	11.8082	G2
TCGA_P5_A733_01	4.0515	8.3563	G2
TCGA_P5_A735_01	1.4454	5.5176
TCGA_P5_A736_01	5.8449	9.161
TCGA_P5_A737_01	0	9.0069
TCGA_P5_A77W_01	0.4778	6.5733
TCGA_P5_A77X_01	0.4935	6.7144
TCGA_P5_A780_01	5.4953	8.3851
TCGA_P5_A781_01	0.8563	6.6242
TCGA_QH_A65R_01	3.0811	8.5837	G3
TCGA_QH_A65S_01	1.5039	7.5041	G2
TCGA_QH_A65V_01	2.8443	7.8733	G2
TCGA_QH_A65X_01	3.9789	10.7145	G3
TCGA_QH_A65Z_01	1.209	6.4086	G2
TCGA_QH_A6CS_01	7.0835	10.4404	G3
TCGA_QH_A6CU_01	6.3619	7.9351	G3
TCGA_QH_A6CV_01	2.6878	11.912	G3
TCGA_QH_A6CW_01	2.7146	7.274	G3
TCGA_QH_A6CX_01	6.1597	12.0829	G2
TCGA_QH_A6CY_01	2.3038	7.0499	G3
TCGA_QH_A6CZ_01	0	5.9904	G2
TCGA_QH_A6X3_01	1.1893	5.955	G2
TCGA_QH_A6X4_01	2.0246	5.9629	G3
TCGA_QH_A6X5_01	2.4086	6.857	G2
TCGA_QH_A6X8_01	1.7579	7.4601	G3
TCGA_QH_A6X9_01	1.759	6.8008	G2
TCGA_QH_A6XA_01	1.4764	6.6493	G2
TCGA_QH_A6XC_01	6.34	11.4466	G3
TCGA_QH_A86X_01	1.0758	6.459	G2
TCGA_QH_A870_01	0.5266	5.7862	G3
TCGA_R8_A6MK_01	2.1989	6.6775	G2
TCGA_R8_A6ML_01	2.9435	7.8939	G3
TCGA_R8_A6MO_01	3.7561	8.5733	G2
TCGA_R8_A6YH_01	2.072	6.4648
TCGA_R8_A73M_01	0	7.0817	G2
TCGA_RY_A83X_01	1.2214	7.1309	G2
TCGA_RY_A83Y_01	1.624	7.8652
TCGA_RY_A83Z_01	2.7049	7.8254
TCGA_RY_A840_01	0.8759	6.4975	G3
TCGA_RY_A843_01	1.7243	6.8748
TCGA_RY_A845_01	0.7817	6.2441
TCGA_RY_A847_01	1.5797	7.3541
TCGA_S9_A6TS_01	1.2159	8.0384	G3
TCGA_S9_A6TU_01	1.942	7.3572	G2
TCGA_S9_A6TV_01	7.2449	10.4183	G3
TCGA_S9_A6TW_01	6.084	9.3426	G3
TCGA_S9_A6TX_01	1.9515	6.9483	G3
TCGA_S9_A6TY_01	1.1496	6.8523	G2
TCGA_S9_A6TZ_01	2.9822	7.8745	G2
TCGA_S9_A6U0_01	8.9829	12.4775	G3
TCGA_S9_A6U1_01	1.3753	6.5768	G3
TCGA_S9_A6U2_01	0.9609	7.686	G2
TCGA_S9_A6U5_01	2.3839	7.875	G2
TCGA_S9_A6U6_01	0.4867	7.0019	G3
TCGA_S9_A6U8_01	2.0749	6.9226	G2
TCGA_S9_A6U9_01	4.1593	8.5963	G3
TCGA_S9_A6UA_01	7.0733	13.8617	G3
TCGA_S9_A6UB_01	0.9054	5.5362	G2
TCGA_S9_A6WD_01	2.464	6.243	G3
TCGA_S9_A6WE_01	2.3351	6.5962	G2
TCGA_S9_A6WG_01	3.6202	13.0345	G3
TCGA_S9_A6WH_01	3.6285	6.5064	G2
TCGA_S9_A6WI_01	1.7802	7.6309	G2
TCGA_S9_A6WL_01	5.8755	9.9143	G3
TCGA_S9_A6WM_01	6.1612	11.8011	G3
TCGA_S9_A6WN_01	7.4636	9.1632	G3
TCGA_S9_A6WO_01	1.7364	5.5017	G2
TCGA_S9_A6WP_01	2.3721	8.4446	G3
TCGA_S9_A6WQ_01	2.2537	7.9252	G2
TCGA_S9_A7IQ_01	0.4227	7.1592	G2
TCGA_S9_A7IS_01	3.8228	10.7862	G3
TCGA_S9_A7IX_01	6.5187	12.0278	G3
TCGA_S9_A7IY_01	2.9161	7.1712	G3
TCGA_S9_A7IZ_01	6.1928	7.5028	G3
TCGA_S9_A7J0_01	3.8498	7.072	G3
TCGA_S9_A7J1_01	0.5956	6.4149	G2
TCGA_S9_A7J2_01	0	6.3998	G3
TCGA_S9_A7J3_01	3.0839	7.6893	G3
TCGA_S9_A7QW_01	0.8979	5.3925	G3
TCGA_S9_A7QX_01	1.5068	6.9373	G3
TCGA_S9_A7QY_01	3.2299	7.8017	G2
TCGA_S9_A7QZ_01	1.5654	7.7081	G2
TCGA_S9_A7R1_01	1.0271	7.864	G2
TCGA_S9_A7R2_01	8.307	10.5077	G3
TCGA_S9_A7R3_01	1.9804	6.5887	G2
TCGA_S9_A7R4_01	2.3758	8.6935	G3
TCGA_S9_A7R7_01	9.1266	9.8752	G2
TCGA_S9_A7R8_01	1.8465	6.7751	G3
TCGA_S9_A89V_01	4.7295	11.2586	G3
TCGA_S9_A89Z_01	6.6445	8.8284	G3
TCGA_TM_A7C3_01	4.1531	12.1586	G3
TCGA_TM_A7C4_01	2.7739	8.9439	G2
TCGA_TM_A7C5_01	0.6569	6.932	G2
TCGA_TM_A7CA_01	0.963	6.2114	G2
TCGA_TM_A7CF_01	0	7.1132	G2
TCGA_TM_A7CF_02	1.9327	7.2001	G2
TCGA_TM_A84B_01	2.6145	10.365	G3
TCGA_TM_A84C_01	6.0883	12.7449	G2
TCGA_TM_A84F_01	2.7626	8.4909	G3
TCGA_TM_A84G_01	0	6.598	G3
TCGA_TM_A84H_01	2.2101	5.22	G3
TCGA_TM_A84I_01	4.6521	6.6538	G3
TCGA_TM_A84J_01	6.4489	11.6352	G3
TCGA_TM_A84L_01	2.1288	7.1664	G2
TCGA_TM_A84M_01	0.4995	6.556	G3
TCGA_TM_A84O_01	1.7137	7.3108	G3
TCGA_TM_A84Q_01	3.2237	6.9385	G2
TCGA_TM_A84R_01	1.9279	7.8766	G2
TCGA_TM_A84S_01	1.8954	7.2605	G3
TCGA_TM_A84T_01	0	6.4921	G2
TCGA_TQ_A7RF_01	0.9279	7.008
TCGA_TQ_A7RG_01	1.7906	7.3517
TCGA_TQ_A7RH_01	1.5391	6.8924
TCGA_TQ_A7RI_01	2.3707	6.7126
TCGA_TQ_A7RJ_01	1.8238	6.5806
TCGA_TQ_A7RK_01	2.3056	6.1785
TCGA_TQ_A7RK_02	1.54005	6.6323
TCGA_TQ_A7RM_01	1.3365	8.9451
TCGA_TQ_A7RN_01	1.1753	6.441
TCGA_TQ_A7RO_01	0.5385	7.0517
TCGA_TQ_A7RP_01	14.1602	10.2806
TCGA_TQ_A7RQ_01	1.2066	6.208
TCGA_TQ_A7RR_01	3.1902	7.1942
TCGA_TQ_A7RS_01	1.5332	6.2837
TCGA_TQ_A7RU_01	1.18	7.5669
TCGA_TQ_A7RV_01	2.3787	7.1371
TCGA_TQ_A7RV_02	4.4054	8.7245
TCGA_TQ_A7RW_01	3.9103	6.242
TCGA_TQ_A8XE_01	1.8328	5.9228
TCGA_TQ_A8XE_02	2.0474	8.1063
TCGA_VM_A8C8_01	0	6.0872	G2
TCGA_VM_A8C9_01	11.1418	13.7897	G2
TCGA_VM_A8CA_01	3.53	10.8149	G2
TCGA_VM_A8CB_01	1.2762	6.6584	G3
TCGA_VM_A8CD_01	6.2296	12.4384	G3
TCGA_VM_A8CE_01	1.1382	7.3952	G2
TCGA_VM_A8CF_01	4.3672	8.5647
TCGA_VM_A8CH_01	1.7475	7.5561	G2
TCGA_VV_A829_01	3.9336	8.8493	G3
TCGA_VV_A86M_01	4.7371	7.9938	G3
TCGA_VW_A7QS_01	7.313	10.5134	G3
TCGA_VW_A8FI_01	5.3124	12.299	G3
TCGA_W9_A837_01	1.0702	6.7554	G2
TCGA_WH_A86K_01	2.3804	8.2388	G2
TCGA_WY_A858_01	4.2883	8.8558	G3
TCGA_WY_A859_01	1.1967	6.8297	G2
TCGA_WY_A85A_01	0	6.839	G2
TCGA_WY_A85B_01	1.656	6.8241
TCGA_WY_A85C_01	3.434	8.0543
TCGA_WY_A85D_01	1.7931	6.0571
TCGA_WY_A85E_01	0	7.2321

## Sheet: Rawdata of Figure 5
Sample ID	SERPINA5 mRNA expression	SERPINA5_cg15509705	TIMP1 mRNA expression	TIMP1_cg27151711	TIMP1_cg16523424	TIMP1_cg04791822
TCGA_CS_4938_01	2.9473	0.6167	6.2577	0.7993	0.7417	0.9381
TCGA_CS_4941_01	5.5513	0.1468	11.0219	0.0327	0.0889	0.113
TCGA_CS_4942_01	2.459	0.5043	7.2401	0.7877	0.4841	0.9058
TCGA_CS_4943_01	1.2043	0.4156	7.1148	0.9636	0.9283	0.9257
TCGA_CS_4944_01	5.352	0.602	8.4112	0.8106	0.7369	0.8978
TCGA_CS_5390_01	2.6953	0.5772	7.1077	0.9424	0.8572	0.9373
TCGA_CS_5393_01	1.9352	0.4709	7.1188	0.8666	0.7842	0.8684
TCGA_CS_5394_01	1.7407	0.5166	7.0963	0.9586	0.9086	0.9394
TCGA_CS_5395_01	2.2335	0.2533	10.0949	0.0301	0.0943	0.0816
TCGA_CS_5396_01	4.6574	0.3403	8.1285	0.9289	0.8544	0.9302
TCGA_CS_5397_01	8.9084	0.4069	11.5684	0.6443	0.5506	0.7316
TCGA_CS_6186_01	2.5738	0.3476	9.9738	0.0327	0.059	0.0788
TCGA_CS_6188_01	7.6691	0.1423	12.0773	0.0508	0.0754	0.0888
TCGA_CS_6290_01	4.1893	0.4946	7.4525	0.7042	0.7387	0.8273
TCGA_CS_6665_01	7.0238	0.427	9.3556	0.853	0.7248	0.9225
TCGA_CS_6666_01	3.4498	0.4831	8.8918	0.9595	0.9452	0.9325
TCGA_CS_6667_01	3.0776	0.5796	7.5636	0.669	0.5745	0.7557
TCGA_CS_6668_01	0.7499	0.5017	5.9061	0.982	0.9305	0.9597
TCGA_CS_6669_01	0.9338	0.2519	7.5897	0.2487	0.35	0.5455
TCGA_CS_6670_01	0.4603	0.5372	7.637	0.9281	0.8837	0.9269
TCGA_DB_5270_01	3.5741	0.4673	8.9334	0.6038	0.478	0.8105
TCGA_DB_5273_01	3.9927	0.5353	8.3988	0.7965	0.762	0.8844
TCGA_DB_5274_01	4.4002	0.6221	11.1013	0.8905	0.7828	0.9195
TCGA_DB_5275_01	1.9997	0.6472	7.9616	0.9253	0.889	0.9389
TCGA_DB_5276_01	4.2003	0.4102	7.875	0.574	0.5599	0.733
TCGA_DB_5277_01	1.4621	0.4358	7.2506	0.9325	0.8893	0.9179
TCGA_DB_5278_01	0.6958	0.3518	6.7203	0.8193	0.7743	0.8614
TCGA_DB_5279_01	2.915	0.4096	6.9311	0.9524	0.8888	0.9457
TCGA_DB_5280_01	0.7671	0.4624	6.7316	0.9385	0.906	0.9153
TCGA_DB_5281_01	3.7727	0.4967	8.406	0.866	0.8736	0.8962
TCGA_DB_A4X9_01	1.0309	0.6709	5.8015	0.9366	0.5419	0.9406
TCGA_DB_A4XA_01	0.6343	0.2223	7.6343	0.8457	0.791	0.914
TCGA_DB_A4XB_01	1.3819	0.6323	5.4182	0.9573	0.89	0.9248
TCGA_DB_A4XC_01	1.8289	0.5456	7.6446	0.8361	0.7826	0.8294
TCGA_DB_A4XD_01	1.7613	0.6223	6.3453	0.9262	0.9032	0.9104
TCGA_DB_A4XE_01	1.2462	0.6271	7.352	0.9322	0.7789	0.9157
TCGA_DB_A4XF_01	5.418	0.435	8.0201	0.9273	0.8433	0.9296
TCGA_DB_A4XG_01	0	0.4827	6.328	0.9701	0.9134	0.9196
TCGA_DB_A4XH_01	1.9107	0.1999	7.6849	0.9187	0.7868	0.9283
TCGA_DB_A64L_01	3.152	0.1912	8.2304	0.872	0.7623	0.9223
TCGA_DB_A64O_01	6.1579	0.1734	10.5809	0.0481	0.0877	0.1454
TCGA_DB_A64P_01	4.2565	0.5326	8.0133	0.9235	0.8922	0.902
TCGA_DB_A64Q_01	1.1575	0.42	6.076	0.8905	0.8183	0.9346
TCGA_DB_A64R_01	0	0.7301	6.0427	0.6564	0.5795	0.9473
TCGA_DB_A64S_01	4.147	0.1778	8.2449	0.8583	0.8164	0.8822
TCGA_DB_A64U_01	2.2738	0.5389	6.2943	0.8756	0.759	0.9222
TCGA_DB_A64V_01	3.3918	0.4459	8.7613	0.7442	0.641	0.8035
TCGA_DB_A64W_01	2.1866	0.6885	7.1742	0.9432	0.8829	0.9403
TCGA_DB_A64X_01	2.1797	0.4562	7.9432	0.7644	0.5773	0.9353
TCGA_DB_A75K_01	2.865	0.6627	10.5121	0.7978	0.4794	0.9194
TCGA_DB_A75L_01	1.1355	0.3972	7.3092	0.8624	0.8382	0.912
TCGA_DB_A75M_01	2.041	0.4656	7.1595	0.9305	0.8698	0.8974
TCGA_DB_A75O_01	4.0735	0.5469	7.5096	0.8309	0.8586	0.9007
TCGA_DB_A75P_01	8.5428	0.2252	13.1142	0.2714	0.2151	0.5186
TCGA_DH_5140_01	3.6254	0.2894	11.644	0.6965	0.5528	0.9041
TCGA_DH_5141_01	4.004	0.4414	8.4326	0.8478	0.7663	0.8856
TCGA_DH_5142_01	4.2292	0.4954	7.9549	0.878	0.8507	0.8856
TCGA_DH_5143_01	1.6975	0.6155	7.6857	0.8283	0.8271	0.9308
TCGA_DH_5144_01	0	0.5216	6.678	0.963	0.9089	0.964
TCGA_DH_A669_01	4.8027	0.4268	8.811	0.975	0.9218	0.9223
TCGA_DH_A669_02	3.5413	0.3418	10.6283	0.9697	0.8816	0.9101
TCGA_DH_A66B_01	3.617	0.3859	7.749	0.8434	0.8662	0.8438
TCGA_DH_A66D_01	2.9899	0.618	7.2465	0.9116	0.5208	0.9303
TCGA_DH_A66F_01	3.5124	0.5916	7.1927	0.9423	0.913	0.9361
TCGA_DH_A66G_01	5.1794	0.5857	8.9881	0.8348	0.5566	0.8976
TCGA_DH_A7UR_01	3.2163	0.3278	9.5473	0.819	0.6156	0.8879
TCGA_DH_A7US_01	1.5935	0.4335	6.7914	0.8768	0.7617	0.8703
TCGA_DH_A7UT_01	3.715	0.369	7.683	0.8503	0.7754	0.8806
TCGA_DH_A7UU_01	3.5686	0.1516	6.5941	0.9352	0.8752	0.9336
TCGA_DH_A7UV_01	0.4658	0.6347	6.4132	0.9216	0.9127	0.8912
TCGA_DU_5847_01	4.5891	0.165	11.5453	0.3514	0.1859	0.682
TCGA_DU_5849_01	2.3089	0.4956	7.8346	0.784	0.7246	0.7359
TCGA_DU_5851_01	4.5815	0.4257	7.9696	0.7787	0.5349	0.8384
TCGA_DU_5852_01	5.8719	0.1087	11.7563	0.633	0.4265	0.5639
TCGA_DU_5853_01	1.5487	0.5941	8.0819	0.911	0.891	0.7058
TCGA_DU_5854_01	7.3743	0.2395	11.7928	0.5528	0.4174	0.6284
TCGA_DU_5855_01	2.0186	0.5156	7.9215	0.8788	0.7741	0.9225
TCGA_DU_5870_01	2.0945	0.5217	6.99	0.846	0.7493	0.903
TCGA_DU_5870_02	4.3796	0.475	7.9412	0.8457	0.4931	0.9204
TCGA_DU_5871_01	2.4085	0.3568	7.5655	0.9035	0.7824	0.9303
TCGA_DU_5872_01	5.5802	0.6185	8.2376	0.8335	0.5616	0.9044
TCGA_DU_5872_02	6.4033	0.163	13.4811	0.3304	0.3155	0.6512
TCGA_DU_5874_01	2.7074	0.7497	8.1687	0.9786	0.9247	0.944
TCGA_DU_6392_01	8.8279	0.1014	11.9391	0.6347	0.5081	0.7183
TCGA_DU_6393_01	2.2856	0.721	6.723	0.9735	0.9359	0.8964
TCGA_DU_6394_01	4.9602	0.2662	8.7121	0.9641	0.9112	0.9267
TCGA_DU_6395_01	0.4324	0.6271	7.134	0.9215	0.8584	0.924
TCGA_DU_6396_01	5.1732	0.4937	7.9062	0.8761	0.7979	0.9268
TCGA_DU_6397_01	4.5601	0.5389	7.2655	0.8571	0.8164	0.8841
TCGA_DU_6397_02	6.3716	0.2171	10.5971	0.9521	0.8851	0.9093
TCGA_DU_6399_01	2.5903	0.4996	7.8767	0.9407	0.9406	0.8729
TCGA_DU_6400_01	2.6952	0.7638	8.7576	0.9678	0.7309	0.934
TCGA_DU_6401_01	4.0505	0.4322	8.4393	0.9027	0.4094	0.9096
TCGA_DU_6402_01	5.8201	0.1275	15.0756	0.0373	0.0554	0.0656
TCGA_DU_6403_01	8.9617	0.0951	10.9491	0.2031	0.2958	0.5563
TCGA_DU_6404_01	4.7213	0.2898	10.9505	0.6213	0.4193	0.6606
TCGA_DU_6404_02	3.1009	0.2019	10.4449	0.43045	0.33345	0.65425
TCGA_DU_6405_01	6.5425	0.8546	11.2373	0.5554	0.3897	0.6142
TCGA_DU_6406_01	5.6305	0.0895	12.0587	0.6049	0.4607	0.6027
TCGA_DU_6407_01	1.7466	0.6569	6.7468	0.9142	0.8739	0.8996
TCGA_DU_6407_02	4.1633	0.4233	9.7885	0.83475	0.7275	0.8926
TCGA_DU_6408_01	2.617	0.5356	7.4165	0.9051	0.8175	0.9018
TCGA_DU_6410_01	3.4491	0.6735	8.0458	0.975	0.9442	0.9528
TCGA_DU_6542_01	3.414	0.5554	7.2548	0.9599	0.9115	0.8723
TCGA_DU_7006_01	9.2663	0.1408	13.4822	0.3751	0.1948	0.6418
TCGA_DU_7007_01	5.704	0.5411	8.9436	0.8493	0.7906	0.7913
TCGA_DU_7008_01	0.8358	0.4664	6.96	0.9146	0.6648	0.9541
TCGA_DU_7009_01	2.3804	0.4106	6.0357	0.9249	0.8375	0.9294
TCGA_DU_7010_01	6.0466	0.2544	8.8236	0.9443	0.8248	0.9236
TCGA_DU_7011_01	2.559	0.3996	9.0141	0.7796	0.7512	0.8676
TCGA_DU_7012_01	6.629	0.1276	12.3012	0.6014	0.4258	0.5961
TCGA_DU_7013_01	6.6487	0.099	11.1679	0.0261	0.0738	0.0732
TCGA_DU_7014_01	4.8538	0.5072	8.4989	0.9025	0.8911	0.9358
TCGA_DU_7015_01	2.1869	0.6745	6.6595	0.899	0.7485	0.9105
TCGA_DU_7018_01	2.8061	0.5575	7.6763	0.9452	0.8712	0.9391
TCGA_DU_7019_01	2.7349	0.537	8.7581	0.8137	0.7884	0.8574
TCGA_DU_7290_01	9.1696	0.1464	11.3617	0.5798	0.4999	0.6424
TCGA_DU_7292_01	5.1365	0.1965	10.5519	0.0368	0.1051	0.0897
TCGA_DU_7294_01	0.4171	0.6718	6.7132	0.9271	0.6477	0.9467
TCGA_DU_7298_01	5.7566	0.5114	8.2183	0.7186	0.6313	0.8987
TCGA_DU_7299_01	1.3821	0.5388	6.442	0.9006	0.86	0.9218
TCGA_DU_7300_01	3.493	0.4516	8.7851	0.7889	0.5226	0.9064
TCGA_DU_7301_01	2.4623	0.6615	7.5942	0.9453	0.8772	0.9225
TCGA_DU_7302_01	2.8349	0.6039	7.1917	0.9203	0.5328	0.9293
TCGA_DU_7304_01	2.0609	0.5431	7.4696	0.8651	0.8333	0.8903
TCGA_DU_7304_02	2.8049	0.1038	9.0846	0.9755	0.9152	0.8739
TCGA_DU_7306_01	4.4123	0.3708	6.7865	0.9206	0.8396	0.9167
TCGA_DU_7309_01	1.557	0.3897	7.5101	0.8316	0.5629	0.9077
TCGA_DU_8158_01	7.7006	0.2879	11.5311	0.4902	0.3761	0.6668
TCGA_DU_8161_01	3.1488	0.3359	10.6725	0.3021	0.2123	0.6396
TCGA_DU_8162_01	6.7653	0.2768	10.0404	0.451	0.3595	0.7576
TCGA_DU_8163_01	1.1502	0.3846	6.3266	0.7801	0.7901	0.8489
TCGA_DU_8164_01	0.877	0.668	6.4458	0.924	0.9053	0.9214
TCGA_DU_8165_01	3.9321	0.2468	11.2003	0.0626	0.0833	0.4823
TCGA_DU_8166_01	0.7089	0.4846	7.4423	0.9259	0.8229	0.9293
TCGA_DU_8167_01	3.4044	0.5601	7.6931	0.8801	0.634	0.9305
TCGA_DU_8168_01	3.5005	0.5838	7.0907	0.9748	0.7862	0.941
TCGA_DU_A5TP_01	2.7543	0.5936	10.4521	0.8737	0.8337	0.8781
TCGA_DU_A5TR_01	6.8957	0.5133	9.5061	0.8154	0.7654	0.8723
TCGA_DU_A5TS_01	1.1636	0.1136	7.1282	0.8083	0.8154	0.8523
TCGA_DU_A5TT_01	6.0398	0.1633	11.5985	0.0321	0.0817	0.0751
TCGA_DU_A5TU_01	5.1579	0.5765	11.3312	0.8764	0.5838	0.9186
TCGA_DU_A5TW_01	2.439	0.5925	5.9955	0.9221	0.8453	0.9323
TCGA_DU_A5TY_01	6.8982	0.105	11.6914	0.424	0.425	0.6965
TCGA_DU_A6S2_01	2.6651	0.319	7.5682	0.8584	0.7407	0.8793
TCGA_DU_A6S3_01	1.3228	0.6047	7.2776	0.8914	0.7523	0.8461
TCGA_DU_A6S6_01	0	0.4501	6.1279	0.8541	0.5287	0.9202
TCGA_DU_A6S7_01	0	0.4505	6.4072	0.8785	0.5426	0.9329
TCGA_DU_A6S8_01	2.7445	0.4422	8.3889	0.9269	0.5146	0.938
TCGA_DU_A76K_01	3.3753	0.2109	10.1917	0.0369	0.0801	0.0844
TCGA_DU_A76L_01	7.1351	0.1368	13.907	0.0409	0.0865	0.1086
TCGA_DU_A76O_01	1.5064	0.5774	8.0633	0.8971	0.8346	0.8415
TCGA_DU_A76R_01	7.6221	0.3897	9.5066	0.9088	0.7871	0.8635
TCGA_DU_A7T6_01	6.108	0.238	10.3288	0.9137	0.7755	0.8845
TCGA_DU_A7T8_01	4.521	0.6008	11.8434	0.934	0.887	0.9124
TCGA_DU_A7TA_01	2.196	0.3679	8.0448	0.9117	0.8737	0.8629
TCGA_DU_A7TB_01	3.8084	0.1905	10.1978	0.0548	0.0845	0.0819
TCGA_DU_A7TC_01	3.0056	0.5294	7.2569	0.8917	0.8305	0.9192
TCGA_DU_A7TD_01	7.1536	0.1208	11.3902	0.0293	0.0723	0.159
TCGA_DU_A7TG_01	2.5622	0.3611	8.8488	0.5164	0.456	0.5682
TCGA_DU_A7TI_01	0.9066	0.5223	7.0224	0.8391	0.7681	0.8358
TCGA_DU_A7TJ_01	5.6071	0.0904	11.7572	0.0235	0.0559	0.0904
TCGA_E1_5302_01	6.3562	0.4465	8.3619	0.855	0.8257	0.8967
TCGA_E1_5303_01	3.7611	0.4949	7.4016	0.8329	0.7502	0.8809
TCGA_E1_5304_01	1.0396	0.7999	6.0619	0.977	0.9593	0.9511
TCGA_E1_5305_01	3.0669	0.6413	8.591	0.9046	0.8881	0.9262
TCGA_E1_5307_01	1.5061	0.627	6.1485	0.8946	0.8546	0.9308
TCGA_E1_5311_01	2.3259	0.6487	7.0636	0.885	0.8337	0.8979
TCGA_E1_5318_01	4.4632	0.6667	9.2969	0.9149	0.8381	0.925
TCGA_E1_5319_01	5.6894	0.5626	9.1641	0.8462	0.7475	0.9365
TCGA_E1_5322_01	1.9605	0.4483	6.926	0.8216	0.7737	0.9005
TCGA_E1_A7YD_01	8.6976	0.0558	10.8407	0.0398	0.0548	0.0919
TCGA_E1_A7YE_01	10.4629	0.1334	7.9919	0.8406	0.7688	0.8927
TCGA_E1_A7YH_01	4.1856	0.5347	6.8488	0.7155	0.5055	0.9331
TCGA_E1_A7YI_01	6.4431	0.109	11.4618	0.1235	0.1822	0.6938
TCGA_E1_A7YJ_01	6.6392	0.2011	12.0891	0.0408	0.1082	0.158
TCGA_E1_A7YK_01	7.7471	0.3898	9.8806	0.7267	0.6323	0.8382
TCGA_E1_A7YL_01	7.1712	0.1049	12.0414	0.0358	0.0721	0.131
TCGA_E1_A7YM_01	6.7404	0.33	10.1747	0.0478	0.1134	0.1138
TCGA_E1_A7YN_01	11.7304	0.104	12.2725	0.3	0.2222	0.4719
TCGA_E1_A7YO_01	1.4246	0.6204	8.0996	0.8933	0.8738	0.8979
TCGA_E1_A7YQ_01	6.0966	0.2839	12.2585	0.6007	0.4903	0.6856
TCGA_E1_A7YS_01	3.1151	0.3946	5.6411	0.9723	0.9481	0.9317
TCGA_E1_A7YU_01	4.5153	0.5442	6.9831	0.8513	0.776	0.8804
TCGA_E1_A7YV_01	4.2913	0.5158	9.0847	0.6563	0.5026	0.7818
TCGA_E1_A7YW_01	1.5047	0.5369	6.1832	0.9022	0.8675	0.9197
TCGA_E1_A7YY_01	1.8757	0.3112	10.4121	0.5818	0.4678	0.8075
TCGA_E1_A7Z2_01	3.594	0.2261	10.2625	0.0454	0.1346	0.6489
TCGA_E1_A7Z3_01	5.5614	0.3636	9.8314	0.7175	0.5725	0.8021
TCGA_E1_A7Z4_01	0.8777	0.6852	7.2732	0.9641	0.9071	0.8971
TCGA_E1_A7Z6_01	2.3877	0.523	7.8952	0.8581	0.5246	0.9042
TCGA_EZ_7264_01	0.8789	0.6127	6.0721	0.9798	0.9187	0.9585
TCGA_F6_A8O3_01	0.6229	0.1886	6.2074	0.897	0.9018	0.9245
TCGA_F6_A8O4_01	0.4093	0.1602	7.1797	0.8614	0.7969	0.8924
TCGA_FG_5962_01	4.0492	0.5354	7.8646	0.9098	0.8748	0.9255
TCGA_FG_5963_01	6.4181	0.1639	10.9111	0.0995	0.1268	0.6507
TCGA_FG_5963_02	8.2059	0.0929	12.5571	0.0445	0.091	0.3482
TCGA_FG_5964_01	3.8995	0.4182	9.3499	0.787	0.6841	0.8458
TCGA_FG_5965_01	4.0612	0.5915	8.088	0.8601	0.7752	0.9184
TCGA_FG_5965_02	4.25395	0.29625	8.93575	0.7179	0.60275	0.84025
TCGA_FG_6688_01	8.6489	0.1511	11.0645	0.5874	0.4816	0.6974
TCGA_FG_6689_01	2.2999	0.5494	6.9763	0.8409	0.7883	0.8688
TCGA_FG_6690_01	1.161	0.6149	7.326	0.9283	0.8731	0.9289
TCGA_FG_6691_01	1.9262	0.2214	7.1577	0.8162	0.8004	0.9226
TCGA_FG_6692_01	6.1167	0.1202	13.1186	0.0424	0.0755	0.0683
TCGA_FG_7634_01	4.6164	0.3566	9.6624	0.9007	0.8526	0.8838
TCGA_FG_7636_01	1.1887	0.6321	6.8912	0.8919	0.8609	0.9013
TCGA_FG_7637_01	5.0408	0.4216	8.0178	0.9521	0.8936	0.9279
TCGA_FG_7638_01	1.4513	0.4609	7.1403	0.8974	0.505	0.9398
TCGA_FG_7641_01	1.4246	0.3415	5.9159	0.8845	0.7709	0.8686
TCGA_FG_7643_01	5.8561	0.2177	9.6124	0.4956	0.4219	0.6899
TCGA_FG_8181_01	1.747	0.2548	9.1066	0.1918	0.2047	0.2269
TCGA_FG_8182_01	0.7526	0.4961	5.5403	0.8786	0.782	0.8298
TCGA_FG_8185_01	1.6341	0.6194	7.429	0.9438	0.8881	0.9133
TCGA_FG_8186_01	3.1576	0.379	7.4985	0.8794	0.8338	0.9352
TCGA_FG_8187_01	2.1224	0.4865	6.6908	0.8198	0.7897	0.8792
TCGA_FG_8188_01	1.5749	0.5131	6.7533	0.9058	0.7963	0.7647
TCGA_FG_8189_01	2.5888	0.3132	6.8455	0.4409	0.3464	0.6797
TCGA_FG_8191_01	2.6899	0.4115	7.8179	0.861	0.7796	0.8793
TCGA_FG_A4MT_01	1.8561	0.6176	7.7628	0.967	0.5531	0.9502
TCGA_FG_A4MT_02	4.2742	0.4617	9.2568	0.8158	0.4873	0.8824
TCGA_FG_A4MU_01	6.8222	0.0765	12.3785	0.0401	0.07	0.1252
TCGA_FG_A4MW_01	6.9785	0.162	11.3294	0.0273	0.0888	0.1132
TCGA_FG_A4MX_01	2.3266	0.5293	8.4024	0.9417	0.8959	0.9164
TCGA_FG_A4MY_01	4.1496	0.4516	8.4149	0.7969	0.7439	0.9246
TCGA_FG_A60J_01	1.8089	0.6404	7.4164	0.773	0.5645	0.9213
TCGA_FG_A60K_01	0.5093	0.6602	5.3355	0.9284	0.8575	0.939
TCGA_FG_A60L_01	2.037	0.4639	8.3413	0.8279	0.7654	0.8532
TCGA_FG_A6IZ_01	0	0.7691	7.6165	0.9726	0.9403	0.9329
TCGA_FG_A6J1_01	1.5927	0.6497	9.1344	0.9103	0.5498	0.9113
TCGA_FG_A6J3_01	6.949	0.3959	11.9928	0.8656	0.4611	0.8006
TCGA_FG_A70Y_01	3.0938	0.3293	7.1929	0.8441	0.7174	0.8953
TCGA_FG_A70Z_01	6.8581	0.1412	11.8606	0.1353	0.1979	0.5886
TCGA_FG_A710_01	1.7902	0.5803	9.4093	0.9179	0.8065	0.8935
TCGA_FG_A711_01	0	0.5652	6.8293	0.8725	0.8268	0.8691
TCGA_FG_A713_01	1.6581	0.4067	8.1403	0.7038	0.4735	0.723
TCGA_FG_A87N_01	6.0749	0.224	9.7702	0.7376	0.6717	0.9109
TCGA_FG_A87Q_01	6.8959	0.1558	11.0135	0.4994	0.3316	0.5992
TCGA_FN_7833_01	1.9882	0.6214	9.0476	0.9255	0.8763	0.9304
TCGA_HT_7467_01	4.1941	0.292	8.0646	0.6309	0.5554	0.6844
TCGA_HT_7468_01	1.5509	0.4808	6.9186	0.9747	0.9299	0.9363
TCGA_HT_7469_01	3.2918	0.078	8.9768	0.0519	0.286	0.5427
TCGA_HT_7470_01	3.3208	0.46	7.1365	0.7803	0.669	0.8321
TCGA_HT_7471_01	2.5004	0.716	9.9281	0.9491	0.914	0.9476
TCGA_HT_7472_01	1.003	0.4512	6.6255	0.8983	0.8245	0.9292
TCGA_HT_7473_01	4.9216	0.5772	7.4177	0.8708	0.8146	0.9223
TCGA_HT_7474_01	4.5248	0.4934	7.8941	0.7477	0.7128	0.87
TCGA_HT_7475_01	0.4115	0.67	7.3139	0.9106	0.8494	0.9371
TCGA_HT_7476_01	5.105	0.369	11.2536	0.7419	0.7577	0.8249
TCGA_HT_7477_01	3.5259	0.1664	8.0339	0.8883	0.8763	0.851
TCGA_HT_7478_01	3.8413	0.4314	8.753	0.7997	0.7352	0.8675
TCGA_HT_7479_01	1.8689	0.4669	6.6909	0.806	0.7538	0.8663
TCGA_HT_7480_01	0.3807	0.5419	6.5317	0.9082	0.8786	0.9165
TCGA_HT_7481_01	2.2756	0.3839	7.486	0.7759	0.6945	0.7677
TCGA_HT_7482_01	2.4742	0.2897	6.408	0.9069	0.8134	0.9018
TCGA_HT_7483_01	1.6659	0.5855	8.4518	0.9074	0.8336	0.9419
TCGA_HT_7485_01	0.7912	0.6443	6.0526	0.9133	0.8234	0.935
TCGA_HT_7601_01	4.1138	0.4819	8.6127	0.7798	0.6802	0.8582
TCGA_HT_7602_01	1.6465	0.3639	7.0142	0.7135	0.6567	0.7575
TCGA_HT_7603_01	2.7033	0.4718	7.3557	0.7704	0.6648	0.8544
TCGA_HT_7604_01	1.8562	0.4194	5.5901	0.9583	0.907	0.8949
TCGA_HT_7605_01	1.5869	0.4107	6.8591	0.8083	0.7678	0.819
TCGA_HT_7606_01	3.3148	0.5435	9.4022	0.9751	0.8978	0.9409
TCGA_HT_7607_01	4.8213	0.4145	8.2158	0.6814	0.5399	0.7962
TCGA_HT_7608_01	4.3048	0.3808	8.7272	0.8711	0.8004	0.9109
TCGA_HT_7609_01	1.3541	0.5207	6.4557	0.9159	0.8426	0.918
TCGA_HT_7610_01	0	0.5219	5.701	0.8254	0.756	0.8771
TCGA_HT_7611_01	2.9098	0.6908	5.7396	0.9392	0.8978	0.9073
TCGA_HT_7616_01	8.4191	0.3996	10.5976	0.8467	0.7668	0.8863
TCGA_HT_7620_01	3.825	0.3471	6.823	0.6986	0.5333	0.7348
TCGA_HT_7676_01	1.1378	0.6563	7.0384	0.8979	0.8731	0.9254
TCGA_HT_7677_01	1.2968	0.4057	6.9019	0.9213	0.8923	0.908
TCGA_HT_7680_01	11.4299	0.1307	10.659	0.4128	0.5307	0.7245
TCGA_HT_7681_01	2.6634	0.4183	7.4202	0.9002	0.4629	0.7407
TCGA_HT_7684_01	8.3201	0.5218	9.492	0.8892	0.8308	0.8873
TCGA_HT_7686_01	7.1474	0.3495	7.745	0.8348	0.7312	0.9026
TCGA_HT_7687_01	3.9579	0.4715	7.9655	0.8935	0.8646	0.9153
TCGA_HT_7688_01	1.5424	0.4342	6.8379	0.8386	0.699	0.8117
TCGA_HT_7689_01	3.1424	0.429	7.2876	0.8656	0.7165	0.8694
TCGA_HT_7690_01	5.6577	0.6347	9.2594	0.9356	0.8319	0.8812
TCGA_HT_7691_01	8.1536	0.2711	12.1633	0.6351	0.4981	0.615
TCGA_HT_7692_01	0.4652	0.6049	7.6819	0.9427	0.8749	0.9255
TCGA_HT_7693_01	6.6976	0.7015	8.6114	0.9432	0.5561	0.9321
TCGA_HT_7694_01	3.5266	0.4381	7.3816	0.6405	0.5996	0.7178
TCGA_HT_7695_01	0.5922	0.4529	6.3203	0.6552	0.556	0.9172
TCGA_HT_7854_01	6.1434	0.3512	9.5094	0.0396	0.0704	0.1381
TCGA_HT_7855_01	2.8187	0.6836	6.3799	0.9492	0.914	0.9085
TCGA_HT_7856_01	4.5515	0.3064	7.6722	0.6076	0.5175	0.6785
TCGA_HT_7857_01	6.5862	0.4144	13.4633	0.394	0.3643	0.659
TCGA_HT_7858_01	2.4867	0.5347	7.453	0.8437	0.7322	0.8904
TCGA_HT_7860_01	4.6722	0.195	10.5541	0.1115	0.1186	0.6804
TCGA_HT_7873_01	2.2009	0.4029	5.9427	0.9235	0.8714	0.8893
TCGA_HT_7874_01	2.5914	0.3904	7.1369	0.678	0.4007	0.8365
TCGA_HT_7875_01	0.9469	0.7494	6.5027	0.9627	0.9077	0.9276
TCGA_HT_7877_01	2.5	0.2701	6.9354	0.8043	0.7263	0.889
TCGA_HT_7879_01	2.7304	0.5923	7.612	0.8901	0.8345	0.8961
TCGA_HT_7880_01	2.6031	0.3486	7.6318	0.6682	0.577	0.7457
TCGA_HT_7881_01	3.6454	0.4092	7.4006	0.6797	0.5389	0.7523
TCGA_HT_7882_01	6.5482	0.1871	14.9956	0.0395	0.0639	0.103
TCGA_HT_7884_01	1.8402	0.6445	6.3914	0.8994	0.8124	0.9194
TCGA_HT_7902_01	3.8805	0.1977	7.984	0.6914	0.5697	0.7339
TCGA_HT_8010_01	3.3133	0.3753	7.2166	0.7648	0.4966	0.7383
TCGA_HT_8011_01	5.9112	0.1127	11.1632	0.0469	0.1045	0.1378
TCGA_HT_8012_01	1.9307	0.7104	6.5226	0.953	0.8952	0.9323
TCGA_HT_8013_01	3.3719	0.5837	8.4625	0.878	0.7815	0.9354
TCGA_HT_8015_01	9.4086	0.1946	11.4835	0.04	0.0689	0.1142
TCGA_HT_8018_01	5.5033	0.3985	12.0907	0.6033	0.4171	0.7501
TCGA_HT_8019_01	1.1932	0.3192	8.0648	0.428	0.3247	0.6569
TCGA_HT_8104_01	8.3001	0.2112	11.0168	0.593	0.4848	0.6851
TCGA_HT_8105_01	4.3276	0.3902	8.5583	0.9292	0.8429	0.8994
TCGA_HT_8106_01	9.0026	0.31	10.5751	0.5909	0.5028	0.5752
TCGA_HT_8107_01	3.8571	0.2613	7.7444	0.1141	0.1612	0.1772
TCGA_HT_8108_01	1.6987	0.6141	7.0282	0.7786	0.4781	0.9356
TCGA_HT_8109_01	2.3445	0.3852	7.3816	0.8224	0.6857	0.8261
TCGA_HT_8110_01	7.4455	0.1337	10.679	0.0325	0.0574	0.0722
TCGA_HT_8111_01	4.08	0.4339	6.5161	0.7972	0.7201	0.8756
TCGA_HT_8113_01	2.3277	0.415	6.8939	0.6745	0.5494	0.7686
TCGA_HT_8114_01	4.1249	0.5159	10.1705	0.8999	0.7844	0.874
TCGA_HT_8558_01	2.3926	0.2092	7.4653	0.3738	0.3071	0.6424
TCGA_HT_8563_01	6.525	0.3241	9.112	0.6657	0.531	0.674
TCGA_HT_8564_01	3.7295	0.2828	10.7502	0.0477	0.0747	0.0784
TCGA_HT_A4DS_01	6.1025	0.1639	13.0421	0.489	0.4607	0.6653
TCGA_HT_A4DV_01	2.3219	0.3812	8.0056	0.7581	0.5596	0.884
TCGA_HT_A5R5_01	4.7908	0.4838	9.2934	0.7654	0.5076	0.8778
TCGA_HT_A5R7_01	3.3358	0.3781	7.0619	0.6836	0.4738	0.798
TCGA_HT_A5R9_01	1.7021	0.3915	9.008	0.8754	0.7714	0.8955
TCGA_HT_A5RA_01	6.8459	0.0939	12.4257	0.4766	0.4809	0.6284
TCGA_HT_A5RB_01	0.97	0.6748	6.804	0.8957	0.8941	0.8973
TCGA_HT_A5RC_01	7.5441	0.1442	12.3384	0.5798	0.4753	0.6726
TCGA_HT_A614_01	1.7819	0.5657	7.4238	0.8806	0.8164	0.9133
TCGA_HT_A615_01	3.687	0.4458	7.2239	0.6637	0.5702	0.8755
TCGA_HT_A616_01	0.5667	0.3994	7.5144	0.8429	0.767	0.9226
TCGA_HT_A617_01	6.8857	0.1456	12.851	0.044	0.0616	0.1076
TCGA_HT_A618_01	5.5361	0.4125	8.3675	0.7704	0.6106	0.6449
TCGA_HT_A619_01	4.9903	0.3806	8.6303	0.9645	0.8764	0.9353
TCGA_HT_A61A_01	2.959	0.3182	8.6794	0.6053	0.5237	0.6805
TCGA_HT_A61B_01	2.3209	0.5056	9.7381	0.918	0.8583	0.9113
TCGA_HT_A61C_01	7.5693	0.0862	12.7374	0.0385	0.0699	0.0931
TCGA_HT_A74H_01	8.1933	0.1943	11.0578	0.0807	0.0882	0.1838
TCGA_HT_A74J_01	6.3637	0.5852	7.672	0.8837	0.822	0.8861
TCGA_HT_A74K_01	4.6555	0.4277	11.5796	0.8058	0.6709	0.882
TCGA_HT_A74L_01	3.6677	0.6028	5.8959	0.9687	0.895	0.912
TCGA_HT_A74O_01	4.4611	0.5662	8.9192	0.8647	0.8413	0.7696
TCGA_HW_7486_01	2.9546	0.4614	7.3333	0.7707	0.7147	0.8251
TCGA_HW_7487_01	2.3403	0.557	7.0439	0.8386	0.734	0.8979
TCGA_HW_7489_01	2.4664	0.5286	7.5783	0.7851	0.7529	0.8099
TCGA_HW_7490_01	2.7877	0.4996	8.8346	0.8796	0.866	0.9373
TCGA_HW_7491_01	2.1634	0.7244	7.3926	0.9579	0.9246	0.9542
TCGA_HW_7493_01	2.958	0.5723	8.2911	0.8522	0.7435	0.9254
TCGA_HW_7495_01	1.8821	0.395	6.6659	0.8947	0.7464	0.7502
TCGA_HW_8319_01	3.1039	0.3456	6.5605	0.913	0.5765	0.9109
TCGA_HW_8320_01	1.6321	0.4407	6.7228	0.9272	0.9071	0.89
TCGA_HW_8321_01	5.2191	0.5429	7.131	0.8531	0.8354	0.8321
TCGA_HW_8322_01	0.9078	0.5283	7.0266	0.9568	0.9299	0.9232
TCGA_HW_A5KJ_01	3.4522	0.4118	9.3584	0.8822	0.8129	0.8854
TCGA_HW_A5KK_01	7.5072	0.1256	11.4958	0.0419	0.1279	0.1241
TCGA_HW_A5KL_01	1.7389	0.5149	6.372	0.9318	0.5342	0.9434
TCGA_HW_A5KM_01	2.5821	0.5763	8.5133	0.8825	0.8116	0.8986
TCGA_IK_7675_01	3.1598	0.5893	6.8767	0.966	0.9329	0.9402
TCGA_IK_8125_01	1.3467	0.5278	7.4871	0.9061	0.8346	0.9172
TCGA_KT_A74X_01	1.2839	0.5533	8.1335	0.9201	0.8606	0.919
TCGA_KT_A7W1_01	5.4412	0.1114	12.2746	0.1377	0.0987	0.6899
TCGA_P5_A5ET_01	0.8404	0.4278	6.4126	0.898	0.8753	0.903
TCGA_P5_A5EU_01	4.4154	0.2691	9.9437	0.9312	0.8875	0.8845
TCGA_P5_A5EV_01	0.4881	0.4978	6.6788	0.8995	0.8217	0.8774
TCGA_P5_A5EW_01	0.8703	0.2596	4.9835	0.7865	0.5717	0.9426
TCGA_P5_A5EX_01	6.5977	0.3106	11.3326	0.7761	0.6427	0.8782
TCGA_P5_A5EY_01	5.81	0.2434	10.653	0.0443	0.0817	0.1077
TCGA_P5_A5EZ_01	3.7883	0.4224	8.2561	0.7714	0.7444	0.8479
TCGA_P5_A5F0_01	0.9287	0.5865	6.937	0.8265	0.7454	0.8288
TCGA_P5_A5F1_01	3.0768	0.4621	7.9596	0.8926	0.8748	0.8899
TCGA_P5_A5F2_01	1.5475	0.2747	8.2198	0.8544	0.548	0.909
TCGA_P5_A5F4_01	2.5866	0.6041	7.7447	0.7746	0.4858	0.9098
TCGA_P5_A5F6_01	4.7531	0.1452	12.2266	0.055	0.0734	0.0787
TCGA_P5_A72U_01	7.6875	0.1212	12.704	0.5774	0.3817	0.6612
TCGA_P5_A72W_01	3.4088	0.6958	6.6104	0.9537	0.8459	0.9274
TCGA_P5_A72X_01	3.7792	0.5642	8.8357	0.8389	0.7826	0.894
TCGA_P5_A72Z_01	1.9085	0.3751	8.1161	0.9758	0.9385	0.9349
TCGA_P5_A730_01	2.5243	0.4474	8.1986	0.945	0.8745	0.839
TCGA_P5_A731_01	6.2003	0.2002	11.8082	0.9081	0.8144	0.7176
TCGA_P5_A733_01	4.0515	0.6	8.3563	0.8457	0.7864	0.9005
TCGA_P5_A735_01	1.4454	0.6784	5.5176	0.9459	0.6307	0.946
TCGA_P5_A736_01	5.8449	0.4649	9.161	0.8364	0.7462	0.9316
TCGA_P5_A737_01	0	0.6693	9.0069	0.9649	0.913	0.9146
TCGA_P5_A77W_01	0.4778	0.5105	6.5733	0.9133	0.8579	0.9412
TCGA_P5_A77X_01	0.4935	0.5507	6.7144	0.6576	0.5541	0.9184
TCGA_P5_A780_01	5.4953	0.5294	8.3851	0.839	0.7731	0.919
TCGA_P5_A781_01	0.8563	0.4822	6.6242	0.8985	0.7859	0.904
TCGA_QH_A65R_01	3.0811	0.5848	8.5837	0.9348	0.8303	0.9284
TCGA_QH_A65S_01	1.5039	0.2931	7.5041	0.8598	0.6322	0.9138
TCGA_QH_A65V_01	2.8443	0.3869	7.8733	0.8721	0.7252	0.9074
TCGA_QH_A65X_01	3.9789	0.3523	10.7145	0.9298	0.8785	0.908
TCGA_QH_A65Z_01	1.209	0.7171	6.4086	0.9641	0.905	0.9203
TCGA_QH_A6CS_01	7.0835	0.1495	10.4404	0.0613	0.1493	0.0941
TCGA_QH_A6CU_01	6.3619	0.3751	7.9351	0.9202	0.8134	0.9439
TCGA_QH_A6CV_01	2.6878	0.1459	11.912	0.0363	0.0807	0.1088
TCGA_QH_A6CW_01	2.7146	0.5938	7.274	0.9491	0.8785	0.908
TCGA_QH_A6CX_01	6.1597	0.1884	12.0829	0.0625	0.0986	0.1896
TCGA_QH_A6CY_01	2.3038	0.3772	7.0499	0.7965	0.7707	0.8673
TCGA_QH_A6CZ_01	0	0.5607	5.9904	0.9553	0.9186	0.9031
TCGA_QH_A6X3_01	1.1893	0.6104	5.955	0.9362	0.8782	0.9207
TCGA_QH_A6X4_01	2.0246	0.5633	5.9629	0.9391	0.8816	0.9108
TCGA_QH_A6X5_01	2.4086	0.4859	6.857	0.881	0.5579	0.8428
TCGA_QH_A6X8_01	1.7579	0.6033	7.4601	0.9128	0.8052	0.9166
TCGA_QH_A6X9_01	1.759	0.4602	6.8008	0.8947	0.8228	0.8801
TCGA_QH_A6XA_01	1.4764	0.5625	6.6493	0.7061	0.5595	0.721
TCGA_QH_A6XC_01	6.34	0.1463	11.4466	0.062	0.0871	0.1348
TCGA_QH_A86X_01	1.0758	0.6256	6.459	0.9048	0.8758	0.9012
TCGA_QH_A870_01	0.5266	0.5488	5.7862	0.9134	0.8274	0.9309
TCGA_R8_A6MK_01	2.1989	0.584	6.6775	0.9013	0.86	0.9097
TCGA_R8_A6ML_01	2.9435	0.6975	7.8939	0.9573	0.8931	0.9192
TCGA_R8_A6MO_01	3.7561	0.518	8.5733	0.9022	0.7637	0.9148
TCGA_R8_A6YH_01	2.072	0.4503	6.4648	0.9681	0.9302	0.8837
TCGA_R8_A73M_01	0	0.6886	7.0817	0.9604	0.5705	0.9401
TCGA_RY_A83X_01	1.2214	0.6115	7.1309	0.8747	0.7723	0.9149
TCGA_RY_A83Y_01	1.624	0.6087	7.8652	0.9199	0.8749	0.9209
TCGA_RY_A83Z_01	2.7049	0.242	7.8254	0.9518	0.8707	0.9298
TCGA_RY_A840_01	0.8759	0.6145	6.4975	0.9559	0.8459	0.9383
TCGA_RY_A843_01	1.7243	0.4874	6.8748	0.7337	0.7367	0.8384
TCGA_RY_A845_01	0.7817	0.4751	6.2441	0.8669	0.8154	0.9184
TCGA_RY_A847_01	1.5797	0.4414	7.3541	0.8425	0.8456	0.8238
TCGA_S9_A6TS_01	1.2159	0.5037	8.0384	0.9096	0.8256	0.8641
TCGA_S9_A6TU_01	1.942	0.6168	7.3572	0.8726	0.8428	0.9221
TCGA_S9_A6TV_01	7.2449	0.4627	10.4183	0.9259	0.8789	0.9226
TCGA_S9_A6TW_01	6.084	0.4568	9.3426	0.7813	0.681	0.8436
TCGA_S9_A6TX_01	1.9515	0.5497	6.9483	0.9469	0.8221	0.8832
TCGA_S9_A6TY_01	1.1496	0.6513	6.8523	0.9179	0.839	0.9162
TCGA_S9_A6TZ_01	2.9822	0.6342	7.8745	0.9273	0.6184	0.9289
TCGA_S9_A6U0_01	8.9829	0.0935	12.4775	0.0396	0.0951	0.2199
TCGA_S9_A6U1_01	1.3753	0.5087	6.5768	0.8759	0.8218	0.8564
TCGA_S9_A6U2_01	0.9609	0.2596	7.686	0.7828	0.5203	0.8643
TCGA_S9_A6U5_01	2.3839	0.421	7.875	0.8851	0.8727	0.9005
TCGA_S9_A6U6_01	0.4867	0.5519	7.0019	0.9145	0.7913	0.8421
TCGA_S9_A6U8_01	2.0749	0.572	6.9226	0.8678	0.8354	0.8747
TCGA_S9_A6U9_01	4.1593	0.4158	8.5963	0.9211	0.8346	0.8813
TCGA_S9_A6UA_01	7.0733	0.3319	13.8617	0.0672	0.0868	0.1703
TCGA_S9_A6UB_01	0.9054	0.6882	5.5362	0.9577	0.8991	0.8928
TCGA_S9_A6WD_01	2.464	0.5186	6.243	0.9195	0.864	0.9025
TCGA_S9_A6WE_01	2.3351	0.6648	6.5962	0.9502	0.8706	0.8228
TCGA_S9_A6WG_01	3.6202	0.4187	13.0345	0.7248	0.5919	0.69
TCGA_S9_A6WH_01	3.6285	0.5725	6.5064	0.7329	0.6254	0.9171
TCGA_S9_A6WI_01	1.7802	0.3246	7.6309	0.6633	0.5135	0.607
TCGA_S9_A6WL_01	5.8755	0.5612	9.9143	0.9125	0.7886	0.7946
TCGA_S9_A6WM_01	6.1612	0.1739	11.8011	0.1663	0.1542	0.6256
TCGA_S9_A6WN_01	7.4636	0.3595	9.1632	0.7127	0.5491	0.8004
TCGA_S9_A6WO_01	1.7364	0.4742	5.5017	0.9356	0.9143	0.9324
TCGA_S9_A6WP_01	2.3721	0.5633	8.4446	0.8717	0.8867	0.8909
TCGA_S9_A6WQ_01	2.2537	0.5269	7.9252	0.7195	0.4735	0.9075
TCGA_S9_A7IQ_01	0.4227	0.3427	7.1592	0.7726	0.675	0.8562
TCGA_S9_A7IS_01	3.8228	0.3009	10.7862	0.715	0.5861	0.8724
TCGA_S9_A7IX_01	6.5187	0.1749	12.0278	0.0292	0.0592	0.0958
TCGA_S9_A7IY_01	2.9161	0.5868	7.1712	0.8265	0.7896	0.8843
TCGA_S9_A7IZ_01	6.1928	0.3227	7.5028	0.8075	0.6886	0.8884
TCGA_S9_A7J0_01	3.8498	0.6096	7.072	0.9781	0.9125	0.9334
TCGA_S9_A7J1_01	0.5956	0.5529	6.4149	0.8578	0.747	0.8644
TCGA_S9_A7J2_01	0	0.5063	6.3998	0.9724	0.939	0.9136
TCGA_S9_A7J3_01	3.0839	0.5907	7.6893	0.8692	0.7684	0.9363
TCGA_S9_A7QW_01	0.8979	0.6892	5.3925	0.7159	0.4425	0.9318
TCGA_S9_A7QX_01	1.5068	0.5678	6.9373	0.9269	0.5102	0.96
TCGA_S9_A7QY_01	3.2299	0.359	7.8017	0.866	0.7602	0.9256
TCGA_S9_A7QZ_01	1.5654	0.6029	7.7081	0.9067	0.8369	0.9057
TCGA_S9_A7R1_01	1.0271	0.4843	7.864	0.9014	0.8721	0.9322
TCGA_S9_A7R2_01	8.307	0.1344	10.5077	0.032	0.0625	0.1111
TCGA_S9_A7R3_01	1.9804	0.5041	6.5887	0.9298	0.8512	0.9152
TCGA_S9_A7R4_01	2.3758	0.6885	8.6935	0.9176	0.8318	0.9247
TCGA_S9_A7R7_01	9.1266	0.3815	9.8752	0.7288	0.673	0.8367
TCGA_S9_A7R8_01	1.8465	0.6332	6.7751	0.9684	0.8941	0.9155
TCGA_S9_A89V_01	4.7295	0.2055	11.2586	0.0363	0.0587	0.1236
TCGA_S9_A89Z_01	6.6445	0.4907	8.8284	0.8403	0.8283	0.8993
TCGA_TM_A7C3_01	4.1531	0.1708	12.1586	0.7107	0.5538	0.6188
TCGA_TM_A7C4_01	2.7739	0.5585	8.9439	0.8263	0.715	0.9088
TCGA_TM_A7C5_01	0.6569	0.4764	6.932	0.92	0.9351	0.9043
TCGA_TM_A7CA_01	0.963	0.6241	6.2114	0.9236	0.8583	0.8288
TCGA_TM_A7CF_01	0	0.4354	7.1132	0.8905	0.8171	0.9245
TCGA_TM_A7CF_02	1.9327	0.3048	7.2001	0.8062	0.6575	0.8761
TCGA_TM_A84B_01	2.6145	0.0819	10.365	0.0281	0.0751	0.1153
TCGA_TM_A84C_01	6.0883	0.3439	12.7449	0.0306	0.0568	0.0813
TCGA_TM_A84F_01	2.7626	0.3942	8.4909	0.6959	0.6184	0.7001
TCGA_TM_A84G_01	0	0.3616	6.598	0.8184	0.5581	0.9365
TCGA_TM_A84H_01	2.2101	0.6134	5.22	0.8847	0.7752	0.9012
TCGA_TM_A84I_01	4.6521	0.0773	6.6538	0.9645	0.8331	0.9157
TCGA_TM_A84J_01	6.4489	0.1967	11.6352	0.0641	0.0845	0.1742
TCGA_TM_A84L_01	2.1288	0.3634	7.1664	0.7206	0.6279	0.8229
TCGA_TM_A84M_01	0.4995	0.5466	6.556	0.9746	0.9139	0.9165
TCGA_TM_A84O_01	1.7137	0.1552	7.3108	0.8218	0.7274	0.9329
TCGA_TM_A84Q_01	3.2237	0.5394	6.9385	0.7943	0.7687	0.8789
TCGA_TM_A84R_01	1.9279	0.3723	7.8766	0.5224	0.4268	0.5045
TCGA_TM_A84S_01	1.8954	0.391	7.2605	0.8309	0.8285	0.8747
TCGA_TM_A84T_01	0	0.4119	6.4921	0.9239	0.8632	0.9235
TCGA_TQ_A7RF_01	0.9279	0.6531	7.008	0.9308	0.8942	0.9124
TCGA_TQ_A7RG_01	1.7906	0.5494	7.3517	0.9466	0.8678	0.8894
TCGA_TQ_A7RH_01	1.5391	0.6048	6.8924	0.9181	0.8672	0.9119
TCGA_TQ_A7RI_01	2.3707	0.4322	6.7126	0.8717	0.5473	0.8797
TCGA_TQ_A7RJ_01	1.8238	0.5079	6.5806	0.8676	0.8525	0.8076
TCGA_TQ_A7RK_01	2.3056	0.4081	6.1785	0.9256	0.8931	0.8949
TCGA_TQ_A7RK_02	1.54005	0.39235	6.6323	0.9044	0.86285	0.7473
TCGA_TQ_A7RM_01	1.3365	0.324	8.9451	0.9712	0.6989	0.902
TCGA_TQ_A7RN_01	1.1753	0.6131	6.441	0.95	0.8763	0.9267
TCGA_TQ_A7RO_01	0.5385	0.5367	7.0517	0.9045	0.8476	0.8297
TCGA_TQ_A7RP_01	14.1602	0.1408	10.2806	0.0481	0.1101	0.1089
TCGA_TQ_A7RQ_01	1.2066	0.2126	6.208	0.7385	0.5587	0.9212
TCGA_TQ_A7RR_01	3.1902	0.4383	7.1942	0.7587	0.7613	0.8749
TCGA_TQ_A7RS_01	1.5332	0.4667	6.2837	0.9597	0.8809	0.9335
TCGA_TQ_A7RU_01	1.18	0.4233	7.5669	0.9768	0.9192	0.9102
TCGA_TQ_A7RV_01	2.3787	0.5747	7.1371	0.873	0.8427	0.884
TCGA_TQ_A7RV_02	4.4054	0.4735	8.7245	0.6325	0.6831	0.7078
TCGA_TQ_A7RW_01	3.9103	0.3744	6.242	0.846	0.779	0.8449
TCGA_TQ_A8XE_01	1.8328	0.5051	5.9228	0.7154	0.4951	0.9378
TCGA_TQ_A8XE_02	2.0474	0.5704	8.1063	0.5591	0.432	0.9193
TCGA_VM_A8C8_01	0	0.601	6.0872	0.8815	0.8253	0.899
TCGA_VM_A8C9_01	11.1418	0.1503	13.7897	0.3299	0.1775	0.6168
TCGA_VM_A8CA_01	3.53	0.3177	10.8149	0.8334	0.8215	0.8868
TCGA_VM_A8CB_01	1.2762	0.6413	6.6584	0.9511	0.9295	0.8994
TCGA_VM_A8CD_01	6.2296	0.2913	12.4384	0.0262	0.0775	0.0833
TCGA_VM_A8CE_01	1.1382	0.4299	7.3952	0.7933	0.7807	0.8811
TCGA_VM_A8CF_01	4.3672	0.4786	8.5647	0.7961	0.5754	0.9139
TCGA_VM_A8CH_01	1.7475	0.5138	7.5561	0.8773	0.7928	0.8929
TCGA_VV_A829_01	3.9336	0.2015	8.8493	0.9522	0.8991	0.9103
TCGA_VV_A86M_01	4.7371	0.6526	7.9938	0.8945	0.8391	0.9058
TCGA_VW_A7QS_01	7.313	0.2857	10.5134	0.879	0.5573	0.9028
TCGA_VW_A8FI_01	5.3124	0.0952	12.299	0.0271	0.058	0.0907
TCGA_W9_A837_01	1.0702	0.5143	6.7554	0.8316	0.778	0.8792
TCGA_WH_A86K_01	2.3804	0.3612	8.2388	0.9403	0.8677	0.8401
TCGA_WY_A858_01	4.2883	0.4312	8.8558	0.6744	0.5931	0.8619
TCGA_WY_A859_01	1.1967	0.5087	6.8297	0.8472	0.6148	0.894
TCGA_WY_A85A_01	0	0.4197	6.839	0.7885	0.7668	0.8776
TCGA_WY_A85B_01	1.656	0.6559	6.8241	0.897	0.8599	0.9289
TCGA_WY_A85C_01	3.434	0.5895	8.0543	0.8686	0.82	0.8641
TCGA_WY_A85D_01	1.7931	0.5957	6.0571	0.9253	0.8665	0.9174
TCGA_WY_A85E_01	0	0.6257	7.2321	0.8637	0.8123	0.9257

## Sheet: Rawdata of Figure 6
Sample ID	SERPINA5_cg15509705	TIMP1_cg27151711	TIMP1_cg16523424	TIMP1_cg04791822	_OS	_OS_IND	_RFS	_RFS_IND
TCGA_FG_A4MU_01	0.0765	0.0401	0.07	0.1252	326	0
TCGA_DU_6402_01	0.1275	0.0373	0.0554	0.0656	214	1	103	1
TCGA_FG_6692_01	0.1202	0.0424	0.0755	0.0683	413	0	413	0
TCGA_HT_8110_01	0.1337	0.0325	0.0574	0.0722	419	0	419	0
TCGA_HT_A61C_01	0.0862	0.0385	0.0699	0.0931	103	0
TCGA_DU_6406_01	0.0895	0.6049	0.4607	0.6027	512	1
TCGA_DU_A7TJ_01	0.0904	0.0235	0.0559	0.0904	17	0
TCGA_DU_7013_01	0.099	0.0261	0.0738	0.0732	269	1	187	1
TCGA_DU_A5TT_01	0.1633	0.0321	0.0817	0.0751	151	0	151	0
TCGA_HT_8564_01	0.2828	0.0477	0.0747	0.0784	478	0	120	1
TCGA_DU_6403_01	0.0951	0.2031	0.2958	0.5563	354	1
TCGA_P5_A5F6_01	0.1452	0.055	0.0734	0.0787	39	0	39	0
TCGA_CS_6186_01	0.3476	0.0327	0.059	0.0788	538	1	188	1
TCGA_TM_A84C_01	0.3439	0.0306	0.0568	0.0813	492	1	492	0
TCGA_CS_5395_01	0.2533	0.0301	0.0943	0.0816	639	1	287	1
TCGA_VM_A8CD_01	0.2913	0.0262	0.0775	0.0833	240	1	240	0
TCGA_CS_6188_01	0.1423	0.0508	0.0754	0.0888	725	0	647	1
TCGA_KT_A7W1_01	0.1114	0.1377	0.0987	0.6899	144	0
TCGA_DU_7292_01	0.1965	0.0368	0.1051	0.0897	242	1	91	1
TCGA_VW_A8FI_01	0.0952	0.0271	0.058	0.0907	245	1	245	0
TCGA_QH_A6CS_01	0.1495	0.0613	0.1493	0.0941	588	0	498	1
TCGA_DU_A7TD_01	0.1208	0.0293	0.0723	0.159	228	1
TCGA_P5_A72U_01	0.1212	0.5774	0.3817	0.6612	5	0
TCGA_S9_A7IX_01	0.1749	0.0292	0.0592	0.0958	679	0	679	1
TCGA_HT_7882_01	0.1871	0.0395	0.0639	0.103	113	1	113	0
TCGA_QH_A6CV_01	0.1459	0.0363	0.0807	0.1088	442	0	442	0
TCGA_S9_A7R2_01	0.1344	0.032	0.0625	0.1111	316	1	316	0
TCGA_CS_4941_01	0.1468	0.0327	0.0889	0.113	234	1	9	1
TCGA_FG_A4MW_01	0.162	0.0273	0.0888	0.1132	559	1	226	1
TCGA_DU_A76L_01	0.1368	0.0409	0.0865	0.1086	814	1
TCGA_DU_7006_01	0.1408	0.3751	0.1948	0.6418	349	1
TCGA_FG_A70Z_01	0.1412	0.1353	0.1979	0.5886	328	0
TCGA_TM_A84B_01	0.0819	0.0281	0.0751	0.1153	758	1	758	0
TCGA_HW_A5KK_01	0.1256	0.0419	0.1279	0.1241	388	1	388	0
TCGA_QH_A6XC_01	0.1463	0.062	0.0871	0.1348	153	0	153	0
TCGA_HT_A617_01	0.1456	0.044	0.0616	0.1076	491	0
TCGA_HT_8011_01	0.1127	0.0469	0.1045	0.1378	494	0	278	1
TCGA_HT_7854_01	0.3512	0.0396	0.0704	0.1381	292	0	292	0
TCGA_DU_7290_01	0.1464	0.5798	0.4999	0.6424	315	1
TCGA_S9_A6UA_01	0.3319	0.0672	0.0868	0.1703	178	1	161	1
TCGA_TM_A84J_01	0.1967	0.0641	0.0845	0.1742	735	0	454	1
TCGA_HT_8107_01	0.2613	0.1141	0.1612	0.1772	14	0	14	0
TCGA_QH_A6CX_01	0.1884	0.0625	0.0986	0.1896	372	1	273	1
TCGA_S9_A6U0_01	0.0935	0.0396	0.0951	0.2199	698	0	692	1
TCGA_FG_8181_01	0.2548	0.1918	0.2047	0.2269	394	0	394	0
TCGA_FG_5963_02	0.0929	0.0445	0.091	0.3482	547	0	395	1
TCGA_DU_8165_01	0.2468	0.0626	0.0833	0.4823	582	0	582	0
TCGA_TM_A84R_01	0.3723	0.5224	0.4268	0.5045	566	0	566	0
TCGA_DB_A75P_01	0.2252	0.2714	0.2151	0.5186	492	0	492	0
TCGA_HT_7469_01	0.078	0.0519	0.286	0.5427	351	1	92	1
TCGA_CS_6669_01	0.2519	0.2487	0.35	0.5455	225	0	225	0
TCGA_HT_A4DS_01	0.1639	0.489	0.4607	0.6653	7	0
TCGA_DU_5852_01	0.1087	0.633	0.4265	0.5639	205	1	24	1
TCGA_HT_8106_01	0.31	0.5909	0.5028	0.5752	3	0	3	0
TCGA_DU_7012_01	0.1276	0.6014	0.4258	0.5961	199	1	199	0
TCGA_DB_A64O_01	0.1734	0.0481	0.0877	0.1454	775	1
TCGA_FG_A87Q_01	0.1558	0.4994	0.3316	0.5992	174	0	174	0
TCGA_S9_A6WI_01	0.3246	0.6633	0.5135	0.607	2585	0	2585	0
TCGA_DU_6405_01	0.8546	0.5554	0.3897	0.6142	605	1	486	1
TCGA_HT_7691_01	0.2711	0.6351	0.4981	0.615	3	0	3	0
TCGA_VM_A8C9_01	0.1503	0.3299	0.1775	0.6168	915	0	915	0
TCGA_TM_A7C3_01	0.1708	0.7107	0.5538	0.6188	1504	0	1323	1
TCGA_DU_A7TB_01	0.1905	0.0548	0.0845	0.0819	1287	0
TCGA_S9_A6WM_01	0.1739	0.1663	0.1542	0.6256	604	0	505	1
TCGA_HT_A74H_01	0.1943	0.0807	0.0882	0.1838	74	0
TCGA_HT_8015_01	0.1946	0.04	0.0689	0.1142	3	0
TCGA_HT_7860_01	0.195	0.1115	0.1186	0.6804	15	0
TCGA_DU_5854_01	0.2395	0.5528	0.4174	0.6284	257	0	202	1
TCGA_HT_A5RA_01	0.0939	0.4766	0.4809	0.6284	832	0	832	0
TCGA_DU_8161_01	0.3359	0.3021	0.2123	0.6396	722	1	111	1
TCGA_HT_8558_01	0.2092	0.3738	0.3071	0.6424	418	0	418	0
TCGA_P5_A731_01	0.2002	0.9081	0.8144	0.7176	274	0
TCGA_HT_A618_01	0.4125	0.7704	0.6106	0.6449	512	0	512	0
TCGA_FG_5963_01	0.1639	0.0995	0.1268	0.6507	547	0	395	1
TCGA_S9_A89V_01	0.2055	0.0363	0.0587	0.1236	569	0
TCGA_DU_5872_02	0.163	0.3304	0.3155	0.6512	532	0	265	1
TCGA_DU_A76K_01	0.2109	0.0369	0.0801	0.0844	347	1
TCGA_HT_8104_01	0.2112	0.593	0.4848	0.6851	372	0
TCGA_DU_6404_02	0.2019	0.43045	0.33345	0.65425	4068	1	1154	1
TCGA_HT_8019_01	0.3192	0.428	0.3247	0.6569	1004	0	1004	0
TCGA_HT_7857_01	0.4144	0.394	0.3643	0.659	7	0	7	0
TCGA_DU_6404_01	0.2898	0.6213	0.4193	0.6606	4068	1	1154	1
TCGA_HT_A5RC_01	0.1442	0.5798	0.4753	0.6726	162	1	162	0
TCGA_HT_8563_01	0.3241	0.6657	0.531	0.674	860	0	860	0
TCGA_DU_A7T6_01	0.238	0.9137	0.7755	0.8845	547	1
TCGA_HT_7856_01	0.3064	0.6076	0.5175	0.6785	1189	0	1189	0
TCGA_P5_A5EY_01	0.2434	0.0443	0.0817	0.1077	72	0
TCGA_FG_8189_01	0.3132	0.4409	0.3464	0.6797	685	0	685	0
TCGA_DU_5847_01	0.165	0.3514	0.1859	0.682	548	0	548	0
TCGA_FG_7643_01	0.2177	0.4956	0.4219	0.6899	293	0	254	1
TCGA_S9_A6WG_01	0.4187	0.7248	0.5919	0.69	2437	0	2437	0
TCGA_DU_A5TY_01	0.105	0.424	0.425	0.6965	371	0	371	0
TCGA_FG_6688_01	0.1511	0.5874	0.4816	0.6974	221	0	221	0
TCGA_TM_A84F_01	0.3942	0.6959	0.6184	0.7001	1796	0	1796	0
TCGA_DU_5853_01	0.5941	0.911	0.891	0.7058	407	0	407	0
TCGA_HT_7694_01	0.4381	0.6405	0.5996	0.7178	210	0	210	0
TCGA_DU_6392_01	0.1014	0.6347	0.5081	0.7183	6423	0	950	1
TCGA_QH_A6XA_01	0.5625	0.7061	0.5595	0.721	502	0	502	0
TCGA_FG_A713_01	0.4067	0.7038	0.4735	0.723	159	0	159	0
TCGA_HT_7680_01	0.1307	0.4128	0.5307	0.7245	23	0	23	0
TCGA_CS_5397_01	0.4069	0.6443	0.5506	0.7316	194	1	194	0
TCGA_DB_5276_01	0.4102	0.574	0.5599	0.733	2218	0	2218	0
TCGA_DU_8158_01	0.2879	0.4902	0.3761	0.6668	155	1
TCGA_HT_7902_01	0.1977	0.6914	0.5697	0.7339	956	0	956	0
TCGA_HT_7620_01	0.3471	0.6986	0.5333	0.7348	434	0	280	1
TCGA_DU_5849_01	0.4956	0.784	0.7246	0.7359	443	0	443	0
TCGA_HT_8010_01	0.3753	0.7648	0.4966	0.7383	50	0	50	0
TCGA_HT_7467_01	0.292	0.6309	0.5554	0.6844	3	0
TCGA_HT_7681_01	0.4183	0.9002	0.4629	0.7407	1359	0	1359	0
TCGA_HT_7880_01	0.3486	0.6682	0.577	0.7457	162	0	162	0
TCGA_HT_8018_01	0.3985	0.6033	0.4171	0.7501	1152	1	1152	0
TCGA_TM_A7CF_02	0.3048	0.8062	0.6575	0.8761	1472	0
TCGA_HW_7495_01	0.395	0.8947	0.7464	0.7502	131	0	131	0
TCGA_HT_7881_01	0.4092	0.6797	0.5389	0.7523	89	0	89	0
TCGA_CS_6667_01	0.5796	0.669	0.5745	0.7557	230	0	230	0
TCGA_DU_8162_01	0.2768	0.451	0.3595	0.7576	444	1	402	1
TCGA_VM_A8CA_01	0.3177	0.8334	0.8215	0.8868	411	0
TCGA_HT_A61A_01	0.3182	0.6053	0.5237	0.6805	194	0
TCGA_FG_8188_01	0.5131	0.9058	0.7963	0.7647	455	0	384	1
TCGA_HT_7481_01	0.3839	0.7759	0.6945	0.7677	1800	0	880	1
TCGA_HT_8113_01	0.415	0.6745	0.5494	0.7686	900	0	900	0
TCGA_E1_A7YV_01	0.5158	0.6563	0.5026	0.7818	987	1	164	1
TCGA_DU_7007_01	0.5411	0.8493	0.7906	0.7913	1915	1	1915	0
TCGA_S9_A6WL_01	0.5612	0.9125	0.7886	0.7946	946	0	946	0
TCGA_HT_7607_01	0.4145	0.6814	0.5399	0.7962	96	1	96	0
TCGA_HT_A5R7_01	0.3781	0.6836	0.4738	0.798	426	0	426	0
TCGA_S9_A6WN_01	0.3595	0.7127	0.5491	0.8004	484	0	303	1
TCGA_FG_A6J3_01	0.3959	0.8656	0.4611	0.8006	677	0	677	0
TCGA_DB_A64V_01	0.4459	0.7442	0.641	0.8035	889	0	889	0
TCGA_DH_A669_02	0.3418	0.9697	0.8816	0.9101	919	1
TCGA_HW_7489_01	0.5286	0.7851	0.7529	0.8099	253	0	253	0
TCGA_DB_5270_01	0.4673	0.6038	0.478	0.8105	3733	0	3733	0
TCGA_HT_7688_01	0.4342	0.8386	0.699	0.8117	964	0	964	0
TCGA_HT_7605_01	0.4107	0.8083	0.7678	0.819	139	0	139	0
TCGA_S9_A6WE_01	0.6648	0.9502	0.8706	0.8228	2208	0	2208	0
TCGA_TM_A84L_01	0.3634	0.7206	0.6279	0.8229	1242	1	1045	1
TCGA_HT_7476_01	0.369	0.7419	0.7577	0.8249	199	0	199	0
TCGA_HW_7486_01	0.4614	0.7707	0.7147	0.8251	609	0	609	0
TCGA_CS_6290_01	0.4946	0.7042	0.7387	0.8273	546	0	546	0
TCGA_P5_A5F0_01	0.5865	0.8265	0.7454	0.8288	125	0	125	0
TCGA_TM_A7CA_01	0.6241	0.9236	0.8583	0.8288	1058	0	1058	0
TCGA_DB_A4XC_01	0.5456	0.8361	0.7826	0.8294	1421	0	1421	0
TCGA_FG_8182_01	0.4961	0.8786	0.782	0.8298	416	0	416	0
TCGA_HT_7470_01	0.46	0.7803	0.669	0.8321	268	0	268	0
TCGA_DU_A7TG_01	0.3611	0.5164	0.456	0.5682	1351	1
TCGA_HW_8321_01	0.5429	0.8531	0.8354	0.8321	596	0	596	0
TCGA_HT_7874_01	0.3904	0.678	0.4007	0.8365	1130	0	1130	0
TCGA_S9_A7R7_01	0.3815	0.7288	0.673	0.8367	3000	0	2894	1
TCGA_HT_7602_01	0.3639	0.7135	0.6567	0.7575	908	0
TCGA_DU_5851_01	0.4257	0.7787	0.5349	0.8384	531	0	531	0
TCGA_WH_A86K_01	0.3612	0.9403	0.8677	0.8401	405	0	405	0
TCGA_FG_5965_02	0.29625	0.7179	0.60275	0.84025	979	0	715	1
TCGA_DU_A76O_01	0.5774	0.8971	0.8346	0.8415	217	0	217	0
TCGA_S9_A6U6_01	0.5519	0.9145	0.7913	0.8421	489	0	489	0
TCGA_P5_A72Z_01	0.3751	0.9758	0.9385	0.9349	354	0
TCGA_QH_A6X5_01	0.4859	0.881	0.5579	0.8428	497	0	497	0
TCGA_S9_A6TW_01	0.4568	0.7813	0.681	0.8436	1151	0	861	1
TCGA_DH_A66B_01	0.3859	0.8434	0.8662	0.8438	1279	0	1279	0
TCGA_FG_5964_01	0.4182	0.787	0.6841	0.8458	378	0	378	0
TCGA_DU_A6S3_01	0.6047	0.8914	0.7523	0.8461	82	0	82	0
TCGA_DU_A7TI_01	0.5223	0.8391	0.7681	0.8358
TCGA_P5_A5EZ_01	0.4224	0.7714	0.7444	0.8479	70	0	70	0
TCGA_DU_8163_01	0.3846	0.7801	0.7901	0.8489	629	0	509	1
TCGA_HT_7477_01	0.1664	0.8883	0.8763	0.851	738	0	738	0
TCGA_DU_A5TS_01	0.1136	0.8083	0.8154	0.8523	460	0	460	0
TCGA_FG_A60L_01	0.4639	0.8279	0.7654	0.8532	499	0	499	0
TCGA_HT_7603_01	0.4718	0.7704	0.6648	0.8544	705	0	705	0
TCGA_HT_8109_01	0.3852	0.8224	0.6857	0.8261	169	0
TCGA_S9_A7IQ_01	0.3427	0.7726	0.675	0.8562	1099	0	1099	0
TCGA_S9_A6U1_01	0.5087	0.8759	0.8218	0.8564	536	0	536	0
TCGA_DU_A76R_01	0.3897	0.9088	0.7871	0.8635	648	1
TCGA_E1_A7YD_01	0.0558	0.0398	0.0548	0.0919
TCGA_E1_A7YE_01	0.1334	0.8406	0.7688	0.8927
TCGA_E1_A7YH_01	0.5347	0.7155	0.5055	0.9331
TCGA_E1_A7YI_01	0.109	0.1235	0.1822	0.6938
TCGA_E1_A7YJ_01	0.2011	0.0408	0.1082	0.158
TCGA_E1_A7YK_01	0.3898	0.7267	0.6323	0.8382
TCGA_E1_A7YL_01	0.1049	0.0358	0.0721	0.131
TCGA_E1_A7YM_01	0.33	0.0478	0.1134	0.1138
TCGA_E1_A7YN_01	0.104	0.3	0.2222	0.4719
TCGA_DU_7019_01	0.537	0.8137	0.7884	0.8574	800	0	800	0
TCGA_E1_A7YQ_01	0.2839	0.6007	0.4903	0.6856
TCGA_E1_A7YS_01	0.3946	0.9723	0.9481	0.9317
TCGA_E1_A7YU_01	0.5442	0.8513	0.776	0.8804
TCGA_HT_7601_01	0.4819	0.7798	0.6802	0.8582	153	0	153	0
TCGA_DB_5278_01	0.3518	0.8193	0.7743	0.8614	1526	0	507	1
TCGA_E1_A7YY_01	0.3112	0.5818	0.4678	0.8075
TCGA_E1_A7Z2_01	0.2261	0.0454	0.1346	0.6489
TCGA_E1_A7Z3_01	0.3636	0.7175	0.5725	0.8021
TCGA_E1_A7Z4_01	0.6852	0.9641	0.9071	0.8971
TCGA_WY_A858_01	0.4312	0.6744	0.5931	0.8619	1337	0	1337	0
TCGA_HT_A5R9_01	0.3915	0.8754	0.7714	0.8955	2	0
TCGA_DU_A7TA_01	0.3679	0.9117	0.8737	0.8629	2369	0	2369	0
TCGA_S9_A6TS_01	0.5037	0.9096	0.8256	0.8641	1891	1	1324	1
TCGA_S9_A6U2_01	0.2596	0.7828	0.5203	0.8643	719	0	719	0
TCGA_S9_A7J1_01	0.5529	0.8578	0.747	0.8644	249	0	249	0
TCGA_HT_7479_01	0.4669	0.806	0.7538	0.8663	216	0	216	0
TCGA_HT_A616_01	0.3994	0.8429	0.767	0.9226	55	0
TCGA_DU_7011_01	0.3996	0.7796	0.7512	0.8676	3200	1
TCGA_QH_A6CY_01	0.3772	0.7965	0.7707	0.8673	67	0	67	0
TCGA_HT_7478_01	0.4314	0.7997	0.7352	0.8675	194	0	194	0
TCGA_CS_5393_01	0.4709	0.8666	0.7842	0.8684	1222	0	1222	0
TCGA_FG_7641_01	0.3415	0.8845	0.7709	0.8686	313	0	313	0
TCGA_FG_6689_01	0.5494	0.8409	0.7883	0.8688	190	0	119	1
TCGA_FG_A711_01	0.5652	0.8725	0.8268	0.8691	1329	0	712	1
TCGA_HT_7689_01	0.429	0.8656	0.7165	0.8694	455	0	455	0
TCGA_HT_7474_01	0.4934	0.7477	0.7128	0.87	114	0	114	0
TCGA_DH_A7US_01	0.4335	0.8768	0.7617	0.8703	399	0	399	0
TCGA_DU_A5TR_01	0.5133	0.8154	0.7654	0.8723	383	0	383	0
TCGA_S9_A7IS_01	0.3009	0.715	0.5861	0.8724	241	1	241	0
TCGA_DU_6399_01	0.4996	0.9407	0.9406	0.8729	2000	1	1629	1
TCGA_DU_7304_02	0.1038	0.9755	0.9152	0.8739	709	1	309	1
TCGA_HT_8114_01	0.5159	0.8999	0.7844	0.874	118	0	118	0
TCGA_TM_A84S_01	0.391	0.8309	0.8285	0.8747	454	0	454	0
TCGA_S9_A6U8_01	0.572	0.8678	0.8354	0.8747	2988	1	367	1
TCGA_HT_A615_01	0.4458	0.6637	0.5702	0.8755	515	0	515	0
TCGA_HT_7610_01	0.5219	0.8254	0.756	0.8771	1706	0	1205	1
TCGA_WY_A85A_01	0.4197	0.7885	0.7668	0.8776	1320	0	1320	0
TCGA_P5_A5EX_01	0.3106	0.7761	0.6427	0.8782	50	0	50	0
TCGA_TM_A84Q_01	0.5394	0.7943	0.7687	0.8789	772	0	455	1
TCGA_W9_A837_01	0.5143	0.8316	0.778	0.8792	1553	0	1553	0
TCGA_FG_8187_01	0.4865	0.8198	0.7897	0.8792	611	0	611	0
TCGA_DU_A6S2_01	0.319	0.8584	0.7407	0.8793	263	0	263	0
TCGA_FG_8191_01	0.4115	0.861	0.7796	0.8793	472	0	472	0
TCGA_QH_A6X9_01	0.4602	0.8947	0.8228	0.8801	58	0	58	0
TCGA_DH_A7UT_01	0.369	0.8503	0.7754	0.8806	407	0	404	1
TCGA_E1_5303_01	0.4949	0.8329	0.7502	0.8809	2052	1	156	1
TCGA_VM_A8CE_01	0.4299	0.7933	0.7807	0.8811	1093	0	1093	0
TCGA_HT_7690_01	0.6347	0.9356	0.8319	0.8812	3	0	3	0
TCGA_DH_A669_01	0.4268	0.975	0.9218	0.9223	919	1
TCGA_S9_A6U9_01	0.4158	0.9211	0.8346	0.8813	2918	0	2918	0
TCGA_HT_A74K_01	0.4277	0.8058	0.6709	0.882	467	0	467	0
TCGA_DB_A64S_01	0.1778	0.8583	0.8164	0.8822	835	0	835	0
TCGA_FG_A4MT_02	0.4617	0.8158	0.4873	0.8824	1164	0	499	1
TCGA_S9_A6TX_01	0.5497	0.9469	0.8221	0.8832	1049	0	1049	0
TCGA_FG_7634_01	0.3566	0.9007	0.8526	0.8838	467	0	467	0
TCGA_HT_A4DV_01	0.3812	0.7581	0.5596	0.884	792	0	792	0
TCGA_DU_6397_01	0.5389	0.8571	0.8164	0.8841	1401	1	837	1
TCGA_HT_8111_01	0.4339	0.7972	0.7201	0.8756	7	0
TCGA_S9_A7IY_01	0.5868	0.8265	0.7896	0.8843	715	0	715	0
TCGA_DB_5273_01	0.5353	0.7965	0.762	0.8844	2493	0	2493	0
TCGA_TM_A7CF_01	0.4354	0.8905	0.8171	0.9245	1472	0
TCGA_HW_A5KJ_01	0.4118	0.8822	0.8129	0.8854	619	0	615	1
TCGA_DH_5141_01	0.4414	0.8478	0.7663	0.8856	968	0	968	0
TCGA_DH_5142_01	0.4954	0.878	0.8507	0.8856	922	0	922	0
TCGA_HT_A74J_01	0.5852	0.8837	0.822	0.8861	320	0	320	0
TCGA_HT_7616_01	0.3996	0.8467	0.7668	0.8863	7	1	7	0
TCGA_HT_7684_01	0.5218	0.8892	0.8308	0.8873	184	0	184	0
TCGA_DH_A7UR_01	0.3278	0.819	0.6156	0.8879	1650	0	1650	0
TCGA_S9_A7IZ_01	0.3227	0.8075	0.6886	0.8884	217	0	217	0
TCGA_P5_A730_01	0.4474	0.945	0.8745	0.839	6	0
TCGA_HT_7877_01	0.2701	0.8043	0.7263	0.889	4	0	4	0
TCGA_DU_A6S6_01	0.4501	0.8541	0.5287	0.9202	2372	0
TCGA_HT_7873_01	0.4029	0.9235	0.8714	0.8893	298	0	298	0
TCGA_P5_A5F1_01	0.4621	0.8926	0.8748	0.8899	179	0	179	0
TCGA_HW_8320_01	0.4407	0.9272	0.9071	0.89	272	0	272	0
TCGA_DU_7304_01	0.5431	0.8651	0.8333	0.8903	709	1	309	1
TCGA_HT_7858_01	0.5347	0.8437	0.7322	0.8904	1540	0	1540	0
TCGA_S9_A6WP_01	0.5633	0.8717	0.8867	0.8909	461	0	461	0
TCGA_DH_A7UV_01	0.6347	0.9216	0.9127	0.8912	566	0	566	0
TCGA_F6_A8O4_01	0.1602	0.8614	0.7969	0.8924	6	0	6	0
TCGA_DU_6407_02	0.4233	0.83475	0.7275	0.8926	2875	1	2397	1
TCGA_S9_A6UB_01	0.6882	0.9577	0.8991	0.8928	3236	0	3236	0
TCGA_VM_A8CH_01	0.5138	0.8773	0.7928	0.8929	714	0	714	0
TCGA_FG_A710_01	0.5803	0.9179	0.8065	0.8935	1115	0	1115	0
TCGA_WY_A859_01	0.5087	0.8472	0.6148	0.894	1213	0	1213	0
TCGA_HT_7604_01	0.4194	0.9583	0.907	0.8949	3725	0	3725	0
TCGA_FG_A70Y_01	0.3293	0.8441	0.7174	0.8953	868	0	490	1
TCGA_HT_7879_01	0.5923	0.8901	0.8345	0.8961	112	0	112	0
TCGA_DB_5281_01	0.4967	0.866	0.8736	0.8962	2381	0	2381	0
TCGA_E1_5302_01	0.4465	0.855	0.8257	0.8967	1525	1	1242	1
TCGA_DB_A75M_01	0.4656	0.9305	0.8698	0.8974	544	0	544	0
TCGA_DH_A66G_01	0.5857	0.8348	0.5566	0.8976	523	0	523	0
TCGA_HW_7487_01	0.557	0.8386	0.734	0.8979	409	0	409	0
TCGA_HT_7687_01	0.4715	0.8935	0.8646	0.9153	3	0
TCGA_E1_5311_01	0.6487	0.885	0.8337	0.8979	4084	1	2602	1
TCGA_E1_A7YO_01	0.6204	0.8933	0.8738	0.8979	2282	1	1977	1
TCGA_HW_A5KM_01	0.5763	0.8825	0.8116	0.8986	630	0	630	0
TCGA_DU_7298_01	0.5114	0.7186	0.6313	0.8987	576	1	200	1
TCGA_VM_A8C8_01	0.601	0.8815	0.8253	0.899	1309	0	1309	0
TCGA_S9_A89Z_01	0.4907	0.8403	0.8283	0.8993	364	0	364	0
TCGA_HT_8105_01	0.3902	0.9292	0.8429	0.8994	190	0	190	0
TCGA_DU_6407_01	0.6569	0.9142	0.8739	0.8996	2875	1	2397	1
TCGA_HT_A5R5_01	0.4838	0.7654	0.5076	0.8778	4	0
TCGA_E1_5322_01	0.4483	0.8216	0.7737	0.9005	3978	1	1085	1
TCGA_S9_A6U5_01	0.421	0.8851	0.8727	0.9005	992	0	992	0
TCGA_TM_A84H_01	0.6134	0.8847	0.7752	0.9012	926	0	926	0
TCGA_QH_A86X_01	0.6256	0.9048	0.8758	0.9012	337	0	337	0
TCGA_FG_7636_01	0.6321	0.8919	0.8609	0.9013	544	0	544	0
TCGA_HT_7482_01	0.2897	0.9069	0.8134	0.9018	1826	0	374	1
TCGA_DU_6408_01	0.5356	0.9051	0.8175	0.9018	3470	1	2097	1
TCGA_DB_A64P_01	0.5326	0.9235	0.8922	0.902	916	0	916	0
TCGA_S9_A6WD_01	0.5186	0.9195	0.864	0.9025	2114	0	2114	0
TCGA_HT_7686_01	0.3495	0.8348	0.7312	0.9026	1300	0	1300	0
TCGA_VW_A7QS_01	0.2857	0.879	0.5573	0.9028	706	0	706	0
TCGA_DU_5870_01	0.5217	0.846	0.7493	0.903	5546	0	4347	1
TCGA_QH_A6CZ_01	0.5607	0.9553	0.9186	0.9031	279	0	279	0
TCGA_P5_A5EV_01	0.4978	0.8995	0.8217	0.8774	7	0
TCGA_DH_5140_01	0.2894	0.6965	0.5528	0.9041	607	1	607	0
TCGA_E1_A7Z6_01	0.523	0.8581	0.5246	0.9042	984	1	872	1
TCGA_TM_A7C5_01	0.4764	0.92	0.9351	0.9043	1500	0	1500	0
TCGA_DU_5872_01	0.6185	0.8335	0.5616	0.9044	532	0	265	1
TCGA_S9_A7QZ_01	0.6029	0.9067	0.8369	0.9057	396	0	396	0
TCGA_CS_4942_01	0.5043	0.7877	0.4841	0.9058	1335	1	1184	1
TCGA_VV_A86M_01	0.6526	0.8945	0.8391	0.9058	487	0	487	0
TCGA_DU_7300_01	0.4516	0.7889	0.5226	0.9064	1886	1	317	1
TCGA_HT_7611_01	0.6908	0.9392	0.8978	0.9073	1752	0	1752	0
TCGA_QH_A65V_01	0.3869	0.8721	0.7252	0.9074	384	0	384	0
TCGA_S9_A6WQ_01	0.5269	0.7195	0.4735	0.9075	428	0	428	0
TCGA_DU_7309_01	0.3897	0.8316	0.5629	0.9077	84	0	84	0
TCGA_QH_A65X_01	0.3523	0.9298	0.8785	0.908	482	0	482	0
TCGA_QH_A6CW_01	0.5938	0.9491	0.8785	0.908	414	0	414	0
TCGA_HT_7677_01	0.4057	0.9213	0.8923	0.908	494	0	494	0
TCGA_HT_7855_01	0.6836	0.9492	0.914	0.9085	585	0	585	0
TCGA_TM_A7C4_01	0.5585	0.8263	0.715	0.9088	1470	0	1470	0
TCGA_P5_A5F2_01	0.2747	0.8544	0.548	0.909	232	0	232	0
TCGA_DU_6397_02	0.2171	0.9521	0.8851	0.9093	1401	1	837	1
TCGA_DU_6401_01	0.4322	0.9027	0.4094	0.9096	2660	1	1886	1
TCGA_CS_5394_01	0.5166	0.9586	0.9086	0.9394	3	0
TCGA_R8_A6MO_01	0.518	0.9022	0.7637	0.9148	993	0
TCGA_VV_A829_01	0.2015	0.9522	0.8991	0.9103	1127	0	1127	0
TCGA_DB_A4XD_01	0.6223	0.9262	0.9032	0.9104	1210	0	1210	0
TCGA_DU_7015_01	0.6745	0.899	0.7485	0.9105	2761	0	591	1
TCGA_QH_A6X4_01	0.5633	0.9391	0.8816	0.9108	442	0	442	0
TCGA_HW_8319_01	0.3456	0.913	0.5765	0.9109	262	0	262	0
TCGA_FG_A87N_01	0.224	0.7376	0.6717	0.9109	413	0	413	0
TCGA_HT_7608_01	0.3808	0.8711	0.8004	0.9109	671	0	671	0
TCGA_FG_A6J1_01	0.6497	0.9103	0.5498	0.9113	500	0	500	0
TCGA_HT_A61B_01	0.5056	0.918	0.8583	0.9113	533	0	533	0
TCGA_DB_A75L_01	0.3972	0.8624	0.8382	0.912	342	0	342	0
TCGA_HT_A74L_01	0.6028	0.9687	0.895	0.912	336	0	336	0
TCGA_FG_8185_01	0.6194	0.9438	0.8881	0.9133	433	0	433	0
TCGA_S9_A7J2_01	0.5063	0.9724	0.939	0.9136	62	0	62	0
TCGA_QH_A65S_01	0.2931	0.8598	0.6322	0.9138	77	0	77	0
TCGA_DB_A4XA_01	0.2223	0.8457	0.791	0.914	573	0	573	0
TCGA_RY_A83X_01	0.6115	0.8747	0.7723	0.9149	939	0	939	0
TCGA_S9_A7R3_01	0.5041	0.9298	0.8512	0.9152	3013	0	3013	0
TCGA_DB_5280_01	0.4624	0.9385	0.906	0.9153	1112	0	1112	0
TCGA_DB_A4XE_01	0.6271	0.9322	0.7789	0.9157	1139	0	1139	0
TCGA_TM_A84I_01	0.0773	0.9645	0.8331	0.9157	854	0	854	0
TCGA_S9_A6TY_01	0.6513	0.9179	0.839	0.9162	953	0	953	0
TCGA_FG_A4MX_01	0.5293	0.9417	0.8959	0.9164	569	0	569	0
TCGA_HT_7480_01	0.5419	0.9082	0.8786	0.9165	2287	0	1943	1
TCGA_TM_A84M_01	0.5466	0.9746	0.9139	0.9165	754	0	754	0
TCGA_QH_A6X8_01	0.6033	0.9128	0.8052	0.9166	509	0	509	0
TCGA_DU_7306_01	0.3708	0.9206	0.8396	0.9167	1277	0	1250	1
TCGA_S9_A6WH_01	0.5725	0.7329	0.6254	0.9171	987	0	987	0
TCGA_HT_7695_01	0.4529	0.6552	0.556	0.9172	442	0	442	0
TCGA_IK_8125_01	0.5278	0.9061	0.8346	0.9172	1120	0	1120	0
TCGA_DB_5277_01	0.4358	0.9325	0.8893	0.9179	1547	1	1156	1
TCGA_HT_7609_01	0.5207	0.9159	0.8426	0.918	1399	0	1399	0
TCGA_FG_5965_01	0.5915	0.8601	0.7752	0.9184	979	0	715	1
TCGA_DB_A75O_01	0.5469	0.8309	0.8586	0.9007	935	0
TCGA_KT_A74X_01	0.5533	0.9201	0.8606	0.919	159	0	159	0
TCGA_DU_A7TC_01	0.5294	0.8917	0.8305	0.9192	715	0	715	0
TCGA_DB_A75K_01	0.6627	0.7978	0.4794	0.9194	368	0	368	0
TCGA_HT_7884_01	0.6445	0.8994	0.8124	0.9194	343	0	343	0
TCGA_DB_5274_01	0.6221	0.8905	0.7828	0.9195	2289	0	2289	0
TCGA_DB_A4XG_01	0.4827	0.9701	0.9134	0.9196	2219	0	2219	0
TCGA_DU_6542_01	0.5554	0.9599	0.9115	0.8723	235	0
TCGA_E1_A7YW_01	0.5369	0.9022	0.8675	0.9197	1120	1	980	1
TCGA_QH_A65Z_01	0.7171	0.9641	0.905	0.9203	125	0	125	0
TCGA_P5_A5ET_01	0.4278	0.898	0.8753	0.903
TCGA_P5_A5EU_01	0.2691	0.9312	0.8875	0.8845
TCGA_DU_5870_02	0.475	0.8457	0.4931	0.9204	5546	0	4347	1
TCGA_QH_A6X3_01	0.6104	0.9362	0.8782	0.9207	313	0	313	0
TCGA_FG_A60J_01	0.6404	0.773	0.5645	0.9213	449	0	449	0
TCGA_DU_8164_01	0.668	0.924	0.9053	0.9214	651	0	651	0
TCGA_DU_7299_01	0.5388	0.9006	0.86	0.9218	1339	1	675	1
TCGA_S9_A6TU_01	0.6168	0.8726	0.8428	0.9221	2650	0	2650	1
TCGA_DB_A64U_01	0.5389	0.8756	0.759	0.9222	846	0	846	0
TCGA_DB_A64L_01	0.1912	0.872	0.7623	0.9223	736	0	724	1
TCGA_P5_A72X_01	0.5642	0.8389	0.7826	0.894	403	0
TCGA_HT_7473_01	0.5772	0.8708	0.8146	0.9223	503	0	503	0
TCGA_HT_A614_01	0.5657	0.8806	0.8164	0.9133	82	0
TCGA_HT_A74O_01	0.5662	0.8647	0.8413	0.7696	3	0
TCGA_CS_6665_01	0.427	0.853	0.7248	0.9225	378	0	378	0
TCGA_DU_5855_01	0.5156	0.8788	0.7741	0.9225	207	0	207	0
TCGA_DU_7301_01	0.6615	0.9453	0.8772	0.9225	788	1	366	1
TCGA_FG_6691_01	0.2214	0.8162	0.8004	0.9226	103	0	103	0
TCGA_S9_A6TV_01	0.4627	0.9259	0.8789	0.9226	571	0	571	0
TCGA_P5_A735_01	0.6784	0.9459	0.6307	0.946
TCGA_P5_A736_01	0.4649	0.8364	0.7462	0.9316
TCGA_P5_A737_01	0.6693	0.9649	0.913	0.9146
TCGA_P5_A77W_01	0.5105	0.9133	0.8579	0.9412
TCGA_P5_A77X_01	0.5507	0.6576	0.5541	0.9184
TCGA_P5_A780_01	0.5294	0.839	0.7731	0.919
TCGA_P5_A781_01	0.4822	0.8985	0.7859	0.904
TCGA_DU_A5TU_01	0.5765	0.8764	0.5838	0.9186	111	0
TCGA_HW_8322_01	0.5283	0.9568	0.9299	0.9232	542	0	542	0
TCGA_TM_A84T_01	0.4119	0.9239	0.8632	0.9235	724	0	724	0
TCGA_DU_7010_01	0.2544	0.9443	0.8248	0.9236	456	1	193	1
TCGA_DU_6395_01	0.6271	0.9215	0.8584	0.924	1491	1	1197	1
TCGA_F6_A8O3_01	0.1886	0.897	0.9018	0.9245	7	0	7	0
TCGA_FG_A4MY_01	0.4516	0.7969	0.7439	0.9246	721	0	721	0
TCGA_S9_A7R4_01	0.6885	0.9176	0.8318	0.9247	914	0	914	0
TCGA_R8_A6MK_01	0.584	0.9013	0.86	0.9097	2702	0
TCGA_DB_A4XB_01	0.6323	0.9573	0.89	0.9248	919	0	919	0
TCGA_E1_5318_01	0.6667	0.9149	0.8381	0.925	2379	1	362	1
TCGA_HW_7493_01	0.5723	0.8522	0.7435	0.9254	1092	0	1092	0
TCGA_FG_5962_01	0.5354	0.9098	0.8748	0.9255	787	0	787	0
TCGA_HT_7692_01	0.6049	0.9427	0.8749	0.9255	90	0	90	0
TCGA_S9_A7QY_01	0.359	0.866	0.7602	0.9256	863	0	863	0
TCGA_CS_4943_01	0.4156	0.9636	0.9283	0.9257	552	0	552	0
TCGA_E1_5305_01	0.6413	0.9046	0.8881	0.9262	2433	1	1604	1
TCGA_DU_6394_01	0.2662	0.9641	0.9112	0.9267	682	1	353	1
TCGA_DU_6396_01	0.4937	0.8761	0.7979	0.9268	2286	1	106	1
TCGA_CS_6670_01	0.5372	0.9281	0.8837	0.9269	201	0	201	0
TCGA_P5_A72W_01	0.6958	0.9537	0.8459	0.9274	317	0	317	0
TCGA_DU_A5TP_01	0.5936	0.8737	0.8337	0.8781	433	0
TCGA_HT_7875_01	0.7494	0.9627	0.9077	0.9276	10	0	10	0
TCGA_FG_7637_01	0.4216	0.9521	0.8936	0.9279	1020	0	1020	0
TCGA_R8_A6YH_01	0.4503	0.9681	0.9302	0.8837
TCGA_P5_A733_01	0.6	0.8457	0.7864	0.9005	414	0
TCGA_DU_A7T8_01	0.6008	0.934	0.887	0.9124	3787	0
TCGA_RY_A83Y_01	0.6087	0.9199	0.8749	0.9209
TCGA_RY_A83Z_01	0.242	0.9518	0.8707	0.9298
TCGA_DB_A4XH_01	0.1999	0.9187	0.7868	0.9283	962	0	962	0
TCGA_RY_A843_01	0.4874	0.7337	0.7367	0.8384
TCGA_RY_A845_01	0.4751	0.8669	0.8154	0.9184
TCGA_RY_A847_01	0.4414	0.8425	0.8456	0.8238
TCGA_CS_4944_01	0.602	0.8106	0.7369	0.8978	323	0
TCGA_QH_A65R_01	0.5848	0.9348	0.8303	0.9284	461	0	461	0
TCGA_S9_A6TZ_01	0.6342	0.9273	0.6184	0.9289	873	0	873	0
TCGA_FG_6690_01	0.6149	0.9283	0.8731	0.9289	143	0	143	0
TCGA_HT_7472_01	0.4512	0.8983	0.8245	0.9292	1	0	1	0
TCGA_P5_A5F4_01	0.6041	0.7746	0.4858	0.9098	23	0
TCGA_DU_7302_01	0.6039	0.9203	0.5328	0.9293	1834	0	1374	1
TCGA_DU_8166_01	0.4846	0.9259	0.8229	0.9293	516	0	193	1
TCGA_DU_7009_01	0.4106	0.9249	0.8375	0.9294	4206	0	2960	1
TCGA_DB_A4XF_01	0.435	0.9273	0.8433	0.9296	1021	0	1021	0
TCGA_CS_5396_01	0.3403	0.9289	0.8544	0.9302	303	0	303	0
TCGA_DH_A66D_01	0.618	0.9116	0.5208	0.9303	846	0	846	0
TCGA_DU_5871_01	0.3568	0.9035	0.7824	0.9303	576	0	576	0
TCGA_FN_7833_01	0.6214	0.9255	0.8763	0.9304	837	0	837	0
TCGA_DU_8167_01	0.5601	0.8801	0.634	0.9305	471	0	471	0
TCGA_DH_5143_01	0.6155	0.8283	0.8271	0.9308	438	0	438	0
TCGA_E1_5307_01	0.627	0.8946	0.8546	0.9308	1762	1	1452	1
TCGA_QH_A870_01	0.5488	0.9134	0.8274	0.9309	395	0	335	1
TCGA_S9_A7QW_01	0.6892	0.7159	0.4425	0.9318	458	0	290	1
TCGA_HT_7693_01	0.7015	0.9432	0.5561	0.9321	533	0	533	0
TCGA_S9_A7R1_01	0.4843	0.9014	0.8721	0.9322	5166	1	5166	0
TCGA_DU_A5TW_01	0.5925	0.9221	0.8453	0.9323	172	0	172	0
TCGA_HT_8012_01	0.7104	0.953	0.8952	0.9323	286	0	133	1
TCGA_S9_A6WO_01	0.4742	0.9356	0.9143	0.9324	566	0	566	0
TCGA_CS_6666_01	0.4831	0.9595	0.9452	0.9325	258	0	258	0
TCGA_DU_A6S7_01	0.4505	0.8785	0.5426	0.9329	220	0	220	0
TCGA_TM_A84O_01	0.1552	0.8218	0.7274	0.9329	1011	1	1011	0
TCGA_FG_A6IZ_01	0.7691	0.9726	0.9403	0.9329	457	0	457	0
TCGA_S9_A7J0_01	0.6096	0.9781	0.9125	0.9334	609	0	390	1
TCGA_DH_A7UU_01	0.1516	0.9352	0.8752	0.9336	105	0	105	0
TCGA_DU_6400_01	0.7638	0.9678	0.7309	0.934	37	1	37	0
TCGA_DB_A64Q_01	0.42	0.8905	0.8183	0.9346	182	0	182	0
TCGA_HT_7485_01	0.6443	0.9133	0.8234	0.935	122	0	122	0
TCGA_FG_8186_01	0.379	0.8794	0.8338	0.9352	487	0	487	0
TCGA_S9_A7R8_01	0.6332	0.9684	0.8941	0.9155	961	1
TCGA_DB_A64X_01	0.4562	0.7644	0.5773	0.9353	563	0	563	0
TCGA_HT_A619_01	0.3806	0.9645	0.8764	0.9353	587	0	587	0
TCGA_HT_8013_01	0.5837	0.878	0.7815	0.9354	1933	1	1306	1
TCGA_HT_8108_01	0.6141	0.7786	0.4781	0.9356	76	0	76	0
TCGA_VM_A8CB_01	0.6413	0.9511	0.9295	0.8994	3	0
TCGA_DU_7014_01	0.5072	0.9025	0.8911	0.9358	3571	1	3437	1
TCGA_DH_A66F_01	0.5916	0.9423	0.913	0.9361	523	0	523	0
TCGA_S9_A7J3_01	0.5907	0.8692	0.7684	0.9363	518	0	518	0
TCGA_DB_5275_01	0.6472	0.9253	0.889	0.9389	1458	0
TCGA_HT_7468_01	0.4808	0.9747	0.9299	0.9363	203	0	203	0
TCGA_TM_A84G_01	0.3616	0.8184	0.5581	0.9365	1236	0	1236	0
TCGA_E1_5319_01	0.5626	0.8462	0.7475	0.9365	2907	1	923	1
TCGA_HT_7475_01	0.67	0.9106	0.8494	0.9371	530	0	530	0
TCGA_HT_7676_01	0.6563	0.8979	0.8731	0.9254	5	0
TCGA_CS_5390_01	0.5772	0.9424	0.8572	0.9373	1966	0	1966	0
TCGA_HW_7490_01	0.4996	0.8796	0.866	0.9373	585	0	585	0
TCGA_DU_A6S8_01	0.4422	0.9269	0.5146	0.938	182	0	182	0
TCGA_CS_4938_01	0.6167	0.7993	0.7417	0.9381	143	0	143	0
TCGA_RY_A840_01	0.6145	0.9559	0.8459	0.9383	854	0	854	0
TCGA_FG_A60K_01	0.6602	0.9284	0.8575	0.939	542	0	542	0
TCGA_DU_7018_01	0.5575	0.9452	0.8712	0.9391	933	1	338	1
TCGA_FG_7638_01	0.4609	0.8974	0.505	0.9398	686	0	407	1
TCGA_R8_A73M_01	0.6886	0.9604	0.5705	0.9401	1806	0	1806	0
TCGA_IK_7675_01	0.5893	0.966	0.9329	0.9402	578	1	123	1
TCGA_DB_A64W_01	0.6885	0.9432	0.8829	0.9403	438	1	438	0
TCGA_DB_A4X9_01	0.6709	0.9366	0.5419	0.9406	1412	0	1412	0
TCGA_HT_A5RB_01	0.6748	0.8957	0.8941	0.8973	3	0
TCGA_HT_7606_01	0.5435	0.9751	0.8978	0.9409	526	0	526	0
TCGA_DU_8168_01	0.5838	0.9748	0.7862	0.941	431	0	431	0
TCGA_HT_7483_01	0.5855	0.9074	0.8336	0.9419	5255	0	5255	0
TCGA_P5_A5EW_01	0.2596	0.7865	0.5717	0.9426	204	0	204	0
TCGA_HW_A5KL_01	0.5149	0.9318	0.5342	0.9434	633	0	633	0
TCGA_QH_A6CU_01	0.3751	0.9202	0.8134	0.9439	451	0	451	0
TCGA_TQ_A7RF_01	0.6531	0.9308	0.8942	0.9124
TCGA_TQ_A7RG_01	0.5494	0.9466	0.8678	0.8894
TCGA_TQ_A7RH_01	0.6048	0.9181	0.8672	0.9119
TCGA_TQ_A7RI_01	0.4322	0.8717	0.5473	0.8797
TCGA_TQ_A7RJ_01	0.5079	0.8676	0.8525	0.8076
TCGA_TQ_A7RK_01	0.4081	0.9256	0.8931	0.8949
TCGA_TQ_A7RK_02	0.39235	0.9044	0.86285	0.7473
TCGA_TQ_A7RM_01	0.324	0.9712	0.6989	0.902
TCGA_TQ_A7RN_01	0.6131	0.95	0.8763	0.9267
TCGA_TQ_A7RO_01	0.5367	0.9045	0.8476	0.8297
TCGA_TQ_A7RP_01	0.1408	0.0481	0.1101	0.1089
TCGA_TQ_A7RQ_01	0.2126	0.7385	0.5587	0.9212
TCGA_TQ_A7RR_01	0.4383	0.7587	0.7613	0.8749
TCGA_TQ_A7RS_01	0.4667	0.9597	0.8809	0.9335
TCGA_TQ_A7RU_01	0.4233	0.9768	0.9192	0.9102
TCGA_TQ_A7RV_01	0.5747	0.873	0.8427	0.884
TCGA_TQ_A7RV_02	0.4735	0.6325	0.6831	0.7078
TCGA_TQ_A7RW_01	0.3744	0.846	0.779	0.8449
TCGA_TQ_A8XE_01	0.5051	0.7154	0.4951	0.9378
TCGA_TQ_A8XE_02	0.5704	0.5591	0.432	0.9193
TCGA_DU_5874_01	0.7497	0.9786	0.9247	0.944	461	0	461	0
TCGA_DB_5279_01	0.4096	0.9524	0.8888	0.9457	1354	0	695	1
TCGA_R8_A6ML_01	0.6975	0.9573	0.8931	0.9192	2860	0
TCGA_DU_7294_01	0.6718	0.9271	0.6477	0.9467	2869	0	2869	0
TCGA_DB_A64R_01	0.7301	0.6564	0.5795	0.9473	955	0	955	0
TCGA_HT_7471_01	0.716	0.9491	0.914	0.9476	4	0
TCGA_VM_A8CF_01	0.4786	0.7961	0.5754	0.9139
TCGA_FG_A4MT_01	0.6176	0.967	0.5531	0.9502	1164	0	499	1
TCGA_DU_6393_01	0.721	0.9735	0.9359	0.8964	1585	1
TCGA_E1_5304_01	0.7999	0.977	0.9593	0.9511	1251	1	903	1
TCGA_DU_6410_01	0.6735	0.975	0.9442	0.9528	242	0	242	0
TCGA_DU_7008_01	0.4664	0.9146	0.6648	0.9541	4752	0	330	1
TCGA_HW_7491_01	0.7244	0.9579	0.9246	0.9542	1222	0	1222	0
TCGA_EZ_7264_01	0.6127	0.9798	0.9187	0.9585	436	0	436	0
TCGA_CS_6668_01	0.5017	0.982	0.9305	0.9597	244	0	244	0
TCGA_S9_A7QX_01	0.5678	0.9269	0.5102	0.96	399	0	399	0
TCGA_DH_5144_01	0.5216	0.963	0.9089	0.964	244	0	244	0
TCGA_WY_A85B_01	0.6559	0.897	0.8599	0.9289
TCGA_WY_A85C_01	0.5895	0.8686	0.82	0.8641
TCGA_WY_A85D_01	0.5957	0.9253	0.8665	0.9174
TCGA_WY_A85E_01	0.6257	0.8637	0.8123	0.9257
